# Supplementary material
Source: PubMed Central journal article supplement (PMC5726400)
Supplement: NIHMS923115-supplement-SI.pdf [file NIHMS923115-supplement-SI.pdf]

## **Understanding and Interrupting the Fischer Azaindolization Reaction**

Bryan J. Simmons, Marie Hoffmann, Pier Alexandre Champagne, Elias Picazo,  
Katsuya Yamakawa, Lucas A. Morrill, K. N. Houk,\* Neil K. Garg\*

*Department of Chemistry and Biochemistry, University of California  
Los Angeles, California 90095*

### Supporting Information – Table of Contents

|                                                                          |             |
|--------------------------------------------------------------------------|-------------|
| <b>Part I: Experimental Section</b> .....                                | <b>S2</b>   |
| <b>Materials and Methods</b> .....                                       | <b>S2</b>   |
| <b>A. Syntheses of Hydrazine Substrates</b> .....                        | <b>S3</b>   |
| <b>B. Scope of Methodology</b> .....                                     | <b>S9</b>   |
| <b>C. Synthesis of an Aza-Analogue of Phensvenine</b> .....              | <b>S15</b>  |
| <b>D. Synthesis of an Aza-Analogue of Aspidophylline A</b> .....         | <b>S18</b>  |
| <b>References for Experimental Section</b> .....                         | <b>S20</b>  |
| <b><sup>1</sup>H NMR Spectra</b> .....                                   | <b>S21</b>  |
| <b><sup>13</sup>C NMR Spectra</b> .....                                  | <b>S50</b>  |
| <br>                                                                     |             |
| <b>Part II: Computational Section</b> .....                              | <b>S79</b>  |
| <b>Full computational details</b> .....                                  | <b>S79</b>  |
| <b>Additional figures and discussion</b> .....                           | <b>S80</b>  |
| <b>Origin of regioselectivity</b> .....                                  | <b>S86</b>  |
| <b>Cartesian coordinates, energies and vibrational frequencies</b> ..... | <b>S88</b>  |
| <b>References for Computational Section</b> .....                        | <b>S139</b> |

## **Part I: Experimental Section**

**Materials and Methods.** Unless stated otherwise, reactions were conducted in flame-dried glassware under an atmosphere of air and commercially obtained reagents were used as received. Non-commercially available substrates were synthesized following protocols specified in Section A of the Experimental Procedures. Di-*tert*-butyl hydrazodiformate (**SI-4**), amine **SI-2**, boronate ester **SI-9**, Pd<sub>2</sub>(dba)<sub>3</sub>, Cu(OAc)<sub>2</sub>, and dppf were obtained from Sigma-Aldrich and used as received. Di-*tert*-butyl azodicarboxylate (**SI-7**), bromopyridines **SI-3**, **SI-12**, amine **SI-1**, and boronate ester **SI-14** were obtained from Combi-Blocks and used as received. Amines **SI-11** and **SI-13** were obtained from Oakwood and used as received. Boronic acid **SI-6** was obtained from Frontier Scientific and used as received. Solid supported thiol-resin MetSThiol<sup>®</sup> was obtained from SiliCycle (Product # R51030B). Reaction temperatures were controlled using an IKA Mag temperature modulator, and unless stated otherwise, reactions were performed at elevated temperatures (approximately 120 °C). Thin-layer chromatography (TLC) was conducted with EMD gel 60 F254 pre-coated plates (0.25 mm for analytical chromatography and 0.50 mm for preparative chromatography) and visualized using a combination of UV, anisaldehyde, iodine, and potassium permanganate staining techniques. Silicycle Siliaflash P60 (particle size 0.040–0.063 mm) was used for flash column chromatography. <sup>1</sup>H NMR spectra were recorded on Bruker spectrometers (at 300, 400 and 500 MHz) and are reported relative to residual solvent signals. Data for <sup>1</sup>H NMR spectra are reported as follows: chemical shift (δ ppm), multiplicity, coupling constant (Hz), integration. Data for <sup>13</sup>C NMR are reported in terms of chemical shift (at 100 and 125 MHz). IR spectra were recorded on a Perkin-Elmer UATR Two FT-IR spectrometer and are reported in terms of frequency absorption (cm<sup>-1</sup>). DART-MS spectra were collected on a Thermo Exactive Plus MSD (Thermo Scientific) equipped with an ID-CUBE ion source and a Vapor Interface (IonSense Inc.). Both the source and MSD were controlled by Excalibur software v. 3.0. The analyte was spotted onto OpenSpot sampling cards (IonSense Inc.) using volatile solvents (e.g. chloroform, dichloromethane). Ionization was accomplished using UHP He (Airgas Inc.) plasma with no additional ionization agents. The mass calibration was carried out using Pierce LTQ Velos ESI (+) and (-) Ion calibration solutions (Thermo Fisher Scientific). Optical rotations were measured with a Rudolf Autopol III Automatic Polarimeter.

## A. Syntheses of Hydrazine Substrates

**Representative Procedure A for the synthesis of hydrazine substrates from Tables 1 and 2. (37 is used as an example).**

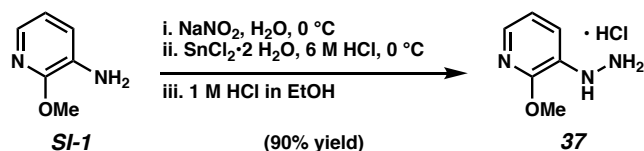

**Hydrazine 37.** To a solution of aniline **SI-1** (200.0 mg, 1.60 mmol, 1.0 equiv) in 6 M HCl (3.0 mL, 0.5 M) at 0 °C was added dropwise a solution of NaNO<sub>2</sub> (107.0 mg, 1.55 mmol, 1.0 equiv) in deionized H<sub>2</sub>O (4.0 mL, 0.4 M) over 1 min under an air atmosphere. After stirring at 0 °C for 30 min, a solution of SnCl<sub>2</sub>·2 H<sub>2</sub>O (878.0 mg, 3.90 mmol, 2.5 equiv) in 6 M HCl (3.0 mL, 1.3 M) was added dropwise over 1 min. The reaction was allowed to stir at 0 °C for 1 h, then quenched with a solution of 40% w/w KOH in deionized H<sub>2</sub>O until a pH of 12 had been reached (ca. 10 mL). The solution was transferred to a separatory funnel and extracted with EtOAc (4 x 20 mL). The organic layers were combined, dried over MgSO<sub>4</sub>, and the volatiles were removed under reduced pressure. The resulting crude residue was taken up in EtOAc (6.0 mL) and cooled to 0 °C. Next, 1 M HCl in EtOH (8.0 mL, 0.2 M) was added dropwise over 1 min. The resulting precipitate was collected by filtration through a vacuum filter. The solid residue was washed with CH<sub>2</sub>Cl<sub>2</sub> (5 mL) and dried under reduced pressure to yield hydrazine **37** as a solid (252.8 mg, 90% yield). Hydrazine **37**: mp: 151–152 °C; *R<sub>f</sub>* 0.57 (EtOAc); <sup>1</sup>H NMR (500 MHz, DMSO-*d*<sub>6</sub>): δ 10.40 (br. s, 3H), 8.09 (br. s, 2H), 7.72 (dd, *J* = 5.1, 1.5, 1H), 7.40 (dd, *J* = 7.7, 1.5, 1H), 6.94 (dd, *J* = 7.7, 5.1, 1H) 3.90 (s, 3H); <sup>13</sup>C NMR (125 MHz, DMSO-*d*<sub>6</sub>): δ 152.3, 138.0, 129.4, 120.8, 117.0, 53.4; IR (film): 3347, 3091, 2589, 1565, 788 cm<sup>-1</sup>; HRMS-APCI (*m/z*) [M + H]<sup>+</sup> calcd for C<sub>6</sub>H<sub>10</sub>N<sub>3</sub>O<sup>+</sup>, 140.08184; found 140.08159.

**Representative Procedure B for the synthesis of hydrazine substrates from Table 2. (41 is used as an example).**

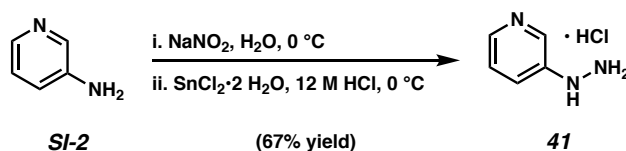

**Hydrazine 41.** To a solution of aniline **SI-2** (1.0 g, 10.60 mmol, 1.0 equiv) in 12 M HCl (10.0 mL, 1.1 M) at 0 °C was added dropwise a solution of NaNO<sub>2</sub> (768.0 mg, 11.10 mmol, 1.0 equiv) in deionized H<sub>2</sub>O (10.0 mL, 1.1 M) over 1 min under an air atmosphere. After stirring at 0 °C for 30 min, a solution of SnCl<sub>2</sub>·2 H<sub>2</sub>O (6.0 g, 26.50 mmol, 2.5 equiv) in 12 M HCl (10.0 mL, 2.6 M) was added dropwise over 1 min. The reaction was allowed to stir at 0 °C for 30 min. The precipitate was then removed by vacuum filtration. The filtrate was left to evaporate over 48 h allowing crystals to form. The resulting solid was transferred to a filter paper, washed with Et<sub>2</sub>O (10 mL), and dried under reduced pressure to yield hydrazine **41** as a solid (1.03 g, 67% yield). Hydrazine **41**: mp: 181–183 °C; R<sub>f</sub> 0.08 (EtOAc); <sup>1</sup>H NMR (500 MHz, DMSO-*d*<sub>6</sub>): δ 11.45 (br. s, 3H), 9.54 (br. s, 1H), 8.45–8.43 (m, 2H), 8.04–8.02 (m, 1H), 7.96–7.93 (m, 1H); <sup>13</sup>C NMR (125 MHz, DMSO-*d*<sub>6</sub>): δ 144.9, 133.8, 129.3, 127.3, 126.8; IR (film): 3500, 3060, 2656, 1548, 787 cm<sup>-1</sup>; HRMS-APCI (*m/z*) [M + H]<sup>+</sup> calcd for C<sub>5</sub>H<sub>8</sub>N<sub>3</sub><sup>+</sup>, 110.07127; found 110.07105.

**Representative Procedure C for the synthesis of hydrazine substrates from Table 2. (39 is used as an example).**

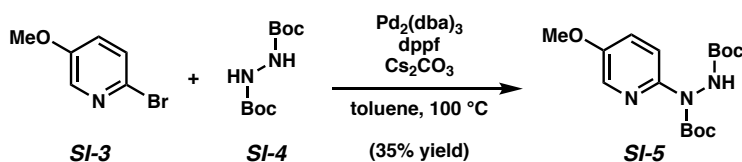

**Boc-Hydrazine SI-5.** A 1-dram vial charged with a magnetic stir bar and Cs<sub>2</sub>CO<sub>3</sub> (876.7 mg, 2.69 mmol, 1.25 equiv) was flame-dried under reduced pressure, and allowed to cool under a N<sub>2</sub> atmosphere. Bromide **SI-3** (505.9 mg, 2.69 mmol, 1.25 equiv) and di-*tert*-butyl hydrazodiformate (**SI-4**) (500.0 mg, 2.15 mmol, 1.0 equiv) were added and the vial was flushed with N<sub>2</sub> for 5 min. The vial was taken into a glovebox and charged with Pd<sub>2</sub>(dba)<sub>3</sub> (98.5 mg, 0.11 mmol, 0.05 equiv), dppf (179.1 mg, 0.32 mmol, 0.15 equiv), and toluene (3.6 mL, 0.75 M). The

vial was then capped with a Teflon-lined screw cap and taken out of the glovebox where it was placed in a pre-heated aluminum block and allowed to stir at 100 °C for 24 h. After cooling to room temperature, the reaction mixture was diluted with CH<sub>2</sub>Cl<sub>2</sub> (15 mL) and filtered through a plug of celite (30 mL of CH<sub>2</sub>Cl<sub>2</sub> as eluent). The organics were transferred to a separatory funnel and washed sequentially with deionized water (2 x 15 mL), saturated aqueous NaCl (15 mL), and dried over Na<sub>2</sub>SO<sub>4</sub>. The volatiles were removed under reduced pressure. The resulting crude residue was purified by flash chromatography (1:1 Hexanes:EtOAc) to yield Boc-hydrazine **SI-5** (253.9 mg, 35% yield) as a light brown solid.

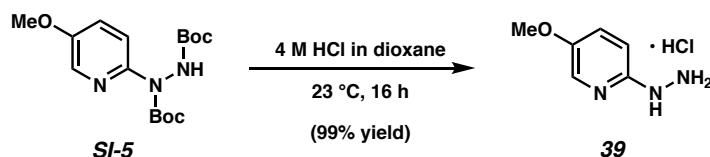

**Hydrazine 39.** A 20 mL scintillation vial equipped with a magnetic stir bar was charged with Boc-hydrazine **SI-5** (269.5 mg, 0.79 mmol, 1.0 equiv) and 4 M HCl in dioxane (5.3 mL, 0.15 M). After stirring at 23 °C for 16 h, the volatiles were removed under reduced pressure. The resulting crude solid was transferred to a filter paper, washed with EtOAc (5 mL), and dried under reduced pressure to yield hydrazine **39** (141.1 mg, 99% yield) as a yellow solid. Hydrazine **39**: mp: 198–200 °C; *R<sub>f</sub>* 0.09 (EtOAc); <sup>1</sup>H NMR (500 MHz, DMSO-*d*<sub>6</sub>): δ 9.70 (br. s, 3H), 9.03 (br. s, 1H), 7.88 (d, *J* = 2.8, 1H), 7.44 (dd, *J* = 9.1, 2.8, 1H), 6.88 (app. dd, *J* = 9.1, 2.8, 1H), 3.78 (s, 3H); <sup>13</sup>C NMR (125 MHz, DMSO-*d*<sub>6</sub>): 150.8, 150.3, 130.3, 126.6, 110.6, 56.0; IR (film): 3308, 2940, 2646, 1620, 1584 cm<sup>-1</sup>; HRMS-APCI (*m/z*) [M + H]<sup>+</sup> calcd for C<sub>6</sub>H<sub>10</sub>N<sub>3</sub>O<sup>+</sup>, 140.08184; found 140.08163.

**Representative Procedure D for the synthesis of hydrazine substrates from Table 2. (33 is used as an example).**

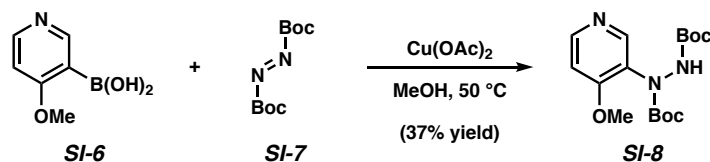

**Boc-Hydrazine SI-8.** A 20 mL scintillation vial was charged with a magnetic stir bar, flame-dried under reduced pressure, and allowed to cool under a N<sub>2</sub> atmosphere. Boronic acid **SI-6** (300.0 mg, 1.76 mmol, 1.0 equiv), di-*tert*-butyl azodicarboxylate (**SI-7**) (444.6 mg, 1.93 mmol, 1.1 equiv), Cu(OAc)<sub>2</sub> (31.9 mg, 0.17 mmol, 0.10 equiv), and MeOH (7.0 mL, 0.25 M) were

added under an atmosphere of air. The vial was capped with a Teflon-lined screw cap, placed in a pre-heated aluminum block, and allowed to stir at 50 °C for 3 h. After cooling to room temperature, the volatiles were removed under reduced pressure. The reaction mixture was then transferred to a separatory funnel with deionized water (5 mL) and CH<sub>2</sub>Cl<sub>2</sub> (5 mL). The layers were separated and the aqueous layer was extracted with CH<sub>2</sub>Cl<sub>2</sub> (3 x 5 mL). The organic layers were combined, washed with saturated aqueous NaCl (15 mL), and then dried over Na<sub>2</sub>SO<sub>4</sub>. The volatiles were removed under reduced pressure. The resulting crude residue was purified by flash chromatography (1:10 Hexanes:EtOAc, 2% Et<sub>3</sub>N) to yield Boc-hydrazine **SI-8** (221.7 mg, 37% yield) as a white solid.

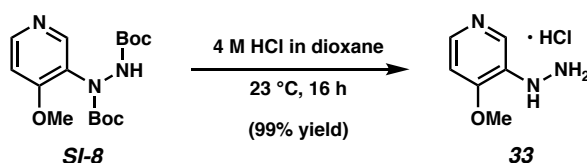

**Hydrazine 33.** A 20 mL scintillation vial equipped with a magnetic stir bar was charged with Boc-hydrazine **SI-8** (221.7 mg, 0.65 mmol, 1.0 equiv) and 4 M HCl in dioxane (4.4 mL, 0.15 M). After stirring at 23 °C for 16 h, the volatiles were removed under reduced pressure. The resulting crude residue was transferred to a filter paper, washed with EtOAc (5 mL), and dried under reduced pressure to yield hydrazine **33** (140.4 mg, 99% yield) as a light brown solid. Hydrazine **33**: mp: 178–180 °C; *R<sub>f</sub>* 0.07 (EtOAc); <sup>1</sup>H NMR (500 MHz, DMSO-*d*<sub>6</sub>): δ 8.81 (br. s, 1H), 8.52 (dd, *J* = 6.5, 0.7, 1H), 8.42 (d, *J* = 0.7, 1H), 7.59 (d, *J* = 6.5, 1H), 4.12 (s, 3H); <sup>13</sup>C NMR (125 MHz, DMSO-*d*<sub>6</sub>): 158.9, 136.7, 134.2, 124.1, 108.3, 58.1; IR (film): 3382, 3206, 2851, 2051, 1505 cm<sup>-1</sup>; HRMS-APCI (*m/z*) [*M* + *H*]<sup>+</sup> calcd for C<sub>6</sub>H<sub>10</sub>N<sub>3</sub>O<sup>+</sup>, 140.08184; found 140.08165.

**Representative Procedure E for the synthesis of hydrazine substrates from Table 2. (35 is used as an example).**

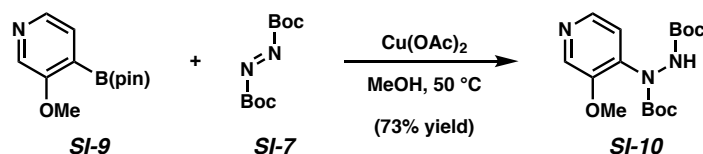

**Boc-Hydrazine SI-10.** A 20 mL scintillation vial was charged with a magnetic stir bar, flame-dried under reduced pressure, and allowed to cool under a N<sub>2</sub> atmosphere. Boronate ester **SI-9** (300.0 mg, 1.28 mmol, 1.0 equiv), di-*tert*-butyl azodicarboxylate (**SI-7**) (326.0 mg, 1.40 mmol,

1.1 equiv), Cu(OAc)<sub>2</sub> (23.2 mg, 0.13 mmol, 0.10 equiv), and MeOH (5.1 mL, 0.25 M) were added under an atmosphere of air. The vial was capped with a Teflon-lined screw cap, placed in a pre-heated aluminum block, and then allowed to stir at 50 °C for 3 h. After cooling to room temperature, the volatiles were removed under reduced pressure. The reaction mixture was then transferred to a separatory funnel with deionized water (5 mL) and CH<sub>2</sub>Cl<sub>2</sub> (5 mL). The layers were separated and the aqueous layer was extracted with CH<sub>2</sub>Cl<sub>2</sub> (3 x 5 mL). The organic layers were combined, washed with saturated aqueous NaCl (15 mL), and then dried over Na<sub>2</sub>SO<sub>4</sub>. The volatiles were removed under reduced pressure. The resulting crude residue was purified by flash chromatography (1:10 Hexanes: EtOAc, 2% Et<sub>3</sub>N) to yield Boc-hydrazine **SI-10** (316.3 mg, 73% yield) as a colorless foam.

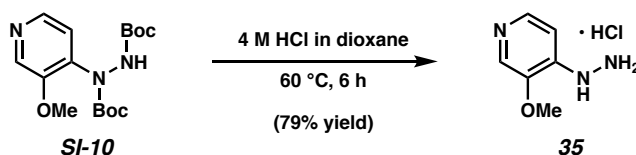

**Hydrazine 35.** A 20 mL scintillation vial equipped with a magnetic stir bar was charged with Boc-hydrazine **SI-10** (131.8 mg, 0.39 mmol, 1.0 equiv) and 4 M HCl in dioxane (2.6 mL, 0.15 M). The vial was then capped with a Teflon-lined screw cap and was placed in a pre-heated aluminum block at 60 °C for 6 h. Once at room temperature, the volatiles were removed under reduced pressure. The resulting crude residue was transferred to a filter paper, washed with EtOAc (5 mL), and dried under reduced pressure to yield hydrazine **35** (53.7 mg, 79% yield) as a yellow solid. Hydrazine **35**: mp: 225–228 °C; *R<sub>f</sub>* 0.00 (EtOAc); <sup>1</sup>H NMR (500 MHz, DMSO-*d*<sub>6</sub>): δ 9.70 (br. s, 1H), 8.19 (d, *J* = 6.6, 1H), 8.08 (s, 1H), 7.21 (d, *J* = 6.6, 1H), 3.94 (s, 3H); <sup>13</sup>C NMR (125 MHz, DMSO-*d*<sub>6</sub>): 149.1, 141.9, 135.7, 120.0, 104.0, 57.2; IR (film): 3366, 3215, 2834, 1631, 1536 cm<sup>-1</sup>; HRMS-APCI (*m/z*) [M + H]<sup>+</sup> calcd for C<sub>6</sub>H<sub>10</sub>N<sub>3</sub>O<sup>+</sup>, 140.08184; found 140.08159.

Note: Supporting information for the syntheses of some substrates (i.e., lactols, hemiaminals, ketones) used in Tables 1 and 2 and Figure 4 have previously been reported: **14**<sup>1</sup>, **16**<sup>1</sup>, **18**<sup>1</sup>, **20**<sup>1</sup>, **22**<sup>1</sup>, **24**<sup>1</sup>, **26**<sup>2</sup>, and **46**<sup>3</sup>. Syntheses for the remaining substrates shown in Tables 1 and 2 and Figure 4 are as follows:

*Any modification of the conditions shown in the representative procedures above are specified in the following schemes.*

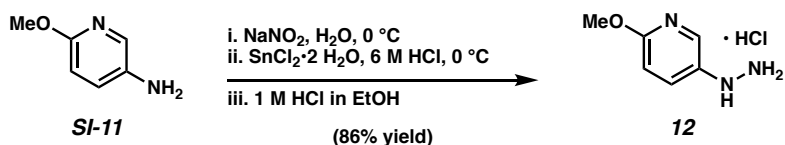

**Hydrazine 12.** Following representative procedure A yielded hydrazine **12** (2.42 g, 86% yield) as a light brown solid. Hydrazine **12**: mp: 175–178 °C;  $R_f$  0.27 (EtOAc);  $^1\text{H}$  NMR (500 MHz, DMSO- $d_6$ ):  $\delta$  10.45 (br. s, 4H), 7.99 (d,  $J = 2.8$ , 1H), 7.65 (dd,  $J = 9.1, 2.8$ , 1H), 6.90 (d,  $J = 9.1$ , 1H), 3.83 (s, 3H);  $^{13}\text{C}$  NMR (125 MHz, DMSO- $d_6$ ): 158.8, 136.7, 132.4, 130.3, 110.7, 54.0; IR (film): 3368, 3201, 2564, 1627, 1562  $\text{cm}^{-1}$ ; HRMS-APCI ( $m/z$ )  $[\text{M} + \text{H}]^+$  calcd for  $\text{C}_6\text{H}_{10}\text{N}_3\text{O}^+$ , 140.08184; found 140.08154.

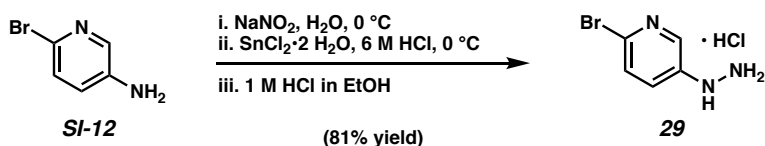

**Hydrazine 29.** Following representative procedure A yielded hydrazine **29** (280.7 mg, 81% yield) as an orange solid. Hydrazine **29**: mp: 211–213 °C;  $R_f$  0.37 (EtOAc);  $^1\text{H}$  NMR (500 MHz, DMSO- $d_6$ ):  $\delta$  10.43 (br. s, 3H), 8.69 (br. s, 1H), 8.08 (d,  $J = 3.0$ , 1H), 7.56 (d,  $J = 8.5$ , 1H), 7.35 (dd,  $J = 8.5, 3.0$ , 1H);  $^{13}\text{C}$  NMR (125 MHz, DMSO- $d_6$ ): 142.1, 136.9, 131.9, 127.7, 125.4; IR (film): 3070, 2883, 2645, 1927, 1619  $\text{cm}^{-1}$ ; HRMS-APCI ( $m/z$ )  $[\text{M} + \text{H}]^+$  calcd for  $\text{C}_5\text{H}_7\text{N}_3\text{Br}^+$ , 187.98179; found 187.98140.

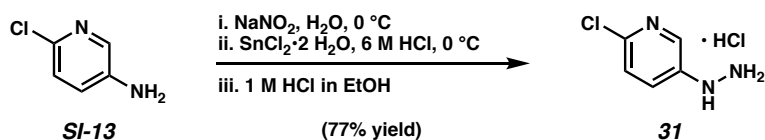

**Hydrazine 31.** Following representative procedure A yielded hydrazine **31** (215.3 mg, 77% yield) as a light brown solid. Hydrazine **31**: mp: 208–209 °C;  $R_f$  0.37 (EtOAc);  $^1\text{H}$  NMR (500 MHz, DMSO- $d_6$ ):  $\delta$  10.45 (br. s, 3H), 8.72 (br. s, 1H), 8.10–8.09 (m, 1H), 7.47–7.43 (m, 2H);  $^{13}\text{C}$  NMR (125 MHz, DMSO- $d_6$ ): 141.9, 141.6, 136.1, 125.5, 124.0; IR (film): 3378, 3197, 2662, 1617, 1470  $\text{cm}^{-1}$ ; HRMS-APCI ( $m/z$ )  $[\text{M} + \text{H}]^+$  calcd for  $\text{C}_5\text{H}_7\text{N}_3\text{Cl}^+$ , 144.03230; found 144.03195.



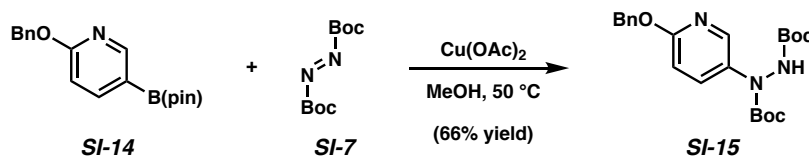

**Boc-Hydrazine SI-15.** Following representative procedure E. Purification by flash chromatography (5:1 Hexanes:EtOAc) yielded Boc-hydrazine **SI-15** (560.0 mg, 66% yield) as a light yellow solid.

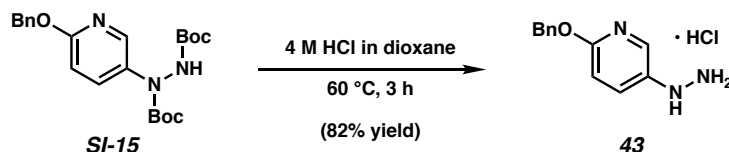

**Hydrazine 43.** Following representative procedure E yielded hydrazine **43** (280.1 mg, 82% yield) as a yellow solid. Hydrazine **43**: mp: 125–128 °C;  $R_f$  0.33 (EtOAc);  $^1\text{H}$  NMR (500 MHz, DMSO- $d_6$ ):  $\delta$  10.11 (br. s, 3H), 9.90 (br. s, 1H), 7.89 (d,  $J = 2.5$ , 1H), 7.47 (app. dt,  $J = 8.8$ , 2.5, 1H), 7.38 (d,  $J = 7.3$ , 2H), 7.33 (t,  $J = 7.3$ , 2H), 7.27 (t,  $J = 7.3$ , 1H), 6.84 (d,  $J = 8.8$ , 1H), 5.26 (s, 2H);  $^{13}\text{C}$  NMR (125 MHz, DMSO- $d_6$ ): 158.8, 137.4, 136.5, 133.8, 129.2, 128.4, 127.8, 127.7, 110.8, 67.0; IR (film): 3389, 2894, 2646, 1946, 1556  $\text{cm}^{-1}$ ; HRMS-APCI ( $m/z$ ) [ $M + \text{H}$ ] $^+$  calcd for  $\text{C}_{12}\text{H}_{14}\text{N}_3\text{O}^+$ , 216.11314; found 216.11281.

## B. Scope of Methodology

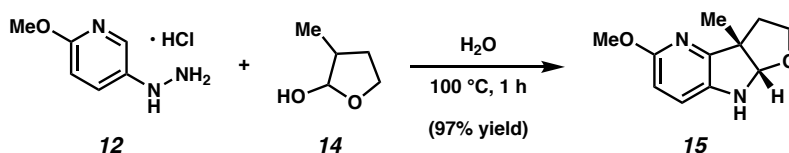

**Representative Procedure (azaindoline 15 is used as an example).** Azaindoline **15**. A scintillation vial containing a magnetic stir bar was charged with lactol **14** (23.6 mg, 0.231 mmol, 1.0 equiv) and deionized  $\text{H}_2\text{O}$  (4.6 mL, 0.05 M). Hydrazine **12** (60.9 mg, 0.347 mmol, 1.5 equiv) was added and the vial was capped with a Teflon-lined screw cap. The reaction mixture was then placed in a pre-heated aluminum block and allowed to stir at 100 °C for 1 h. After cooling to room temperature, the reaction mixture was transferred to a separatory funnel with deionized  $\text{H}_2\text{O}$  (3 mL) and EtOAc (3 mL). The reaction mixture was then basified to a pH of 12 by the addition of 40% w/w KOH in deionized  $\text{H}_2\text{O}$  (ca. 4 mL). The layers were separated and the aqueous layer was extracted with EtOAc (3 x 5 mL). The combined organic layers were washed with saturated aqueous NaCl (5 mL), and then dried over  $\text{Na}_2\text{SO}_4$ . The volatiles were

removed under reduced pressure, and the crude residue was purified by preparative thin-layer chromatography (2:1 Hexanes:EtOAc) to yield azaindoline **15** (97% yield, average of two experiments) as a yellow oil. Azaindoline **15**:  $R_f$  0.55 (1:1 Hexanes:EtOAc);  $^1\text{H}$  NMR (500 MHz,  $\text{CDCl}_3$ ):  $\delta$  6.88 (d,  $J = 8.4$ , 1H), 6.43 (d,  $J = 8.4$ , 1H), 5.27 (s, 1H), 3.96 (ddd,  $J = 8.9$ , 7.6, 1.7, 1H), 3.87 (s, 3H), 3.53 (ddd,  $J = 10.9$ , 8.9, 5.3, 1H), 2.40 (ddd,  $J = 12.1$ , 5.3, 1.7, 1H), 2.03 (ddd,  $J = 12.1$ , 10.9, 7.6, 1H), 1.48 (s, 3H);  $^{13}\text{C}$  NMR (125 MHz,  $\text{CDCl}_3$ ): 159.7, 151.2, 136.8, 119.7, 107.4, 99.1, 67.6, 54.3, 53.8, 39.6, 22.6; IR (film): 3347, 2961, 2867, 1603, 1471  $\text{cm}^{-1}$ ; HRMS-APCI ( $m/z$ )  $[\text{M} + \text{H}]^+$  calcd for  $\text{C}_{11}\text{H}_{15}\text{N}_2\text{O}_2^+$ , 207.11280; found 207.11237.

Any modifications of the conditions shown in the representative procedure above are specified in the following schemes, which depict all of the results shown in Tables 1 and 2.

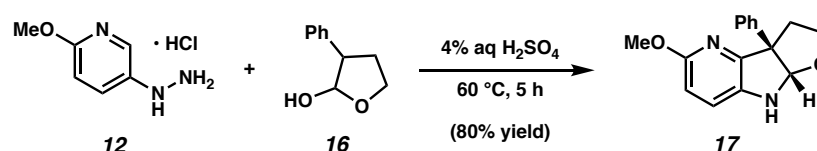

**Azaindoline 17.** Purification by preparative thin-layer chromatography (2:1 Hexanes:EtOAc) yielded azaindoline **17** (80% yield, average of two experiments) as an amorphous solid. Azaindoline **17**:  $R_f$  0.63 (1:1 Hexanes:EtOAc);  $^1\text{H}$  NMR (500 MHz,  $\text{CDCl}_3$ ):  $\delta$  7.42 (d,  $J = 7.8$ , 2H), 7.32 (t,  $J = 7.8$ , 2H), 7.26–7.21 (m, 1H), 6.94 (d,  $J = 8.6$ , 1H), 6.47 (d,  $J = 8.6$ , 1H), 5.69 (s, 1H), 4.39 (s, 1H), 4.18–4.15 (m, 1H), 3.85 (s, 3H), 3.67–3.62 (m, 1H), 2.85–2.82 (m, 1H), 2.65–2.59 (m, 1H);  $^{13}\text{C}$  NMR (125 MHz,  $\text{CDCl}_3$ ): 159.8, 149.1, 142.6, 137.6, 128.6, 126.9, 126.5, 120.5, 108.4, 99.7, 68.6, 62.4, 53.8, 39.7; IR (film): 3341, 2866, 2973, 1602, 1470  $\text{cm}^{-1}$ ; HRMS-APCI ( $m/z$ )  $[\text{M} + \text{H}]^+$  calcd for  $\text{C}_{16}\text{H}_{17}\text{N}_2\text{O}_2^+$ , 269.12845; found 269.12688.

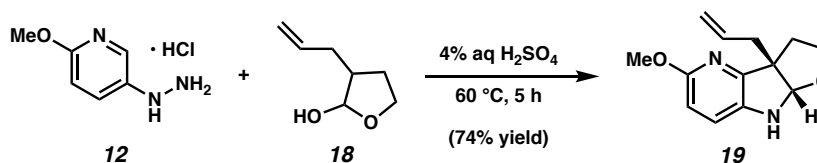

**Azaindoline 19.** Purification by preparative thin-layer chromatography (3:2 Hexanes:EtOAc) yielded azaindoline **19** (74% yield, average of two experiments) as a red oil. Azaindoline **19**:  $R_f$  0.62 (1:1 Hexanes:EtOAc);  $^1\text{H}$  NMR (400 MHz,  $\text{CDCl}_3$ ):  $\delta$  6.88–6.86 (m, 1H), 6.45–6.42 (m,

1H), 5.75–5.65 (m, 1H), 5.39 (s, 1H), 5.10–5.06 (m, 1H), 5.03–4.99 (m, 1H), 3.98–3.93 (m, 1H), 3.87 (s, 3H), 3.53 (ddd,  $J = 11.2, 8.8, 5.3$ , 1H), 2.75–2.69 (m, 1H), 2.52–2.47 (m, 1H), 2.34–2.29 (m, 1H), 2.09 (app. ddd,  $J = 11.2, 11.2, 7.4$ , 1H);  $^{13}\text{C}$  NMR (100 MHz,  $\text{CDCl}_3$ ): 159.8, 149.9, 137.7, 134.4, 119.9, 118.0, 107.8, 96.8, 67.3, 58.1, 53.9, 40.9, 37.9; IR (film): 3343, 2973, 2947, 1603, 1471  $\text{cm}^{-1}$ ; HRMS-APCI ( $m/z$ )  $[\text{M} + \text{H}]^+$  calcd for  $\text{C}_{13}\text{H}_{17}\text{N}_2\text{O}_2^+$ , 233.12845; found 233.12790.

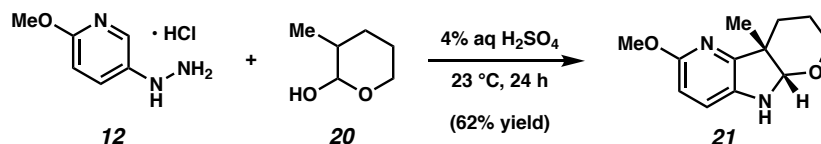

**Azaindoline 21.** Purification by preparative thin-layer chromatography (3:2 Hexanes:EtOAc) yielded azaindoline **21** (62% yield, average of two experiments) as an amorphous solid. Azaindoline **21**:  $R_f$  0.59 (1:1 Hexanes:EtOAc);  $^1\text{H}$  NMR (400 MHz,  $\text{CDCl}_3$ ):  $\delta$  6.93 (d,  $J = 8.1$ , 1H), 6.41 (d,  $J = 8.1$ , 1H), 4.74 (s, 1H), 4.04 (br. s, 1H), 3.87 (s, 3H), 3.75 (dddd,  $J = 11.2, 4.0, 4.0, 1.6$ , 1H), 3.40 (ddd,  $J = 11.2, 10.0, 3.0$ , 1H), 2.45 (dddd,  $J = 13.3, 4.0, 4.0, 1.6$ , 1H), 1.62 (ddd,  $J = 13.6, 11.8, 4.7$ , 1H), 1.55–1.47 (m, 1H), 1.47–1.36 (m, 1H), 1.17 (s, 3H);  $^{13}\text{C}$  NMR (100 MHz,  $\text{CDCl}_3$ ): 159.7, 152.9, 136.4, 120.4, 106.2, 94.9, 63.0, 53.9, 44.2, 29.2, 24.7, 22.2; IR (film): 3319, 2950, 2851, 1603, 1464  $\text{cm}^{-1}$ ; HRMS-APCI ( $m/z$ )  $[\text{M} + \text{H}]^+$  calcd for  $\text{C}_{12}\text{H}_{17}\text{N}_2\text{O}_2^+$ , 221.12845; found 221.12779.

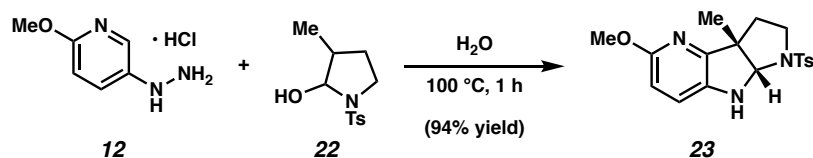

**Azaindoline 23.** Purification by preparative thin-layer chromatography (2:1 Hexanes:EtOAc) yielded azaindoline **23** (94% yield, average of two experiments) as a colorless oil. Azaindoline **23**:  $R_f$  0.77 (1:1 Hexanes:EtOAc);  $^1\text{H}$  NMR (400 MHz,  $\text{CDCl}_3$ ):  $\delta$  7.74 (d,  $J = 8.3$ , 2H), 7.32 (d,  $J = 8.3$ , 2H), 6.90 (d,  $J = 8.4$ , 1H), 6.44 (d,  $J = 8.4$ , 1H), 4.98 (s, 1H), 3.84 (s, 3H), 3.39 (ddd,  $J = 10.5, 8.2, 2.3$ , 1H), 3.10 (ddd,  $J = 10.5, 10.5, 6.4$ , 1H), 2.44 (s, 3H), 2.41 (ddd,  $J = 12.5, 6.4, 2.3$ , 1H), 1.70 (ddd,  $J = 12.5, 10.5, 8.2$ , 1H), 1.27 (s, 3H);  $^{13}\text{C}$  NMR (100 MHz,  $\text{CDCl}_3$ ): 159.9, 150.2, 143.8, 136.3, 136.0, 129.9, 127.2, 120.9, 107.9, 84.1, 54.6, 53.9, 47.7, 36.1, 22.4, 21.7; IR (film): 3375, 2963, 2867, 1597, 1470  $\text{cm}^{-1}$ ; HRMS-APCI ( $m/z$ )  $[\text{M} + \text{H}]^+$  calcd for  $\text{C}_{18}\text{H}_{22}\text{N}_3\text{O}_3\text{S}^+$ , 360.13764; found 360.13632.

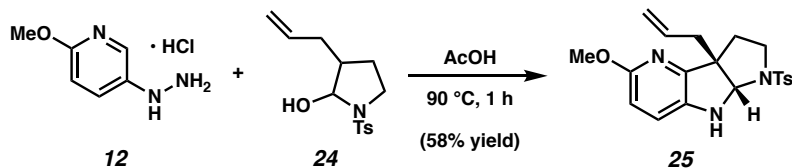

**Azaindoline 25.** Purification by preparative thin-layer chromatography (2:1 Hexanes:EtOAc) yielded azaindoline **25** (58% yield, average of two experiments) as a colorless oil. Azaindoline **25**:  $R_f$  0.70 (1:1 Hexanes:EtOAc);  $^1\text{H NMR}$  (500 MHz,  $\text{CDCl}_3$ ):  $\delta$  7.74 (d,  $J = 7.8$ , 2H), 7.32 (d,  $J = 7.8$ , 2H), 6.89 (d,  $J = 8.4$ , 1H), 6.45 (d,  $J = 8.4$ , 1H), 5.54 (dddd,  $J = 17.4$ , 10.0, 7.4, 7.4, 1H), 5.11 (s, 1H), 4.98–4.93 (m, 2H), 4.52 (br. s, 1H), 3.84 (s, 3H), 3.38 (ddd,  $J = 10.3$ , 8.3, 2.3, 1H), 3.10 (ddd,  $J = 10.3$ , 10.3, 6.2, 1H), 2.44 (s, 3H), 2.41–2.38 (m, 1H), 2.32–2.27 (m, 2H), 1.78 (ddd,  $J = 12.2$ , 10.2, 8.3, 1H);  $^{13}\text{C NMR}$  (125 MHz,  $\text{CDCl}_3$ ): 159.8, 149.0, 143.8, 137.0, 136.0, 133.5, 129.9, 127.3, 120.8, 118.5, 108.2, 81.6, 58.2, 53.9, 47.5, 40.5, 34.2, 21.7; IR (film): 3376, 3072, 2950, 1598, 1471  $\text{cm}^{-1}$ ; HRMS-APCI ( $m/z$ )  $[\text{M} + \text{H}]^+$  calcd for  $\text{C}_{20}\text{H}_{24}\text{N}_3\text{O}_3\text{S}^+$ , 386.15329; found 386.15111.

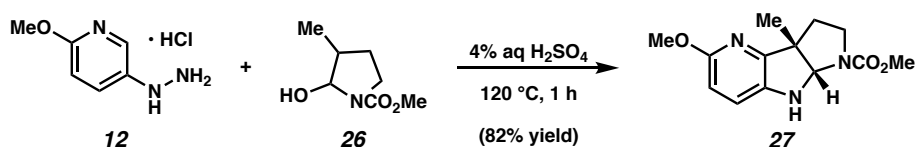

**Azaindoline 27.** Purification by preparative thin-layer chromatography (1:1 Hexanes:EtOAc) yielded azaindoline **27** (82% yield, average of two experiments) as an amorphous solid. Azaindoline **27**:  $R_f$  0.46 (1:1 Hexanes:EtOAc);  $^1\text{H NMR}$  (500 MHz,  $\text{CDCl}_3$ , 58  $^\circ\text{C}$ ):  $\delta$  6.85 (d,  $J = 8.3$ , 1H), 6.43 (d,  $J = 8.3$ , 1H), 5.10 (br. s, 1H), 3.88 (s, 3H), 3.72–3.64 (m, 4H), 3.09–3.04 (m, 1H), 2.53–2.49 (m, 1H), 2.02–1.95 (m, 1H), 1.42 (s, 3H);  $^{13}\text{C NMR}$  (125 MHz,  $\text{C}_6\text{D}_6$ , **Major rotational isomer**): 160.0, 155.4, 150.2, 137.0, 120.7, 109.0, 82.1, 53.4, 53.2, 51.9, 45.9, 35.4, 22.2;  $^{13}\text{C NMR}$  (125 MHz,  $\text{C}_6\text{D}_6$ , **Minor rotational isomer**, 11 of 13 peaks seen): 160.2, 154.4, 150.3, 136.6, 120.6, 109.1, 81.4, 54.6, 52.1, 46.4, 22.7; IR (film): 3360, 2956, 2869, 1696, 1605  $\text{cm}^{-1}$ ; HRMS-APCI ( $m/z$ )  $[\text{M} + \text{H}]^+$  calcd for  $\text{C}_{13}\text{H}_{18}\text{N}_3\text{O}_3^+$ , 264.13427; found 264.13304.

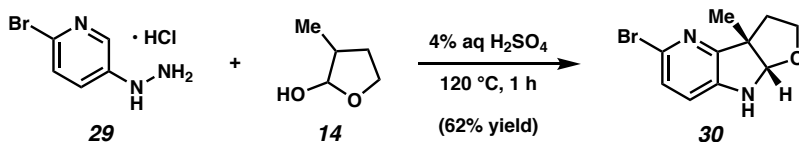

**Azaindoline 30.** Purification by preparative thin-layer chromatography (1:1 Hexanes:EtOAc) yielded azaindoline **30** (62% yield, average of two experiments) as a light brown solid. Azaindoline **30**: mp: 170–171  $^\circ\text{C}$ ;  $R_f$  0.50 (1:1 Hexanes:EtOAc);  $^1\text{H NMR}$  (500 MHz,  $\text{CDCl}_3$ ):  $\delta$

7.08 (d,  $J = 8.3$ , 1H), 6.89 (d,  $J = 8.3$ , 1H), 5.29 (s, 1H), 4.64 (br. s, 1H), 3.98 (ddd,  $J = 8.9$ , 7.6, 1.6, 1H), 3.52 (dddd,  $J = 11.3$ , 8.9, 5.3, 1H), 2.43 (ddd,  $J = 12.3$ , 5.3, 1.6, 1H), 2.05 (ddd,  $J = 12.3$ , 11.3, 7.6, 1H), 1.50 (s, 3H);  $^{13}\text{C}$  NMR (125 MHz,  $\text{CDCl}_3$ ): 156.1, 142.2, 129.8, 126.2, 116.7, 98.5, 67.7, 54.2, 39.9, 22.8; IR (film): 3328, 2963, 2866, 1595, 1426  $\text{cm}^{-1}$ ; HRMS-APCI ( $m/z$ )  $[\text{M} + \text{H}]^+$  calcd for  $\text{C}_{10}\text{H}_{12}\text{N}_2\text{OBr}^+$ , 255.01275; found 255.01276.

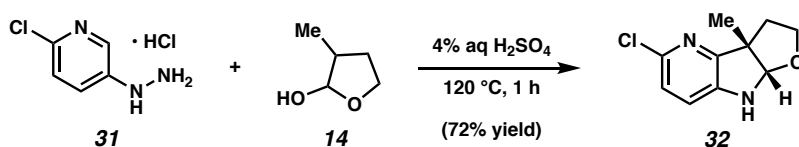

**Azaindoline 32.** Purification by preparative thin-layer chromatography (1:1 Hexanes:EtOAc) yielded azaindoline **32** (72% yield, average of two experiments) as a brown solid. Azaindoline **32**: mp: 143–145 °C;  $R_f$  0.50 (1:1 Hexanes:EtOAc);  $^1\text{H}$  NMR (500 MHz,  $\text{CDCl}_3$ ):  $\delta$  6.95 (d,  $J = 8.3$ , 1H), 6.77 (d,  $J = 8.3$ , 1H), 5.31 (s, 1H), 4.62 (br. s, 1H), 3.99 (ddd,  $J = 8.9$ , 7.6, 1.6, 1H), 3.53 (ddd,  $J = 11.3$ , 8.9, 5.3, 1H), 2.43 (ddd,  $J = 12.3$ , 5.3, 1.6, 1H), 2.06 (ddd,  $J = 12.3$ , 11.3, 7.6, 1H), 1.51 (s, 3H);  $^{13}\text{C}$  NMR (125 MHz,  $\text{CDCl}_3$ ): 155.3, 141.8, 140.5, 122.5, 116.7, 98.6, 67.7, 54.2, 39.9, 22.8; IR (film): 3319, 2965, 2867, 1596, 1430  $\text{cm}^{-1}$ ; HRMS-APCI ( $m/z$ )  $[\text{M} + \text{H}]^+$  calcd for  $\text{C}_{10}\text{H}_{12}\text{N}_2\text{OCl}^+$ , 211.06327; found 211.06329.

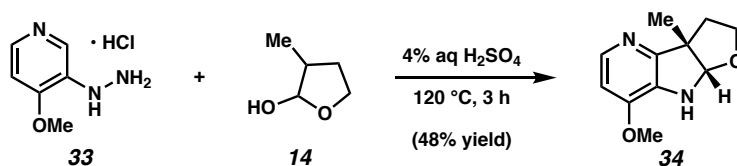

**Azaindoline 34.** Purification by preparative thin-layer chromatography (EtOAc) yielded azaindoline **34** (48% yield, average of two experiments) as an amorphous solid. Azaindoline **34**:  $R_f$  0.26 (EtOAc);  $^1\text{H}$  NMR (500 MHz,  $\text{CDCl}_3$ ):  $\delta$  7.94 (d,  $J = 5.3$ , 1H), 6.61 (d,  $J = 5.3$ , 1H), 5.33 (s, 1H), 4.51 (br. s, 1H), 3.99 (ddd,  $J = 8.8$ , 7.6, 1.5, 1H), 3.88 (s, 3H), 3.54 (ddd,  $J = 11.2$ , 8.8, 5.5, 1H), 2.45 (ddd,  $J = 12.2$ , 5.5, 1.5, 1H), 2.08 (ddd,  $J = 12.2$ , 11.2, 7.6, 1H), 1.53 (s, 3H);  $^{13}\text{C}$  NMR (125 MHz,  $\text{CDCl}_3$ ): 154.2, 149.8, 141.9, 132.3, 105.7, 98.8, 67.9, 55.5, 54.9, 39.8, 22.8; IR (film): 3308, 2926, 2867, 1614, 1498  $\text{cm}^{-1}$ ; HRMS-APCI ( $m/z$ )  $[\text{M} + \text{H}]^+$  calcd for  $\text{C}_{11}\text{H}_{15}\text{N}_2\text{O}_2^+$ , 207.11280; found 207.11210.

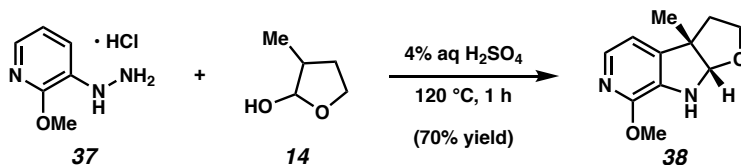

**Azaindoline 38.** Purification by preparative thin-layer chromatography (2:1 Hexanes:EtOAc) yielded azaindoline **38** (70% yield, average of two experiments) as a colorless solid. Azaindoline **38**: mp: 143–145 °C;  $R_f$  0.51 (1:1 Hexanes:EtOAc);  $^1\text{H}$  NMR (500 MHz,  $\text{CDCl}_3$ ):  $\delta$  7.64 (d,  $J = 5.1$ , 1H), 6.70 (d,  $J = 5.1$ , 1H), 5.34 (s, 1H), 4.48 (br. s, 1H), 3.99–3.95 (m, 4H), 3.54 (ddd,  $J = 11.2$ , 8.7, 5.1, 1H), 2.16 (ddd,  $J = 12.3$ , 5.1, 1.6, 1H), 2.07 (ddd,  $J = 12.3$ , 11.2, 7.3, 1H), 1.47 (s, 3H);  $^{13}\text{C}$  NMR (125 MHz,  $\text{CDCl}_3$ ): 150.0, 142.3, 137.1, 132.9, 112.3, 99.9, 67.6, 55.1, 53.2, 40.8, 23.9; IR (film): 3328, 2956, 2867, 1611, 1471  $\text{cm}^{-1}$ ; HRMS-APCI ( $m/z$ )  $[\text{M} + \text{H}]^+$  calcd for  $\text{C}_{11}\text{H}_{15}\text{N}_2\text{O}_2^+$ , 207.11280; found 207.11261.

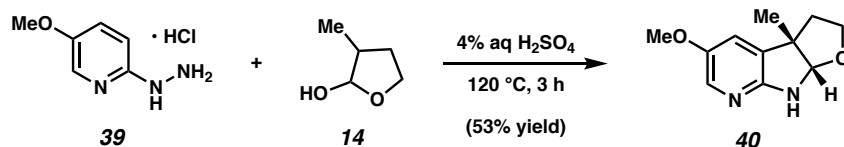

**Azaindoline 40.** Purification by preparative thin-layer chromatography (1:1 Hexanes:EtOAc) yielded azaindoline **40** (53% yield, average of two experiments) as a yellow solid. Azaindoline **40**: mp: 87–90 °C;  $R_f$  0.13 (1:1 Hexanes:EtOAc);  $^1\text{H}$  NMR (500 MHz,  $\text{CDCl}_3$ ):  $\delta$  7.56 (d,  $J = 2.7$ , 1H), 6.95 (d,  $J = 2.7$ , 1H), 5.31 (s, 1H), 5.11 (br. s, 1H), 3.97 (ddd,  $J = 8.8$ , 7.0, 1.6, 1H), 3.78 (s, 3H), 3.58 (ddd,  $J = 10.9$ , 8.8, 5.4, 1H), 2.13–2.03 (m, 2H), 1.47 (s, 3H);  $^{13}\text{C}$  NMR (125 MHz,  $\text{CDCl}_3$ ): 156.7, 150.5, 130.9, 128.8, 120.6, 98.0, 67.2, 56.8, 52.6, 41.5, 24.7; IR (film): 3206, 2956, 2866, 1627, 1480  $\text{cm}^{-1}$ ; HRMS-APCI ( $m/z$ )  $[\text{M} + \text{H}]^+$  calcd for  $\text{C}_{11}\text{H}_{15}\text{N}_2\text{O}_2^+$ , 207.11280; found 207.11214.

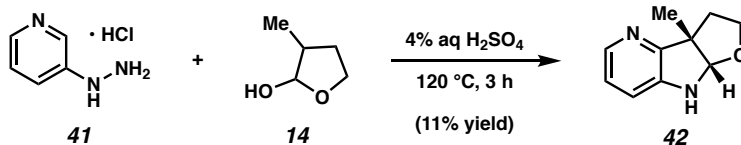

**Azaindoline 42.** Purification by preparative thin-layer chromatography (98:2 EtOAc:Et<sub>3</sub>N) yielded azaindoline **42** (11% yield, average of two experiments) as an amorphous solid. Azaindoline **42**:  $R_f$  0.44 (EtOAc);  $^1\text{H}$  NMR (500 MHz,  $\text{CDCl}_3$ ):  $\delta$  7.95 (dd,  $J = 5.1$ , 1.4, 1H), 6.93 (dd,  $J = 7.9$ , 5.1, 1H), 6.79 (dd,  $J = 7.9$ , 1.4, 1H), 5.31 (s, 1H), 4.59 (br. s, 1H), 3.99 (ddd,  $J = 8.9$ , 7.6, 1.6, 1H), 3.53 (ddd,  $J = 11.2$ , 8.9, 5.3, 1H), 2.43 (ddd,  $J = 12.2$ , 5.3, 1.6, 1H), 2.09 (ddd,  $J = 12.2$ , 11.2, 7.6, 1H), 1.52 (s, 3H);  $^{13}\text{C}$  NMR (125 MHz,  $\text{CDCl}_3$ ): 155.0, 142.7, 140.1,

122.5, 113.9, 98.3, 67.7, 54.0, 40.1, 22.9; IR (film): 3330, 2961, 2867, 1602, 1436  $\text{cm}^{-1}$ ; HRMS-APCI ( $m/z$ )  $[\text{M} + \text{H}]^+$  calcd for  $\text{C}_{10}\text{H}_{13}\text{N}_2\text{O}^+$ , 177.10224; found 177.10093.

### C. Synthesis of an Aza-Analogue of Phensvenine

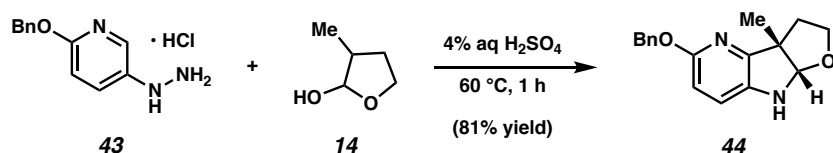

**Azaindoline 44.** A round-bottom flask containing a magnetic stir bar was charged with lactol **14** (37.2 mg, 0.364 mmol, 1.0 equiv) and 4% aqueous  $\text{H}_2\text{SO}_4$  (7.3 mL, 0.05 M). Hydrazine **43** (274.3 mg, 1.092 mmol, 3.0 equiv) was added and the flask equipped with an air condenser. The reaction mixture was then placed in a pre-heated oil bath and allowed to stir at 60 °C for 1 h. After cooling to room temperature, the reaction mixture was transferred to a separatory funnel with deionized  $\text{H}_2\text{O}$  (5 mL) and EtOAc (5 mL). The reaction mixture was then basified to a pH of 9 with saturated aqueous  $\text{NaHCO}_3$  (ca. 10 mL). The layers were separated and the aqueous layer was extracted with EtOAc (3 x 10 mL). The combined organic layers were washed with saturated aqueous  $\text{NaCl}$  (10 mL), and then dried over  $\text{Na}_2\text{SO}_4$ . The volatiles were removed under reduced pressure, and the crude residue was purified by flash chromatography (2:1 Hexanes:EtOAc) to yield azaindoline **44** (83.2 mg, 81% yield) as a yellow oil. Azaindoline **44**:  $R_f$  0.54 (1:1 Hexanes:EtOAc);  $^1\text{H}$  NMR (500 MHz,  $\text{CDCl}_3$ ):  $\delta$  7.46 (d,  $J = 7.2$ , 2H), 7.35 (t,  $J = 7.2$ , 2H), 7.30–7.28 (m, 1H), 6.87 (d,  $J = 8.5$ , 1H), 6.48 (d,  $J = 8.5$ , 1H), 5.31 (s, 1H), 5.30 (s, 1H), 5.27 (s, 1H), 4.25 (br. s, 1H), 3.97 (ddd,  $J = 9.1, 7.7, 1.7$ , 1H), 3.53 (ddd,  $J = 11.1, 9.1, 5.1$ , 1H), 2.39 (ddd,  $J = 12.1, 5.1, 1.7$ , 1H), 2.04 (ddd,  $J = 12.1, 11.1, 7.7$ , 1H), 1.48 (s, 3H);  $^{13}\text{C}$  NMR (125 MHz,  $\text{CDCl}_3$ ): 159.1, 151.0, 138.1, 137.1, 128.5, 128.3, 127.8, 119.9, 108.6, 99.2, 68.1, 67.7, 54.5, 39.7, 22.8; IR (film): 3348, 2963, 2930, 1603, 1447  $\text{cm}^{-1}$ ; HRMS-APCI ( $m/z$ )  $[\text{M} + \text{H}]^+$  calcd for  $\text{C}_{17}\text{H}_{19}\text{N}_2\text{O}_2^+$ , 283.14410; found 283.14342.

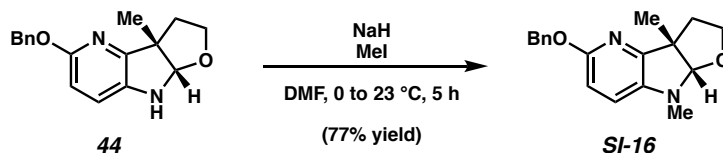

**Azaindoline SI-16.** A 1-dram vial was charged with a magnetic stir bar, flame-dried under reduced pressure, and allowed to cool under a  $\text{N}_2$  atmosphere. Azaindoline **44** (83.0 mg, 0.294 mmol, 1.0 equiv) was added and the vial was flushed with  $\text{N}_2$  for 5 min. DMF (294  $\mu\text{L}$ , 1.0 M)

was added and the reaction mixture cooled to 0 °C under an N<sub>2</sub> atmosphere. NaH (60% dispersion in mineral oil, 26.0 mg, 0.647 mmol, 2.2 equiv) was added in one portion and the reaction was left to stir for 30 min at 0 °C. MeI (44 μL, 0.706 mmol, 2.4 equiv) was then added dropwise over 1 min. After 30 min stirring at 0 °C, the reaction mixture was warmed to 23 °C and allowed to stir for 4 h. The reaction mixture was then transferred to a separatory funnel with deionized H<sub>2</sub>O (3 mL) and CH<sub>2</sub>Cl<sub>2</sub> (3 mL). The layers were separated and the aqueous layer was extracted with CH<sub>2</sub>Cl<sub>2</sub> (3 x 5 mL). The combined organic layers were washed sequentially with deionized H<sub>2</sub>O (3 x 3 mL) and saturated aqueous NaCl (10 mL), and then dried over Na<sub>2</sub>SO<sub>4</sub>. The volatiles were removed under reduced pressure, and the crude residue was purified by flash chromatography (3:1 Hexanes:EtOAc) to yield azaindoline **SI-16** (61.0 mg, 77% yield) as a colorless oil. Azaindoline **SI-16**: R<sub>f</sub> 0.46 (3:1 Hexanes:EtOAc); <sup>1</sup>H NMR (500 MHz, CDCl<sub>3</sub>): δ 7.46 (d, *J* = 7.5, 2H), 7.35 (t, *J* = 7.5, 2H), 7.30–7.27 (m, 1H), 6.64 (d, *J* = 8.3, 1H), 6.50 (d, *J* = 8.3, 1H), 5.32–5.27 (m, 2H), 5.04 (s, 1H), 3.96 (ddd, *J* = 9.0, 7.6, 1.6, 1H), 3.43 (ddd, *J* = 11.2, 9.0, 5.6, 1H), 2.88 (s, 3H), 2.36 (ddd, *J* = 12.2, 5.6, 1.6, 1H), 2.02 (ddd, *J* = 12.2, 11.2, 7.6, 1H), 1.47 (s, 3H); <sup>13</sup>C NMR (125 MHz, CDCl<sub>3</sub>): 157.9, 151.5, 139.7, 138.2, 128.4, 128.3, 127.7, 115.8, 108.0, 104.3, 68.2, 67.7, 53.4, 39.7, 32.0, 22.7; IR (film): 2930, 2864, 1595, 1457, 1421 cm<sup>-1</sup>; HRMS-APCI (*m/z*) [M + H]<sup>+</sup> calcd for C<sub>18</sub>H<sub>21</sub>N<sub>2</sub>O<sub>2</sub><sup>+</sup>, 297.15975; found 297.15959.

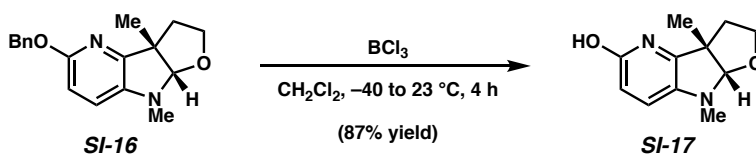

**Hydroxyazaindoline SI-17.** A 1-dram vial was charged with a magnetic stir bar, flame-dried under reduced pressure, and allowed to cool under a N<sub>2</sub> atmosphere. Azaindoline **SI-16** (3.3 mg, 0.011 mmol, 1.0 equiv) was added and the vial was flushed with N<sub>2</sub> for 5 min. CH<sub>2</sub>Cl<sub>2</sub> (222 μL, 0.05 M) was added and the reaction mixture cooled to -40 °C. BCl<sub>3</sub> (1 M in CH<sub>2</sub>Cl<sub>2</sub>, 78.0 μL, 0.078 mmol, 7.0 equiv) was added dropwise over 1 min and the reaction mixture was stirred at -40 °C. After 5 min, the reaction mixture was warmed to 23 °C and allowed to stir for 4 h. The reaction mixture was then transferred to separatory funnel containing ice-cold deionized H<sub>2</sub>O (5 mL). The reaction mixture was basified to a pH of 9 with saturated aqueous NaHCO<sub>3</sub> (5 mL) and then extracted with EtOAc (5 x 3 mL). The combined organic layers were washed with saturated aqueous NaCl (10 mL), and subsequently dried over Na<sub>2</sub>SO<sub>4</sub>. The volatiles were removed under reduced pressure, and the crude residue was purified by preparative thin-layer chromatography



(EtOAc) to yield hydroxyazaindoline **SI-17** (1.9 mg, 87% yield) as a brown solid. Hydroxyazaindoline **SI-17**: mp: 169–170 °C;  $R_f$  0.36 (EtOAc);  $^1\text{H}$  NMR (500 MHz,  $\text{CDCl}_3$ ):  $\delta$  6.77 (d,  $J = 8.5$ , 1H), 6.49 (d,  $J = 8.5$ , 1H), 5.01 (s, 1H), 3.97 (ddd,  $J = 8.8$ , 7.4, 1.6, 1H), 3.47 (ddd,  $J = 11.2$ , 8.8, 5.2, 1H), 2.88 (s, 3H), 2.44 (ddd,  $J = 12.2$ , 5.2, 1.6, 1H), 2.08 (ddd,  $J = 12.2$ , 11.2, 7.4, 1H), 1.53 (s, 3H);  $^{13}\text{C}$  NMR (125 MHz,  $\text{CDCl}_3$ ): 159.2, 148.9, 138.5, 118.9, 109.2, 104.5, 67.9, 53.2, 39.5, 32.3, 22.7; IR (film): 2964, 2926, 2669, 1614, 1488  $\text{cm}^{-1}$ ; HRMS-APCI ( $m/z$ )  $[\text{M} + \text{H}]^+$  calcd for  $\text{C}_{11}\text{H}_{15}\text{N}_2\text{O}_2^+$ , 207.11280; found 207.11227.

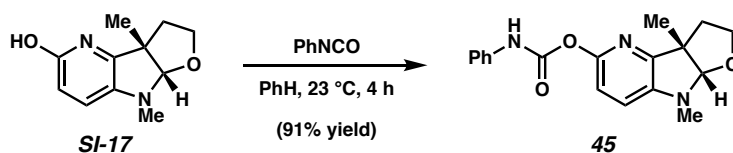

**Aza-phensvenine 45.** A 1-dram vial was charged with a magnetic stir bar, flame-dried under reduced pressure, and allowed to cool under a  $\text{N}_2$  atmosphere. Hydroxyazaindoline **SI-17** (5.0 mg, 0.024 mmol, 1.0 equiv) was added and the vial was flushed with  $\text{N}_2$  for 5 min. The vial was then charged with a stock solution of PhNCO (1.7  $\mu\text{L}$ , 0.022 mmol, 1.5 equiv) in PhH (200  $\mu\text{L}$ , 0.075 M), and the reaction mixture was allowed to stir at 23 °C under an  $\text{N}_2$  atmosphere. After 4 h, the volatiles were removed under reduced pressure to yield aza-phensvenine **45** (7.2 mg, 91% yield) as an amorphous solid. Aza-phensvenine **45**:  $R_f$  0.40 (1:1 Hexanes:EtOAc);  $^1\text{H}$  NMR (500 MHz,  $\text{C}_6\text{D}_6$ ):  $\delta$  7.27 (d,  $J = 8.0$ , 2H), 7.05–7.02 (m, 2H), 6.83–6.80 (m, 1H), 6.77 (d,  $J = 8.1$ , 1H), 6.61 (br. s, 1H), 6.13 (d,  $J = 8.1$ , 1H), 4.86 (s, 1H), 3.65 (ddd,  $J = 8.9$ , 7.6, 1.6, 1H), 3.25 (ddd,  $J = 11.2$ , 8.9, 5.4, 1H), 2.52 (s, 3H), 2.26 (ddd,  $J = 12.2$ , 5.4, 1.6, 1H), 1.67 (ddd,  $J = 12.2$ , 11.2, 7.6, 1H), 1.32 (s, 3H);  $^{13}\text{C}$  NMR (125 MHz,  $\text{C}_6\text{D}_6$ ): 154.0, 152.0, 150.6, 143.5, 138.4, 129.1, 123.7, 119.0, 114.9, 113.0, 103.9, 67.4, 53.2, 40.2, 30.8, 22.7; IR (film): 3281, 2926, 1746, 1646, 1597  $\text{cm}^{-1}$ ; HRMS-APCI ( $m/z$ )  $[\text{M} + \text{H}]^+$  calcd for  $\text{C}_{18}\text{H}_{20}\text{N}_3\text{O}_3^+$ , 326.14992; found 326.14895.

### D. Synthesis of an Aza-Analogue of Aspidophylline A

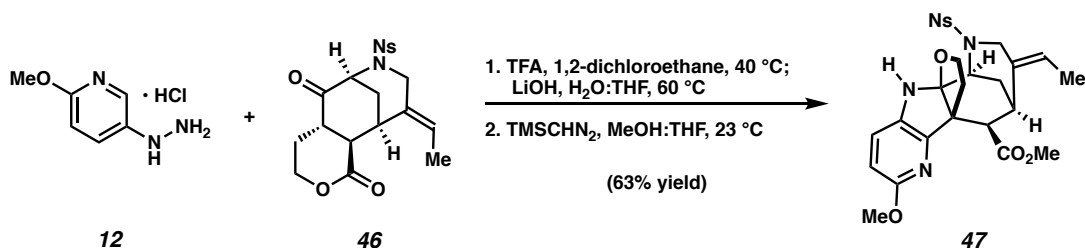

**Aza-furoindoline 47.** A 1-dram vial was charged with a magnetic stir bar, flame-dried under reduced pressure, and allowed to cool under a  $\text{N}_2$  atmosphere. Ketolactone **46** (10.0 mg, 0.0238 mmol, 1.0 equiv) was added and suspended in 1,2-dichloroethane (1.0 mL, 0.020 M). Hydrazine **12** (35.0 mg, 0.119 mmol, 5.0 equiv) and TFA (10.0  $\mu\text{L}$ , 0.119 mmol, 5.0 equiv) were added to the reaction vial. The mixture was degassed via the freeze-pump-thaw method using a  $-78^\circ\text{C}$  dry ice/acetone bath. After warming to  $23^\circ\text{C}$ , the reaction vessel was placed into a pre-heated  $80^\circ\text{C}$  aluminum heating block and allowed to stir for 12 h. After cooling to room temperature, the reaction mixture was filtered over  $\text{Na}_2\text{SO}_4$ , washed with  $\text{CH}_2\text{Cl}_2$  (10 mL), and concentrated under reduced pressure. The resultant residue was suspended in 1:1 THF/ $\text{H}_2\text{O}$  (1.0 mL, 0.02 M) in a 1-dram vial. LiOH (5.0 mg, 0.230 mmol, 10.0 equiv) was added and the reaction vessel was placed into a pre-heated  $60^\circ\text{C}$  aluminum heating block. Upon stirring for 2 h at  $60^\circ\text{C}$ , the reaction was cooled to  $23^\circ\text{C}$ . The layers were separated and the aqueous layer was extracted with  $\text{CH}_2\text{Cl}_2$  (4 x 2 mL). The organic layers were combined, dried over  $\text{Na}_2\text{SO}_4$ , and concentrated under reduced pressure. The resultant residue was suspended in 1:1 THF/MeOH (1.0 mL, 0.02 M) in a 1-dram vial. TMSCHN<sub>2</sub> (77.0  $\mu\text{L}$ , 0.046 mmol, 2.0 equiv) was added and the resultant solution stirred at room temperature. Upon stirring for 1.5 h, the reaction was diluted with 2 mL of  $\text{H}_2\text{O}$  and the layers were separated. The aqueous layer was extracted with EtOAc (4 x 2 mL). The organic layers were combined, dried over  $\text{Na}_2\text{SO}_4$ , and then concentrated under reduced pressure. The crude residue was purified by flash chromatography (9:1 Hexanes:EtOAc  $\rightarrow$  7:3 Hexanes:EtOAc) to afford aza-furoindoline **47** (8.0 mg, 63% yield) as a yellow oil. Aza-furoindoline **47**:  $R_f$  0.50 (1:1 Hexanes:EtOAc);  $^1\text{H}$  NMR (500 MHz,  $\text{CDCl}_3$ ):  $\delta$  8.07–8.03 (m, 1H), 7.69–7.61 (m, 3H), 6.88 (d,  $J = 8.5$ , 1H), 6.44 (d,  $J = 8.2$ , 1H), 5.53 (q,  $J = 7.0$ , 1H), 4.38 (br. s, 1H), 4.04 (d,  $J = 15.0$ , 1H), 3.93 (d,  $J = 15.0$ , 1H), 3.78 (br. s, 4H), 3.67 (s, 3H), 3.35–3.28 (m, 1H), 3.21 (q,  $J = 3.8$ , 1H), 3.08–3.00 (m, 1H), 2.90 (d,  $J = 4.8$ , 1H), 2.47 (dd,  $J = 13.6$ , 5.6, 1H), 2.06 (dt,  $J = 13.5$ , 3.7, 1H), 1.96 (dt,  $J = 13.3$ , 2.6, 1H), 1.52 (dd,  $J = 6.9$ , 1.8, 3H);  $^{13}\text{C}$

NMR (125 MHz, CDCl<sub>3</sub>): 171.8, 159.8, 151.2, 148.1, 134.4, 134.0, 133.1, 131.5, 131.1, 129.5, 125.0, 124.4, 120.4, 108.9, 100.8, 68.5, 54.4, 54.2, 53.4, 52.0, 51.7, 48.5, 34.4, 31.2, 30.1, 12.7; IR (film): 3360, 2950, 2872, 1742, 1163 cm<sup>-1</sup>; HRMS-APCI (*m/z*) [M + H]<sup>+</sup> calcd for C<sub>26</sub>H<sub>29</sub>N<sub>4</sub>O<sub>8</sub>S<sup>+</sup>, 557.17006; found 557.16905; [α]<sub>D</sub><sup>25.9</sup> -165.33° (c = 0.1, CH<sub>2</sub>Cl<sub>2</sub>).

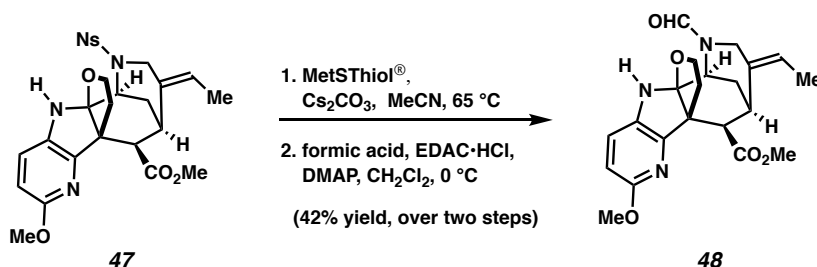

**(-)-10-Methoxy-9-aza-aspidophylline A (48).** To a 1-dram vial, a suspension of aza-furoindoline **47** (10.0 mg, 0.017 mmol, 1.0 equiv) and Cs<sub>2</sub>CO<sub>3</sub> (18.0 mg, 0.0539 mmol, 3.0 equiv) in MeCN (1.0 mL, 0.02 M) was added MetSThioI<sup>®</sup> (58.0 mg, 0.0718 mmol, 4.0 equiv). The reaction vessel was placed in an aluminum block and heated to 65 °C. After stirring for 12 h, the reaction was cooled to 23 °C and filtered through a plug of celite (100 mg) and washed with 10 mL of MeCN. The filtrate was concentrated under reduced pressure to afford the corresponding secondary amine, which was used subsequently without further purification.

In a 20 mL scintillation vial, HCOOH (9.6 μL, 0.255 mmol, 15.0 equiv) was added to a solution of DMAP (44 mg, 0.358 mmol, 20.0 equiv) and EDAC·HCl (34 mg, 0.179 mmol, 10.0 equiv) in CH<sub>2</sub>Cl<sub>2</sub> (3.8 mL, 0.005 M) at 0 °C. This mixture was stirred at 0 °C for 15 min, at which point a 400 μL aliquot of this stock solution was added to the crude denosylated product in a 1-dram vial equipped with a magnetic stir bar. The reaction mixture was cooled to 0 °C and stirred for 1.5 h. The reaction mixture was then quenched with saturated aqueous NaHCO<sub>3</sub> (2 mL). The layers were separated and the aqueous layer was extracted with CH<sub>2</sub>Cl<sub>2</sub> (4 x 2 mL). The organic layers were combined, dried over Na<sub>2</sub>SO<sub>4</sub>, and concentrated under reduced pressure. The crude mixture was purified via flash chromatography (1:1 Hexanes:EtOAc → 1:9 Hexanes:EtOAc) to afford (-)-10-methoxy-9-aza-aspidophylline A (**48**) as a colorless oil (3.0 mg, 42% yield). (-)-10-methoxy-9-aza-aspidophylline A (**48**) was observed as a 5:1 mixture of rotational isomers in CDCl<sub>3</sub>. (-)-10-methoxy-9-aza-aspidophylline A (**48**) (**Major rotational isomer**): R<sub>f</sub> 0.27 (1:9 Hexanes:EtOAc); <sup>1</sup>H NMR (500 MHz, CDCl<sub>3</sub>): δ 8.12 (s, 1H), 6.95 (d, *J* = 8.5, 1H), 6.49 (d, *J* = 8.5, 1H), 5.62 (q, *J* = 6.8, 1H), 4.38 (d, *J* = 18.0, 1H), 4.01–3.96 (m, 2H),

3.85 (t,  $J = 3.0$ , 1H), 3.80 (s, 3H), 3.70 (d,  $J = 3.2$ , 1H), 3.69 (s, 3H), 3.55–3.47 (m, 1H), 3.31 (q,  $J = 4.1$ , 1H), 2.95–2.86 (m, 1H), 2.82 (d,  $J = 4.8$ , 1H), 2.67 (dd,  $J = 13.6, 5.6$ , 1H), 2.10 (dt,  $J = 13.3, 2.7$ , 1H), 2.00 (dt,  $J = 13.5, 3.8$ , 1H), 1.54 (br. s, 3H);  $^{13}\text{C}$  NMR (125 MHz,  $\text{CDCl}_3$ ): 171.6, 164.3, 160.1, 151.6, 134.1, 129.1, 124.3, 121.4, 109.7, 101.2, 69.2, 54.3, 54.2, 53.5, 52.0, 51.8, 44.6, 33.2, 30.8, 30.4, 12.9; IR (film): 3318, 2927, 2862, 1744, 1421  $\text{cm}^{-1}$ ; HRMS-APCI ( $m/z$ )  $[\text{M} + \text{H}]^+$  calcd for  $\text{C}_{21}\text{H}_{26}\text{N}_3\text{O}_5^+$ , 400.18670; found 400.18560;  $[\alpha]^{28.5}_{\text{D}} -4.00^\circ$  ( $c = 0.1$ ,  $\text{CH}_2\text{Cl}_2$ ).

## References

- <sup>1</sup> Boal, B. W.; Schammel, A. W.; Garg, N. K. *Org. Lett.* **2009**, *11*, 3458–3461.
- <sup>2</sup> Schammel, A. W.; Boal, B. W.; Zu, L.; Mesganaw, T.; Garg, N. K. *Tetrahedron* **2010**, *66*, 4687–4695.
- <sup>3</sup> Moreno, J.; Picazo, E.; Morrill, L. A.; Smith, J. M.; Garg, N. K. *J. Am. Chem. Soc.* **2016**, *138*, 1162–1165.

# **<sup>1</sup>H NMR Spectra**

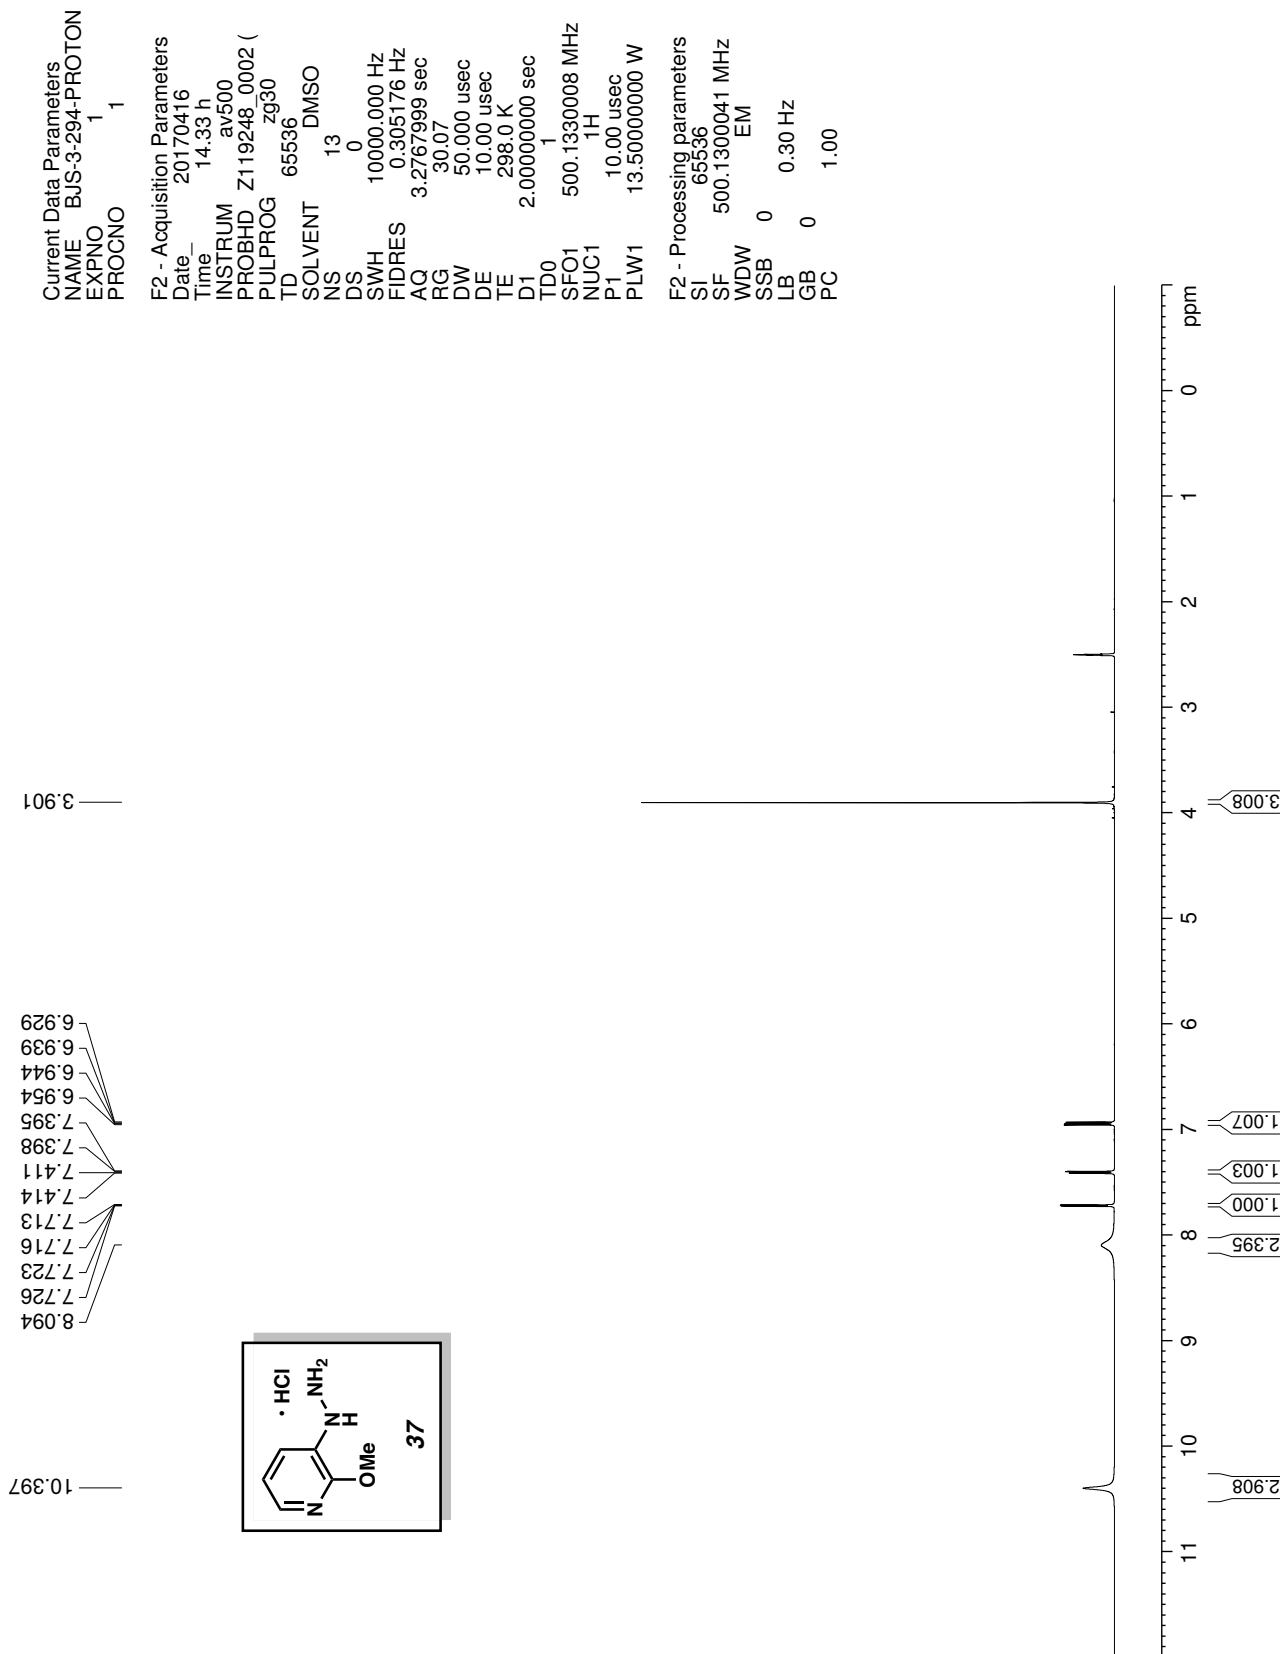

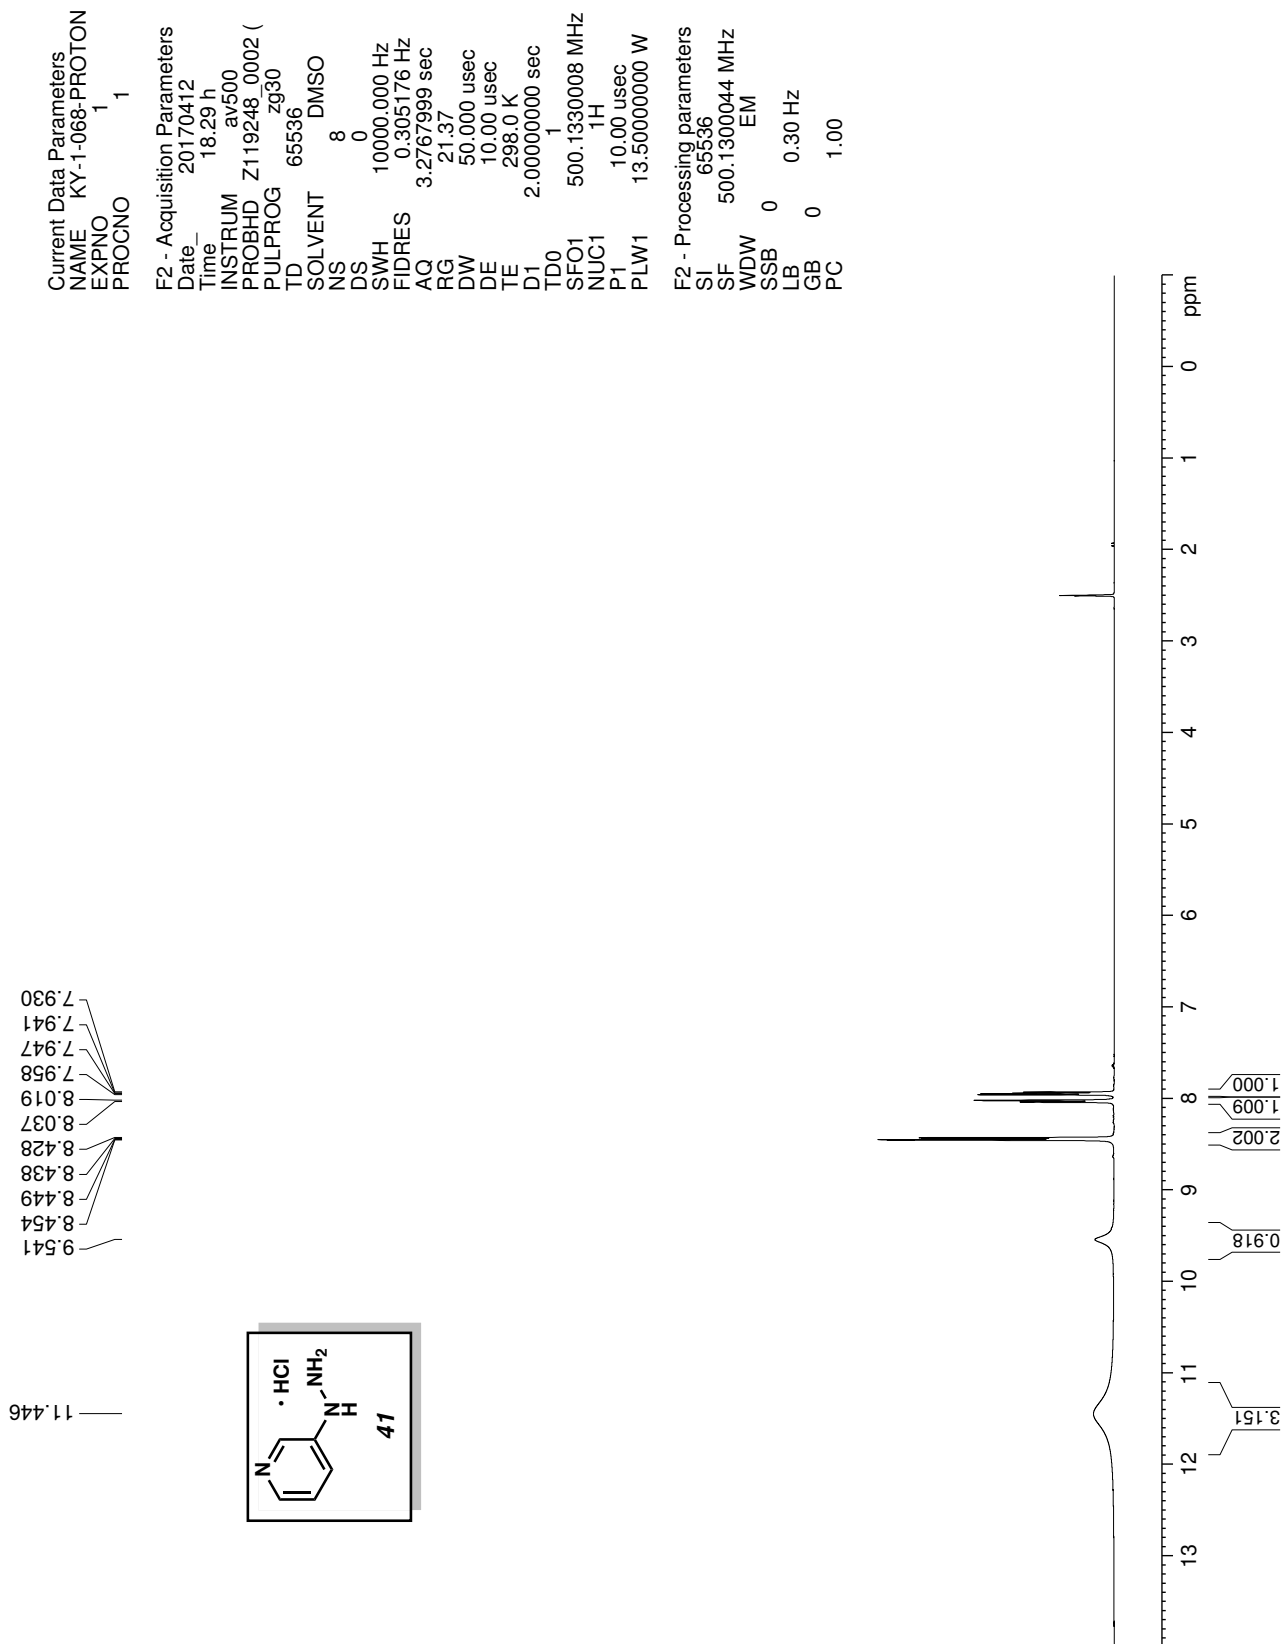

Current Data Parameters  
 NAME BJS-4-045-CRUDE  
 EXPNO 1  
 PROCNO 1

F2 - Acquisition Parameters  
 Date\_ 20170109  
 Time\_ 11.13 h  
 INSTRUM av500  
 PROBHD Z119248.0002 (z930)  
 PULPROG zg30  
 TD 65536  
 SOLVENT DMSO  
 NS 8  
 DS 0  
 SWH 10000.000 Hz  
 FIDRES 0.305176 Hz  
 AQ 3.2767999 sec  
 RG 12.14  
 DW 50.000 usec  
 DE 10.00 usec  
 TE 298.0 K  
 D1 2.00000000 sec  
 TD0 1  
 SFO1 500.1330008 MHz  
 NUC1 1H  
 P1 10.00 usec  
 PLW1 13.50000000 W

F2 - Processing parameters  
 SI 65536  
 SF 500.1300039 MHz  
 WDW EM  
 SSB 0  
 LB 0.30 Hz  
 GB 0  
 PC 1.00

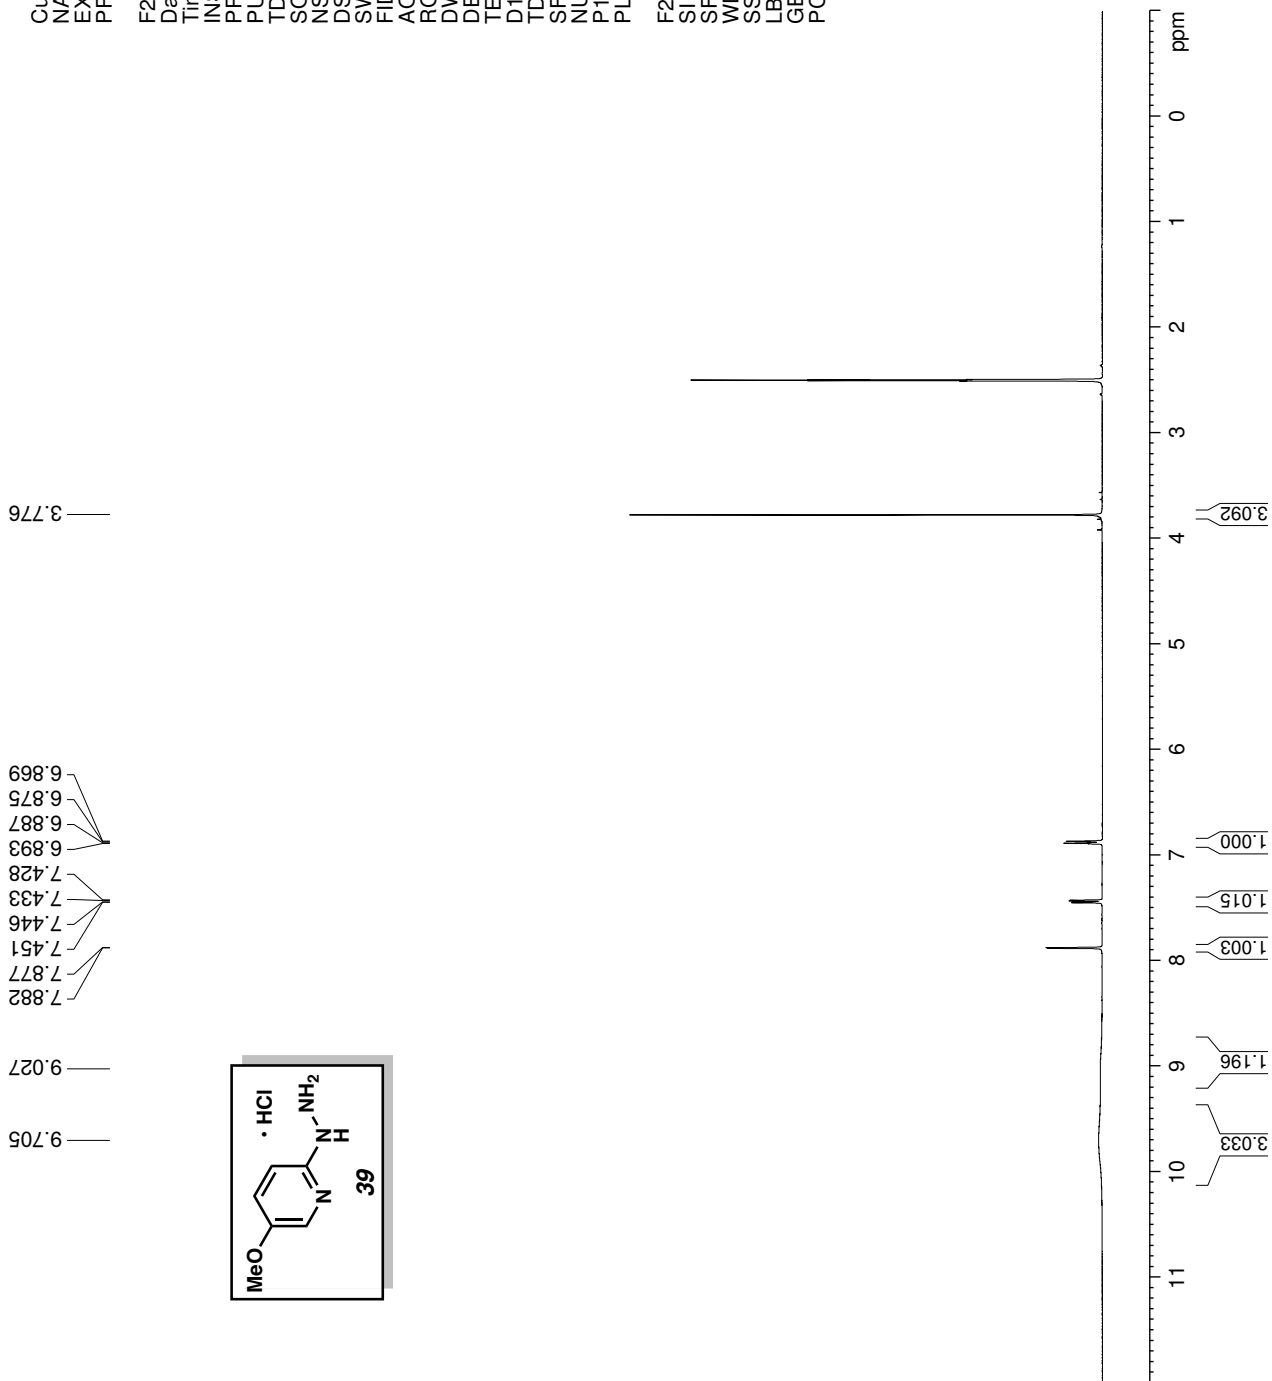



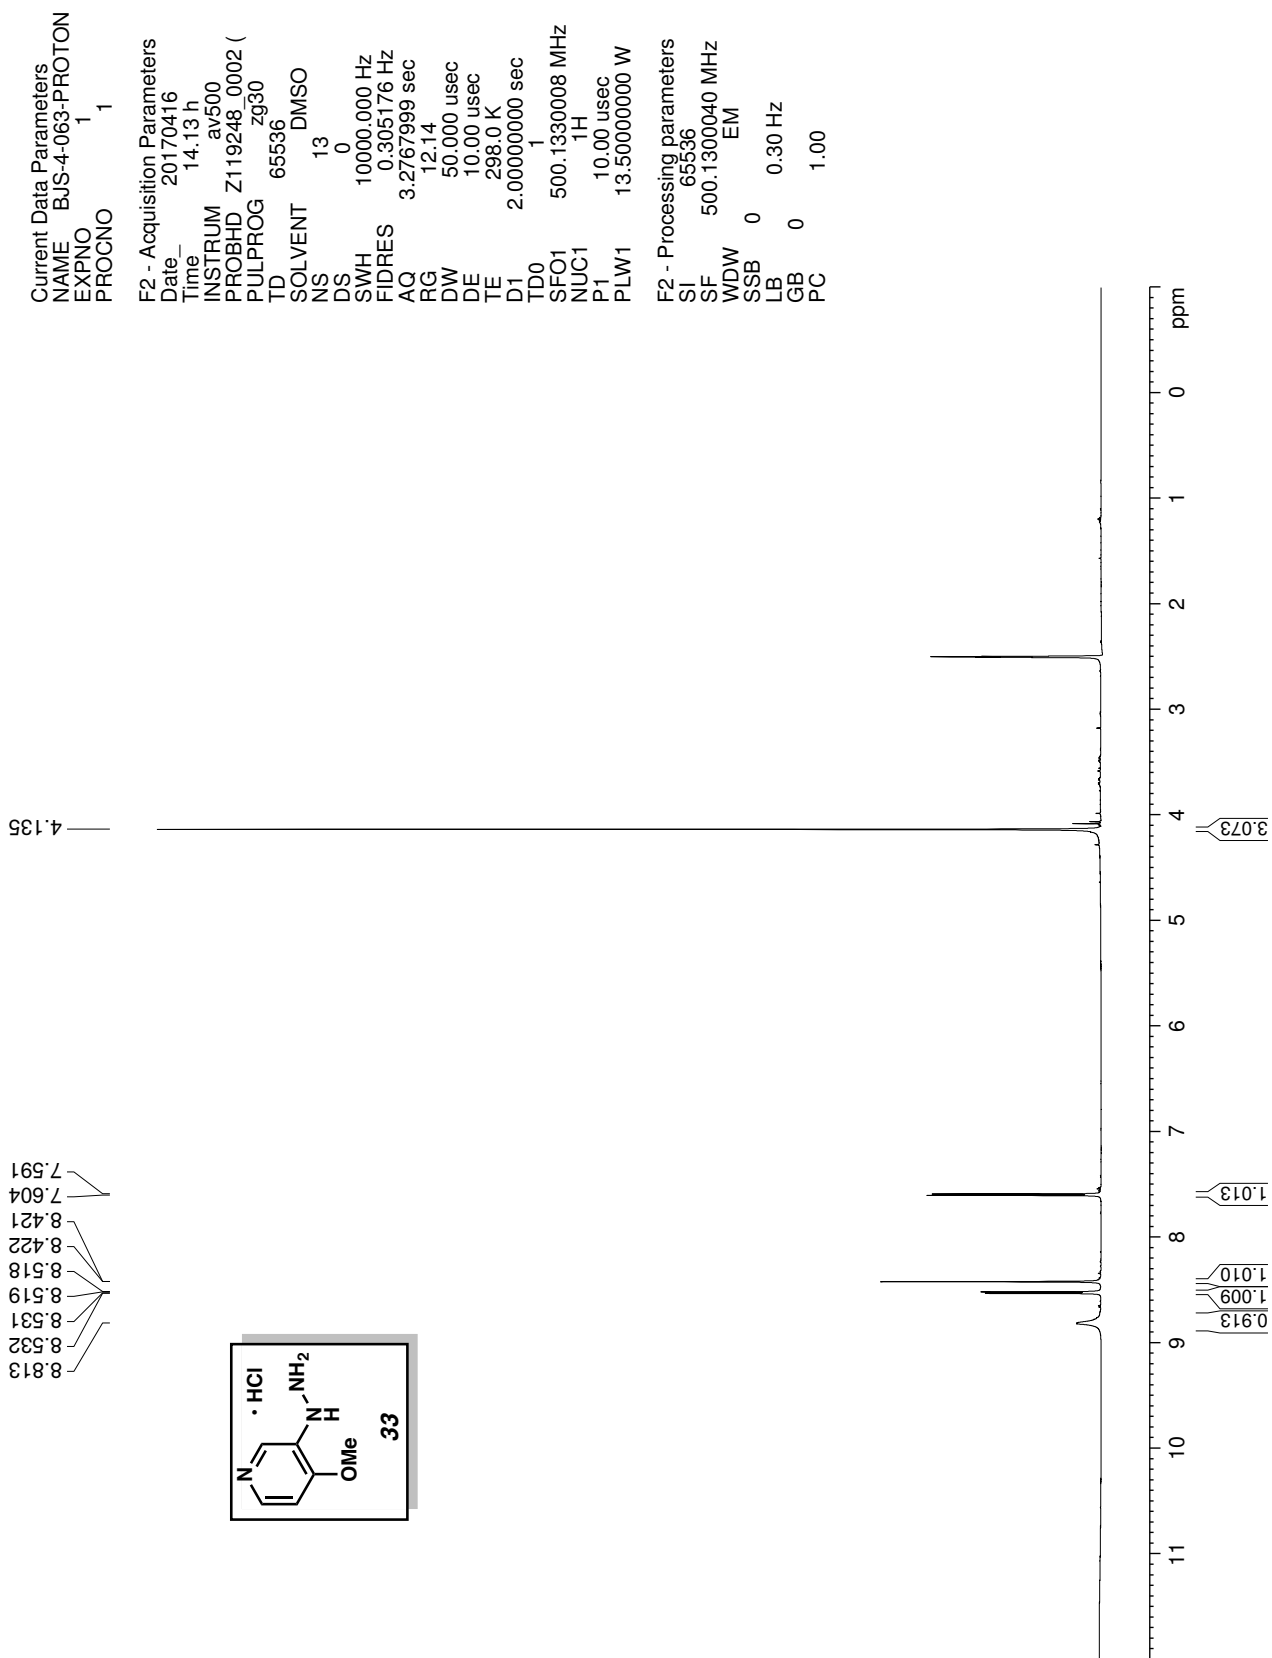

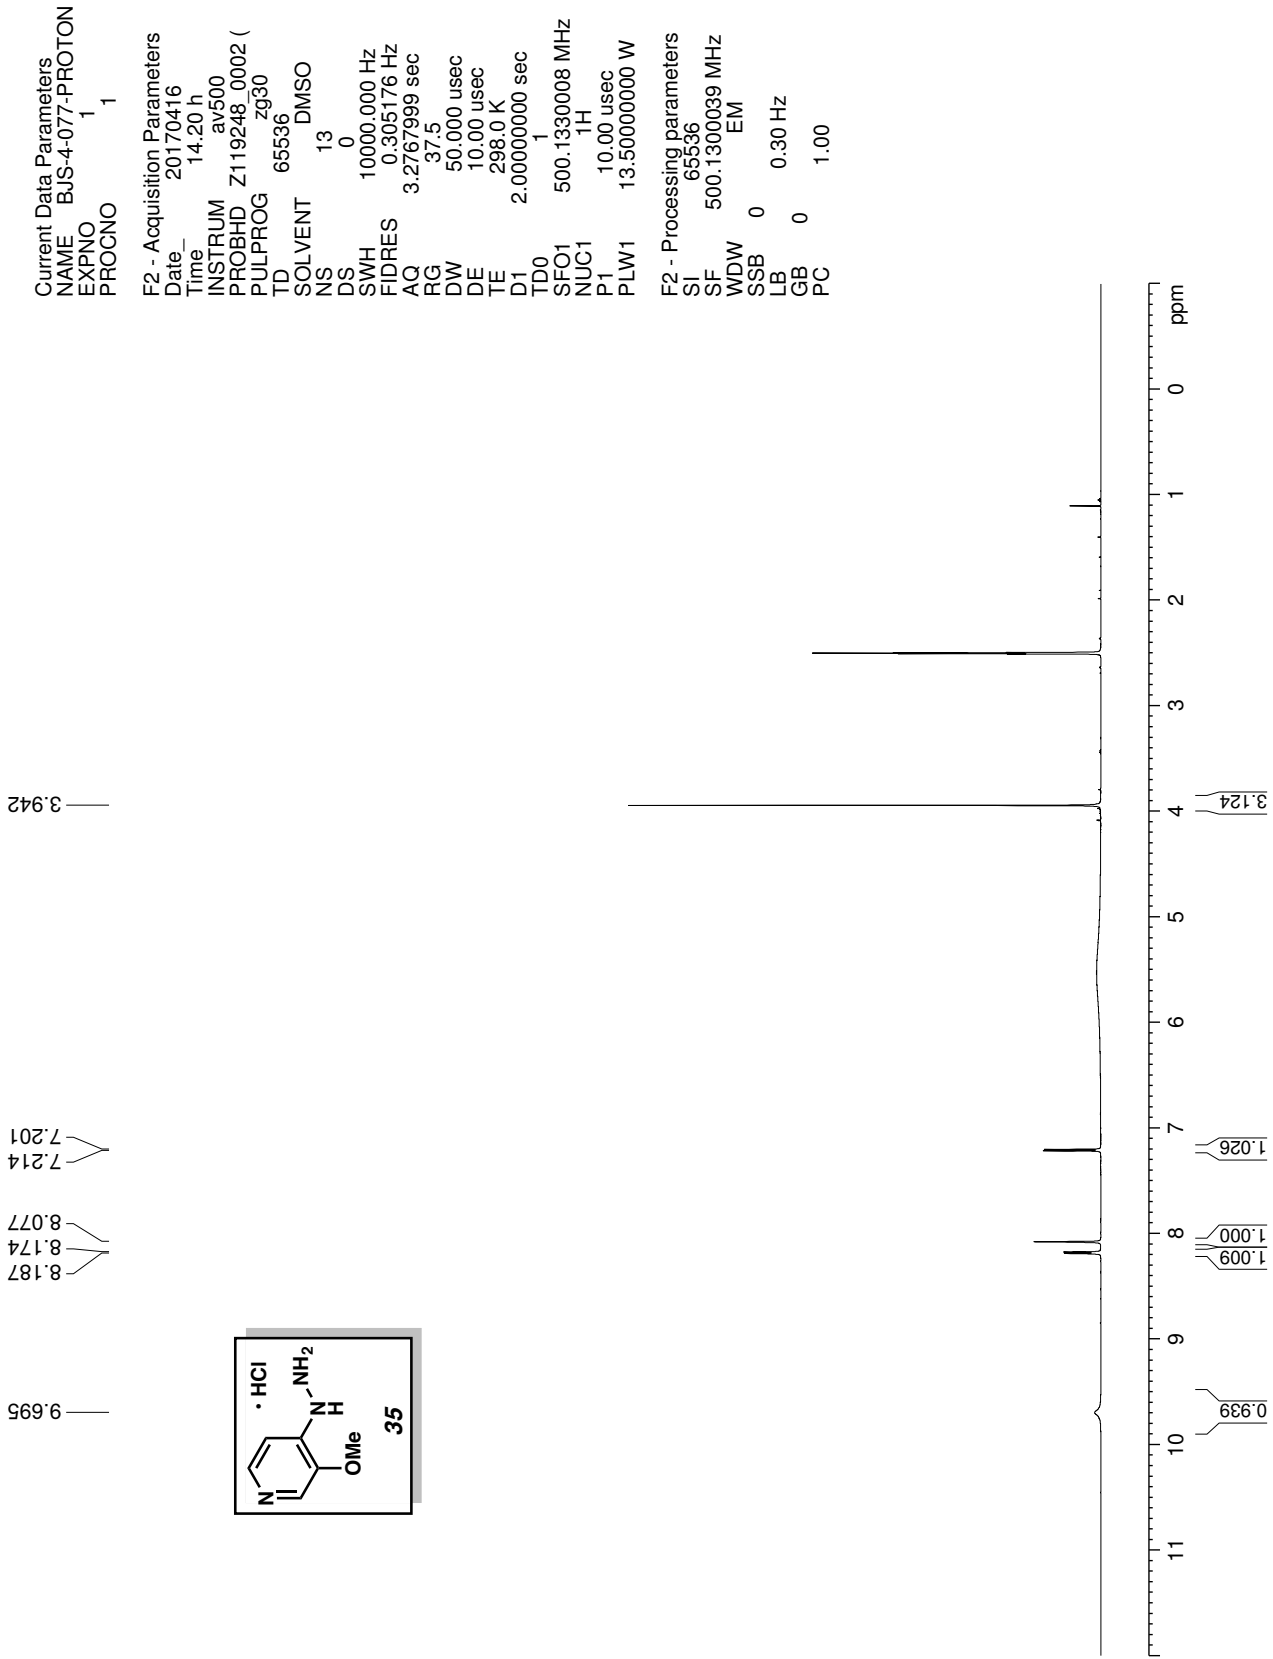

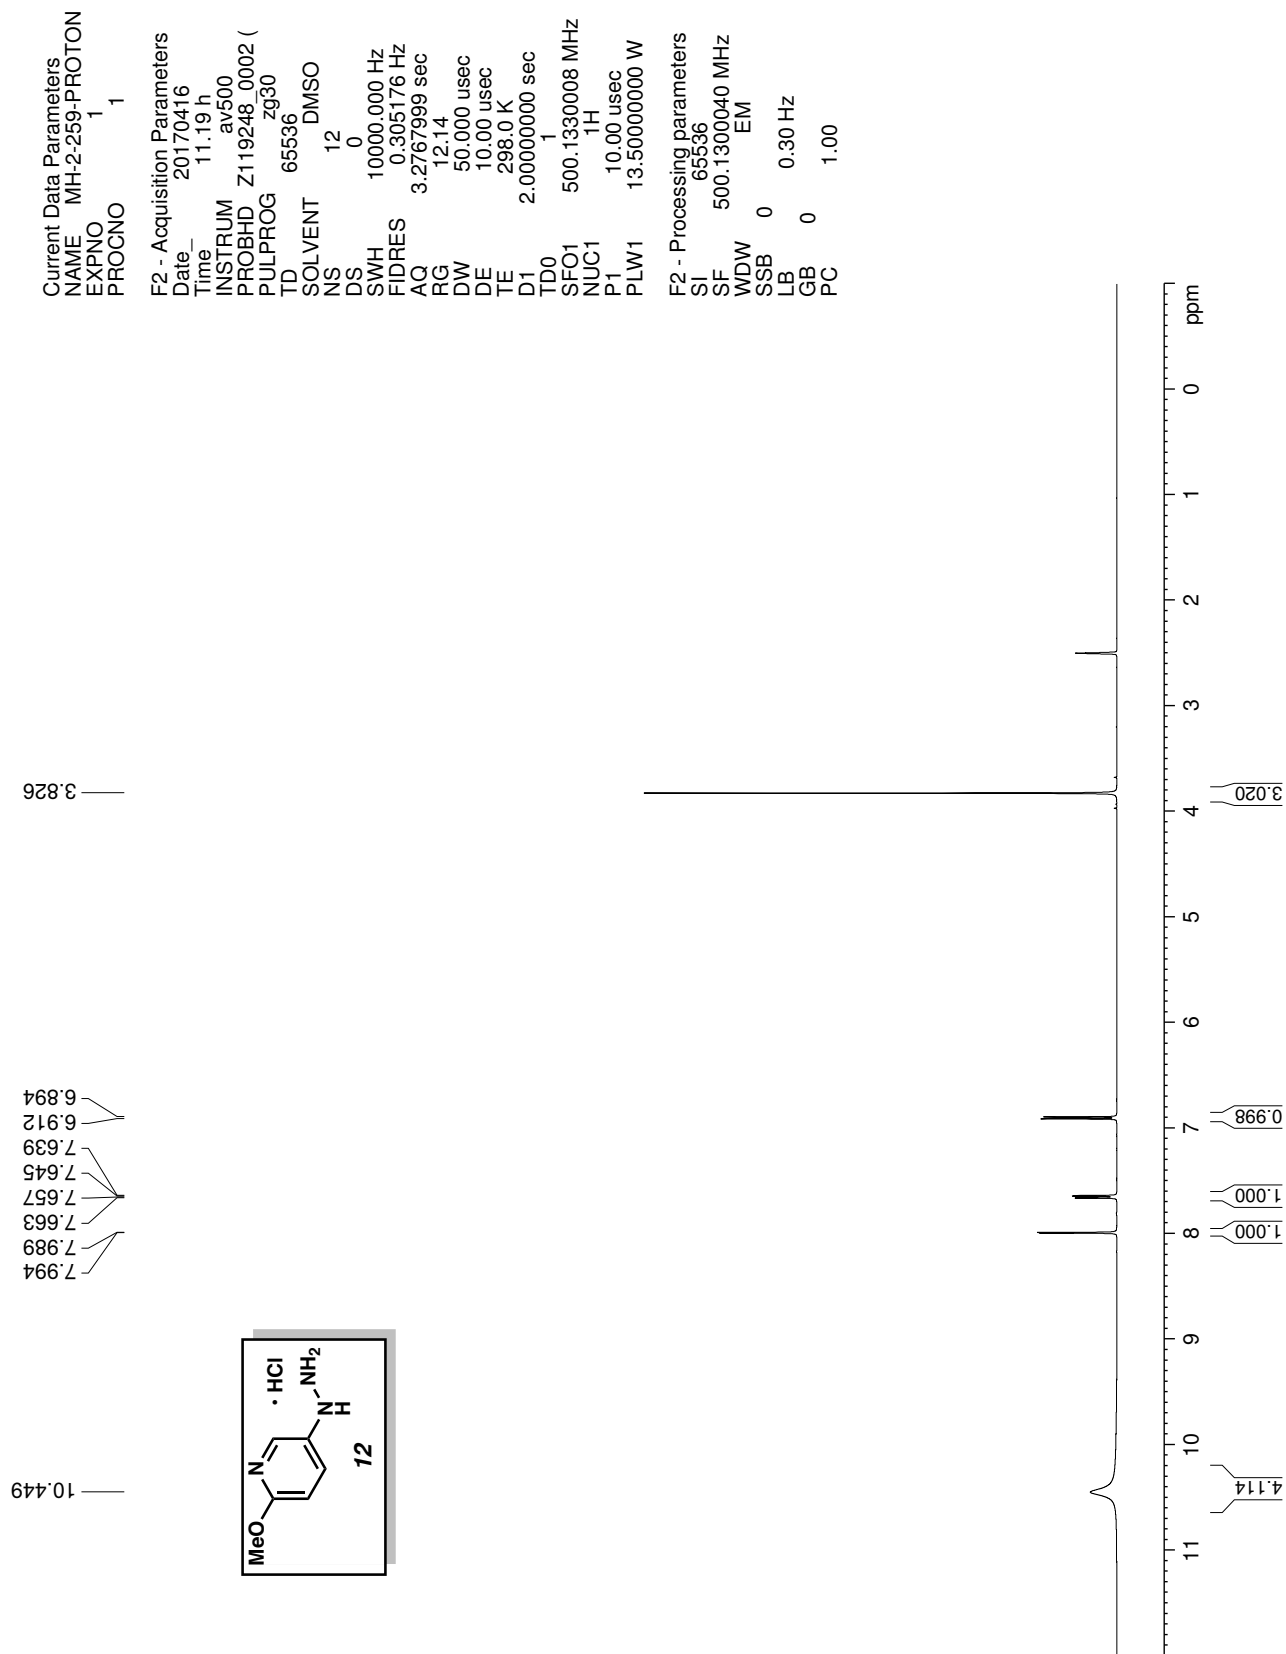

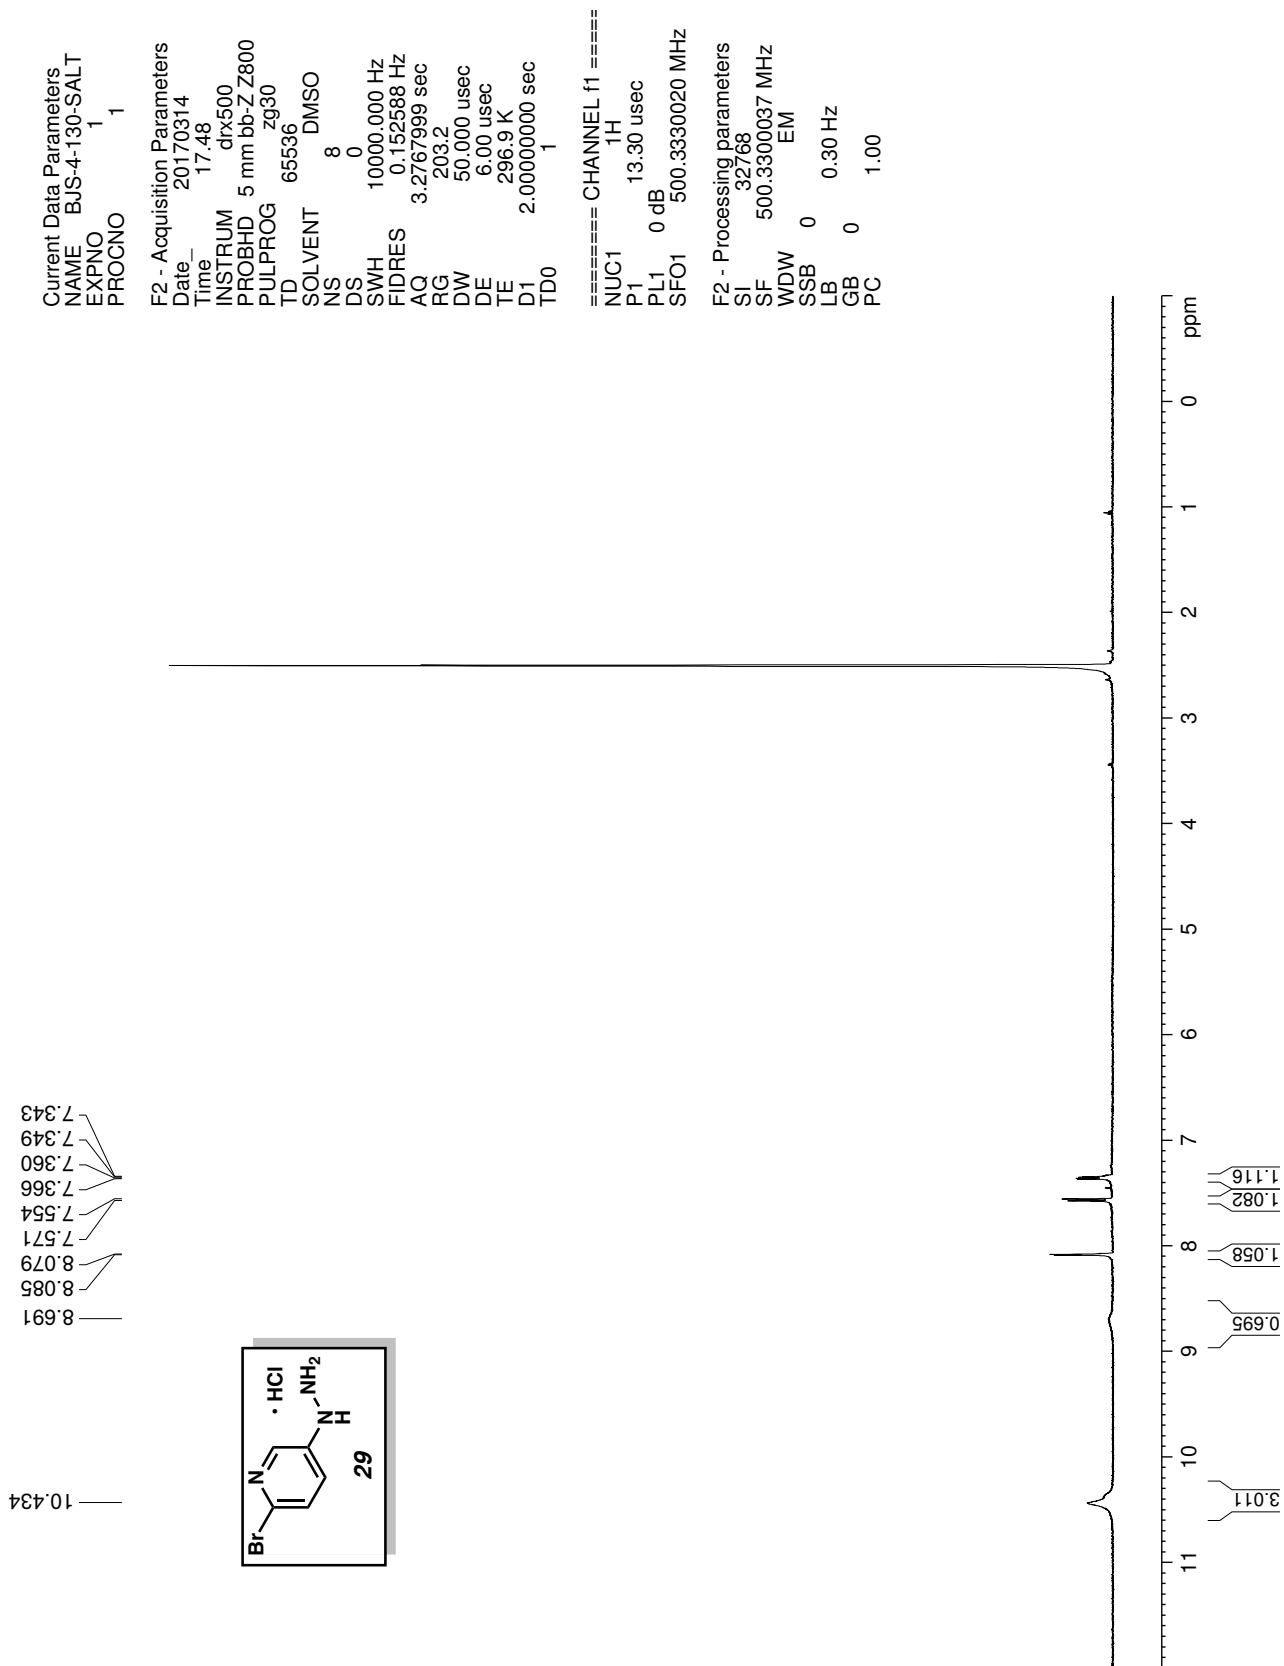

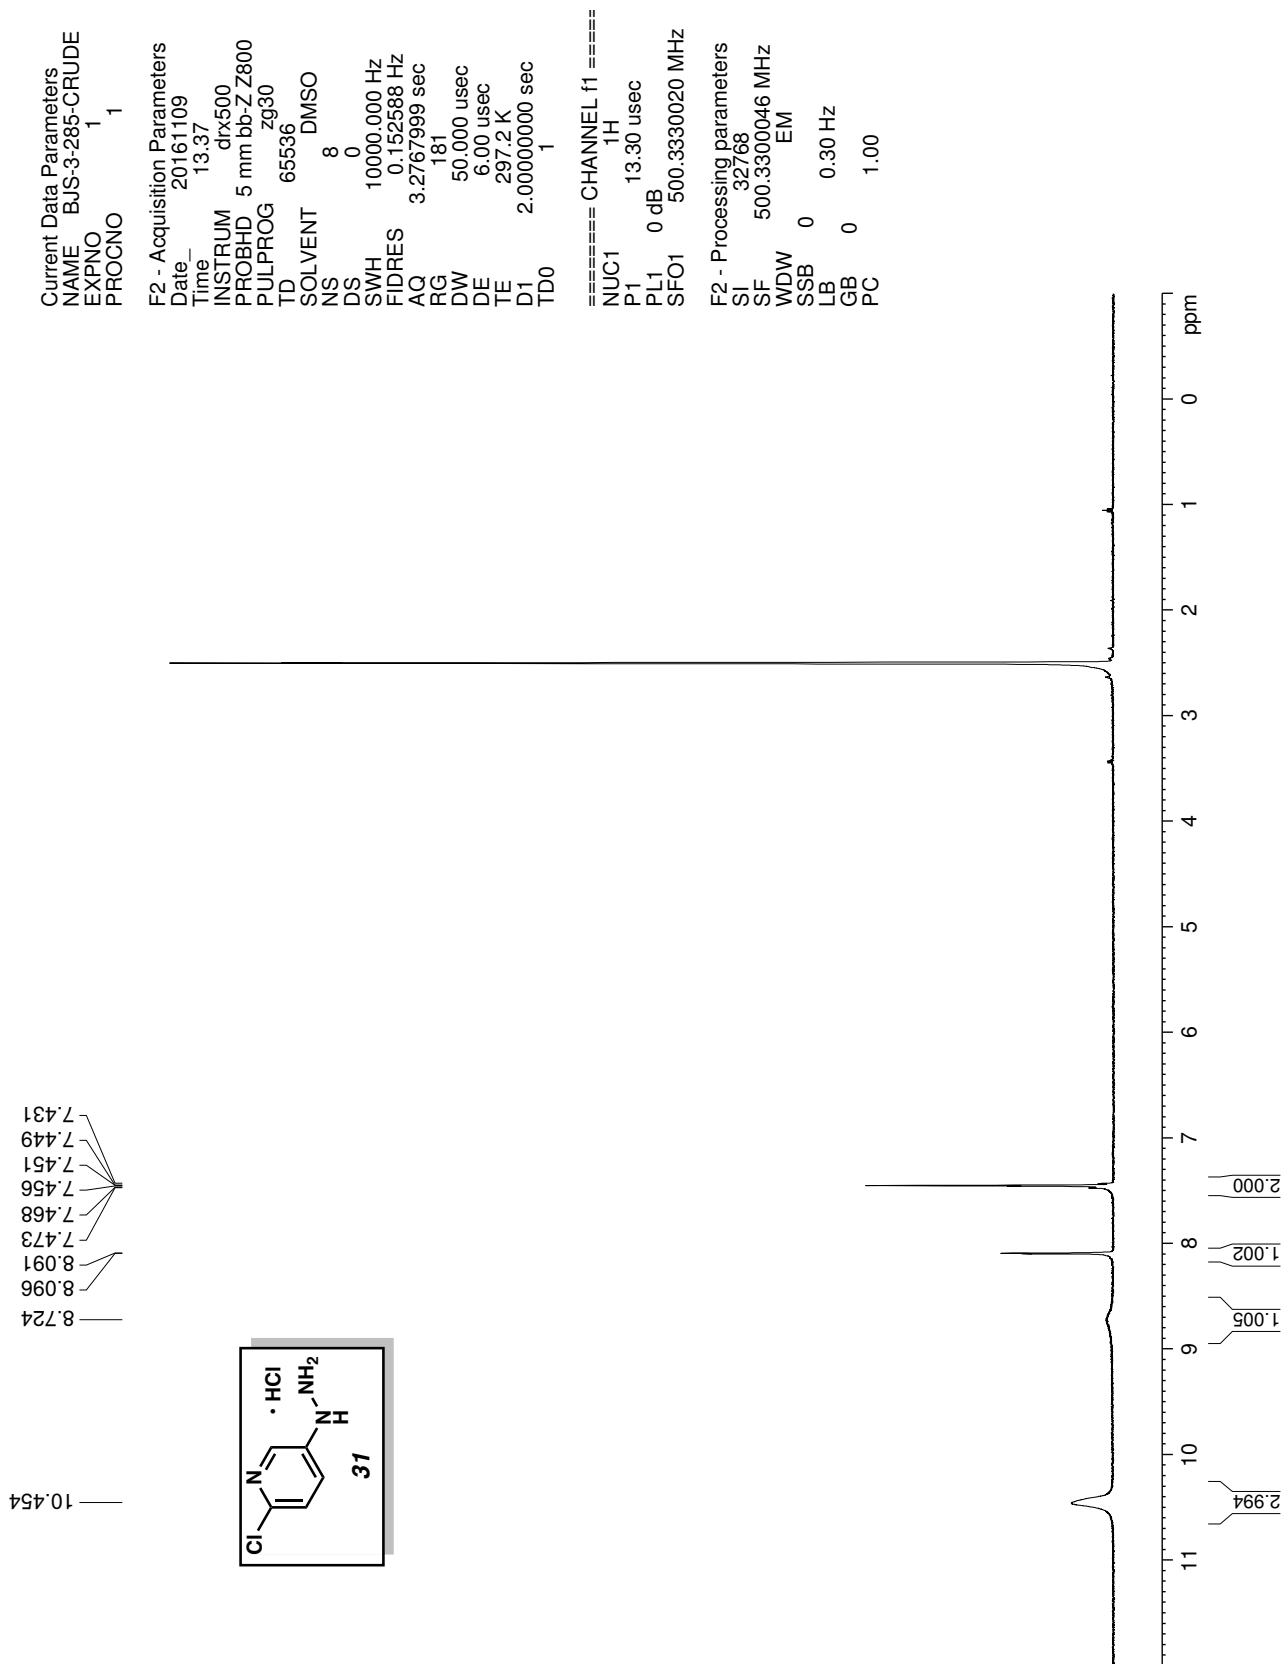

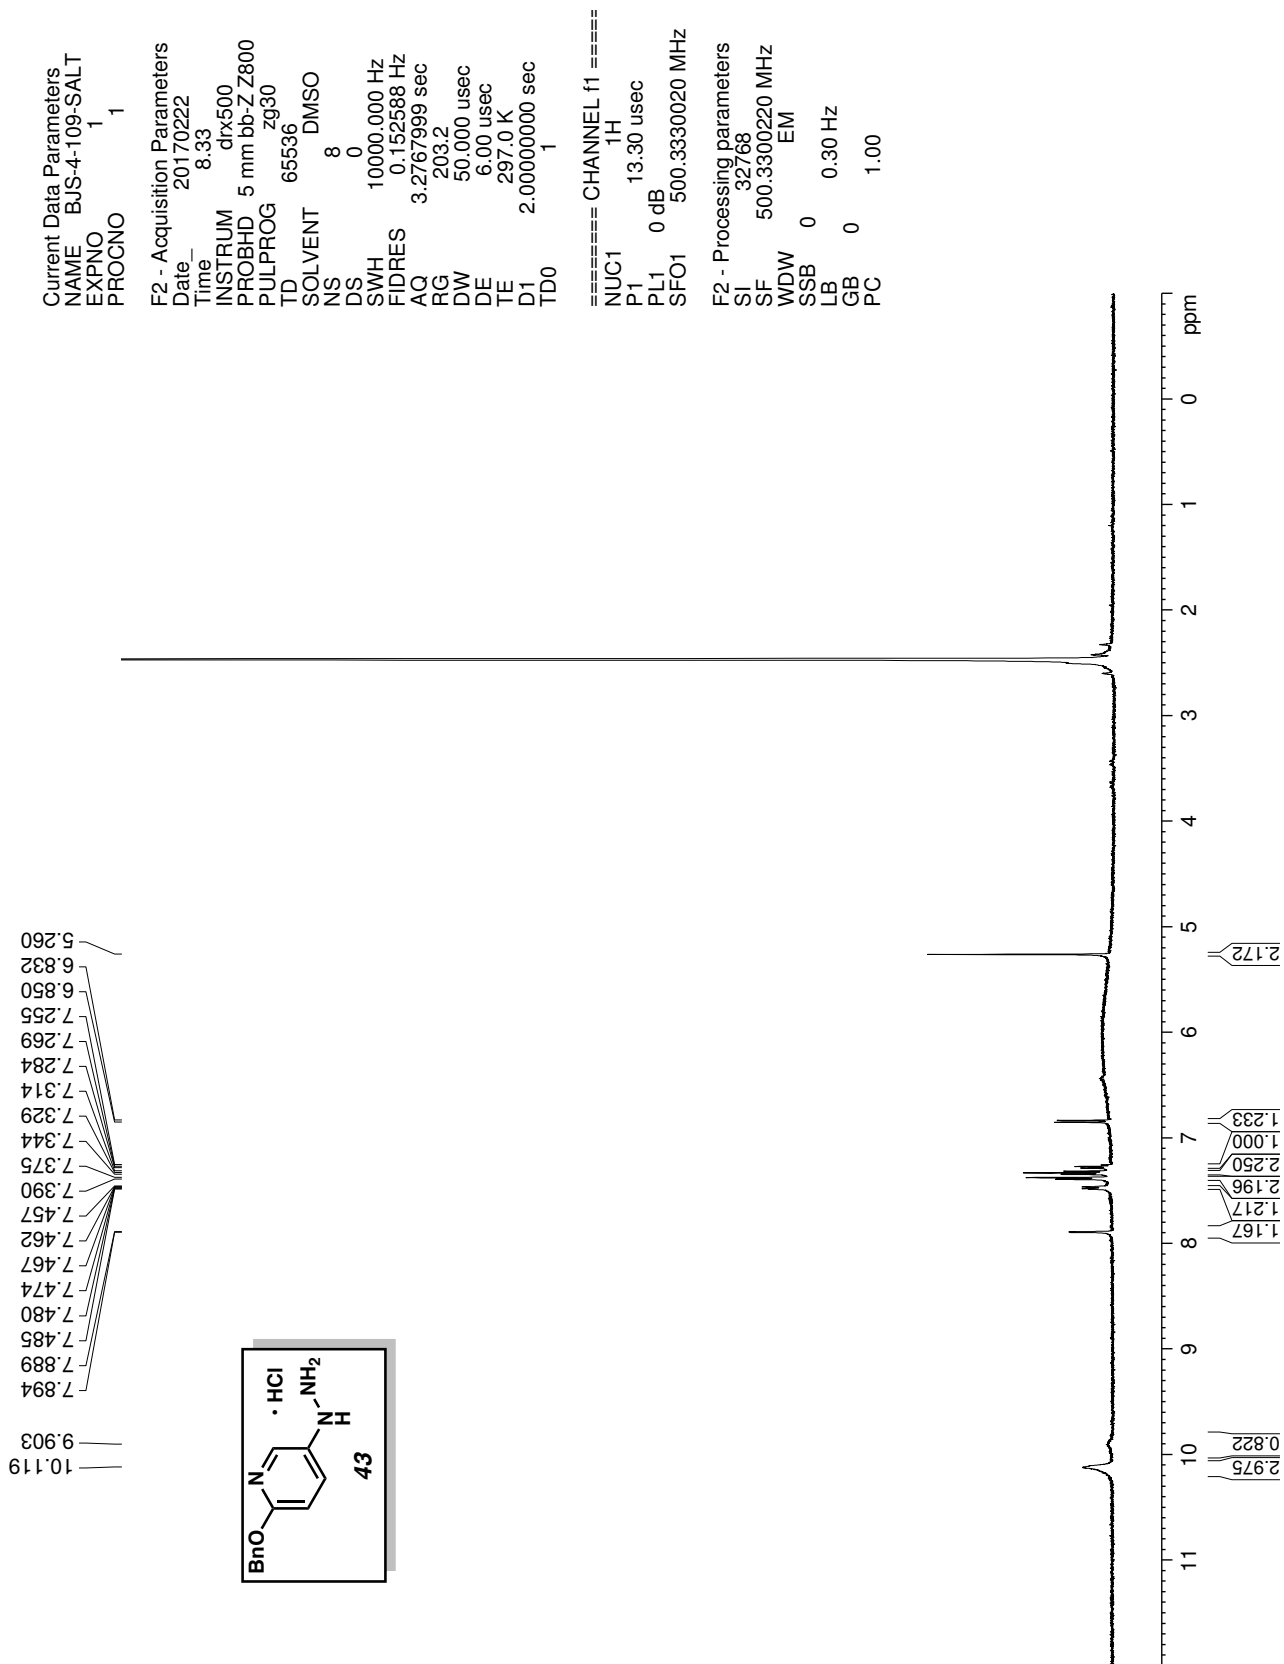

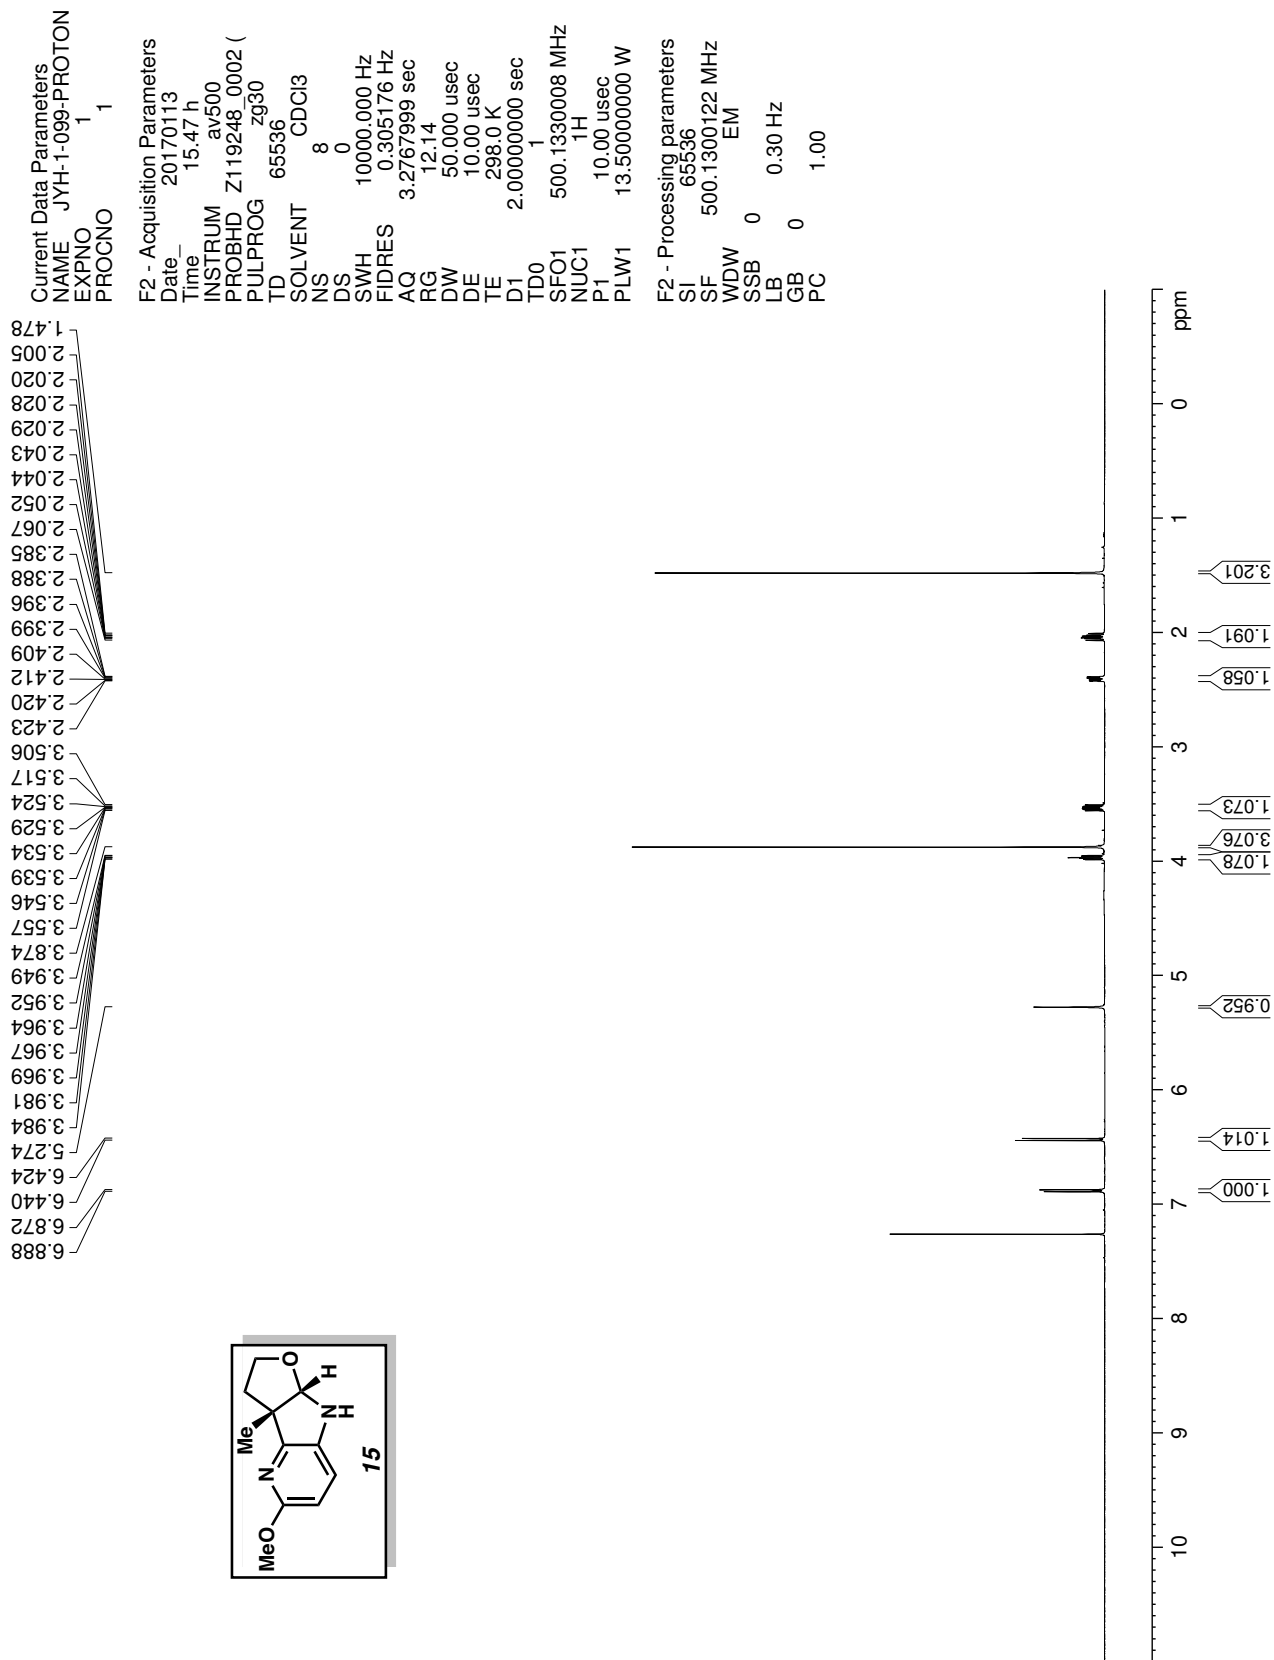

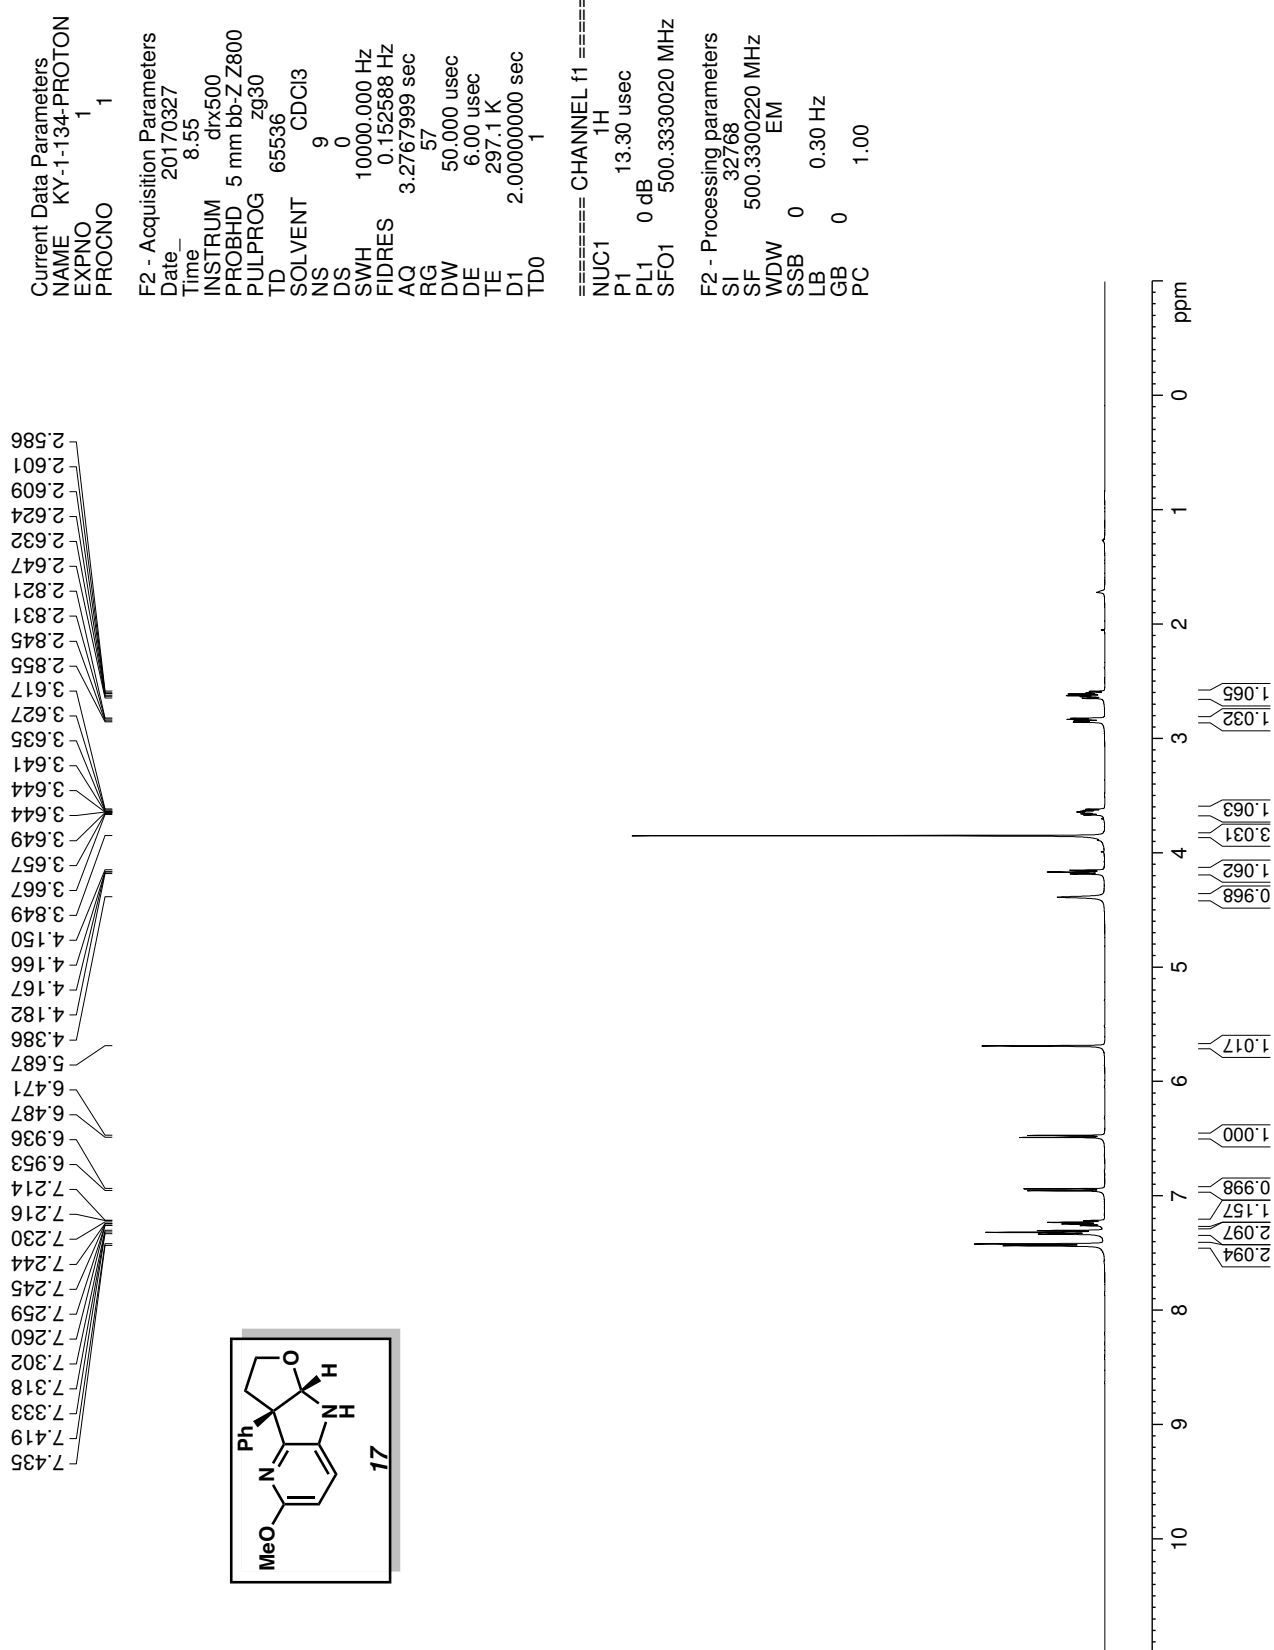



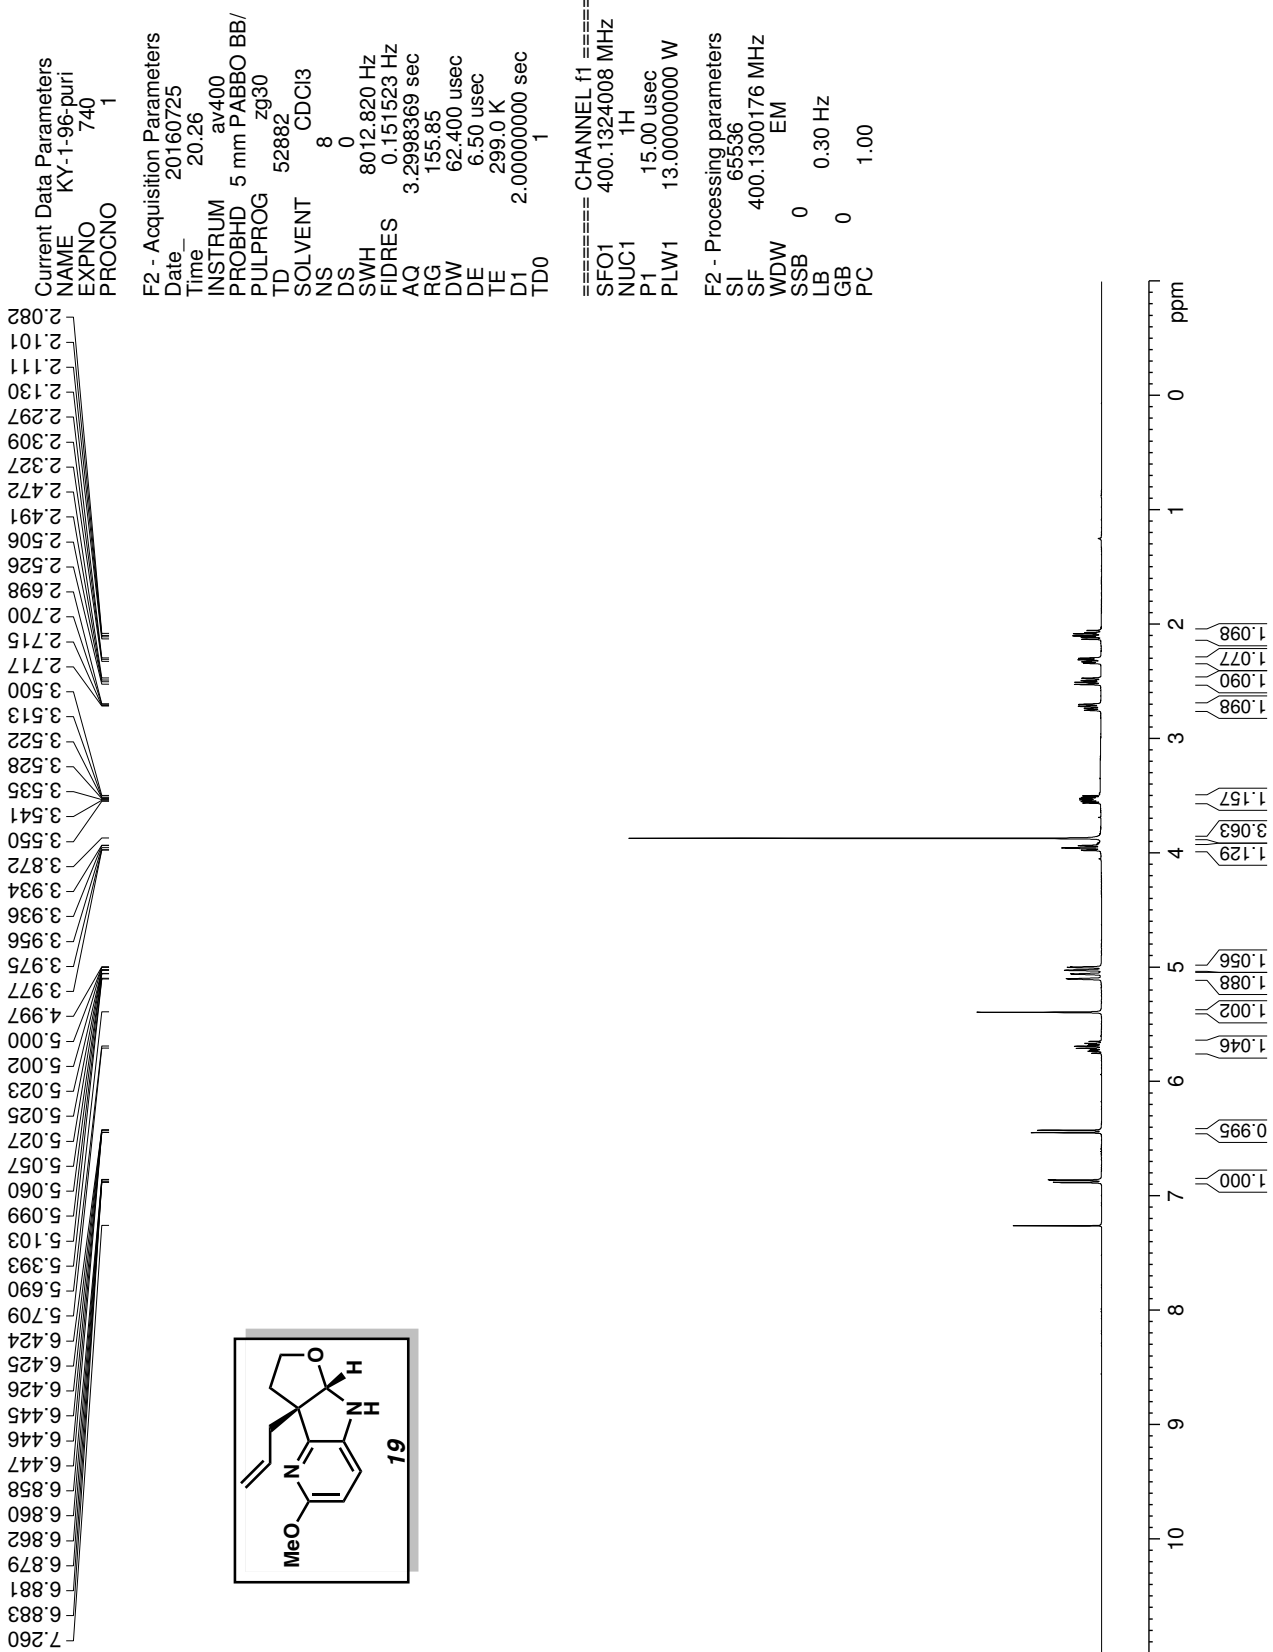

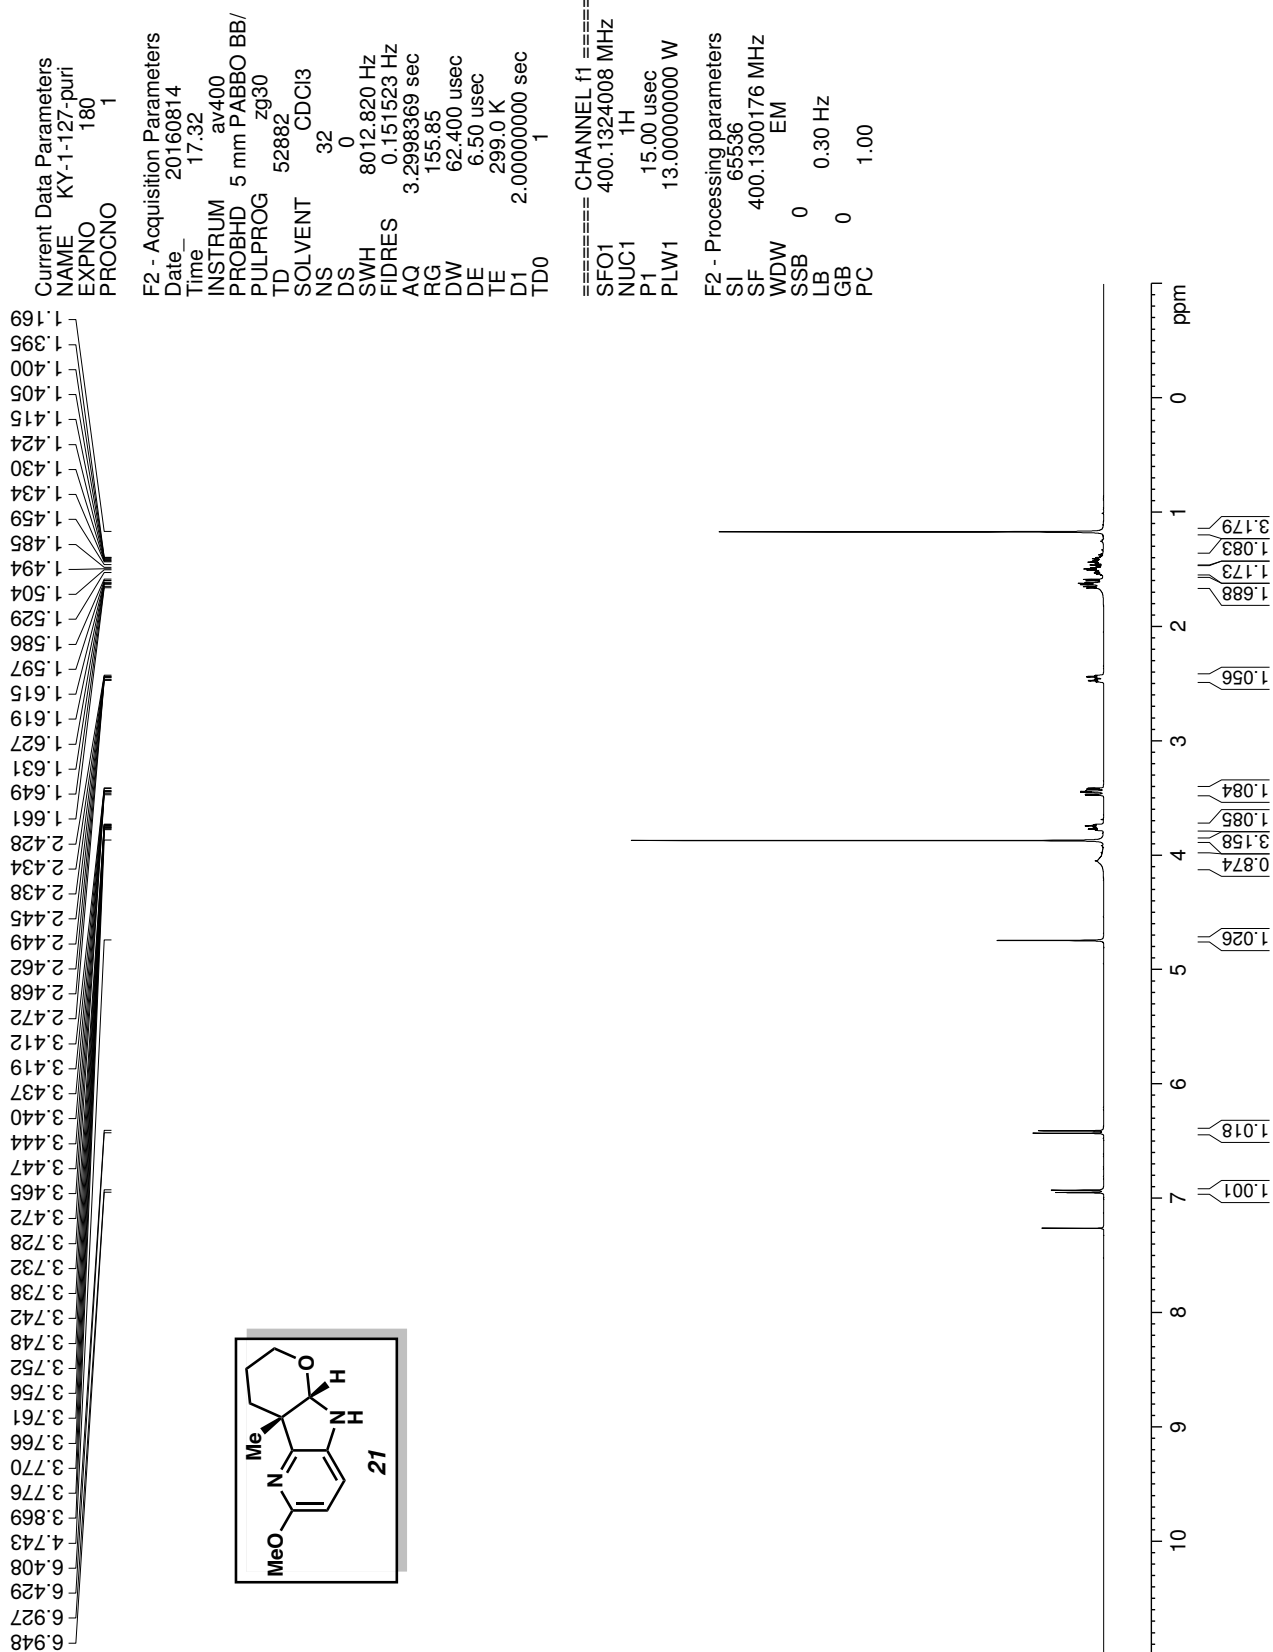

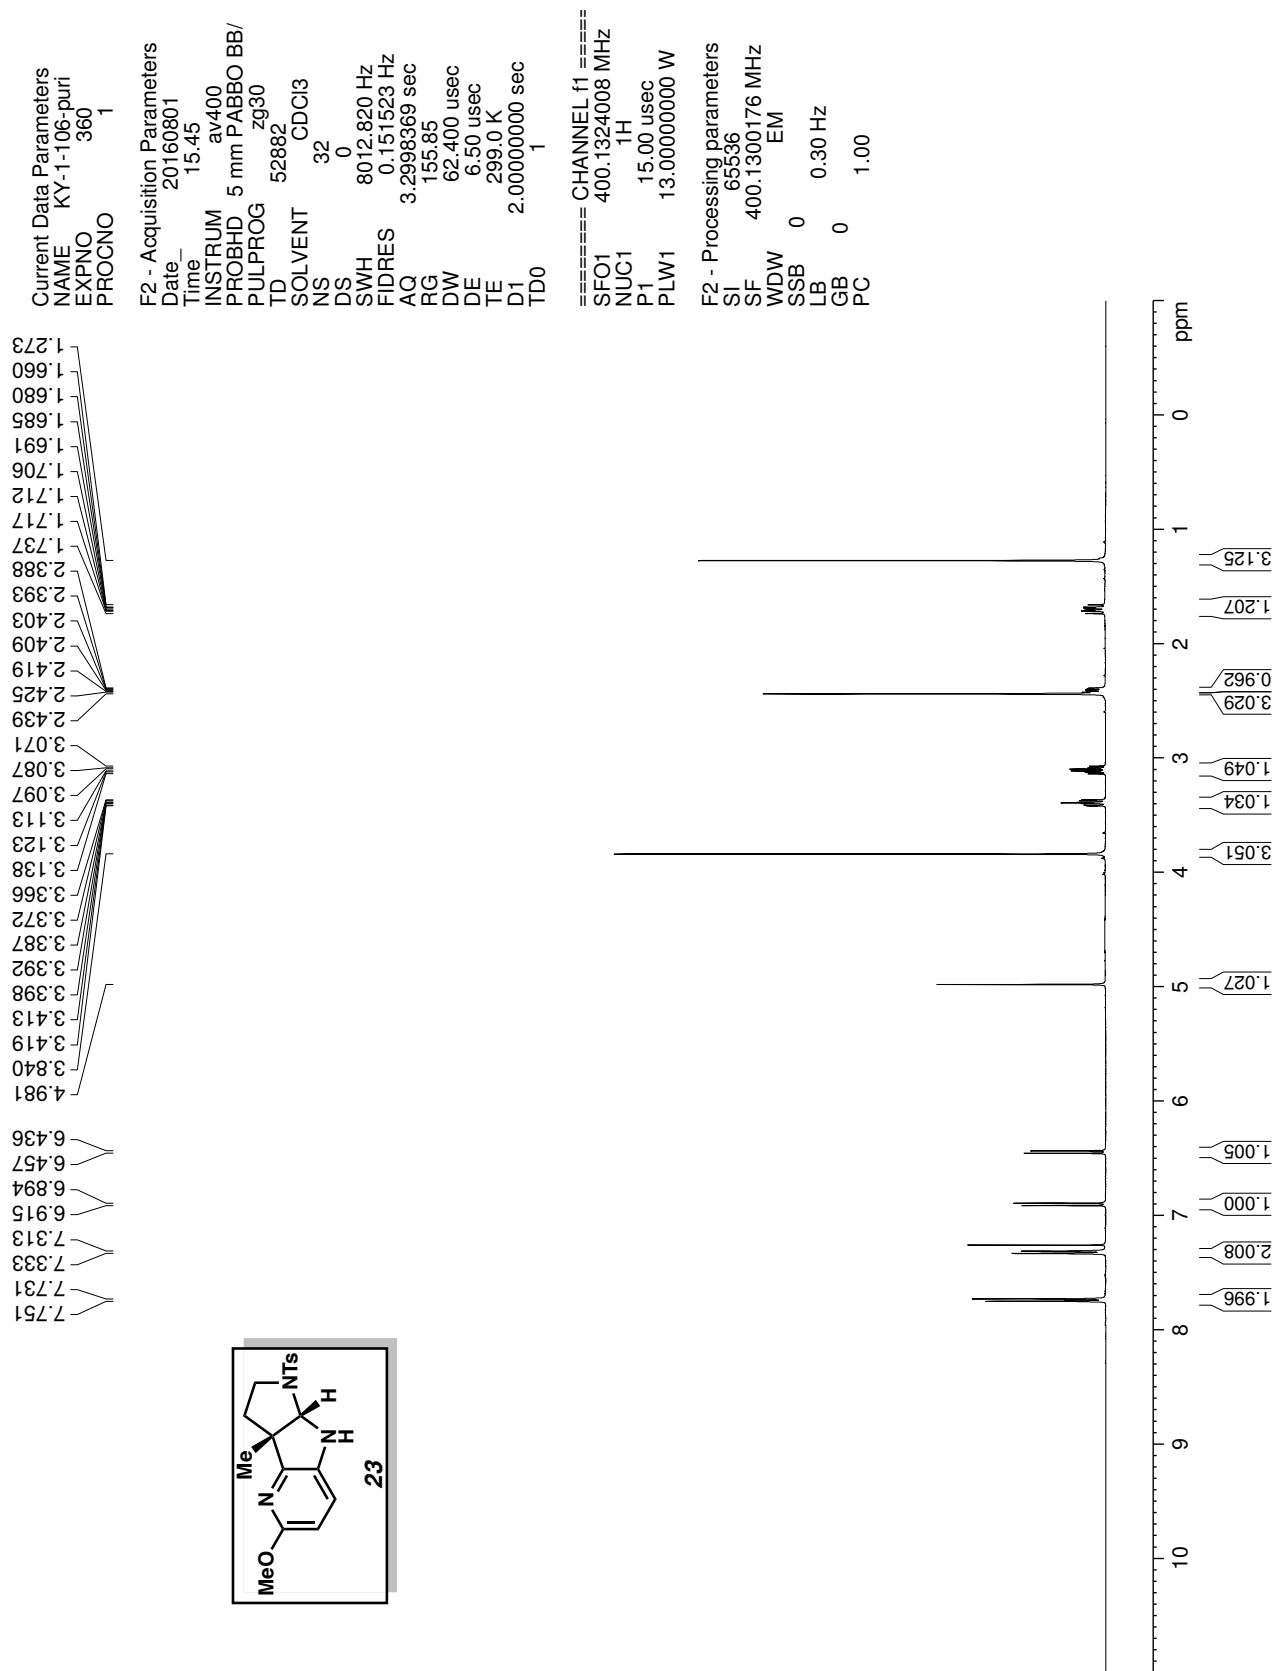

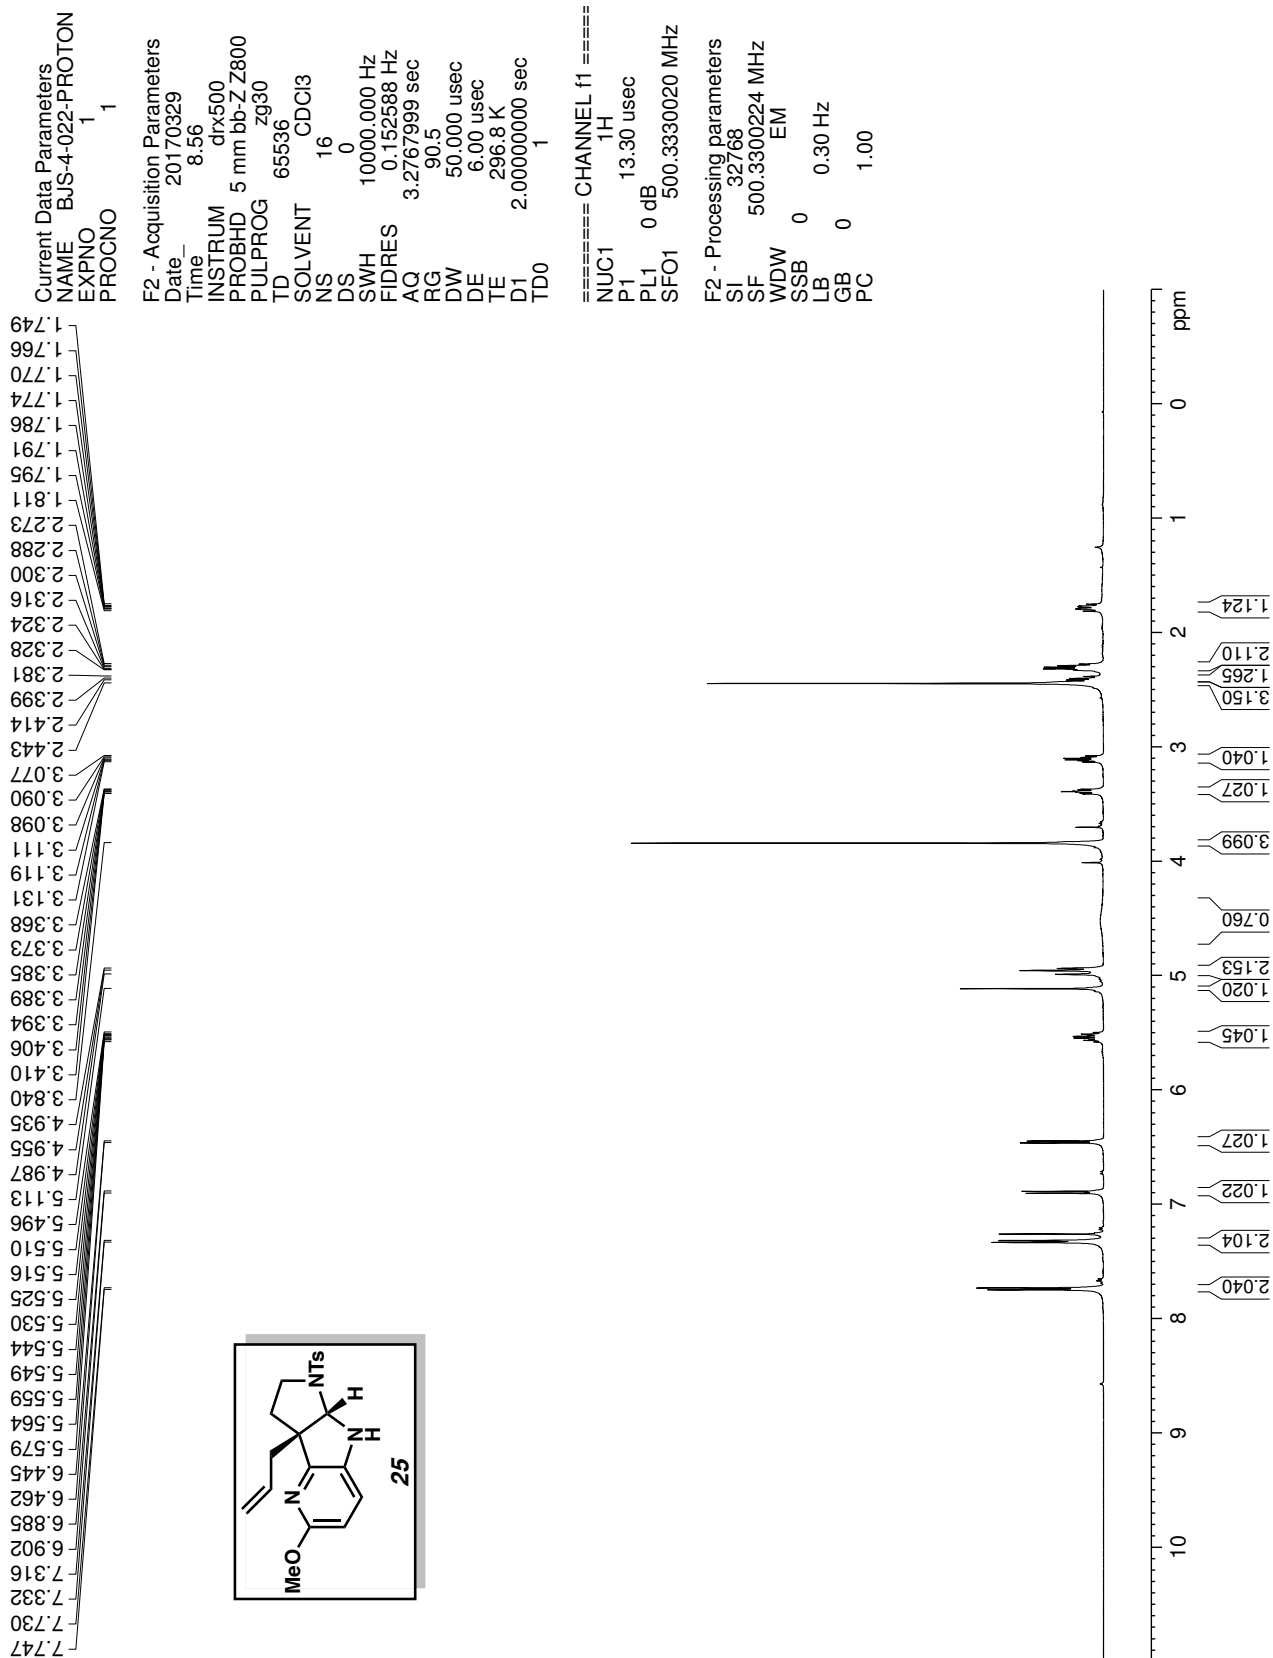

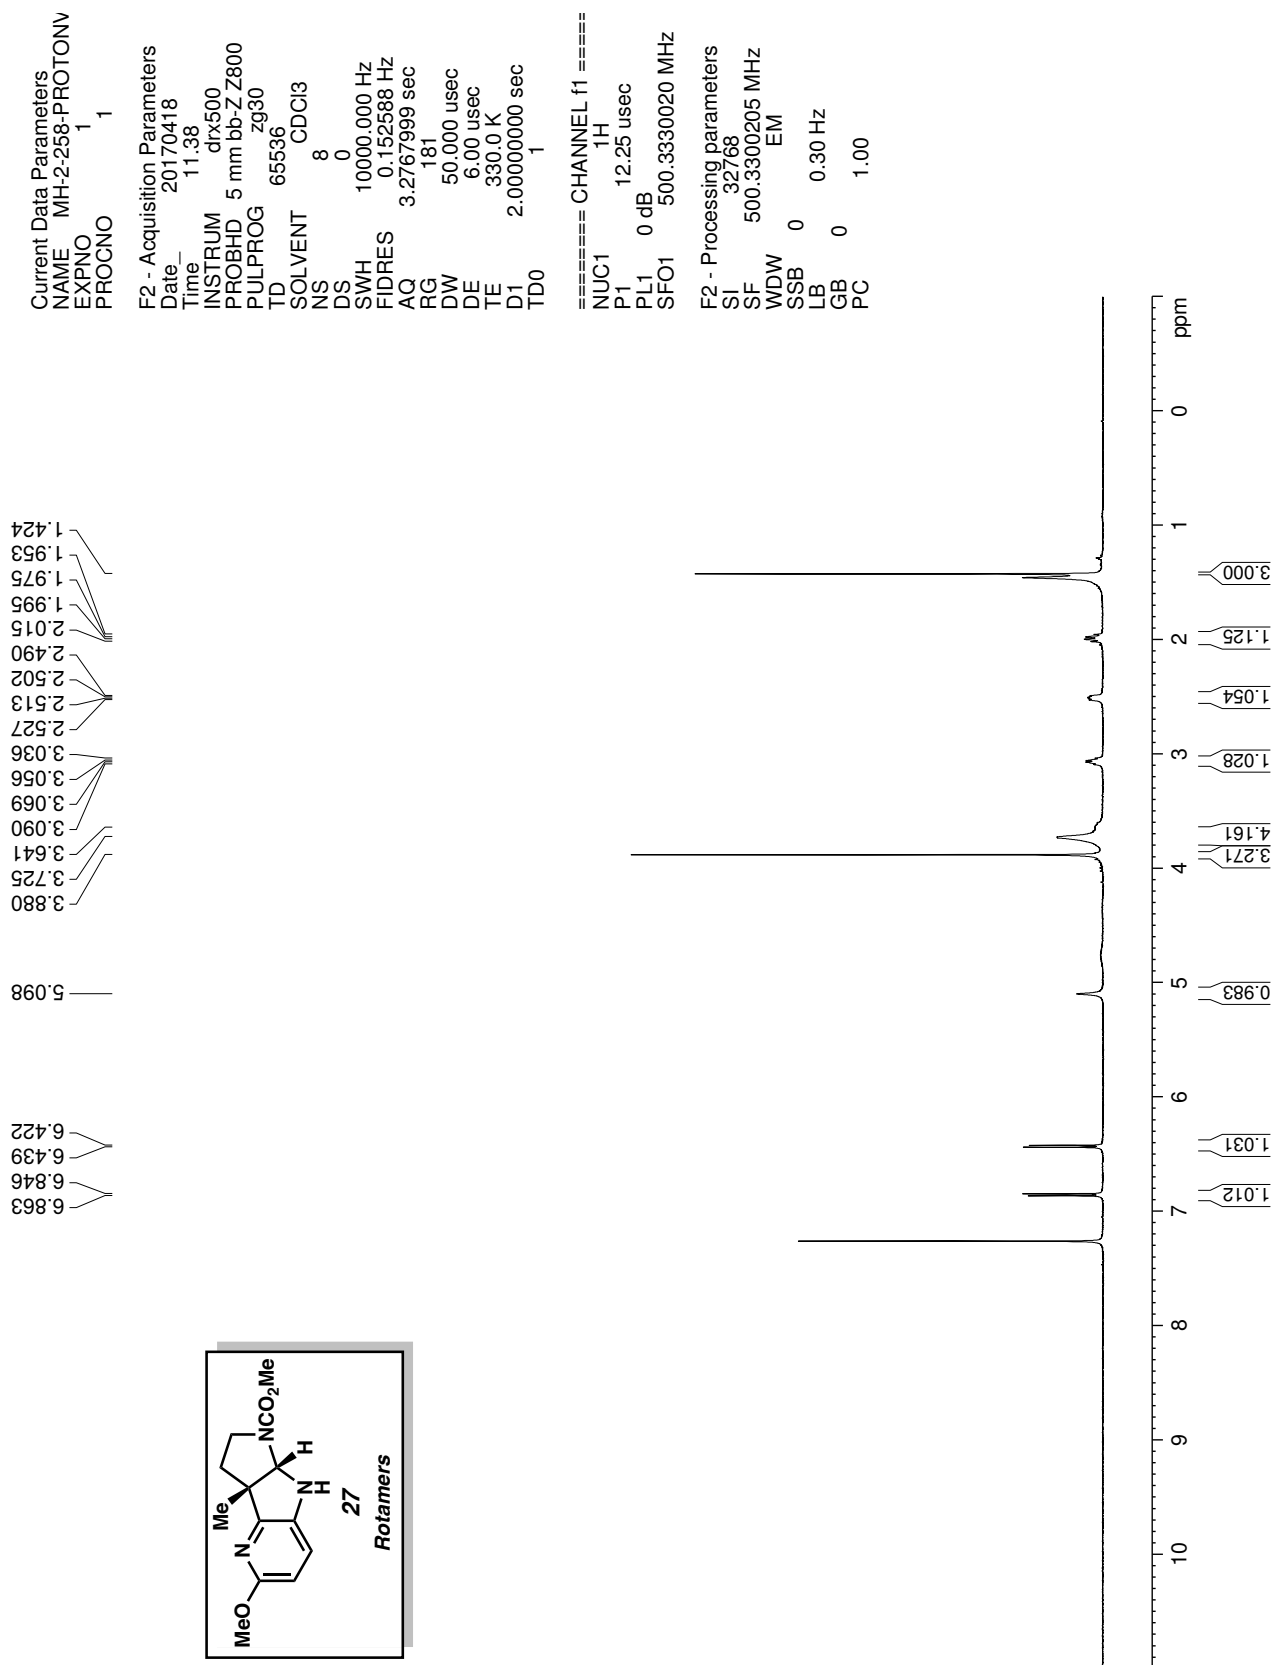

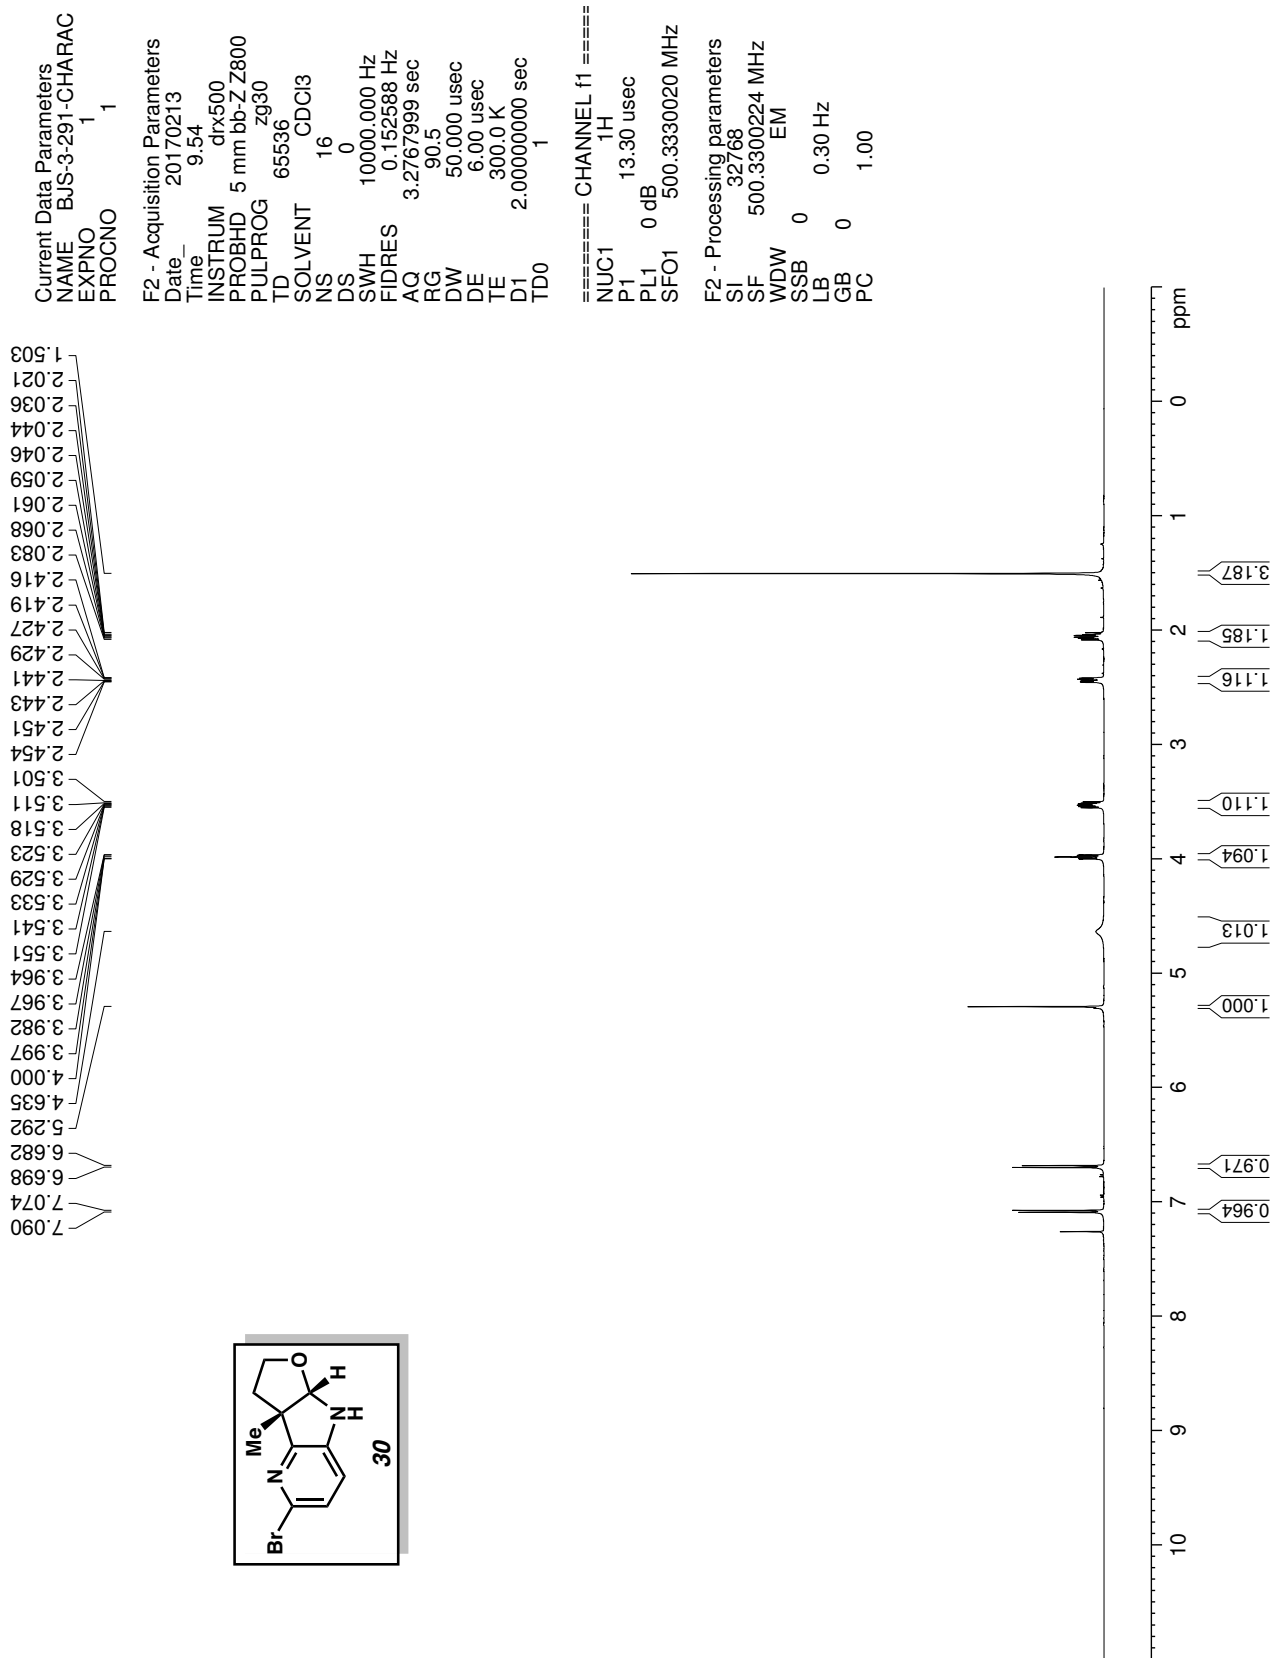

Current Data Parameters  
 NAME BJS-3-298-CHARAC  
 EXPNO 1  
 PROCNO 1

F2 - Acquisition Parameters

Date 20170213  
 Time 9.58  
 INSTRUM drx500  
 PROBH 5 mm bb-Z800  
 PULPROG zg30  
 TD 65536  
 SOLVENT CDCl3  
 NS 16  
 DS 0  
 SWH 10000.000 Hz  
 FIDRES 0.152588 Hz  
 AQ 3.2767999 sec  
 RG 101.6  
 DW 50.000 usec  
 DE 6.00 usec  
 TE 296.9 K  
 D1 2.00000000 sec  
 TD0 1

==== CHANNEL f1 =====  
 NUC1 1H  
 P1 13.30 usec  
 PL1 0 dB  
 SFO1 500.3330020 MHz

F2 - Processing parameters

SI 32768  
 SF 500.3300221 MHz  
 WDW EM  
 SSB 0  
 LB 0.30 Hz  
 GB 0  
 PC 1.00

6.959  
 6.942  
 6.780  
 6.763  
 5.307  
 4.622  
 4.003  
 4.000  
 3.988  
 3.985  
 3.982  
 3.971  
 3.967  
 3.554  
 3.544  
 3.537  
 3.532  
 3.526  
 3.521  
 3.514  
 3.504  
 2.454  
 2.451  
 2.443  
 2.441  
 2.429  
 2.426  
 2.419  
 2.416  
 2.090  
 2.075  
 2.067  
 2.065  
 2.052  
 2.050  
 2.043  
 2.028  
 1.507

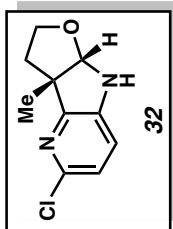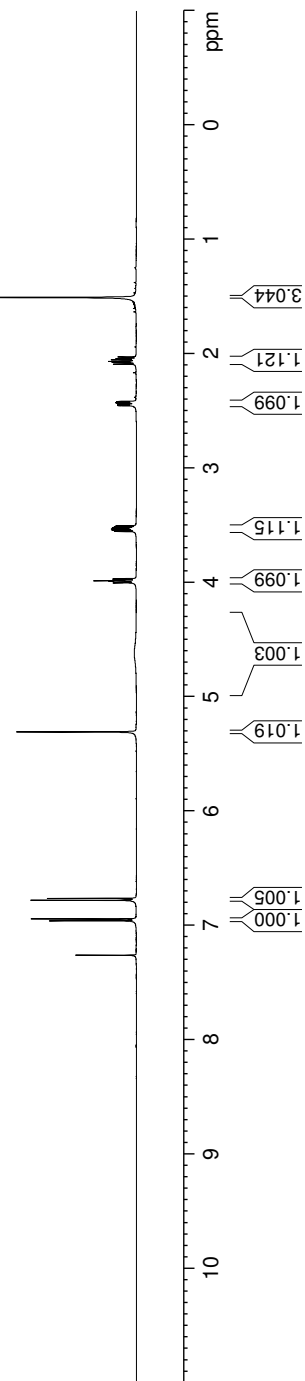

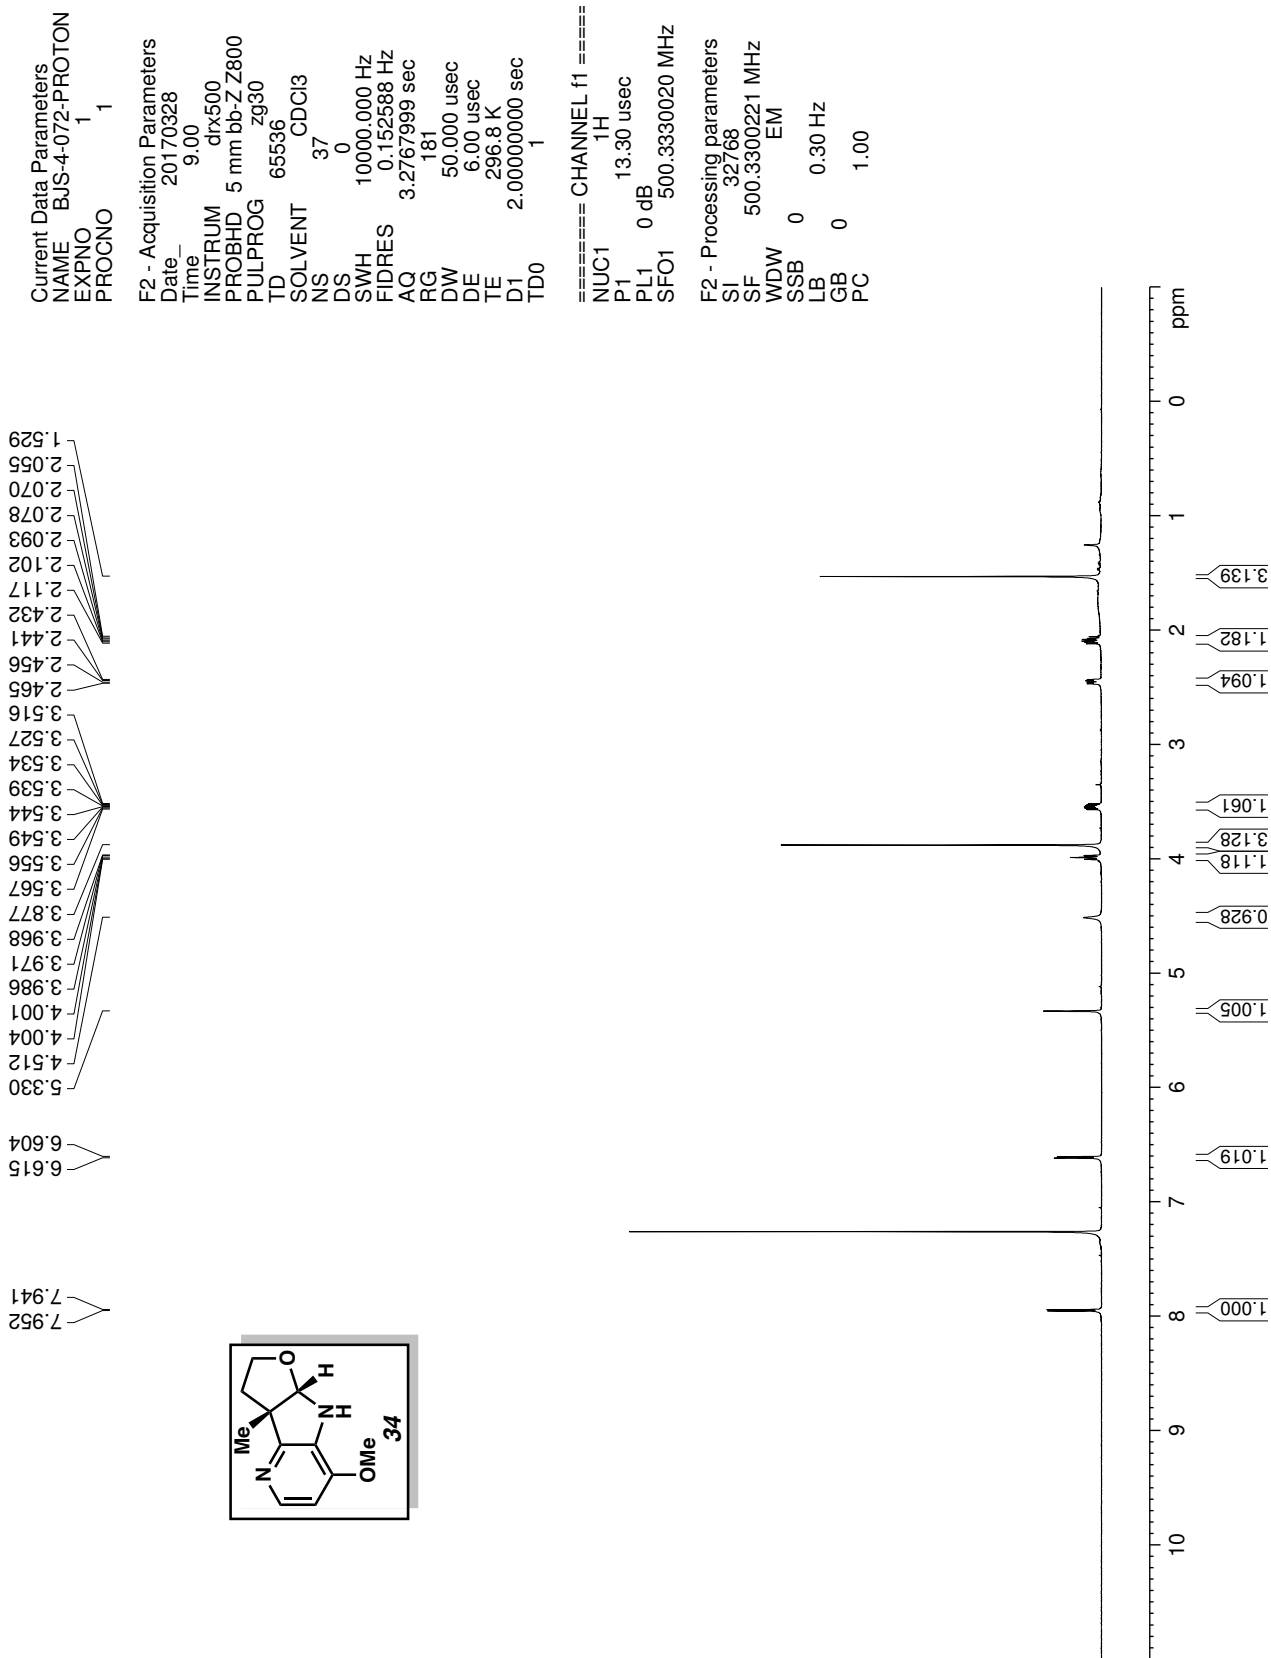



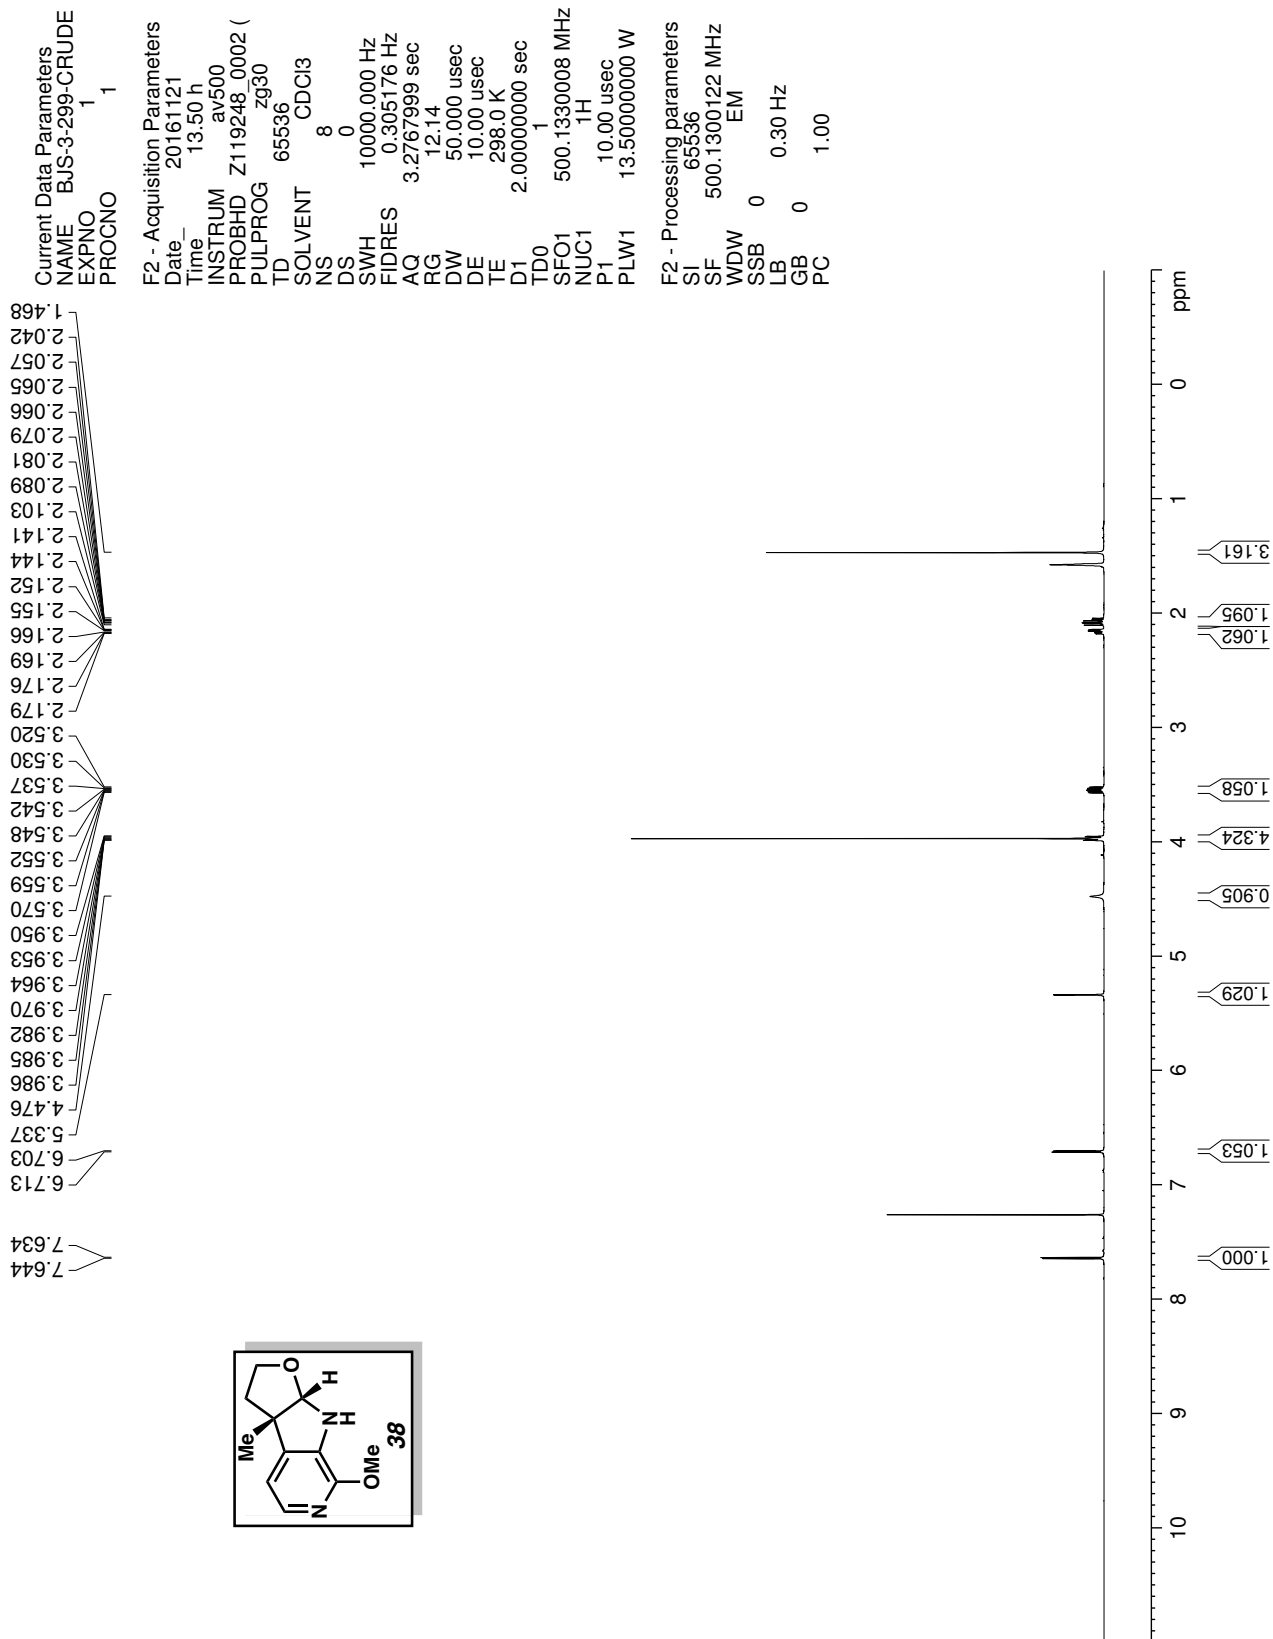

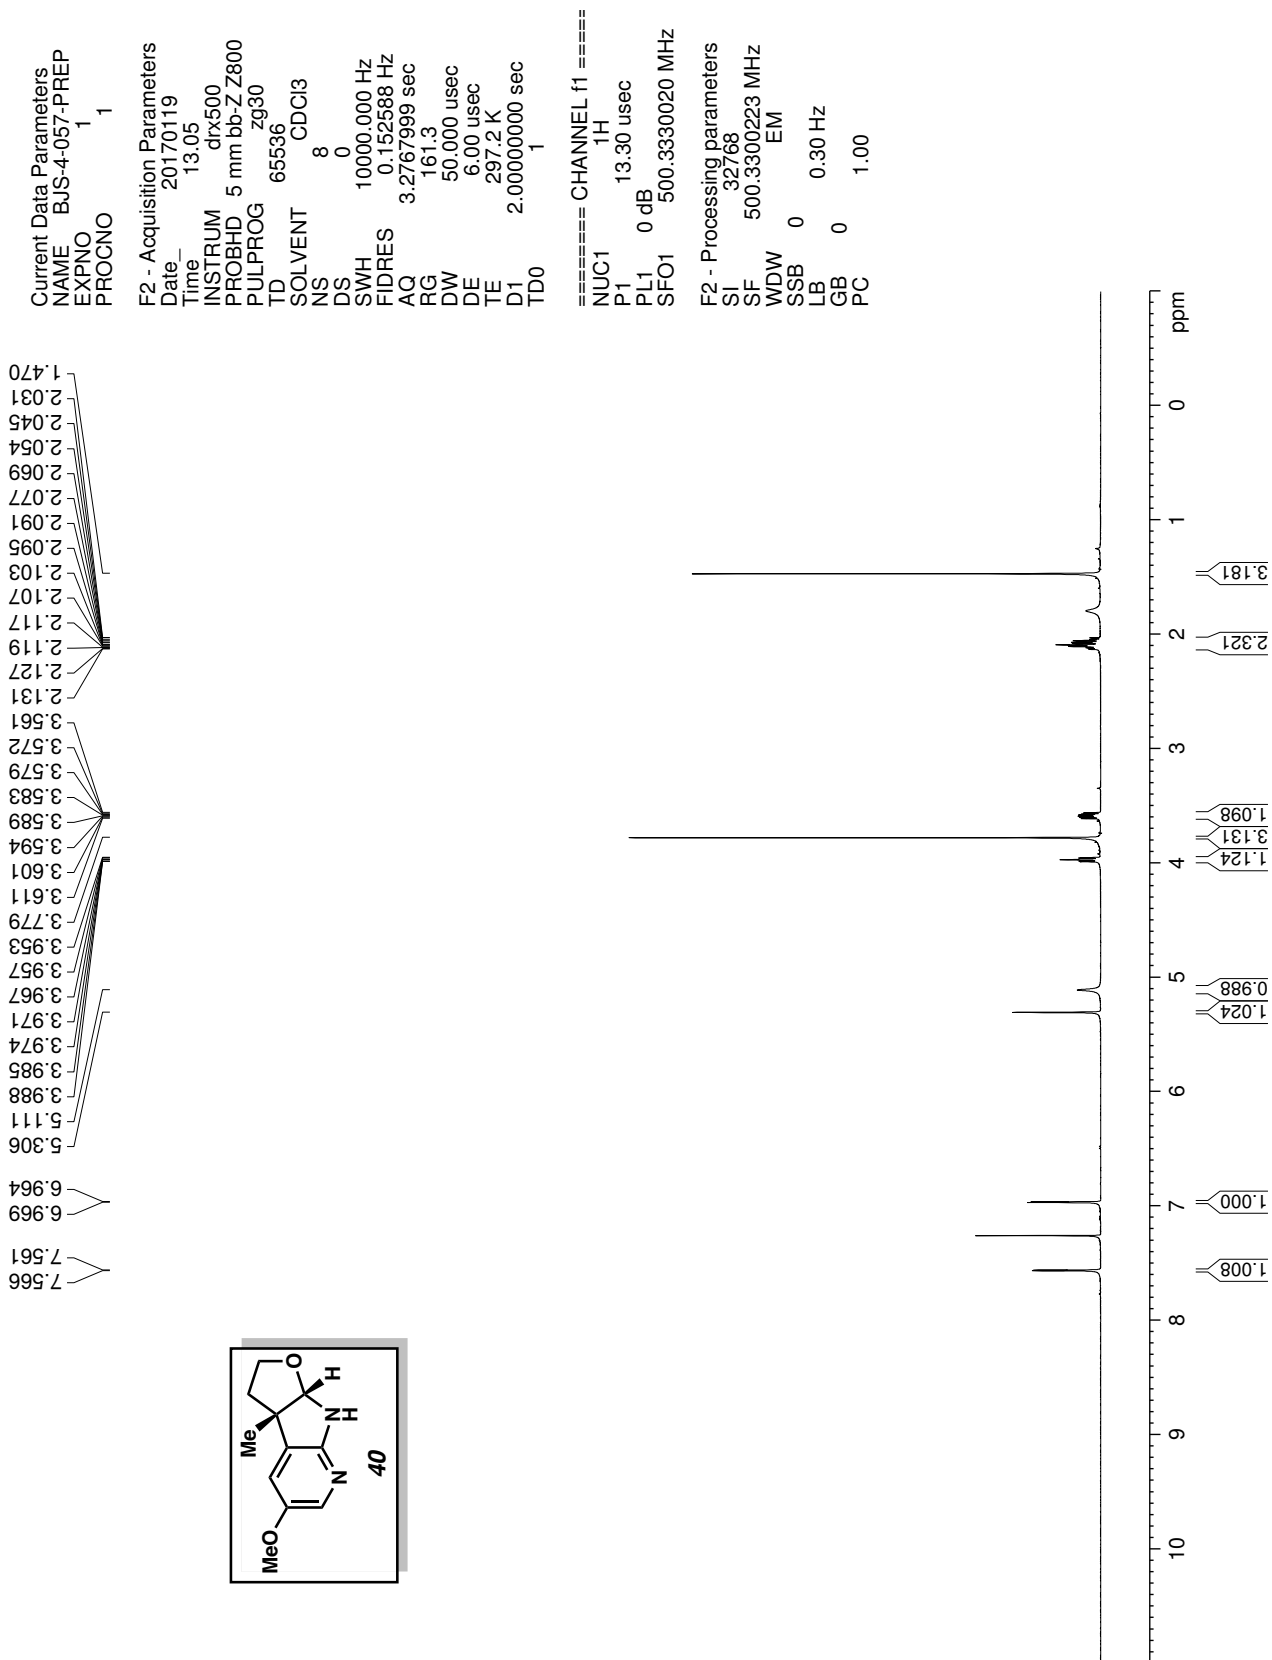

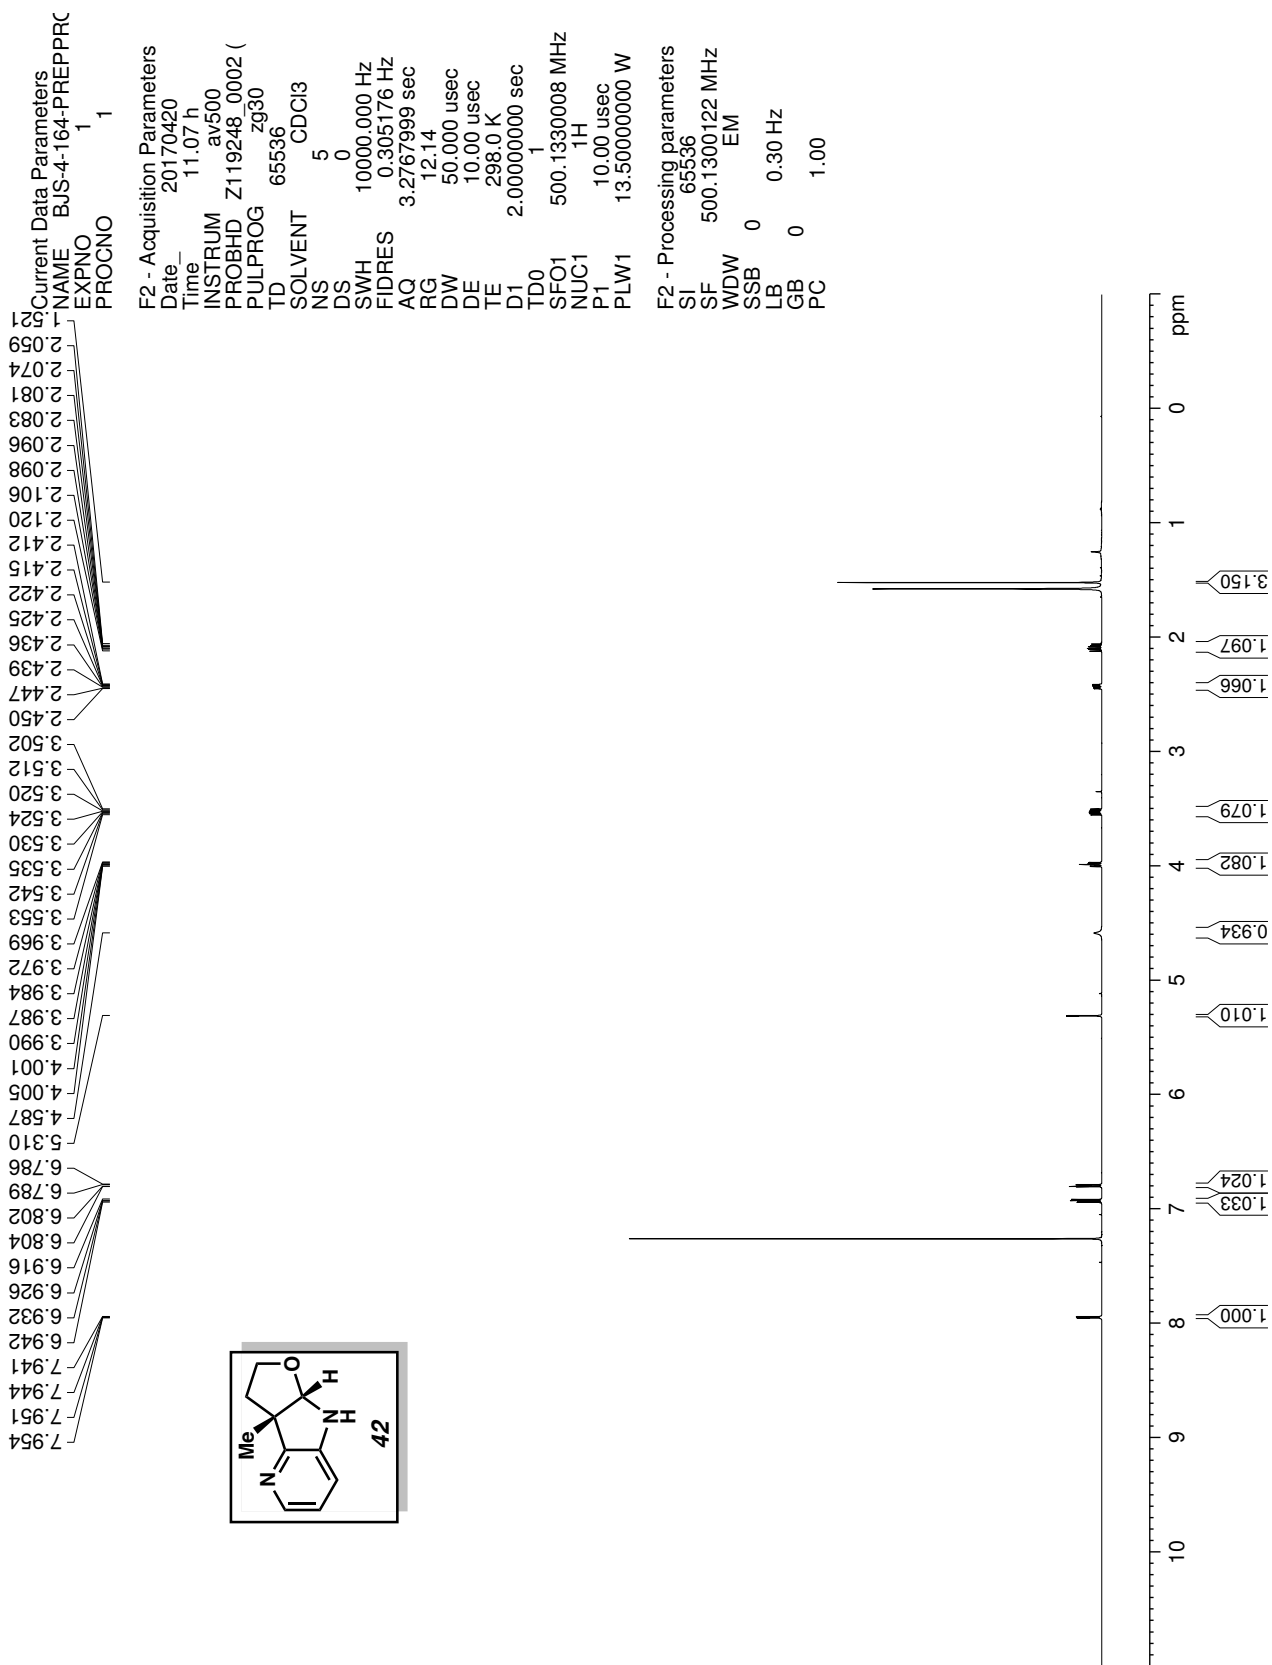

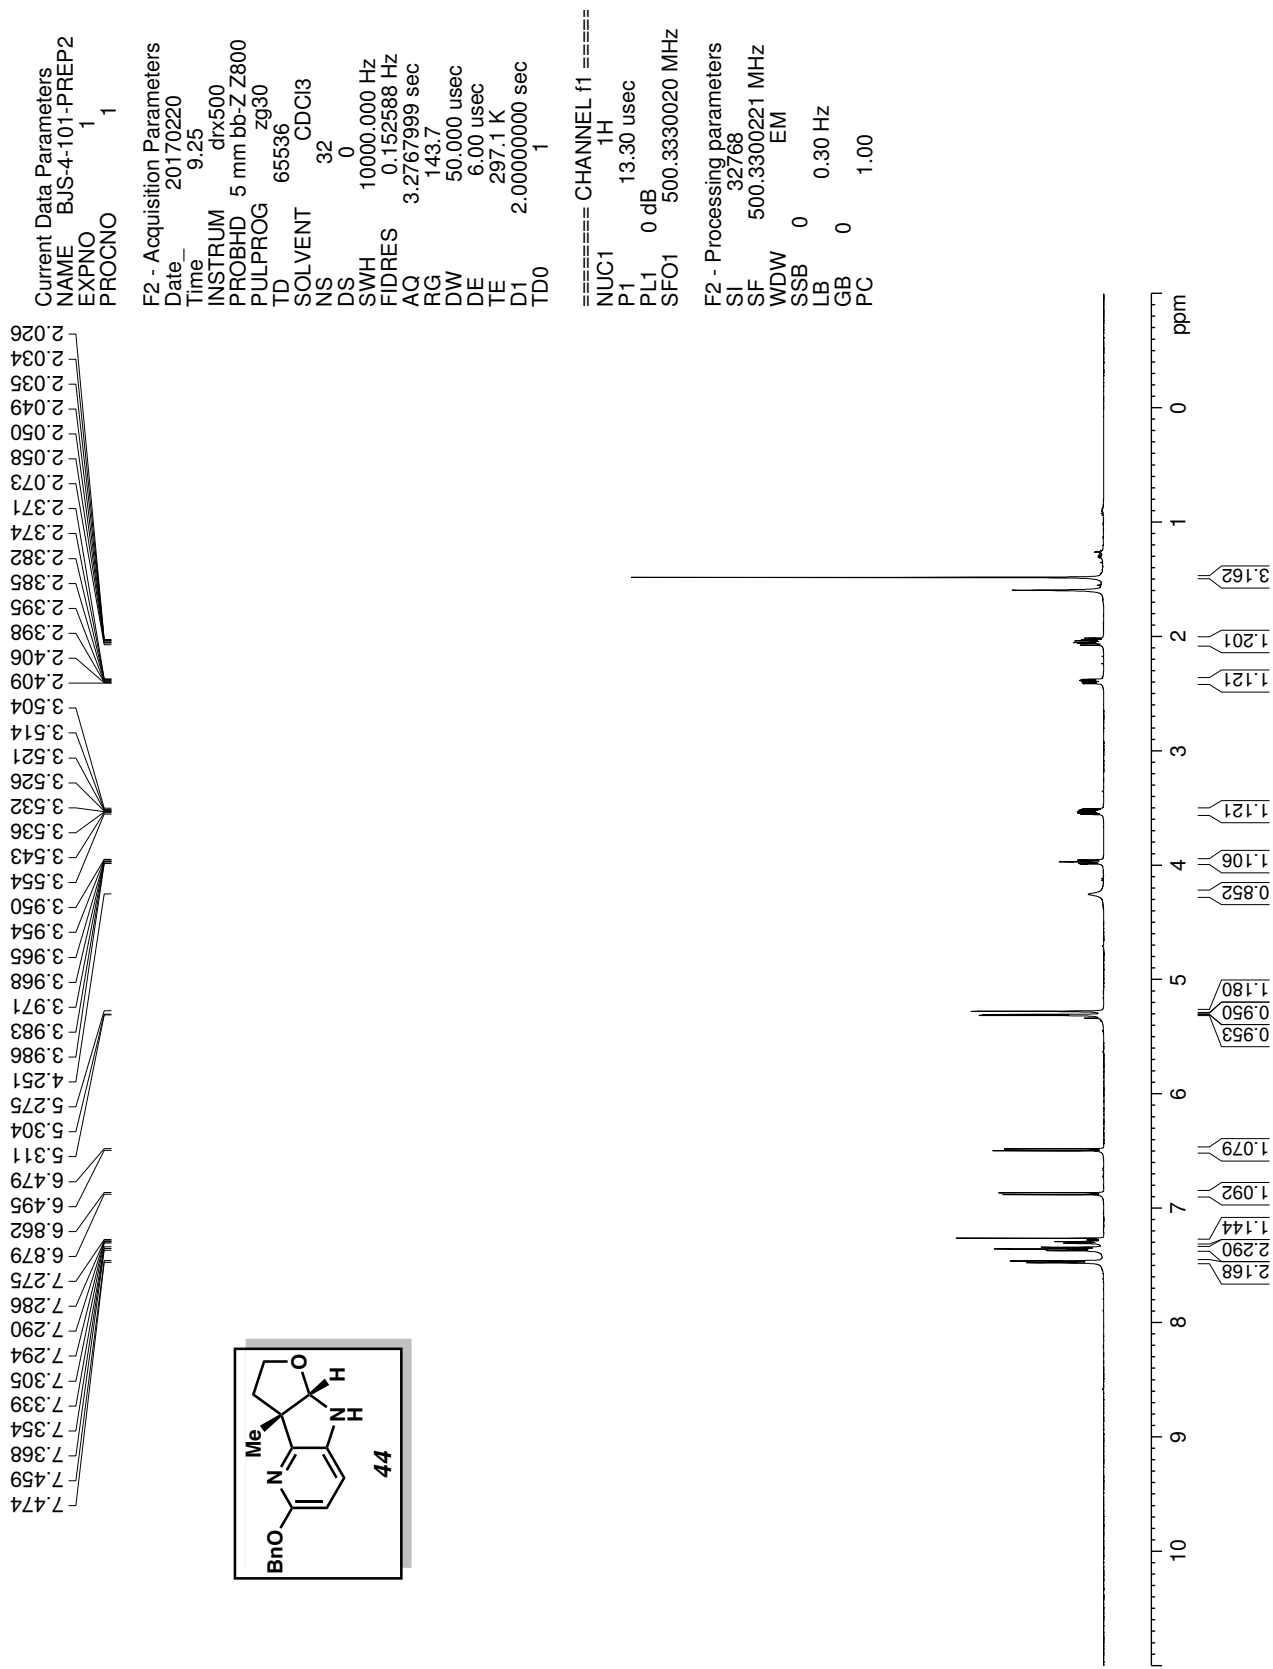

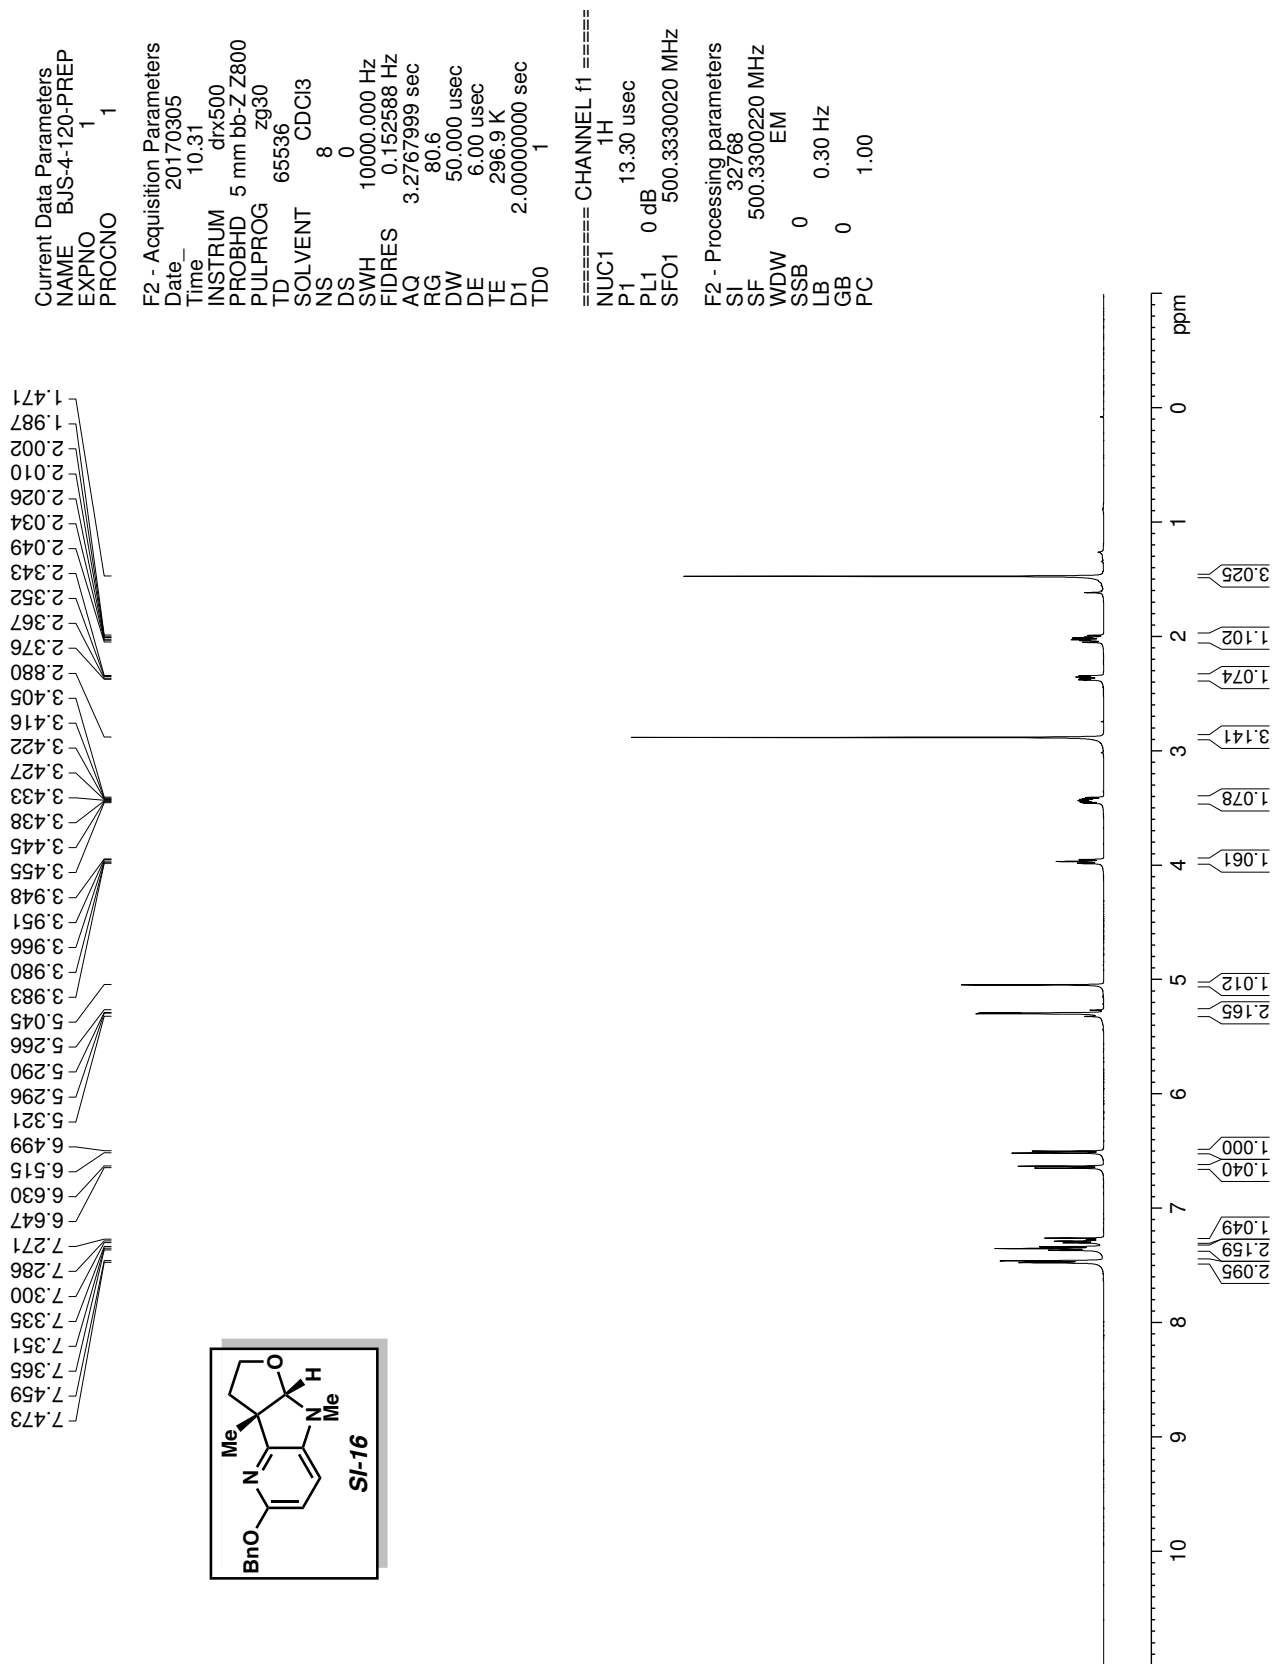

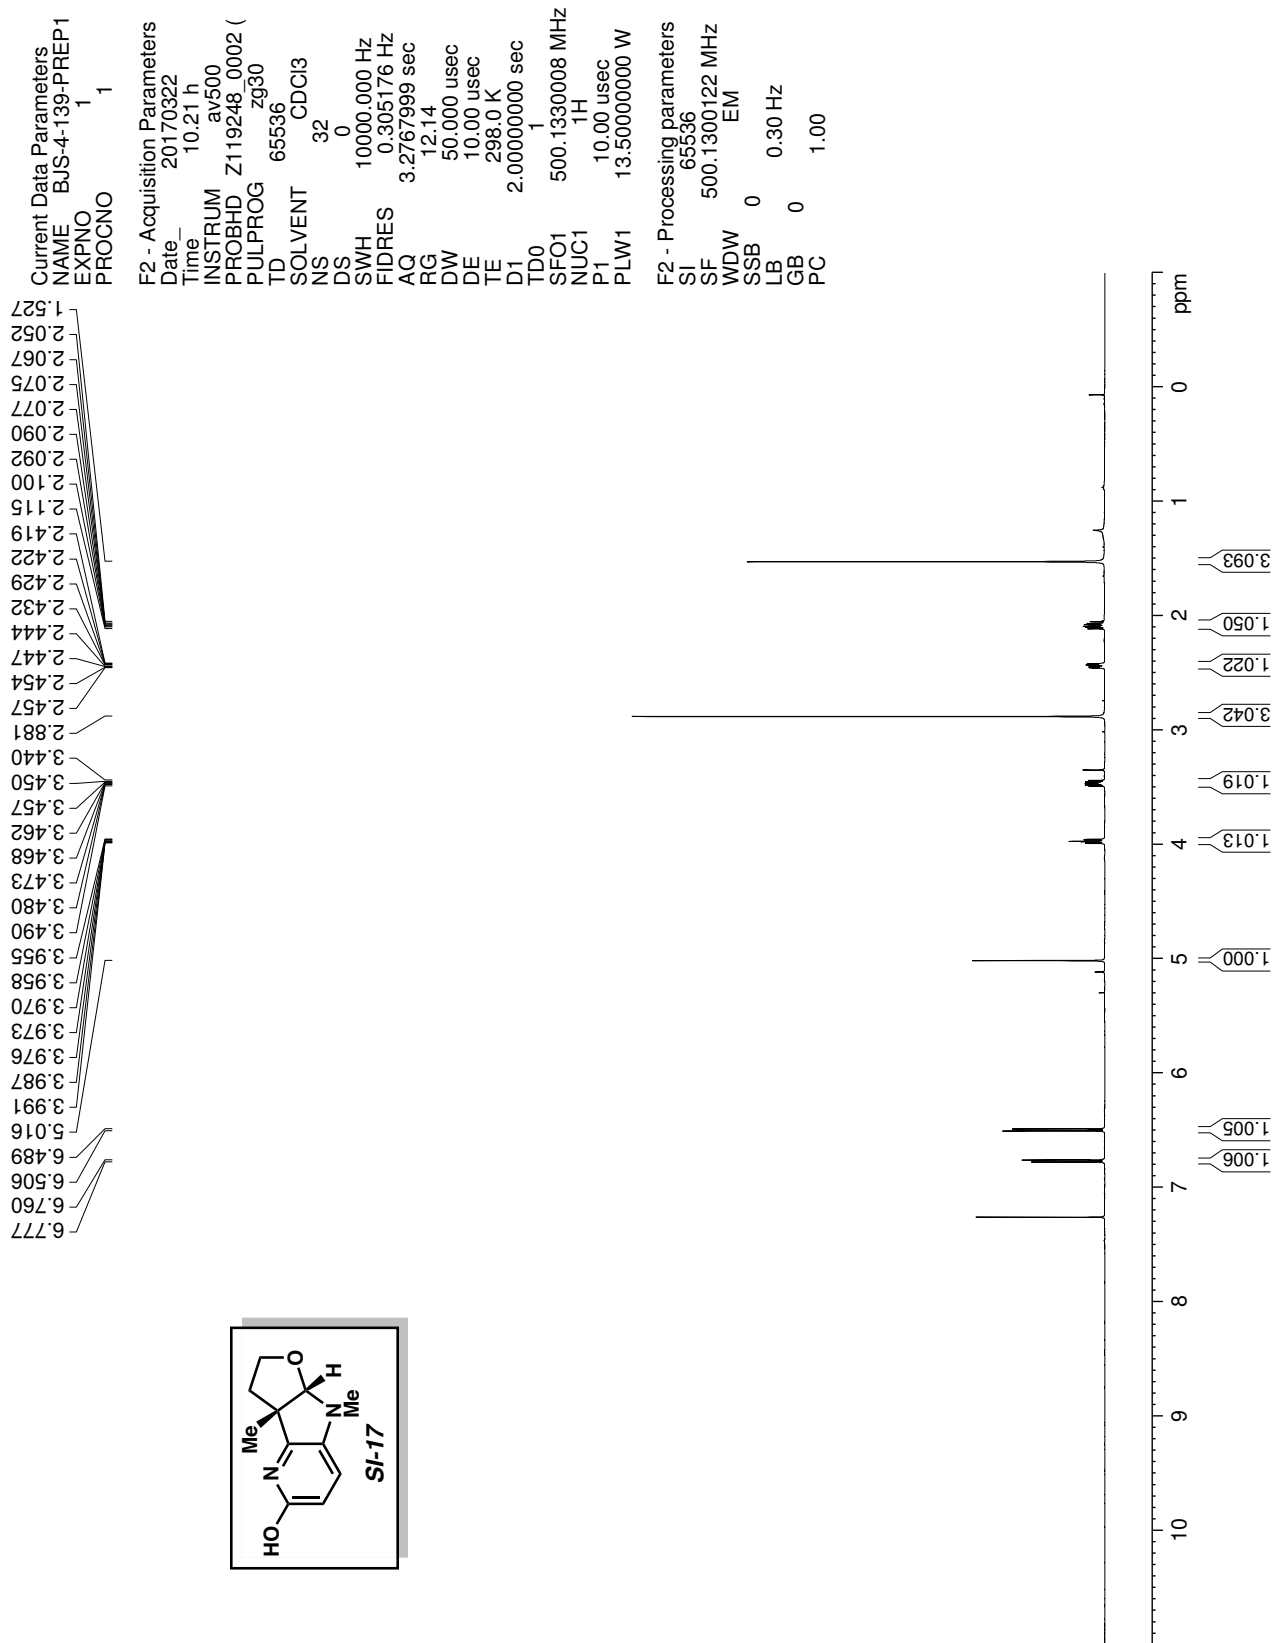

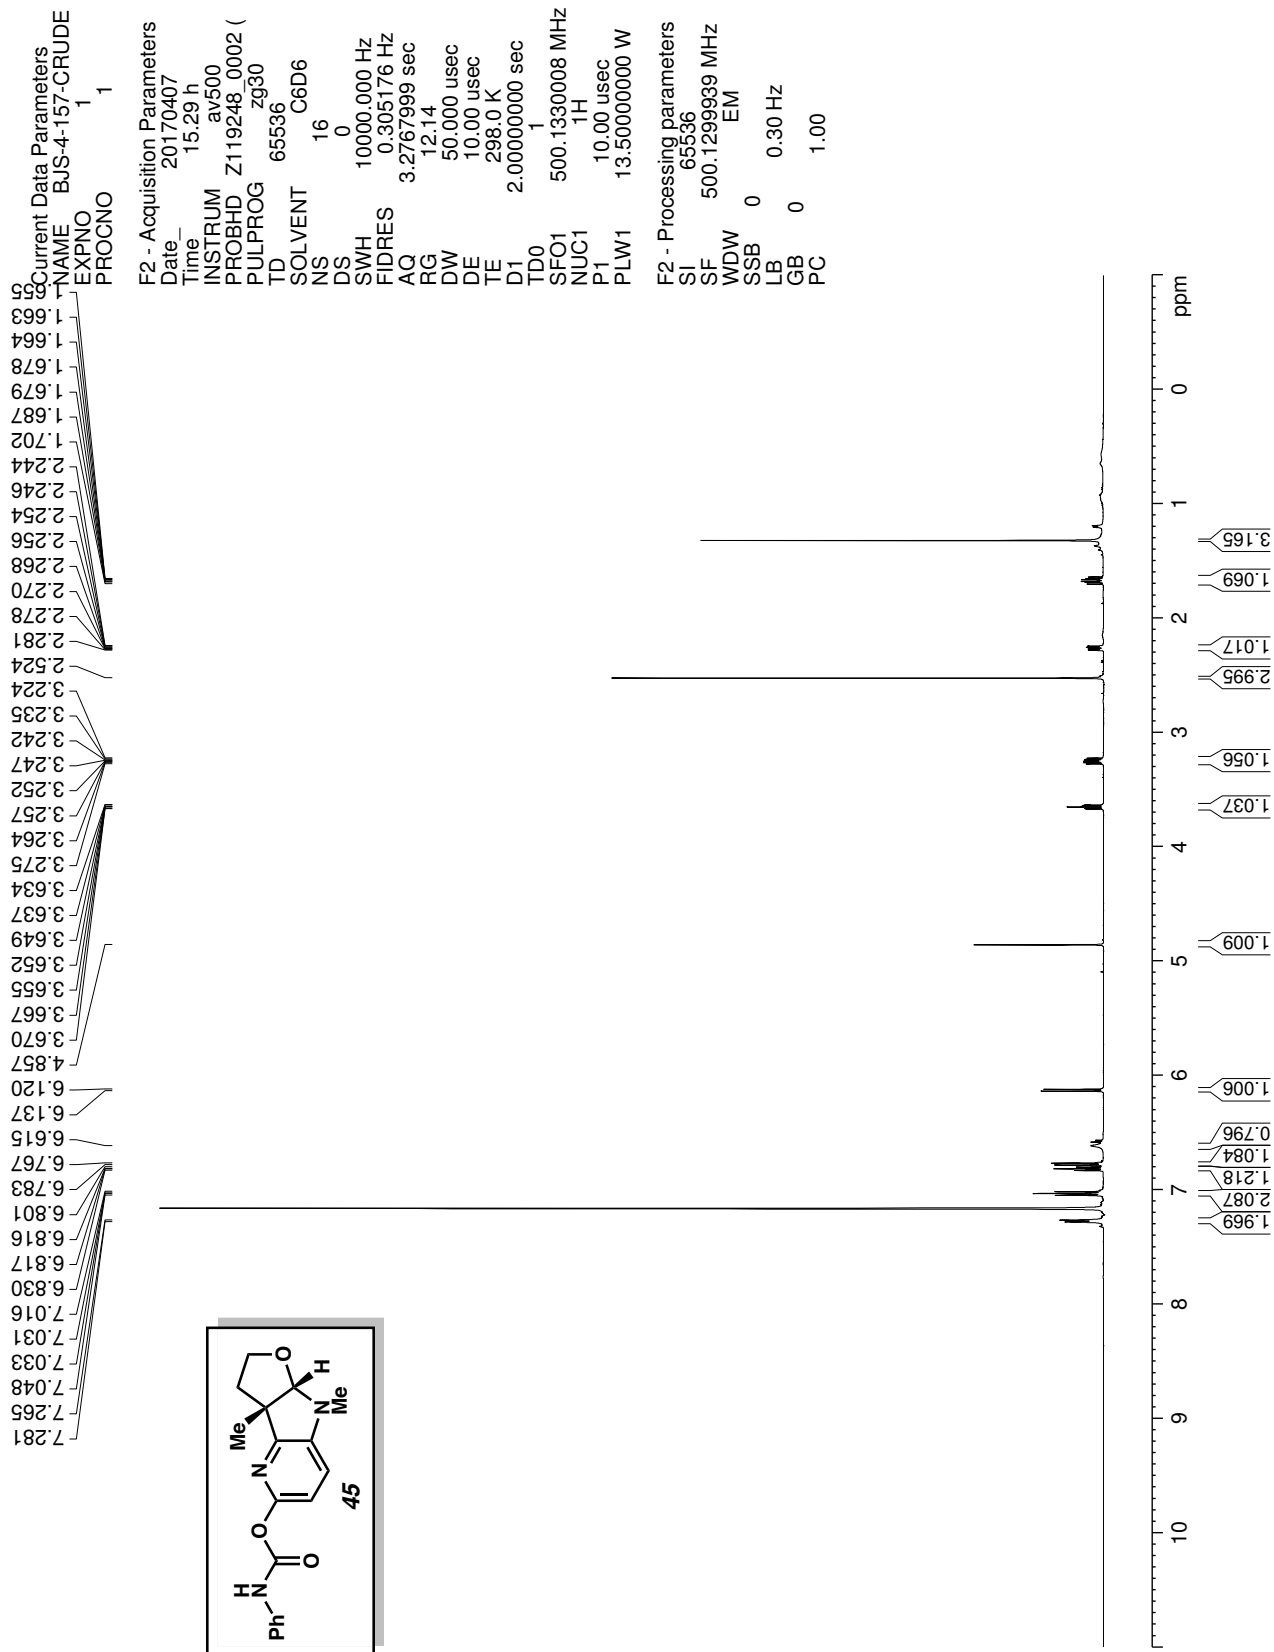

Current Data Parameters  
 NAME ENP-05-046-monster;  
 EXPNO 1  
 PROCNO 1

F2 - Acquisition Parameters

Date\_ 20170426  
 Time\_ 18.00  
 INSTRUM drx500  
 PROBHD 5 mm bb-Z 2800  
 PULPROG zg30  
 TD 65536  
 SOLVENT CDCl3  
 NS 22  
 DS 0  
 SWH 10000.000 Hz  
 FIDRES 0.152588 Hz  
 AQ 3.2767999 sec  
 RG 203.2  
 DW 50.000 usec  
 DE 6.00 usec  
 TE 297.2 K  
 D1 2.00000000 sec  
 TD0 1

==== CHANNEL f1 =====

NUC1 1H  
 P1 13.30 usec  
 PL1 0 dB  
 SFO1 500.3330020 MHz

F2 - Processing parameters

SI 32768  
 SF 500.3300220 MHz  
 WDW EM  
 SSB 0  
 LB 0.30 Hz  
 GB 0  
 PC 1.00

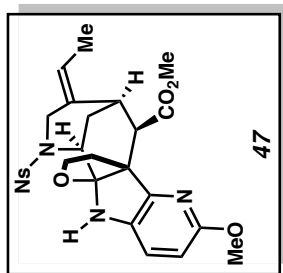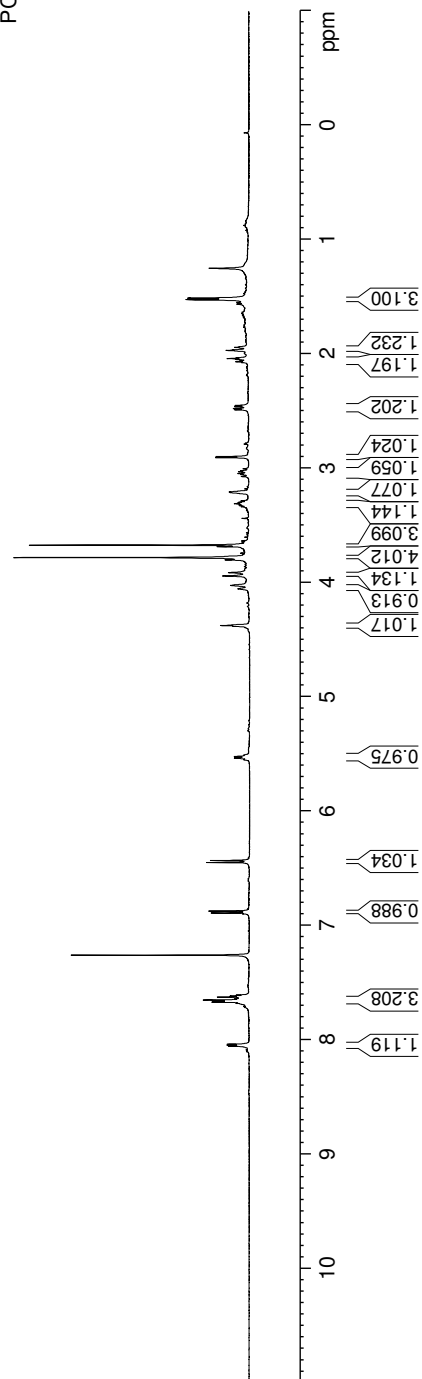



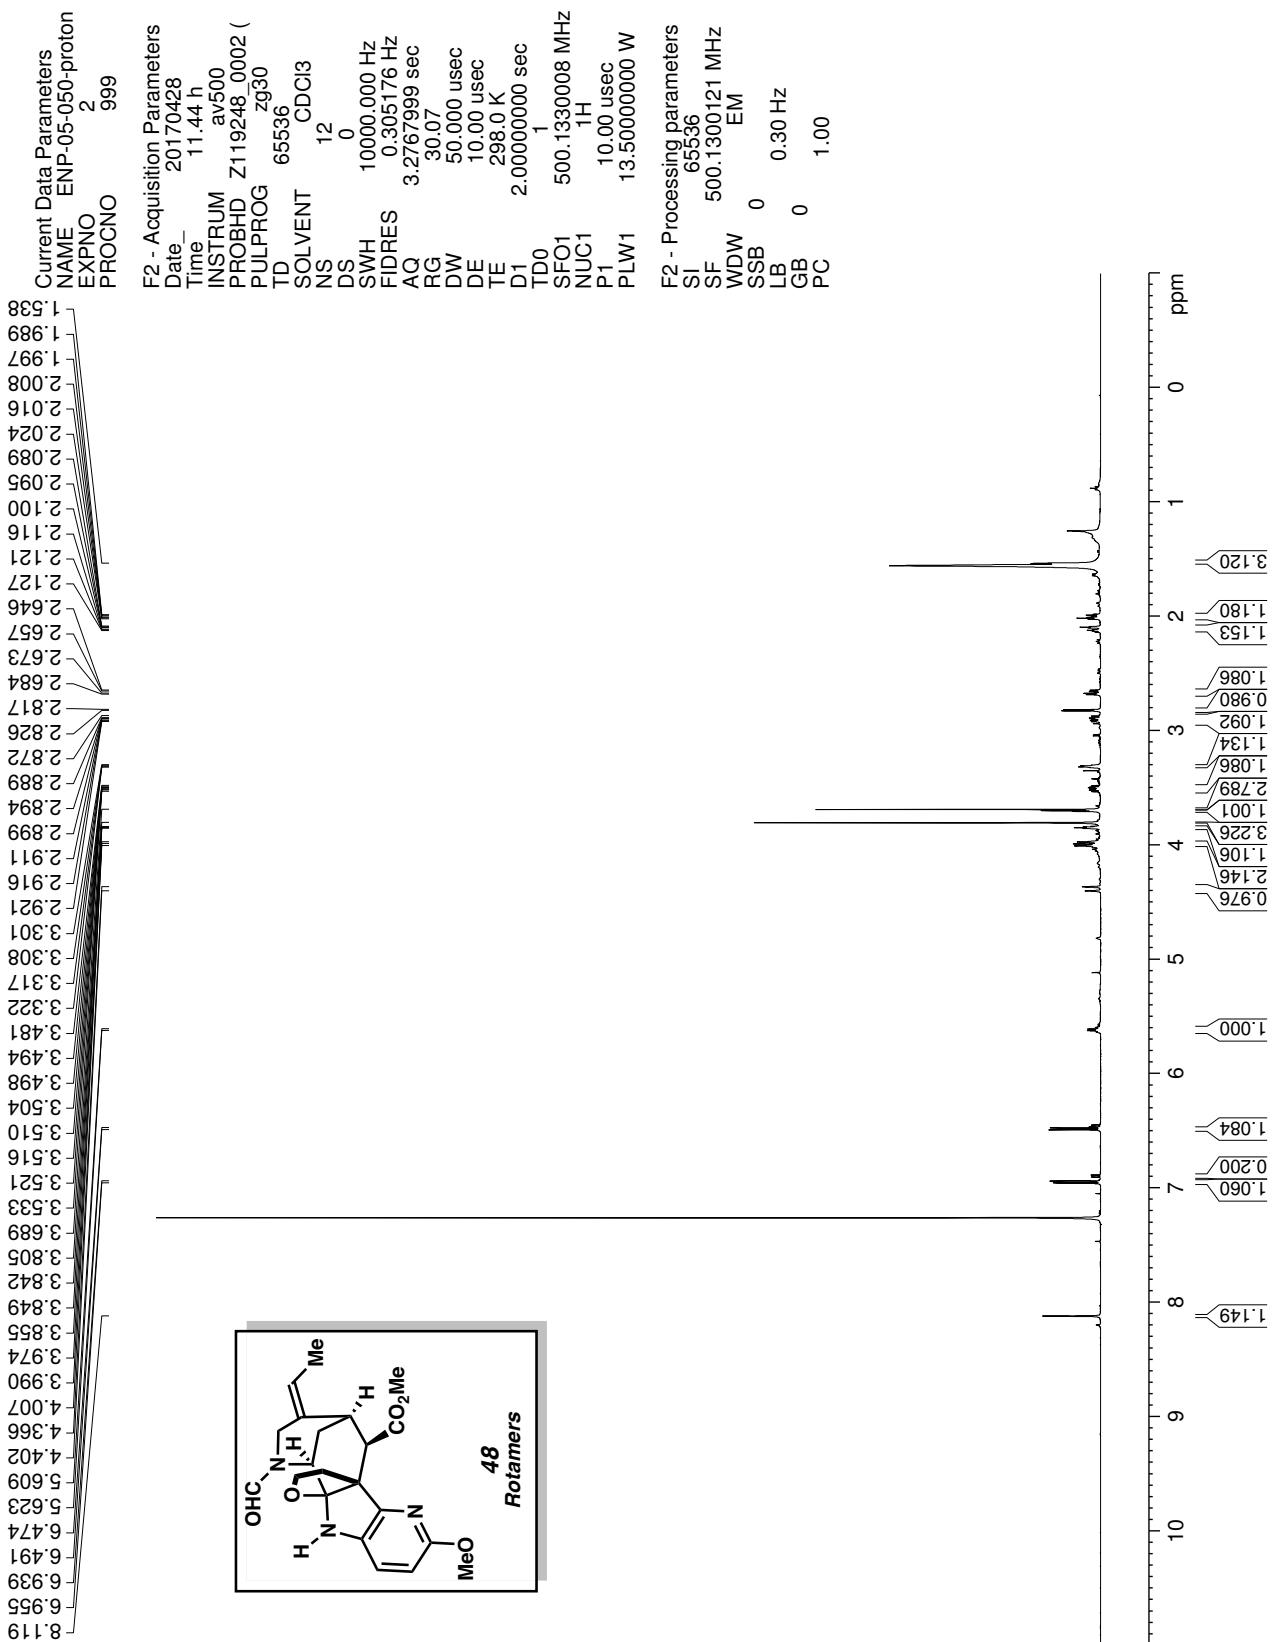

# **$^{13}\text{C}$ NMR Spectra**

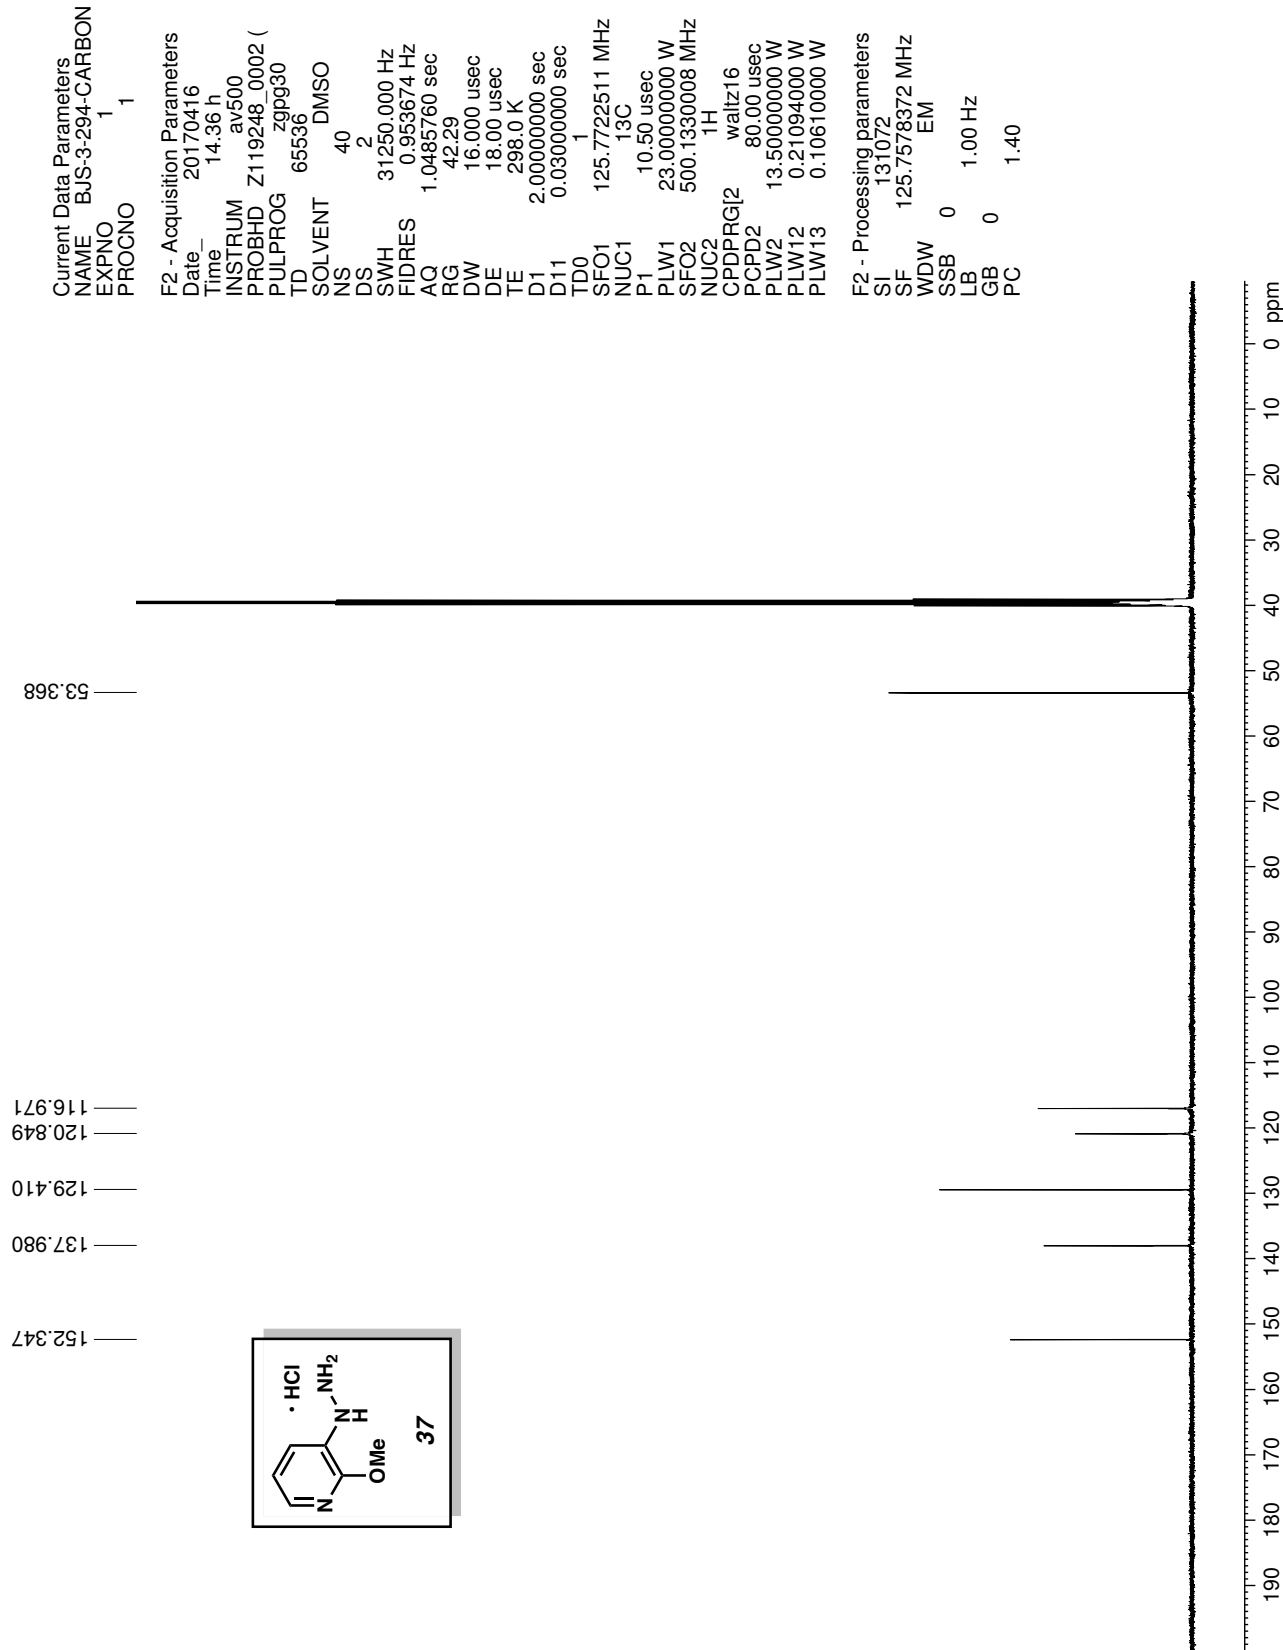

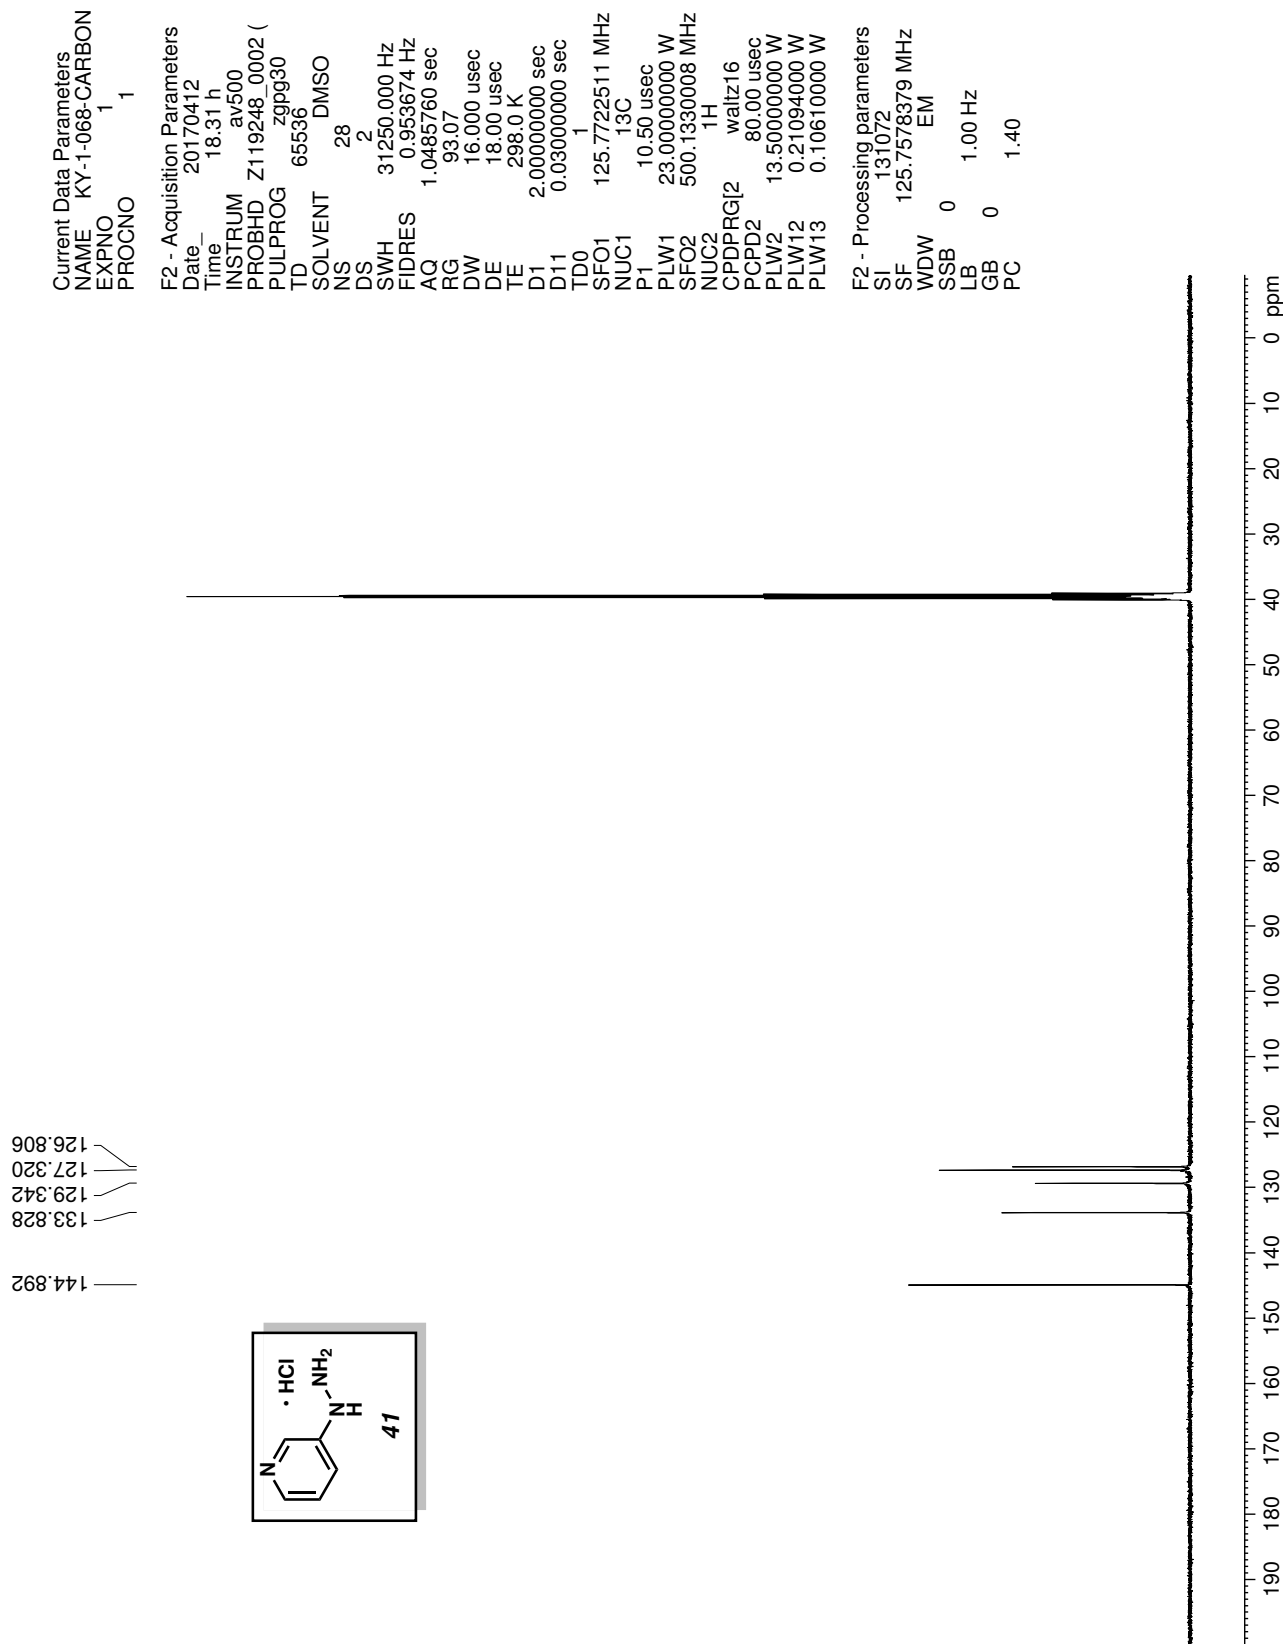

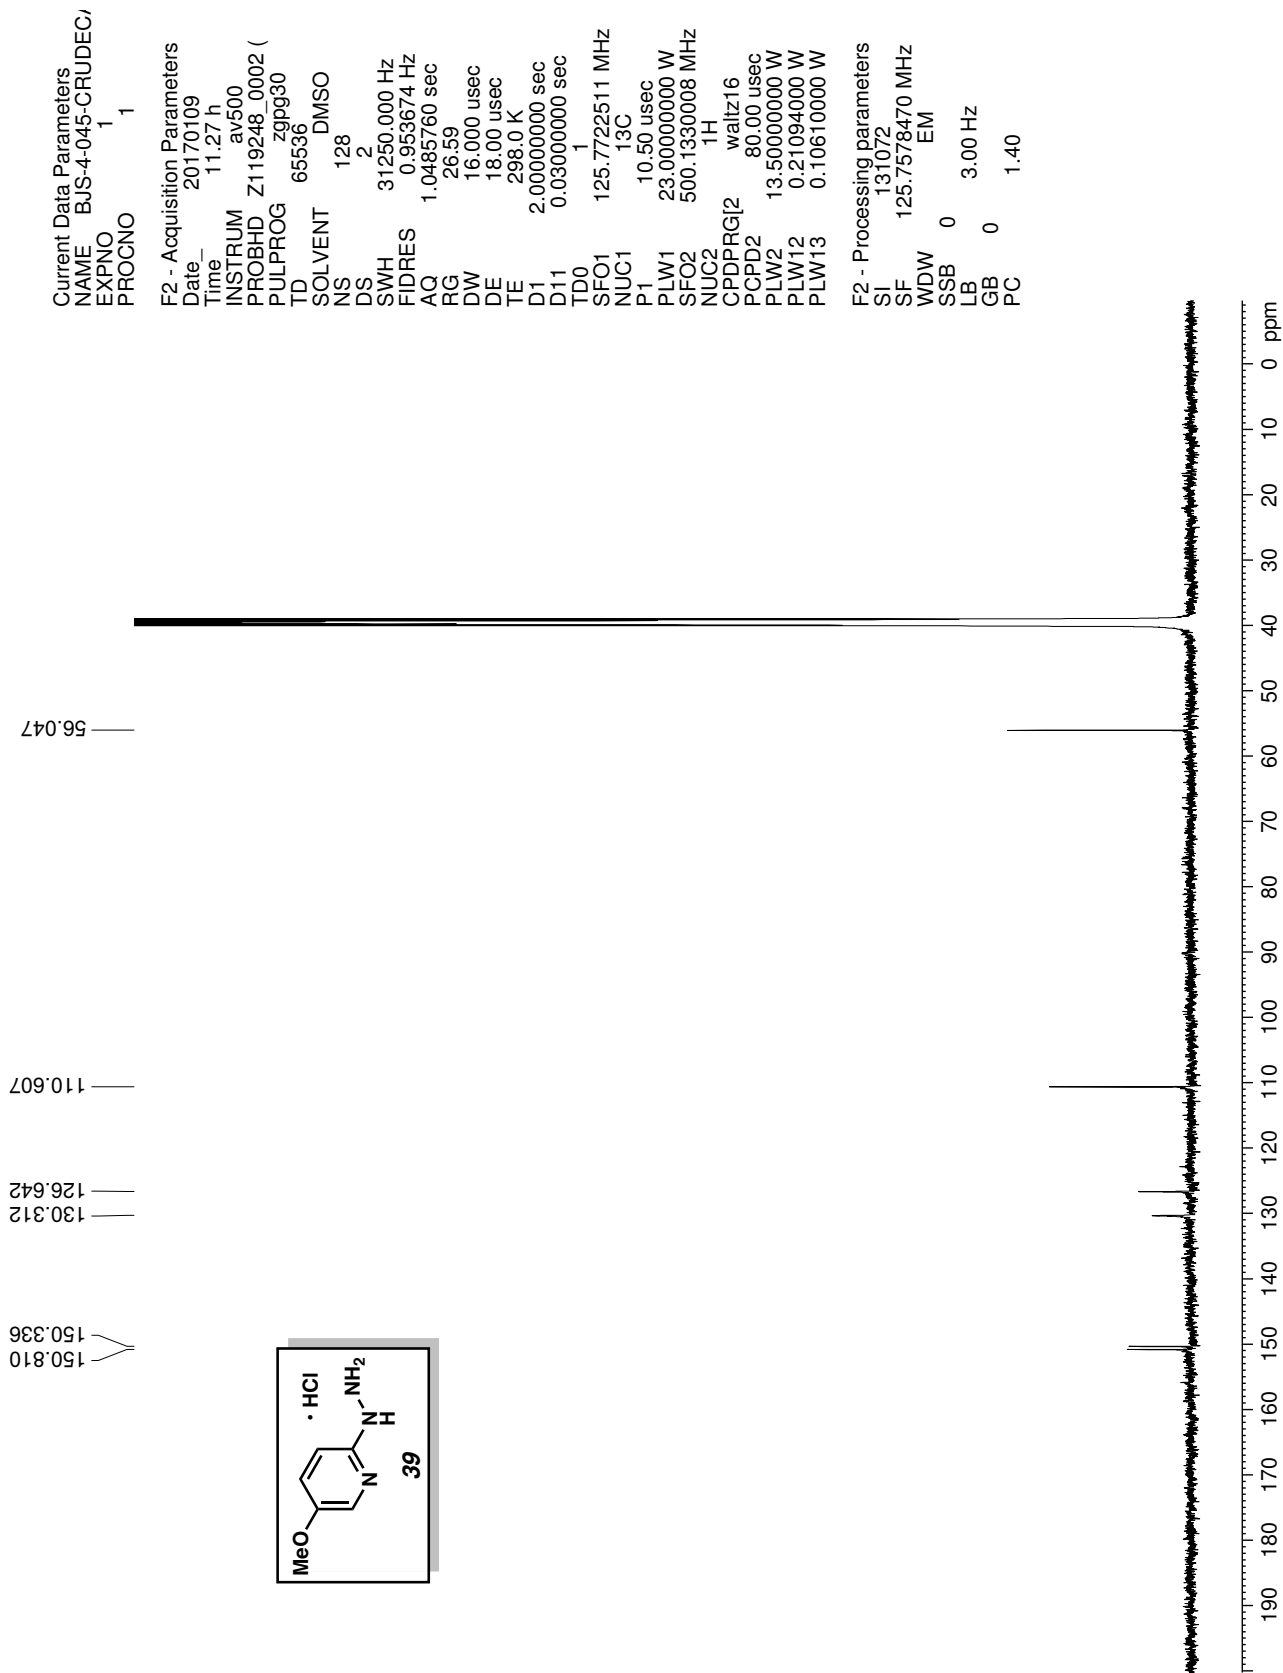

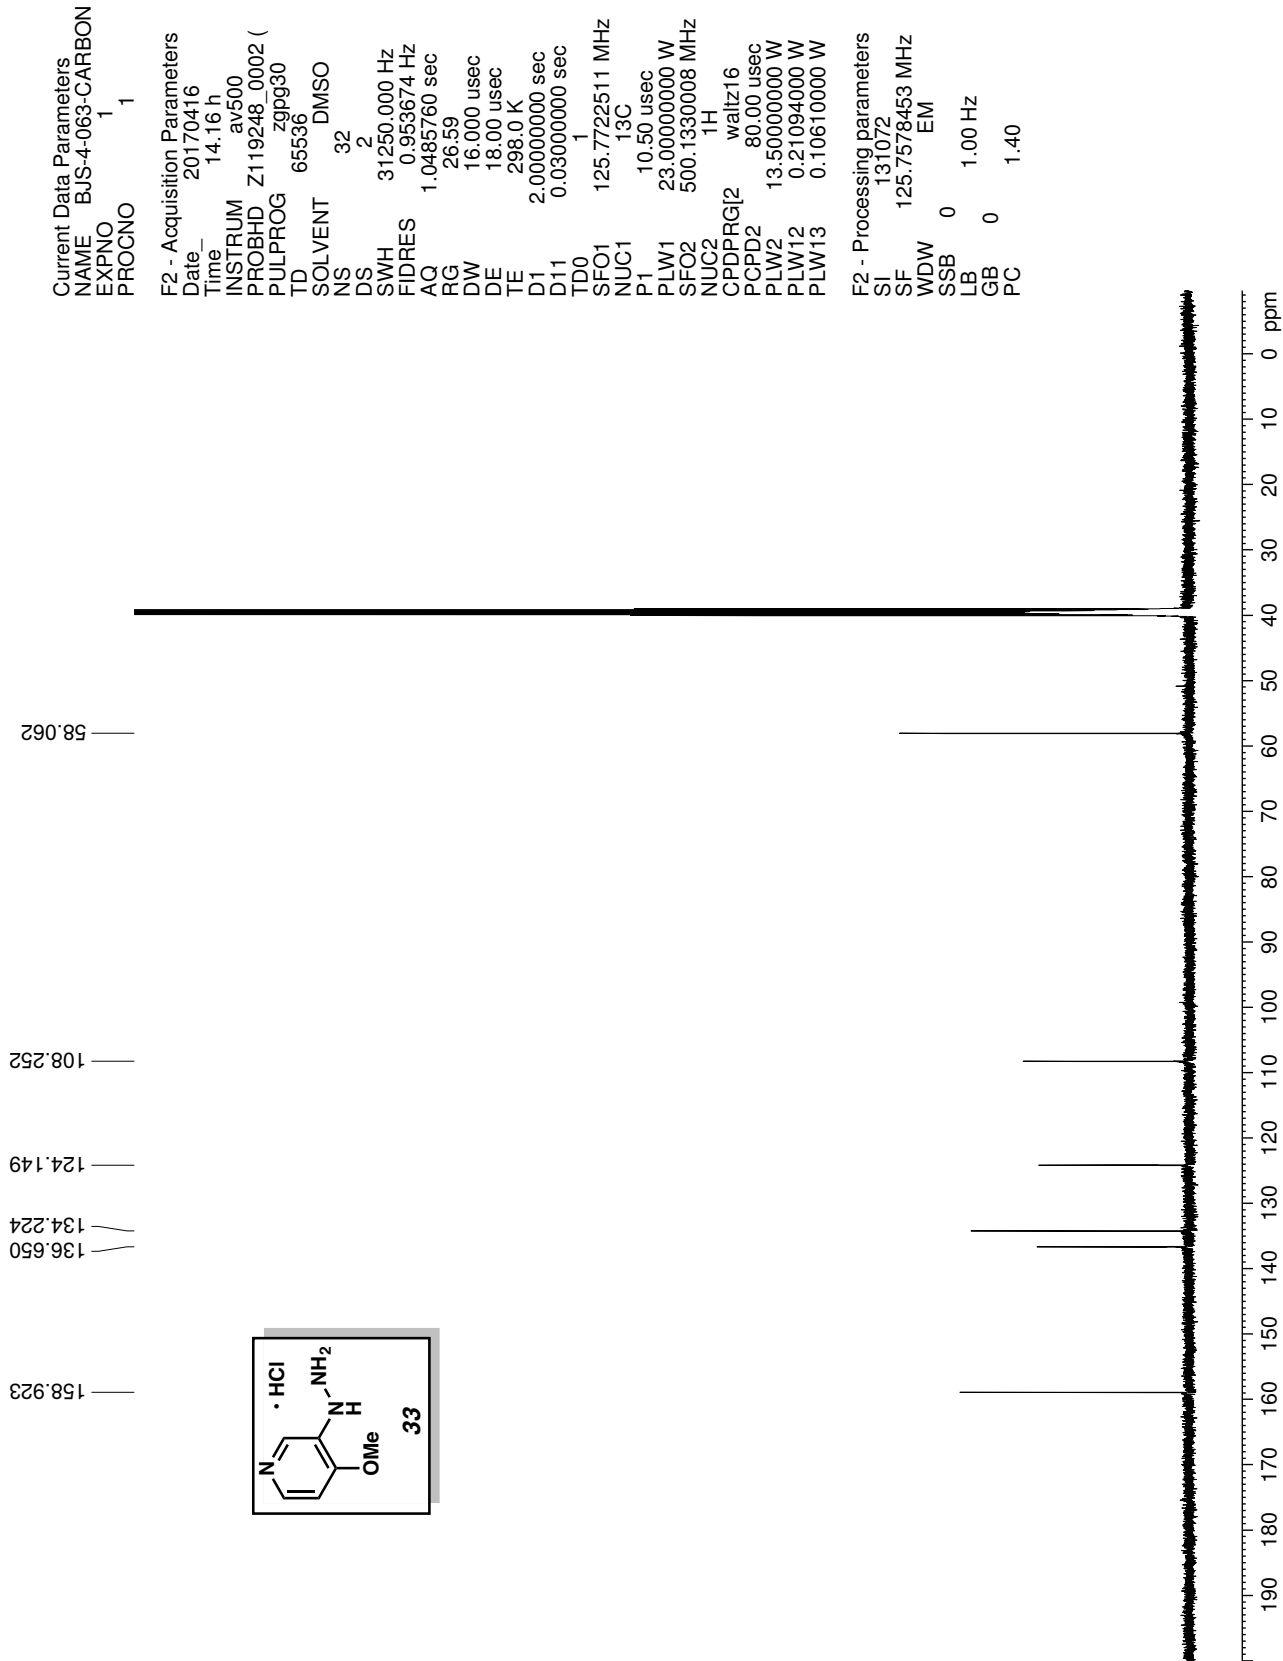

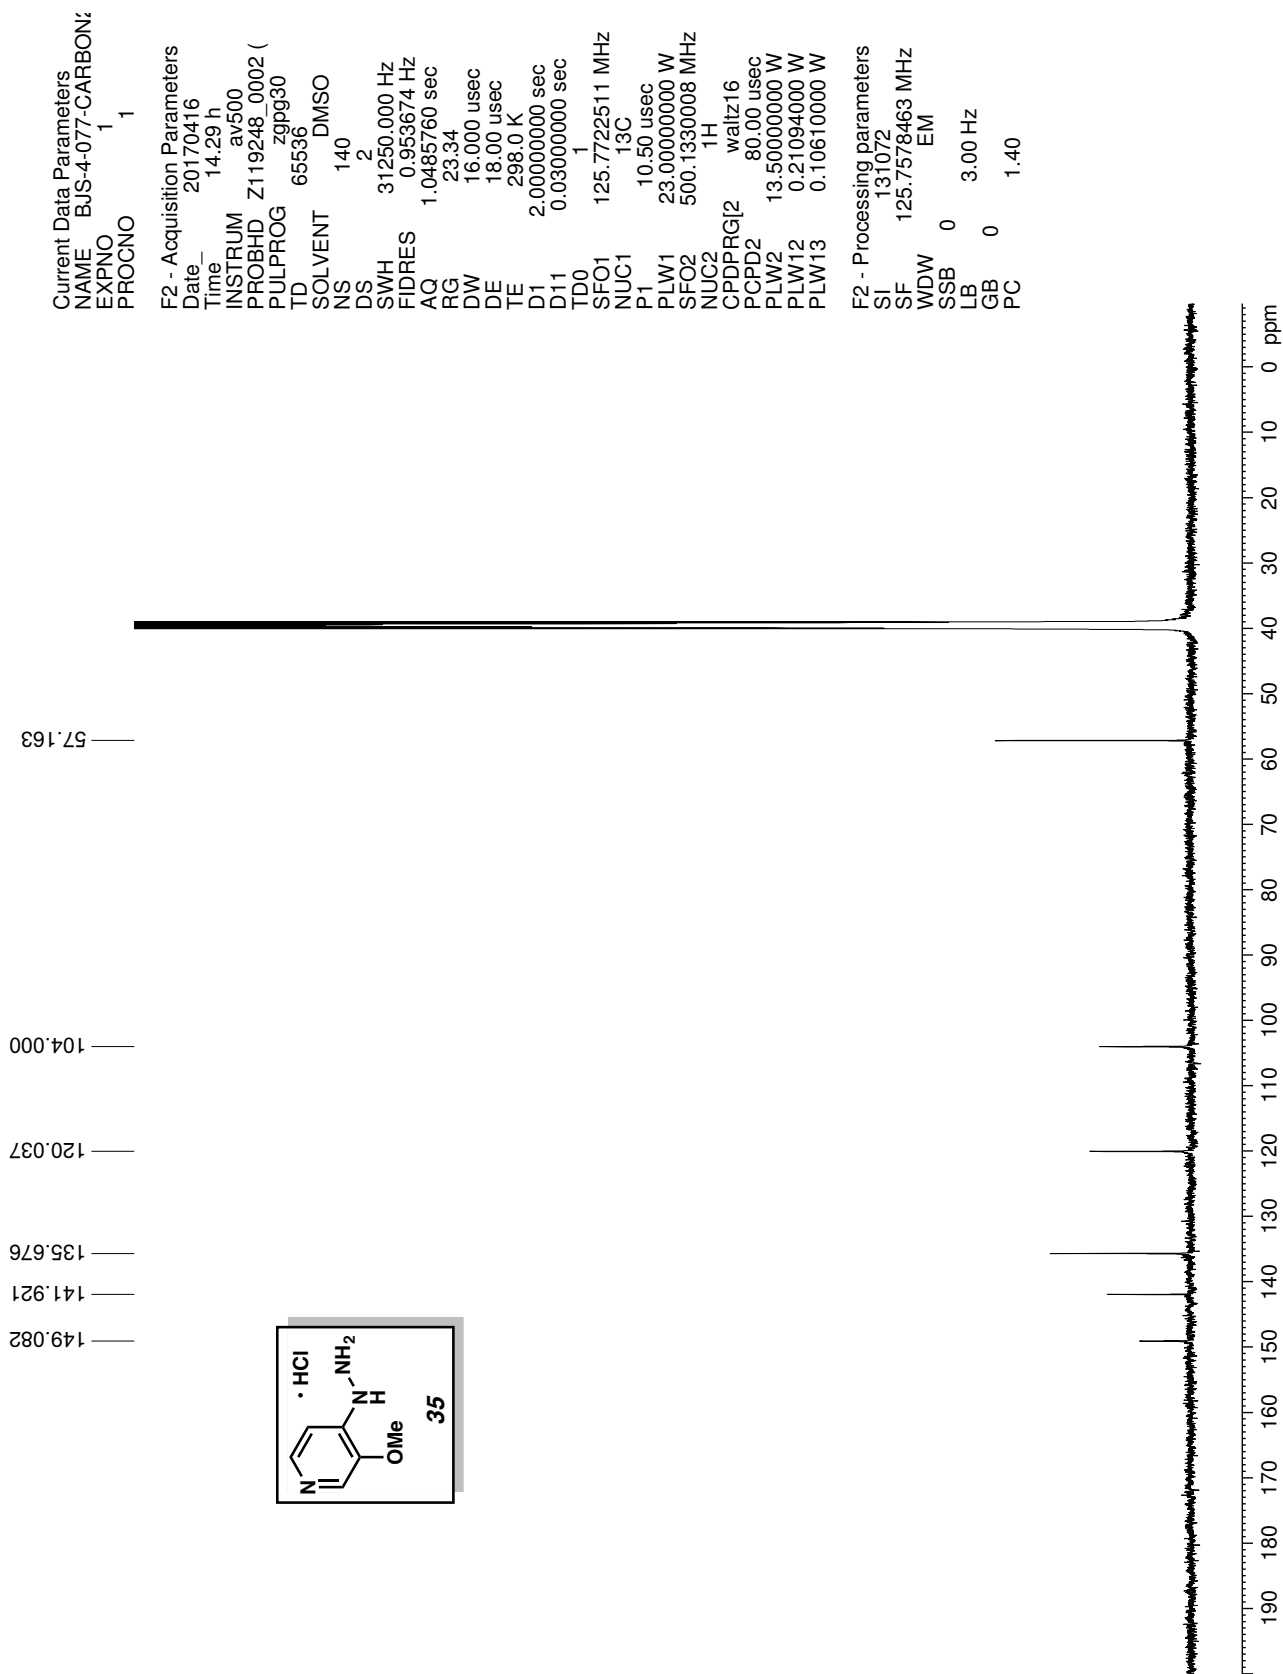

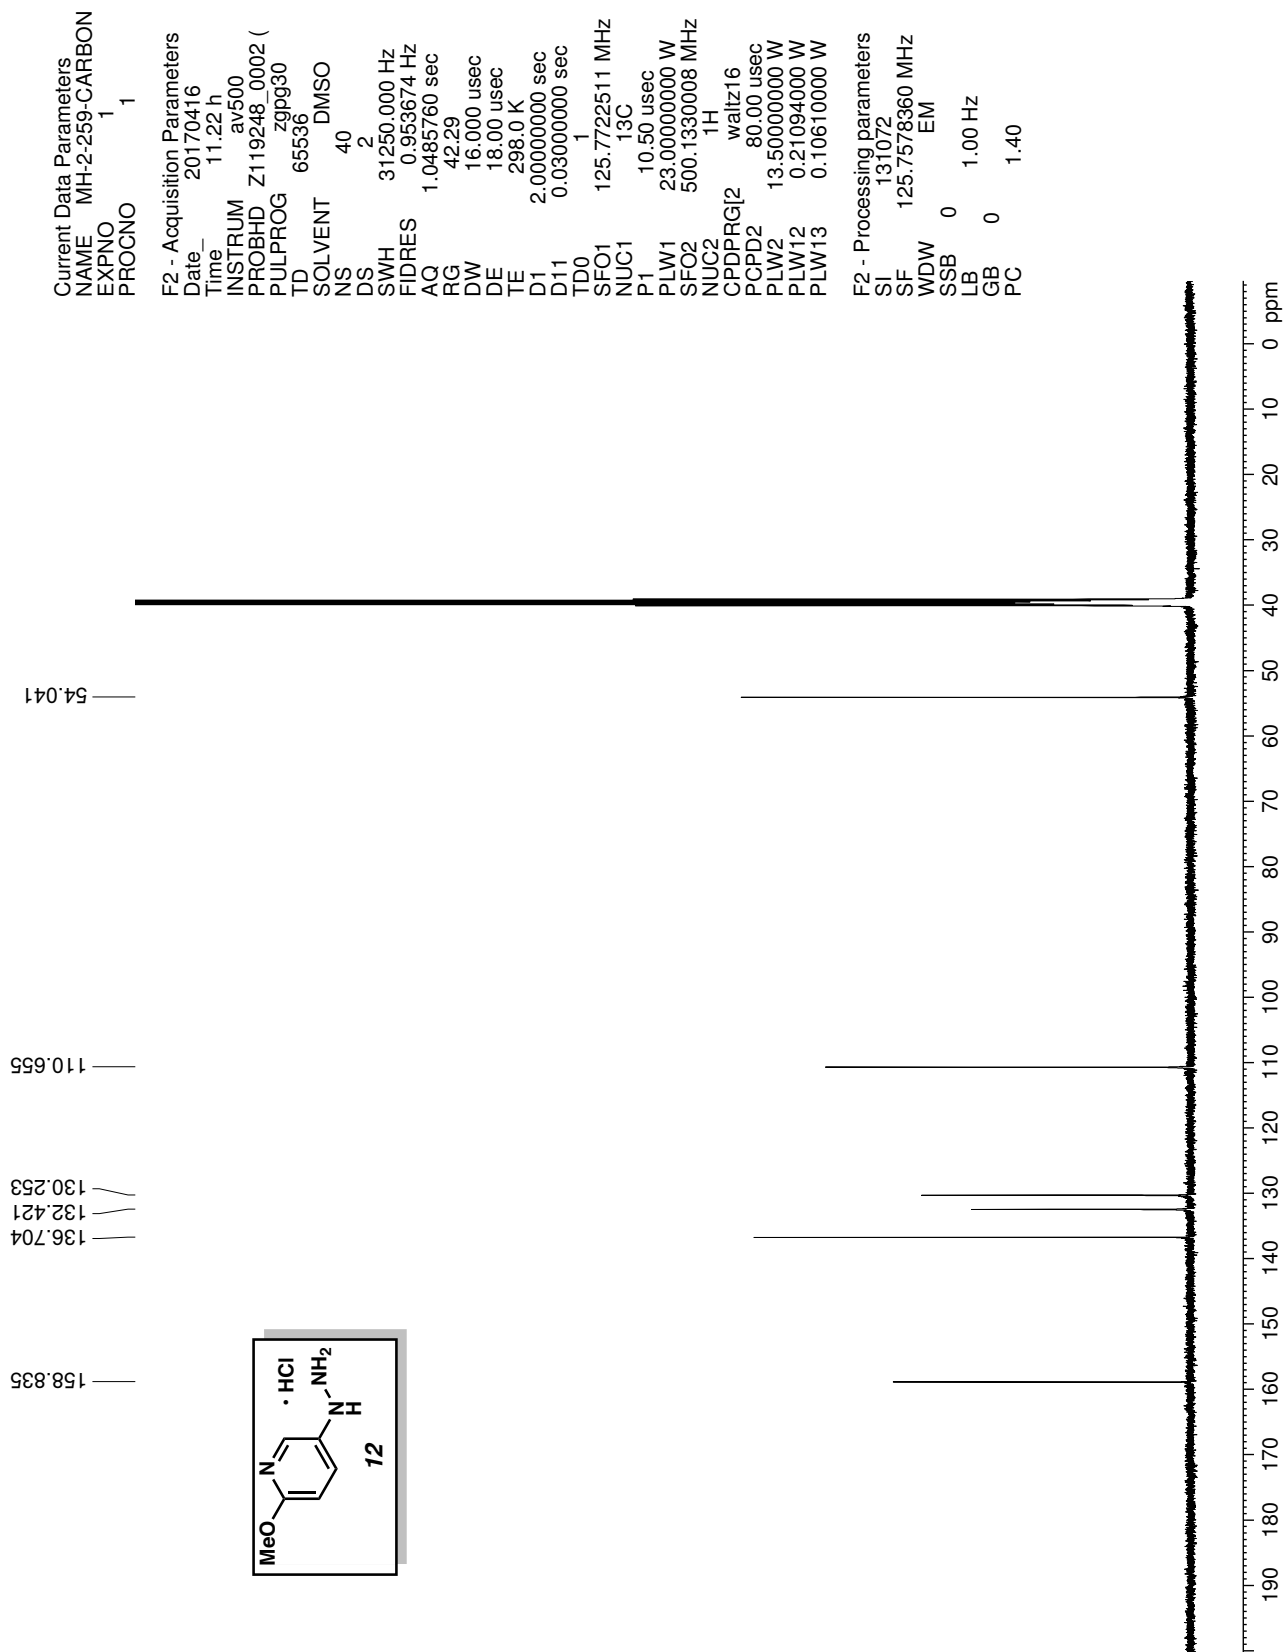



142.079  
136.861  
131.961  
127.684  
125.421

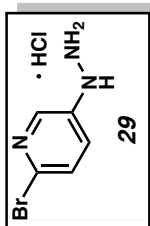

Current Data Parameters  
 NAME BJS-4-130-CARBON  
 EXPNO 1  
 PROCNO 1

F2 - Acquisition Parameters  
 Date\_ 20170416  
 Time\_ 11.36 h  
 INSTRUM av500  
 PROBDH Z119248\_0002 ( )  
 PULPROG zgpg30  
 TD 65536  
 SOLVENT DMSO  
 NS 24  
 DS 2  
 SWH 31250.000 Hz  
 FIDRES 0.953674 Hz  
 AQ 1.0485760 sec  
 RG 52.41  
 DW 16.000 usec  
 DE 18.00 usec  
 TE 298.0 K  
 D1 2.00000000 sec  
 D11 0.03000000 sec  
 TD0 1  
 SFO1 125.7722511 MHz  
 NUC1 13C  
 P1 10.50 usec  
 PLW1 23.00000000 W  
 SFO2 500.1330008 MHz  
 NUC2 1H  
 CPDPRG[2] waltz16  
 PCPD2 80.00 usec  
 PLW2 13.50000000 W  
 PLW12 0.21094000 W  
 PLW13 0.10610000 W

F2 - Processing parameters  
 SI 131072  
 SF 125.7578324 MHz  
 WDW EM  
 SSB 0  
 LB 0 1.00 Hz  
 GB 0  
 PC 1.40

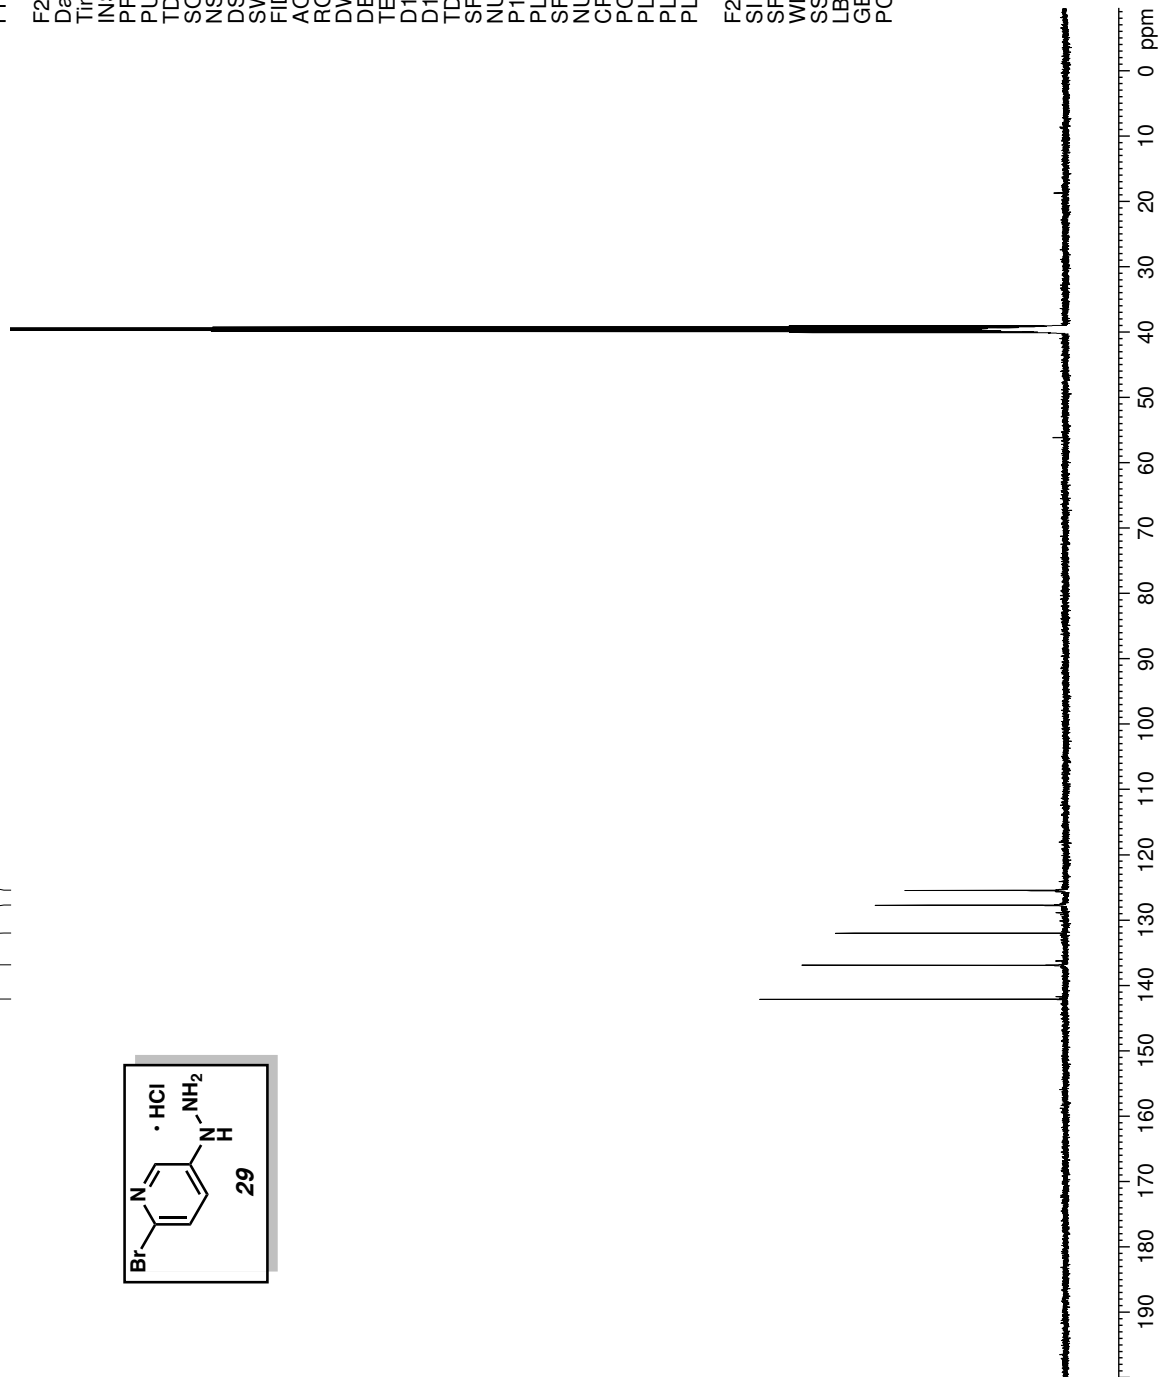

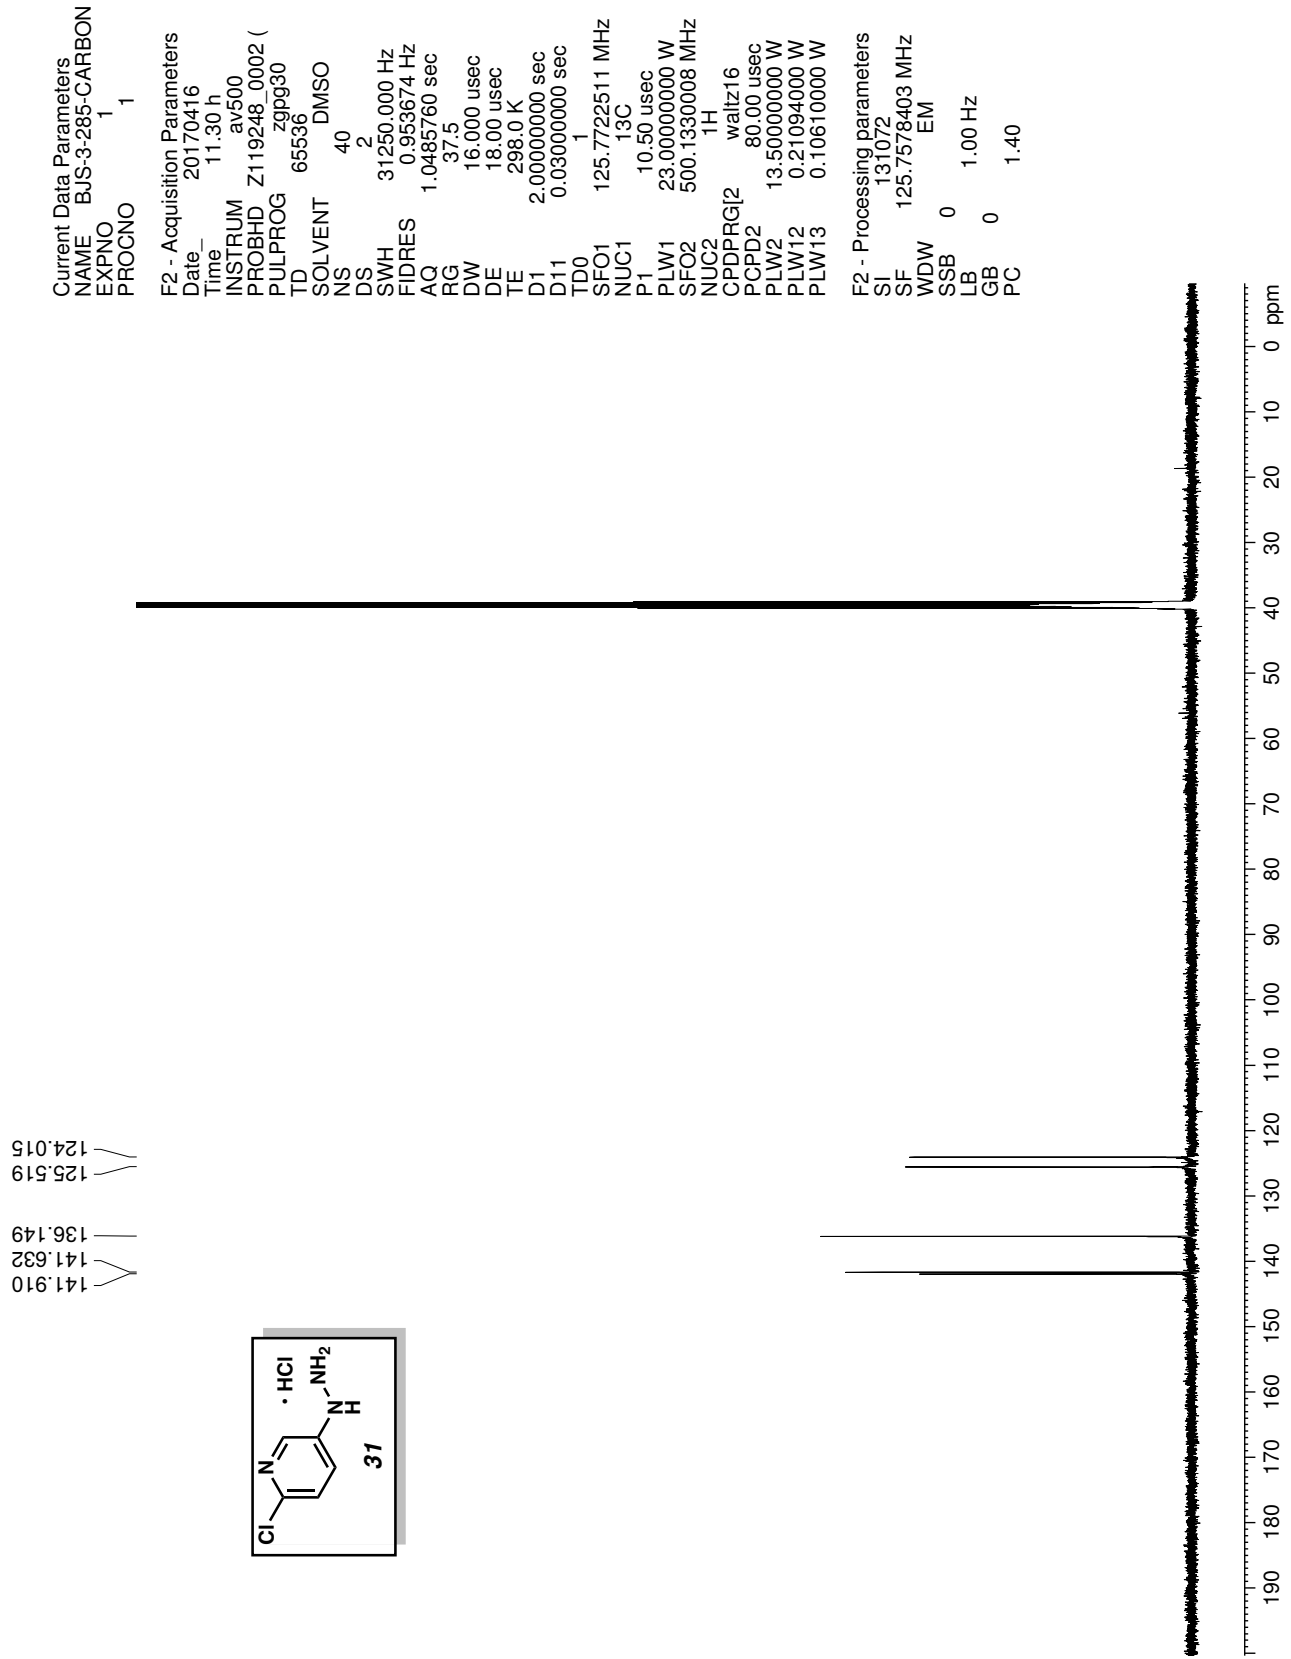

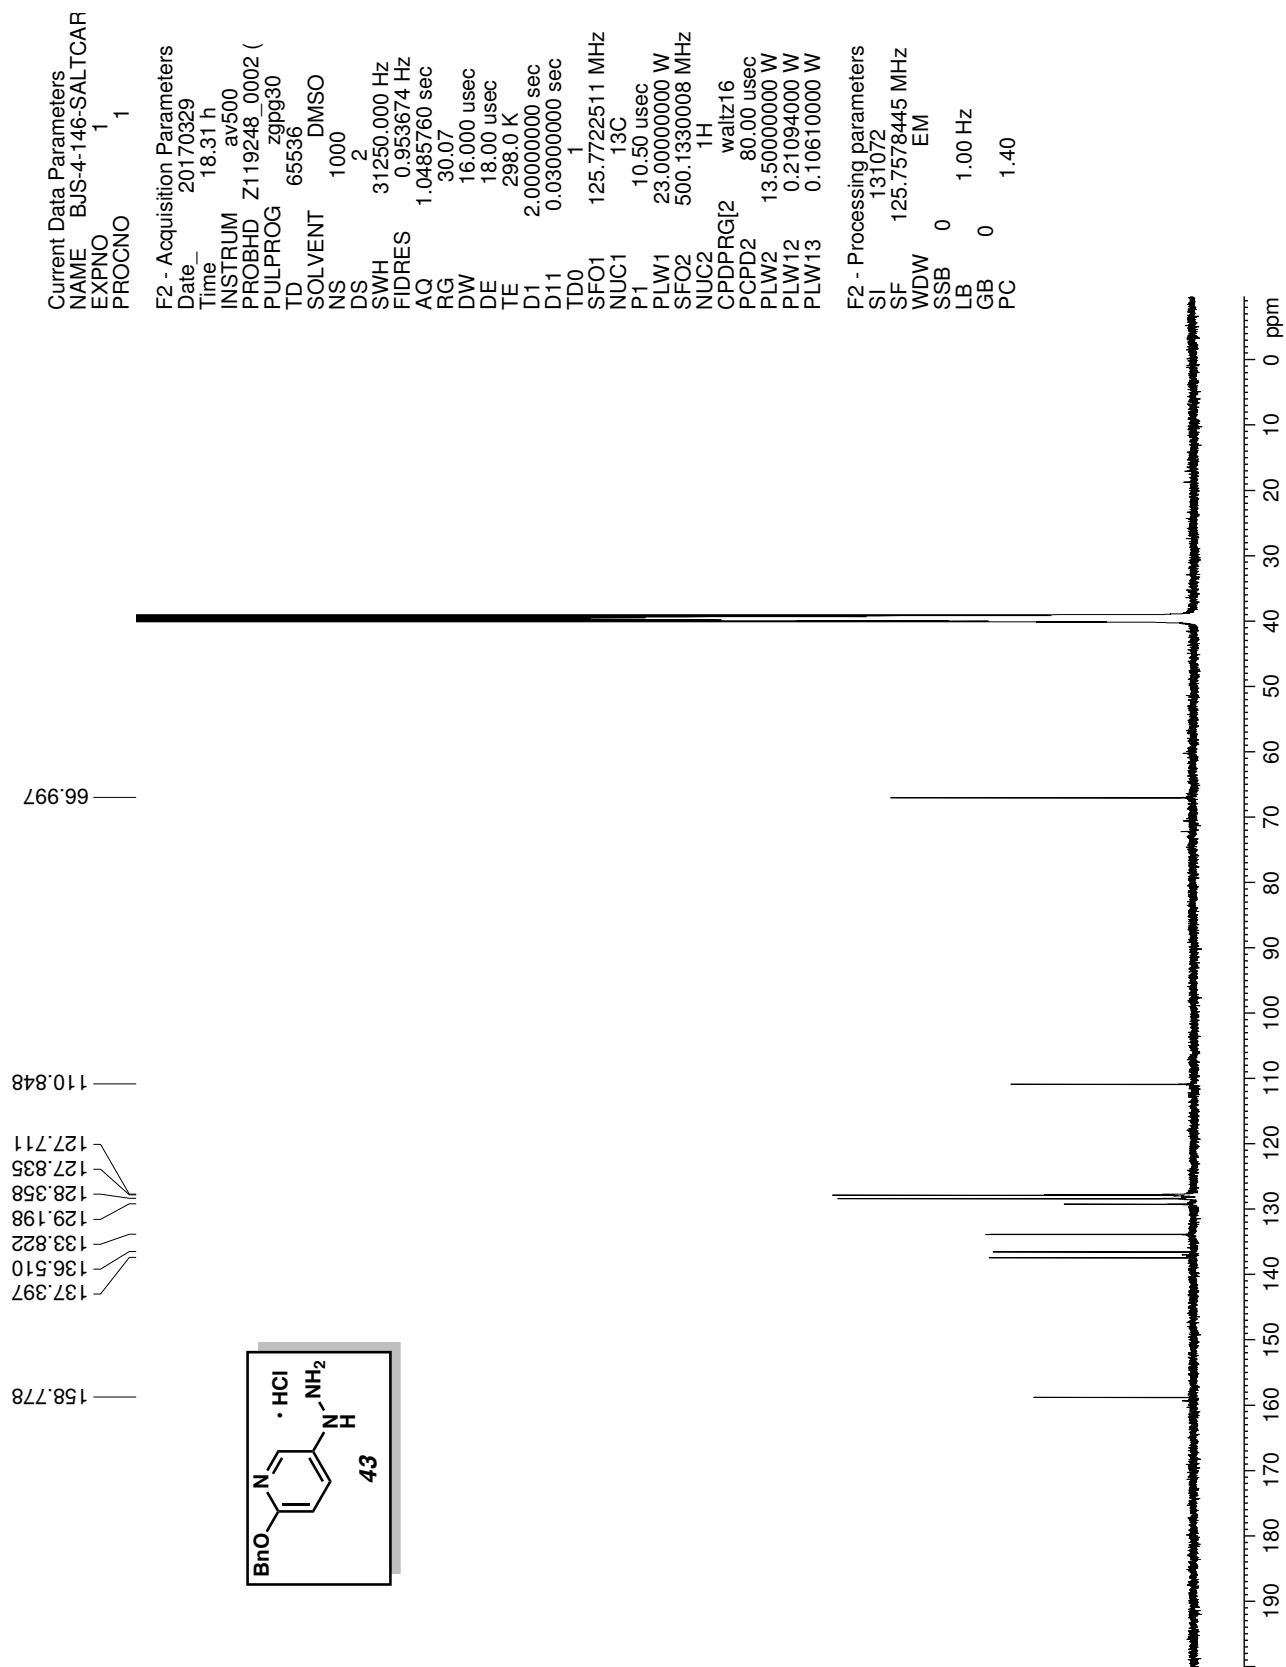

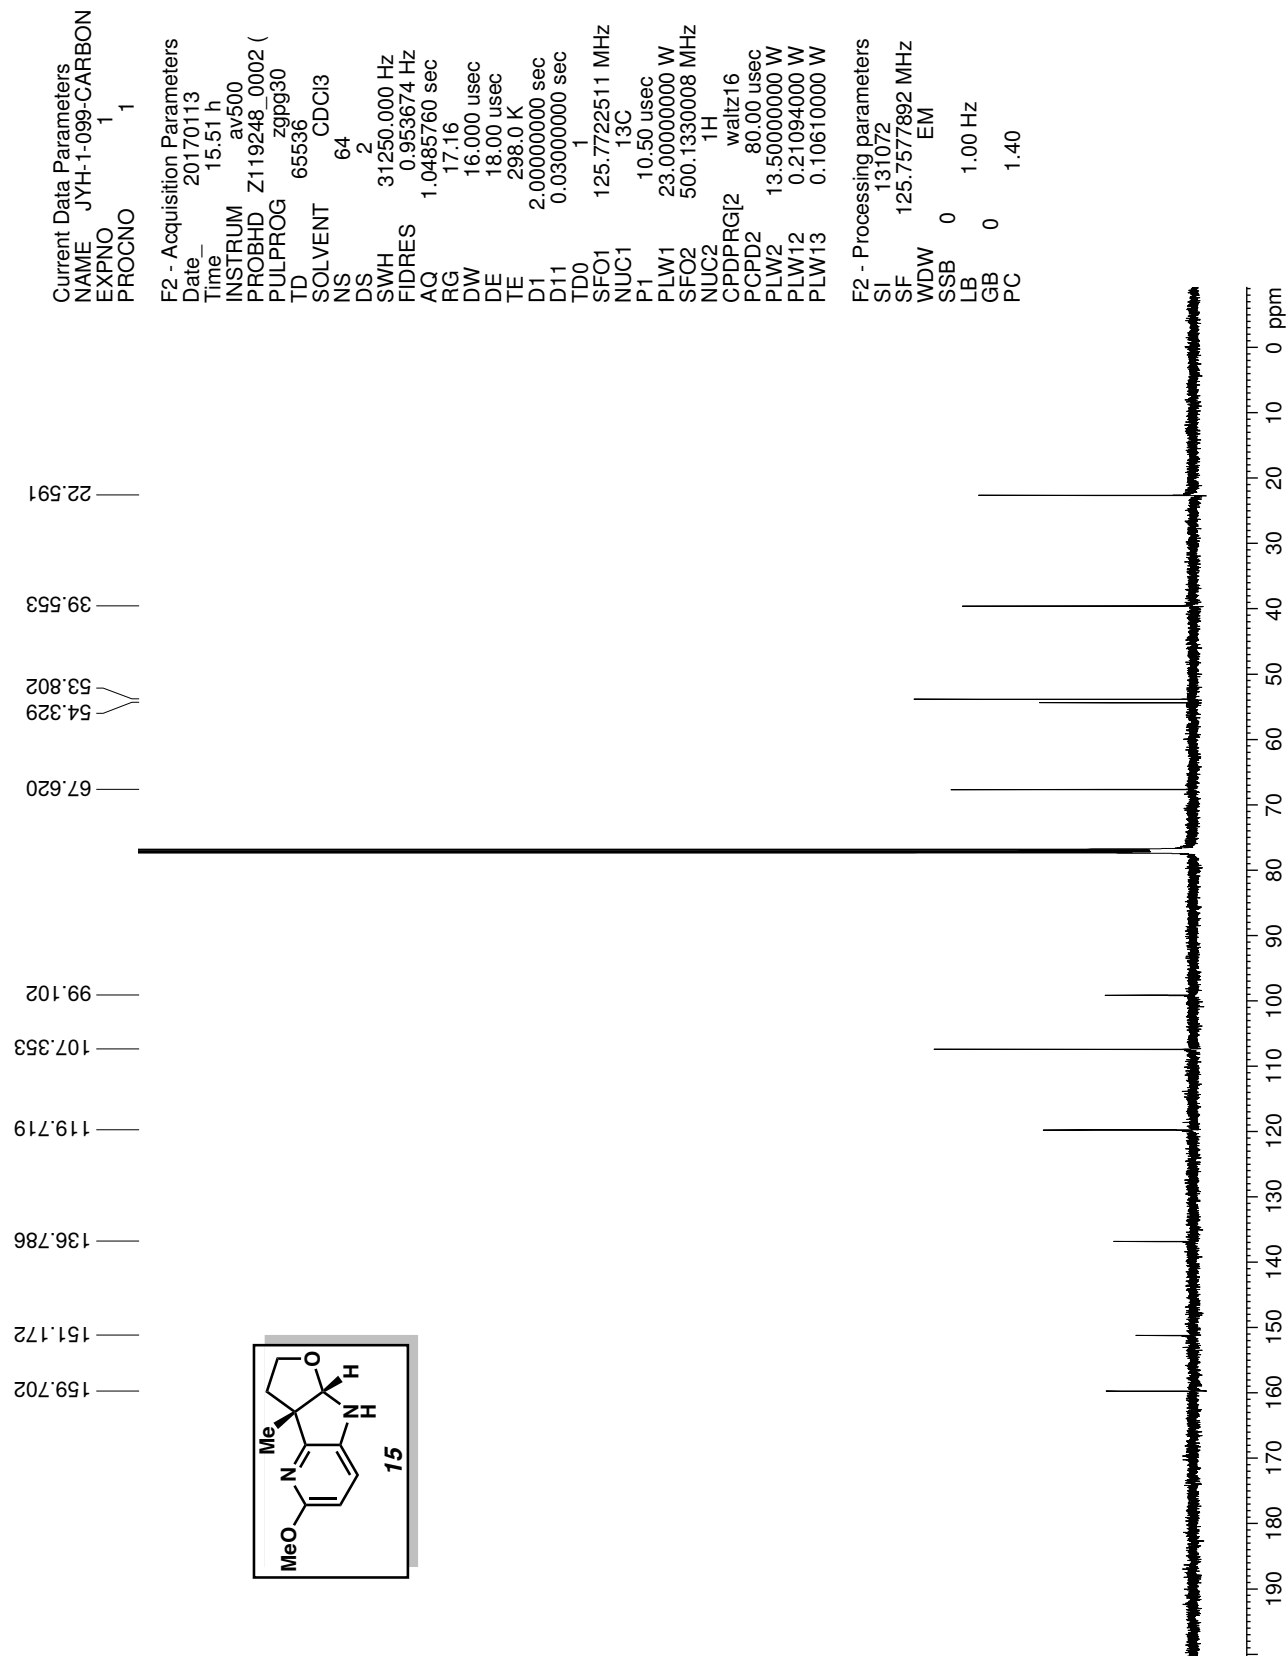

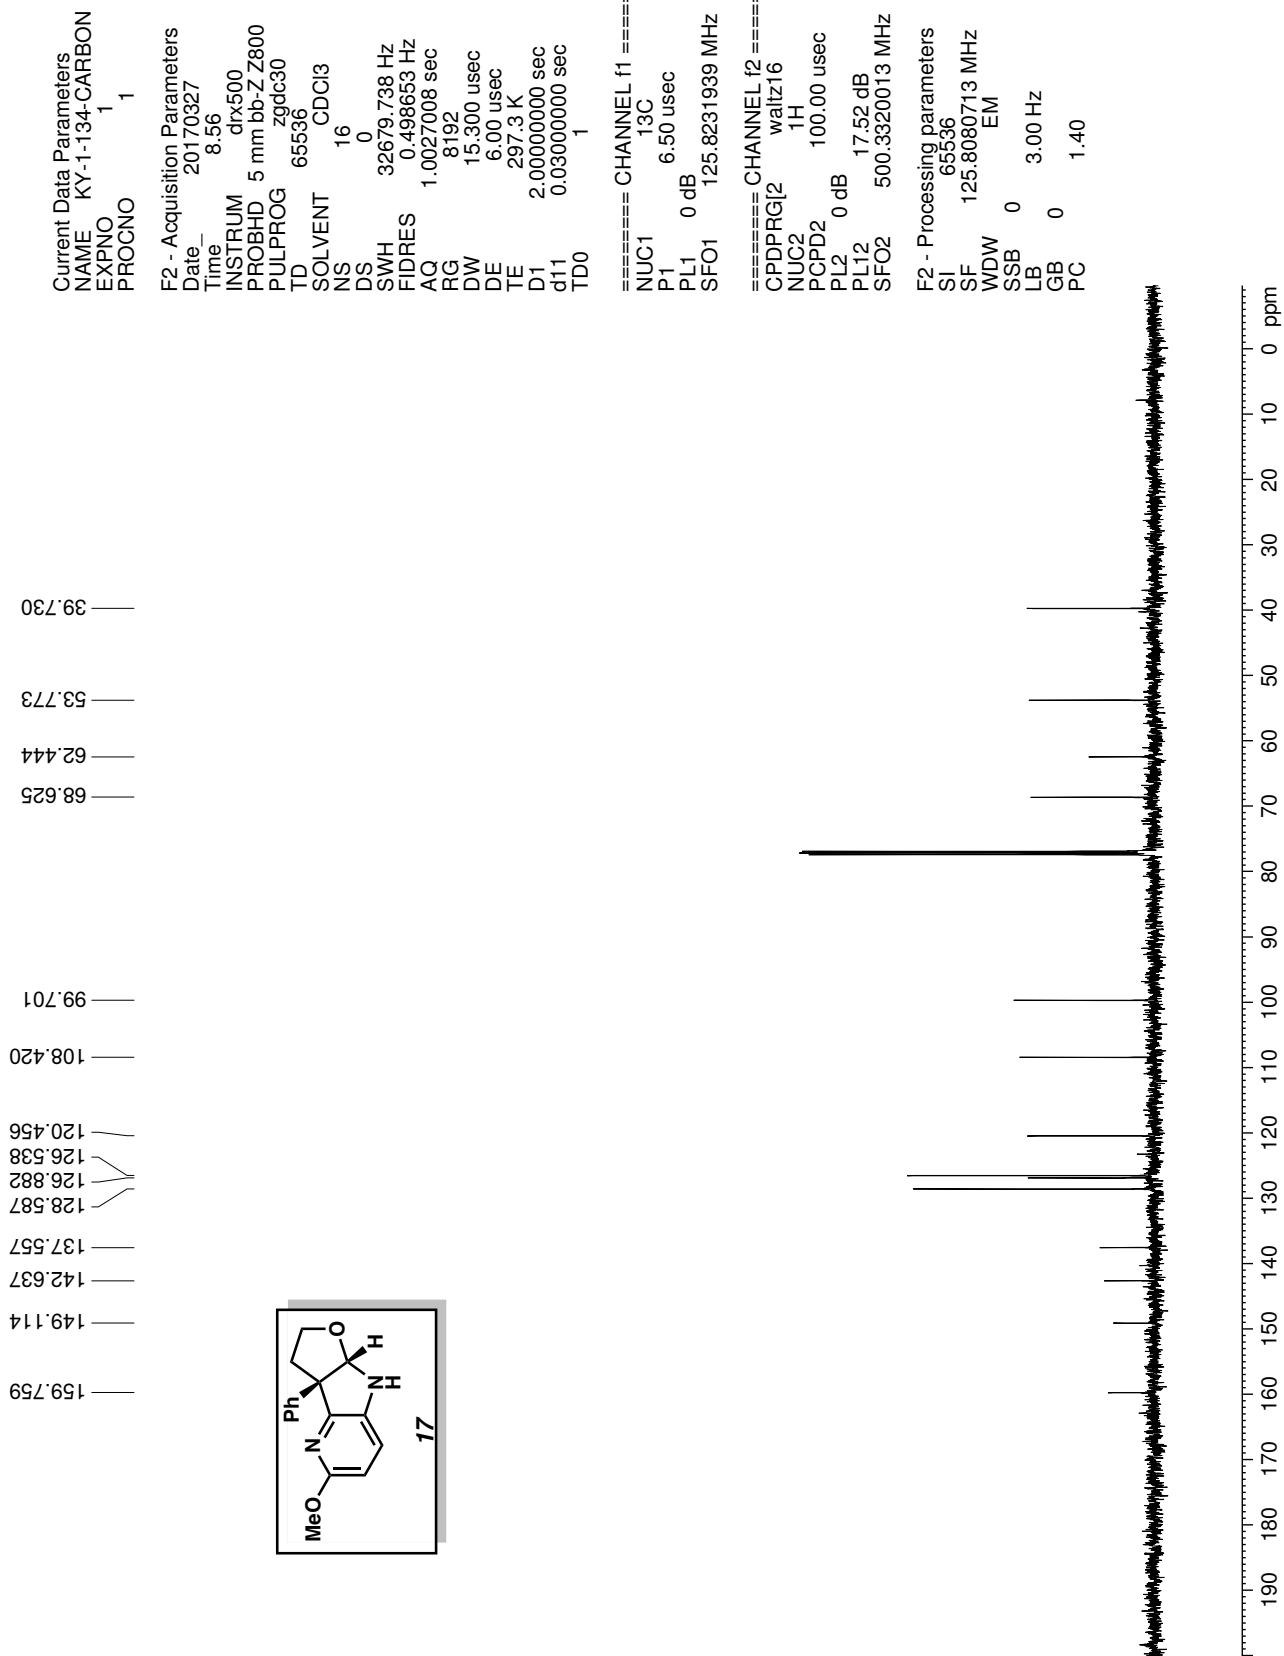

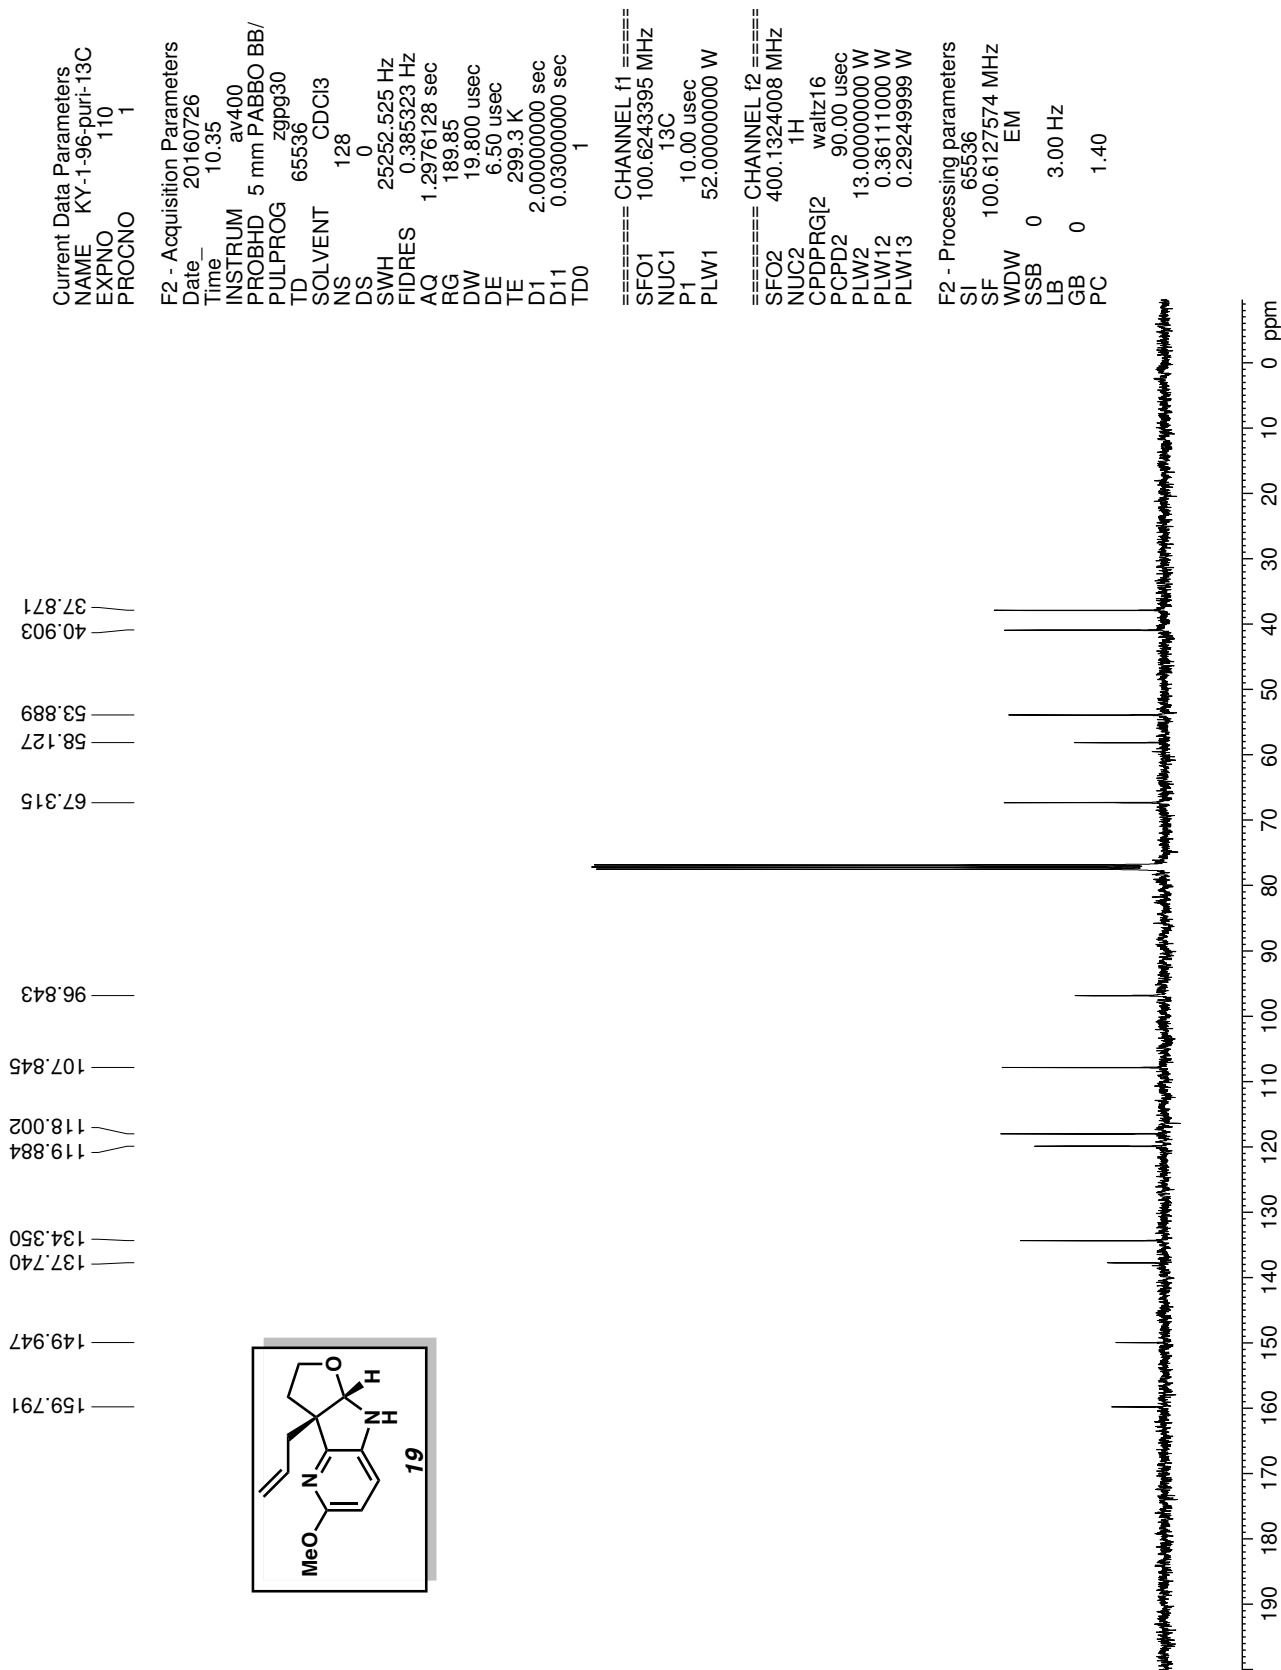

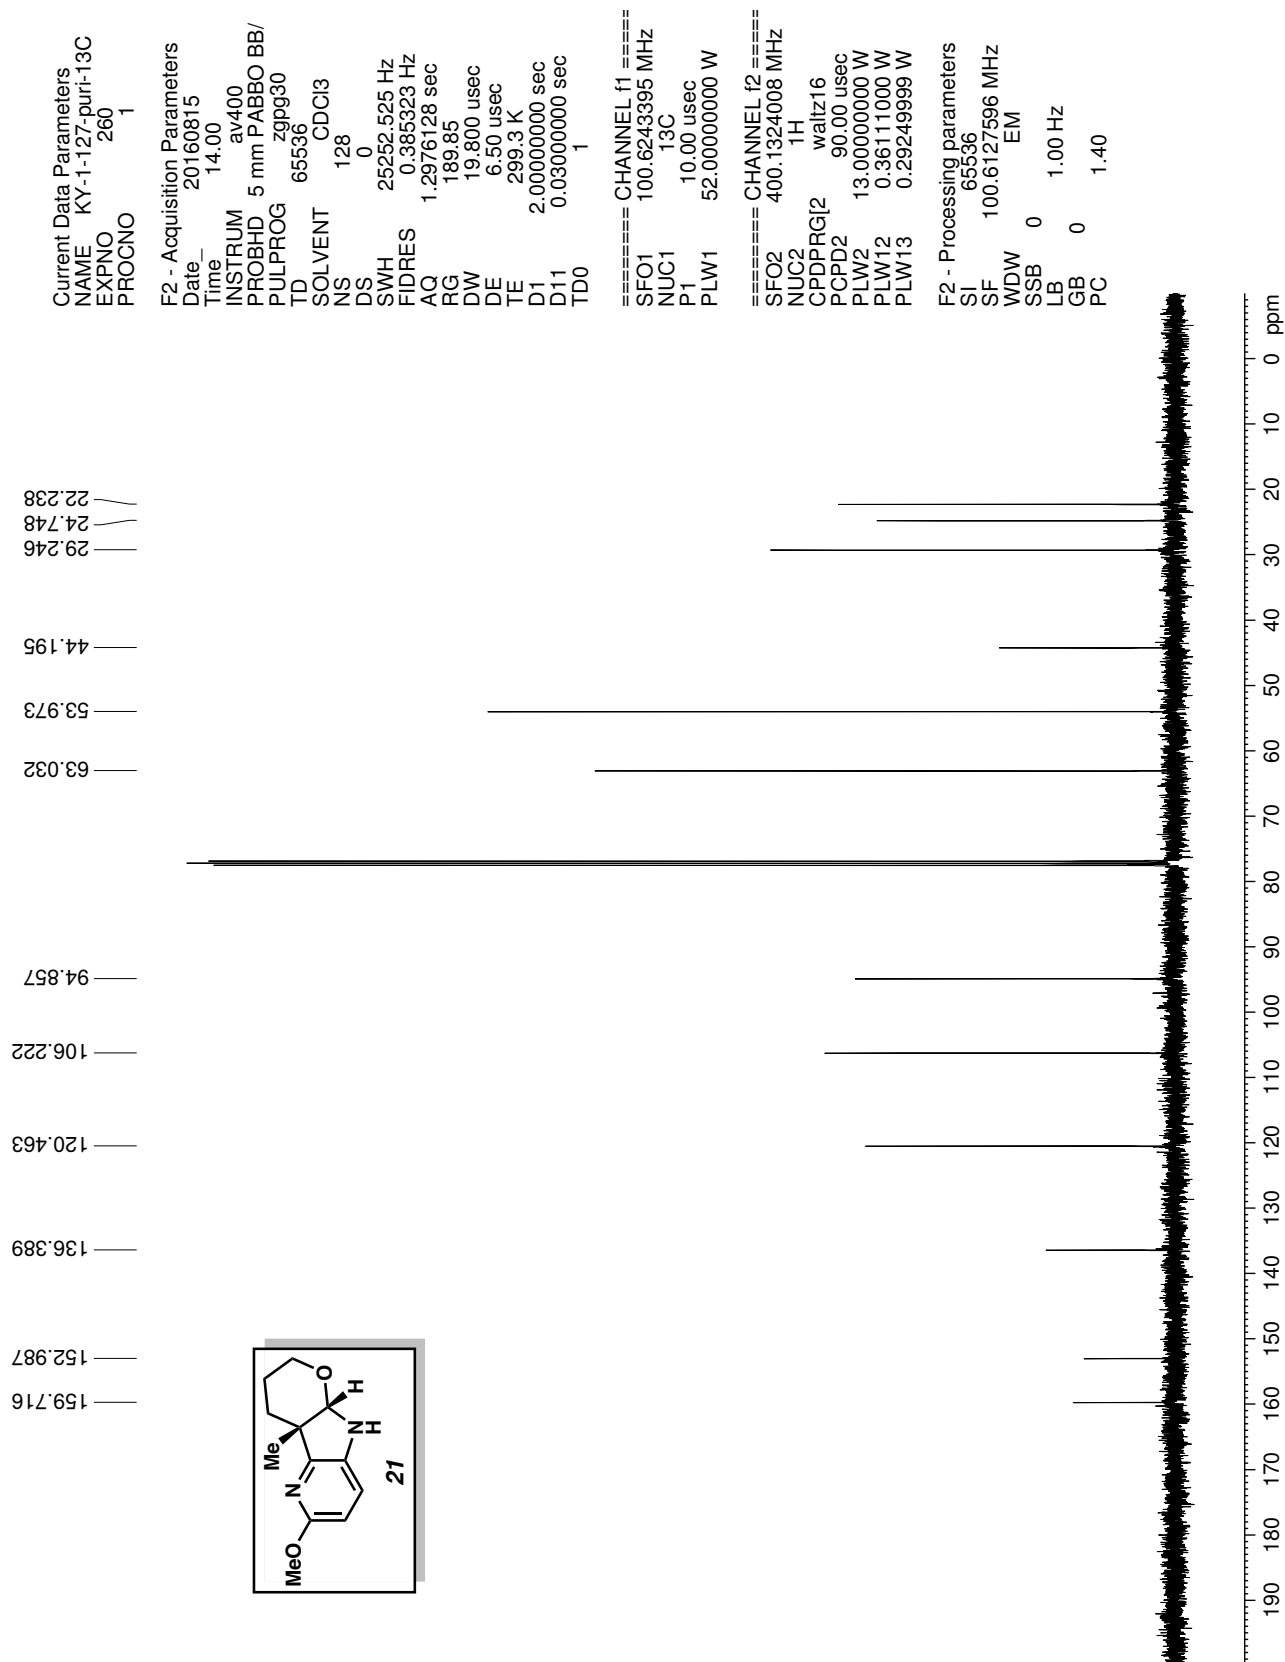

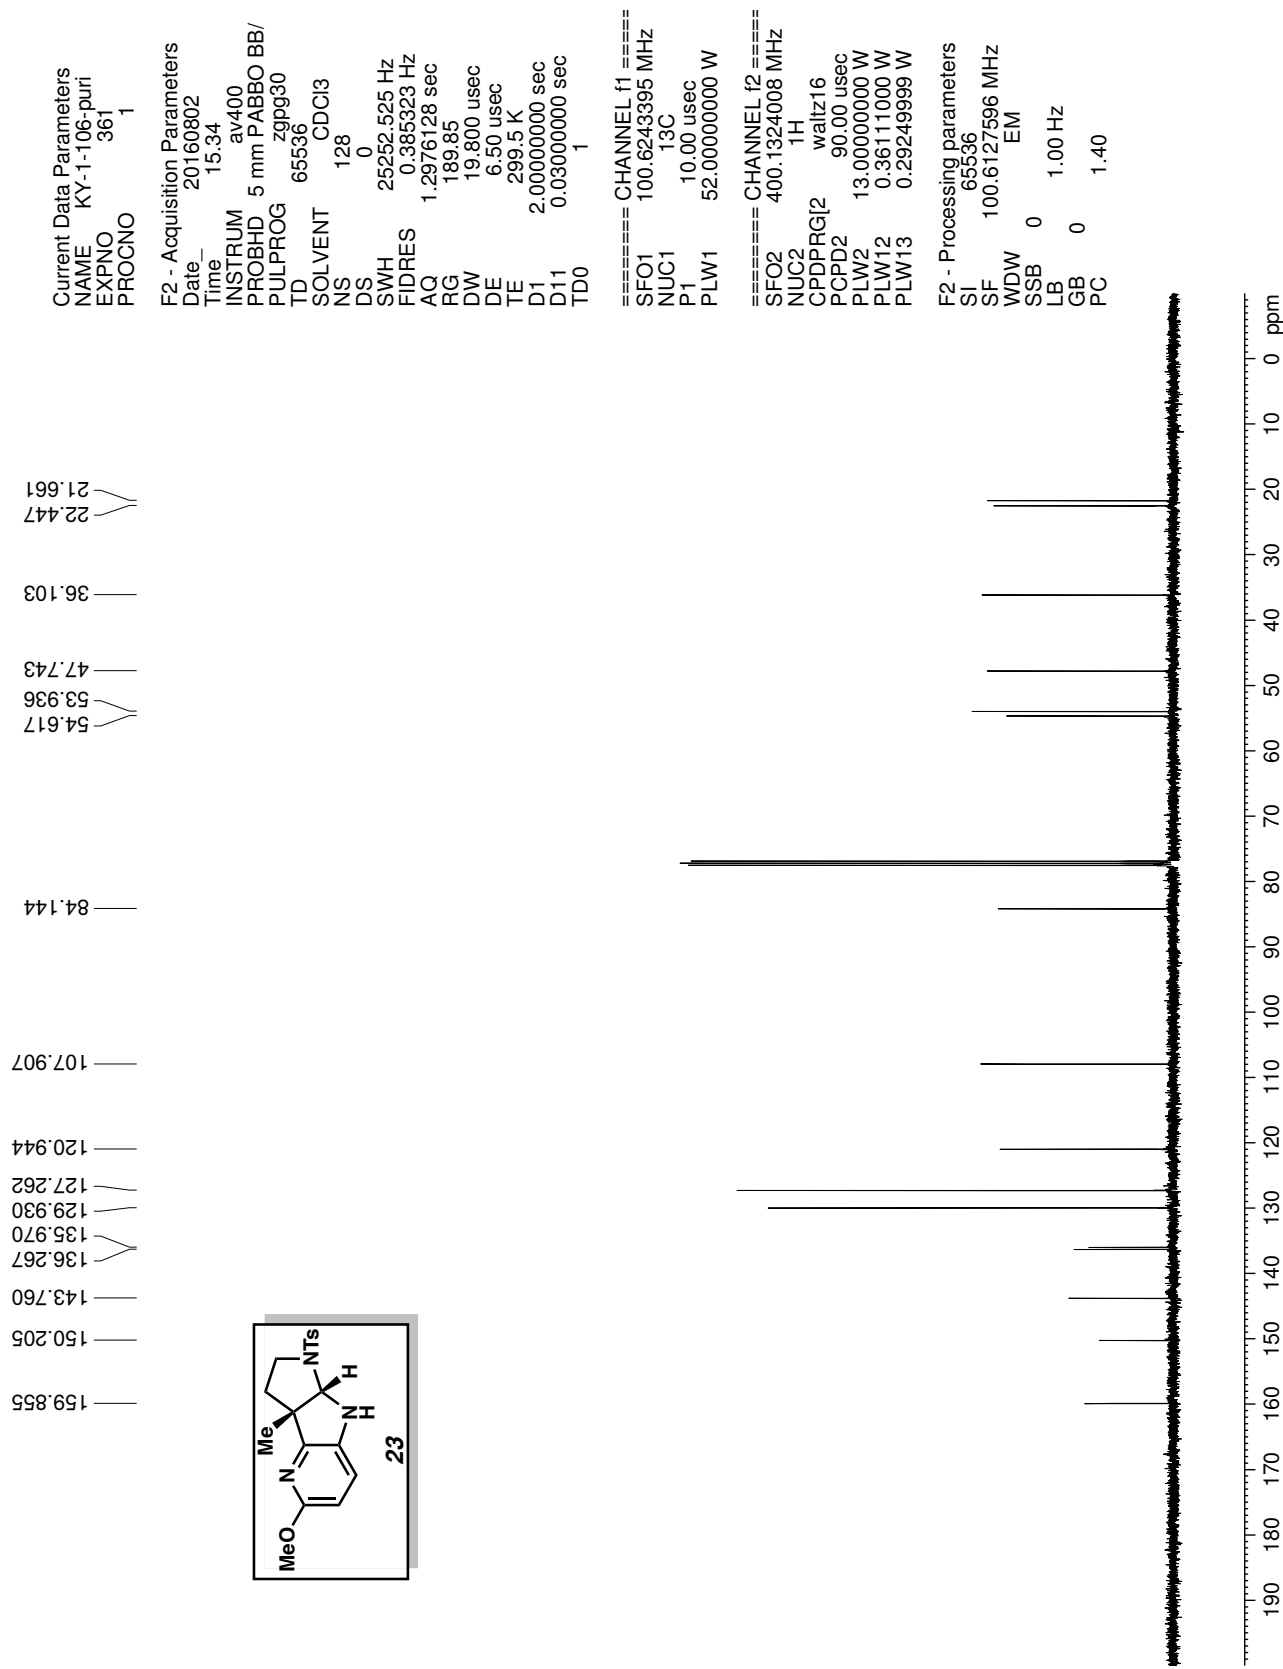



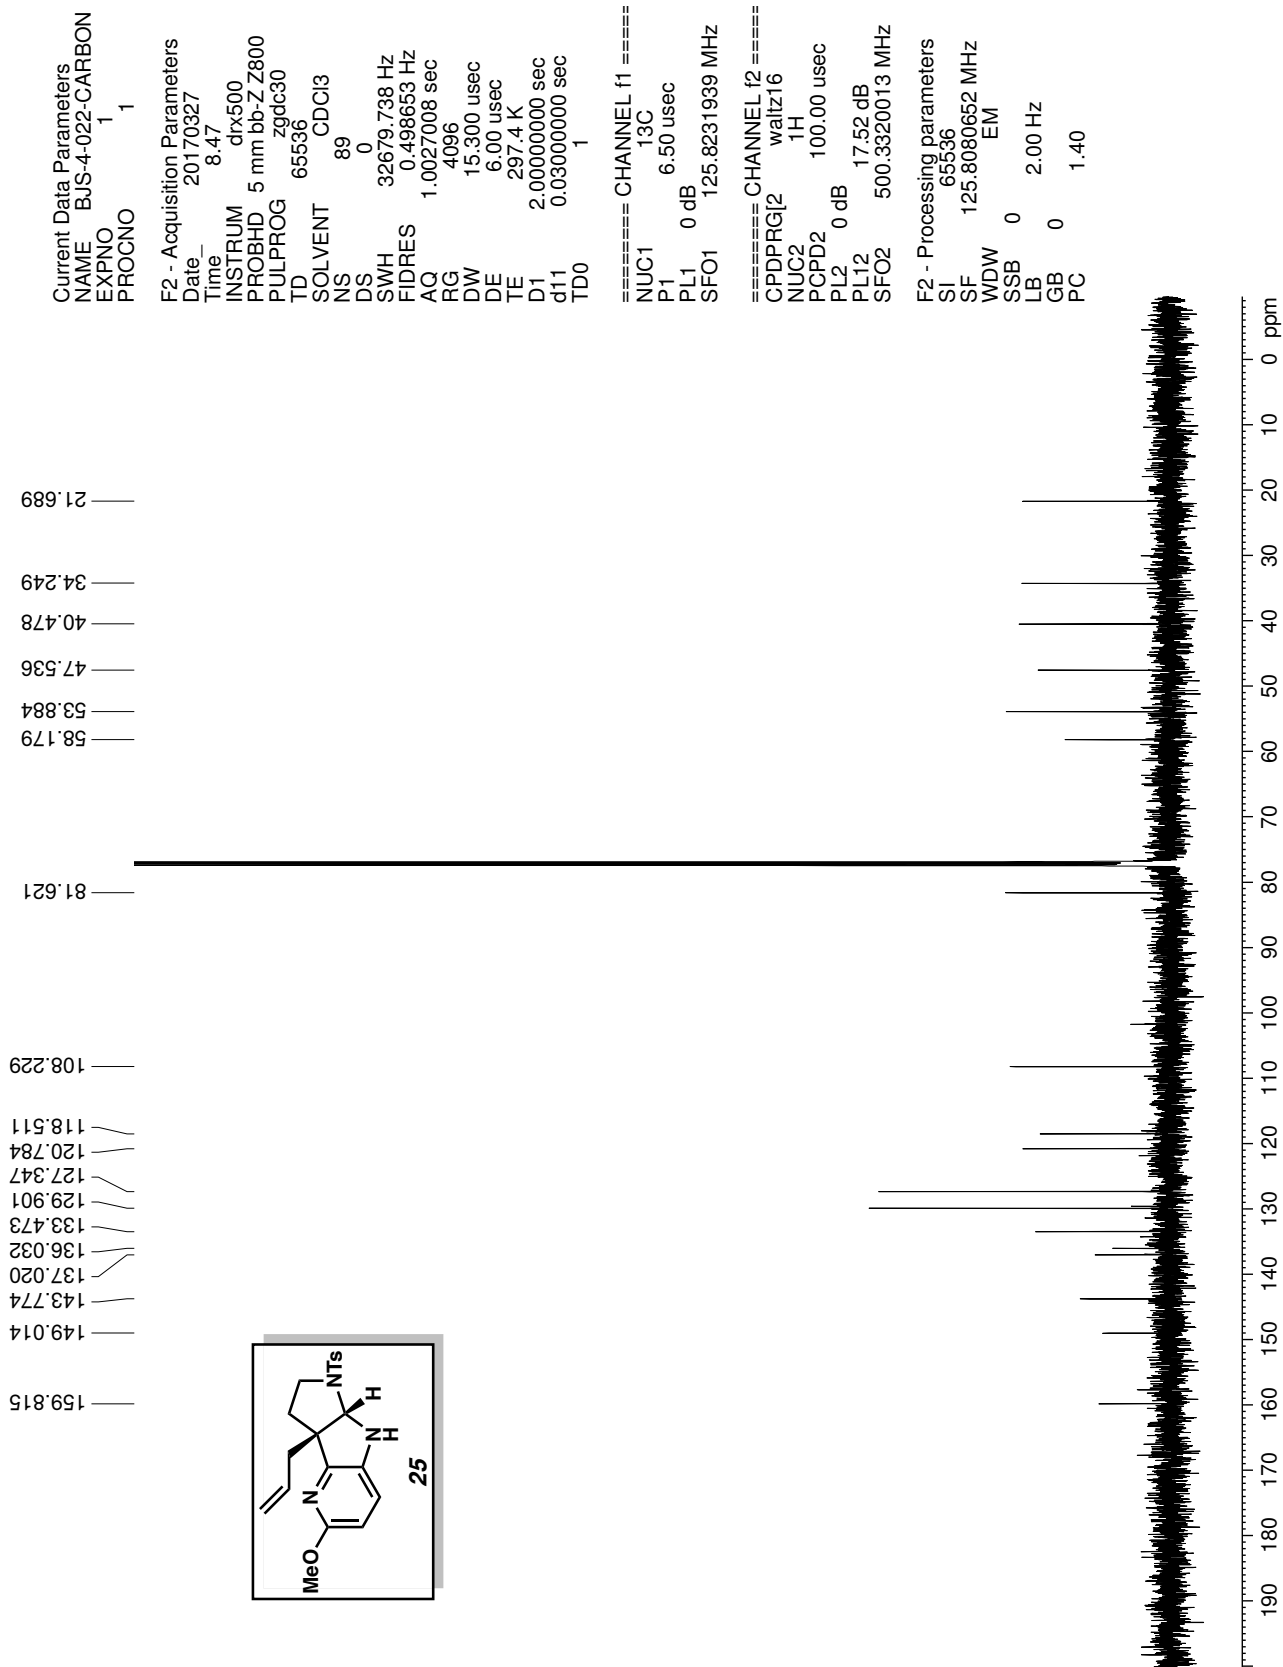

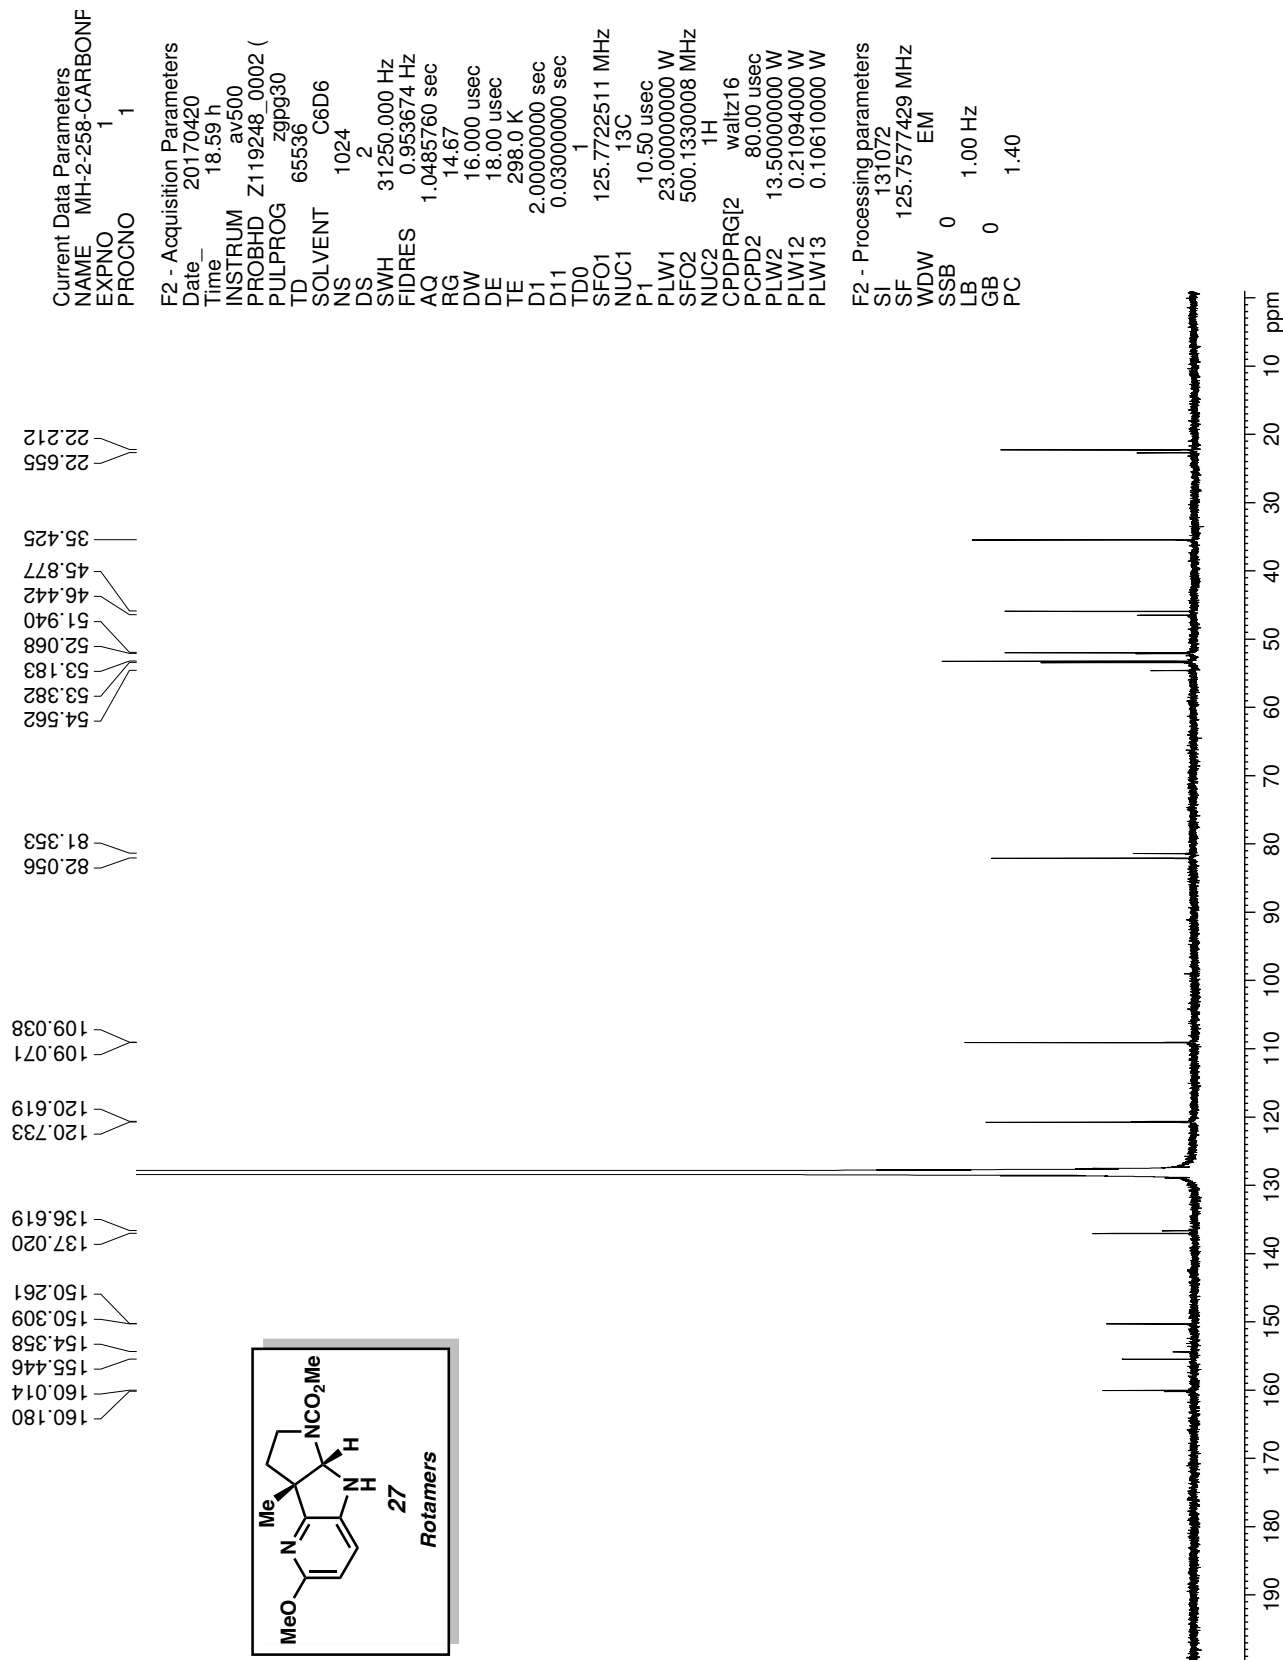

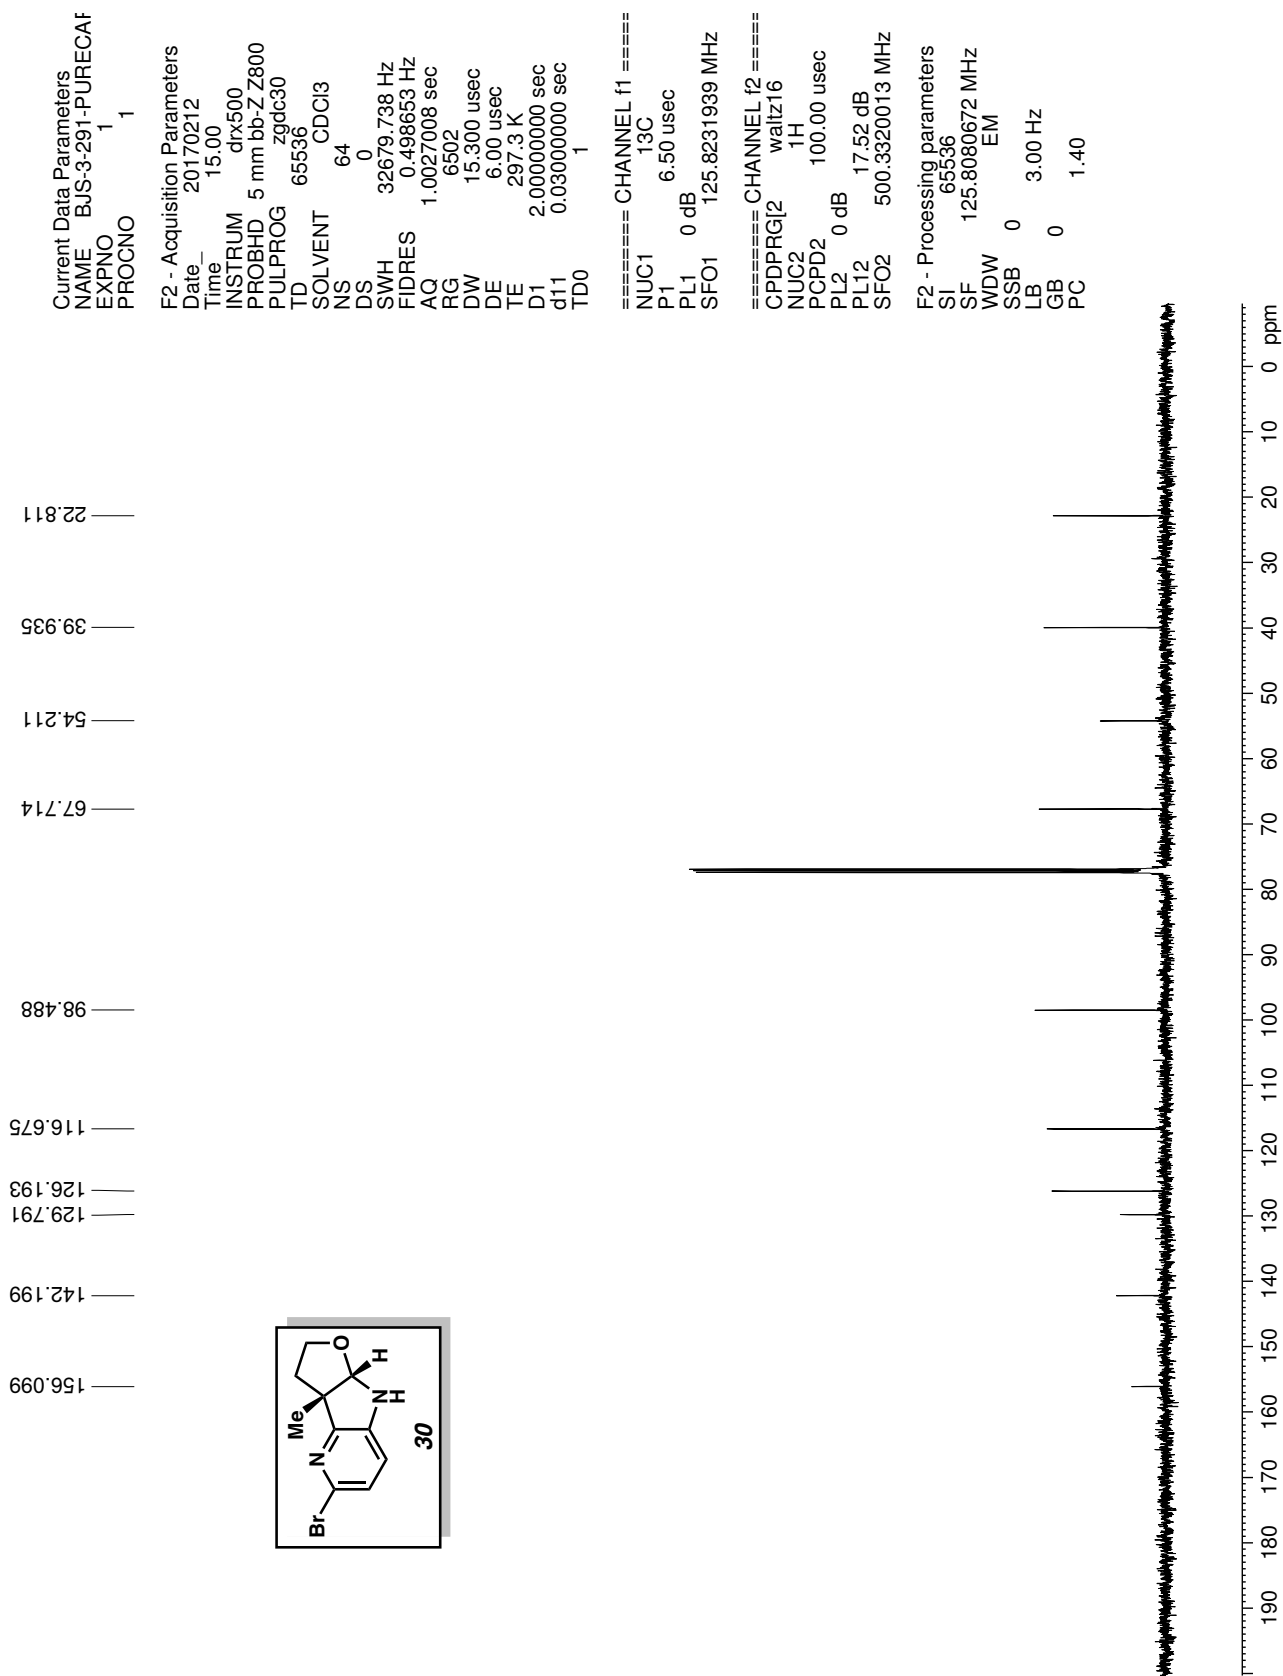

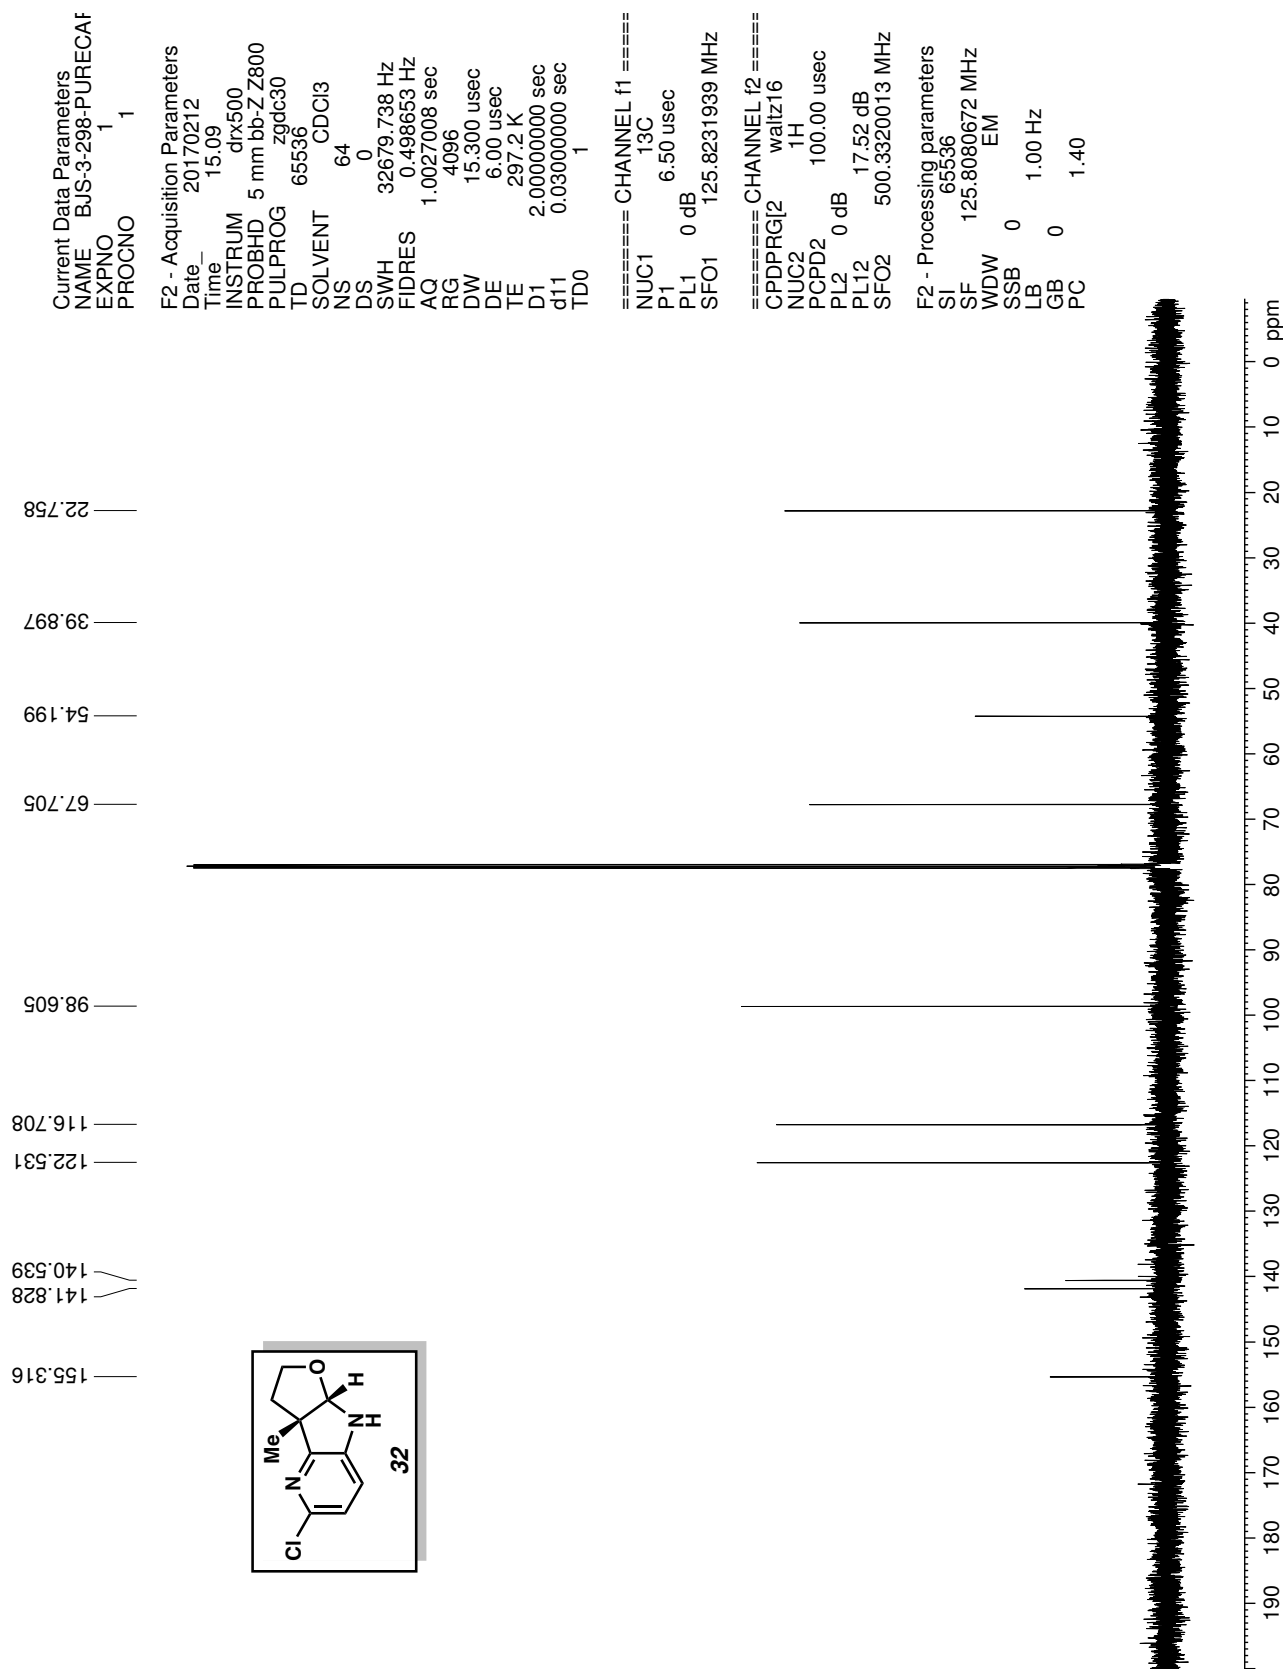

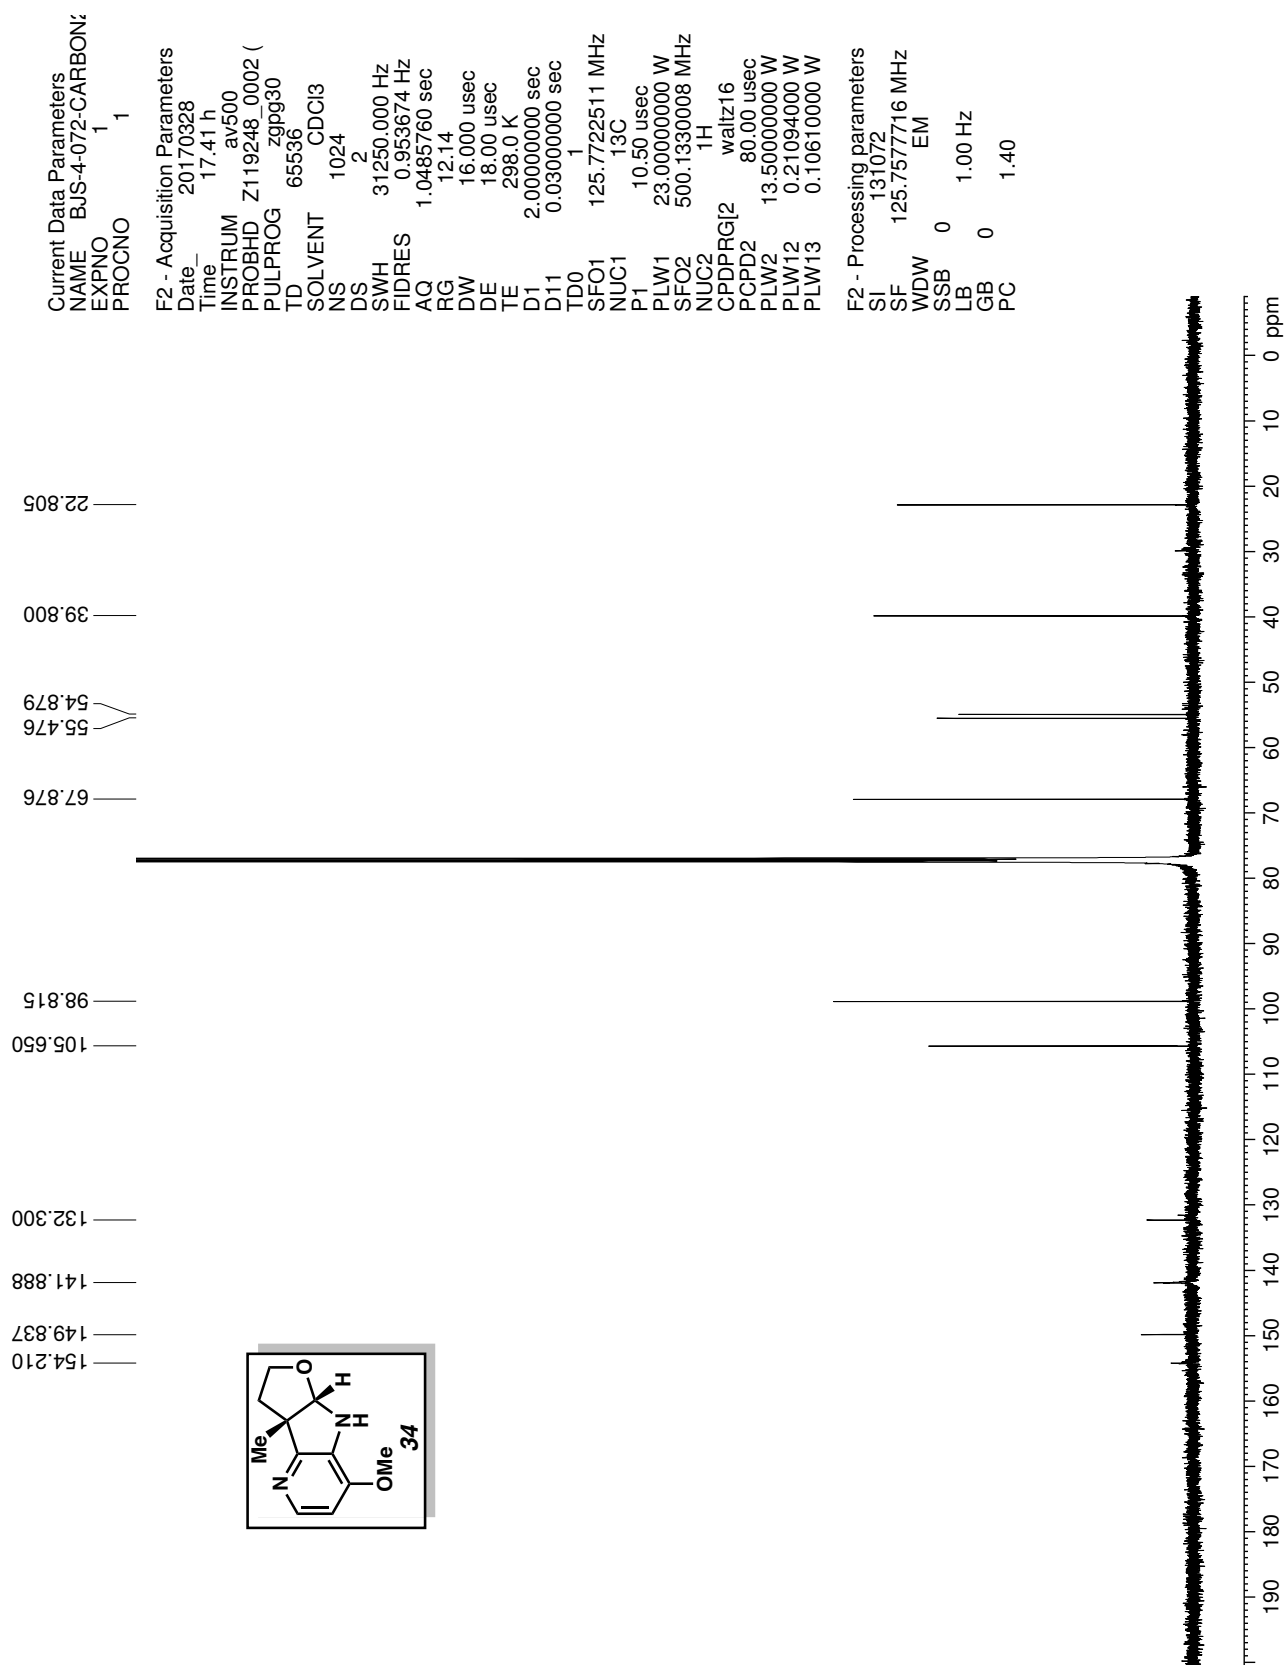

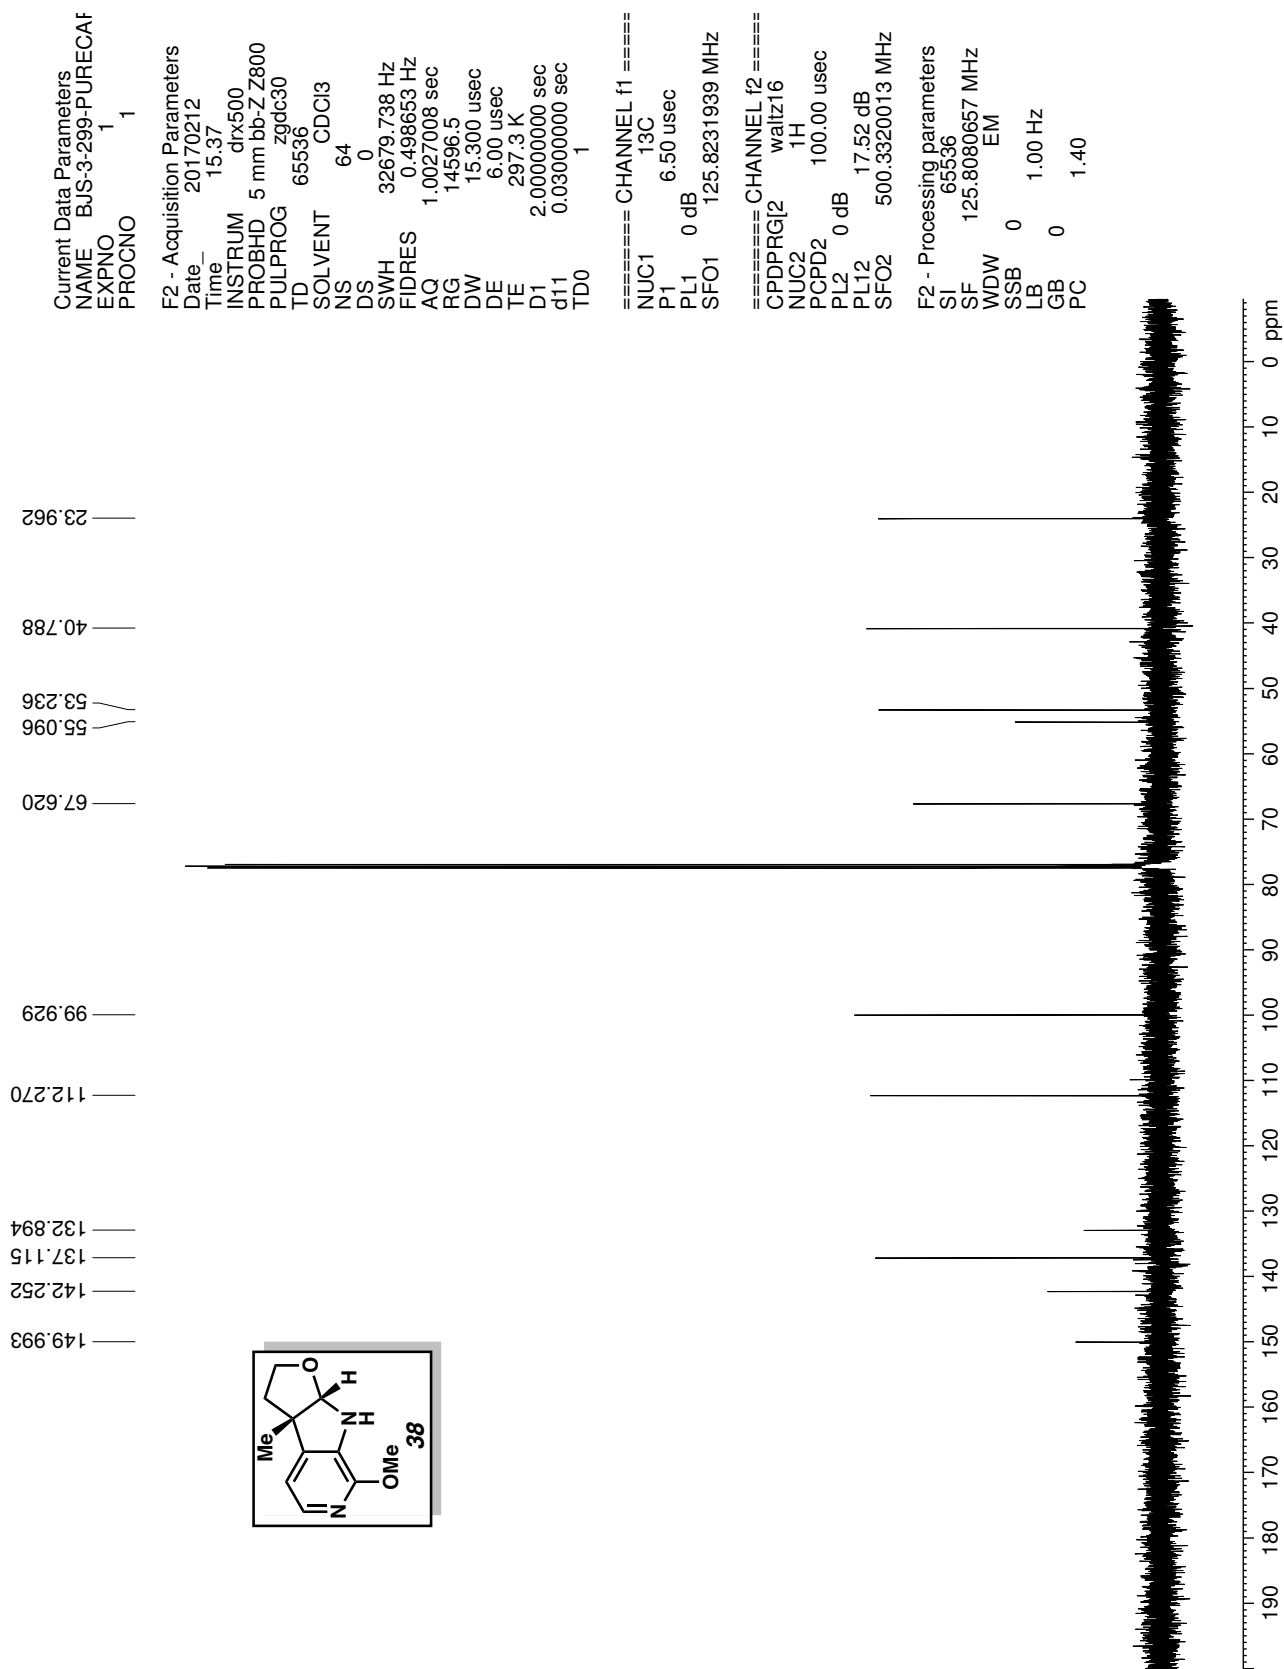

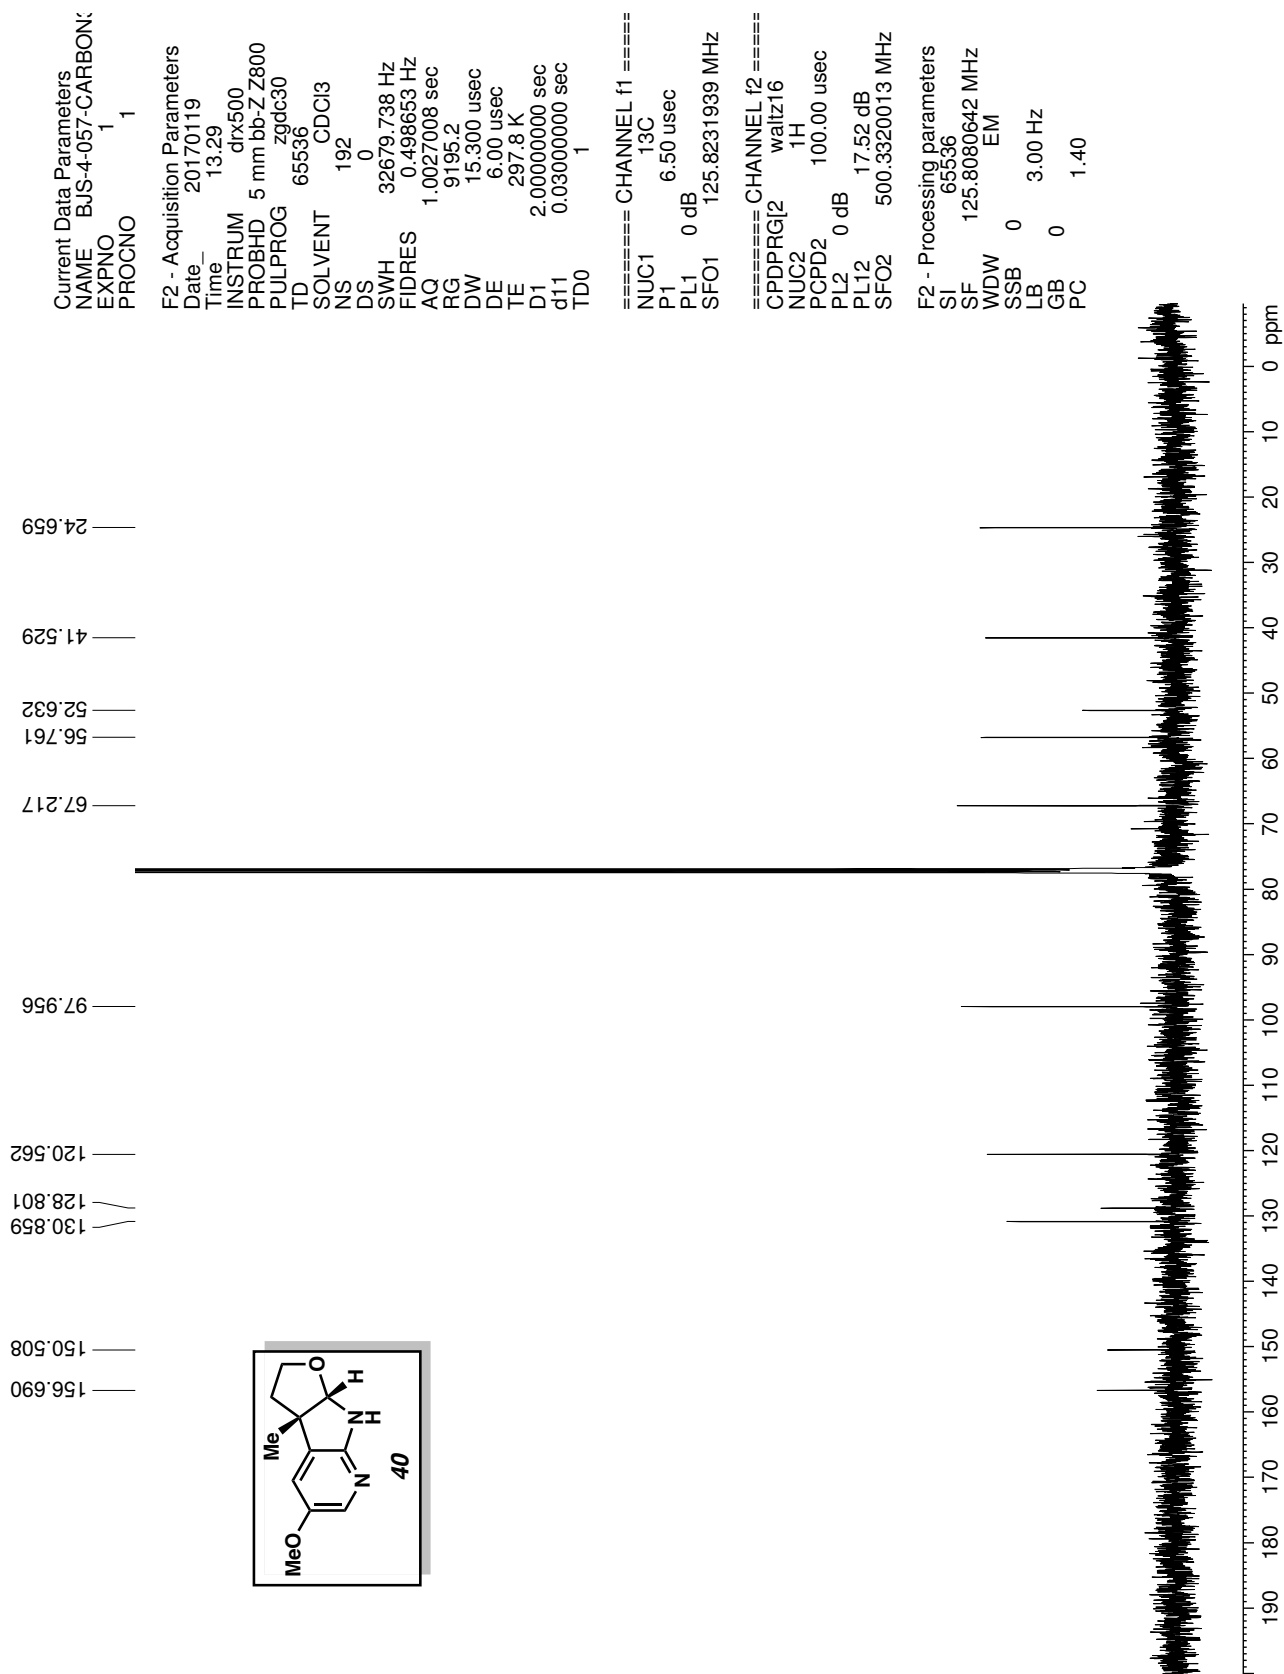

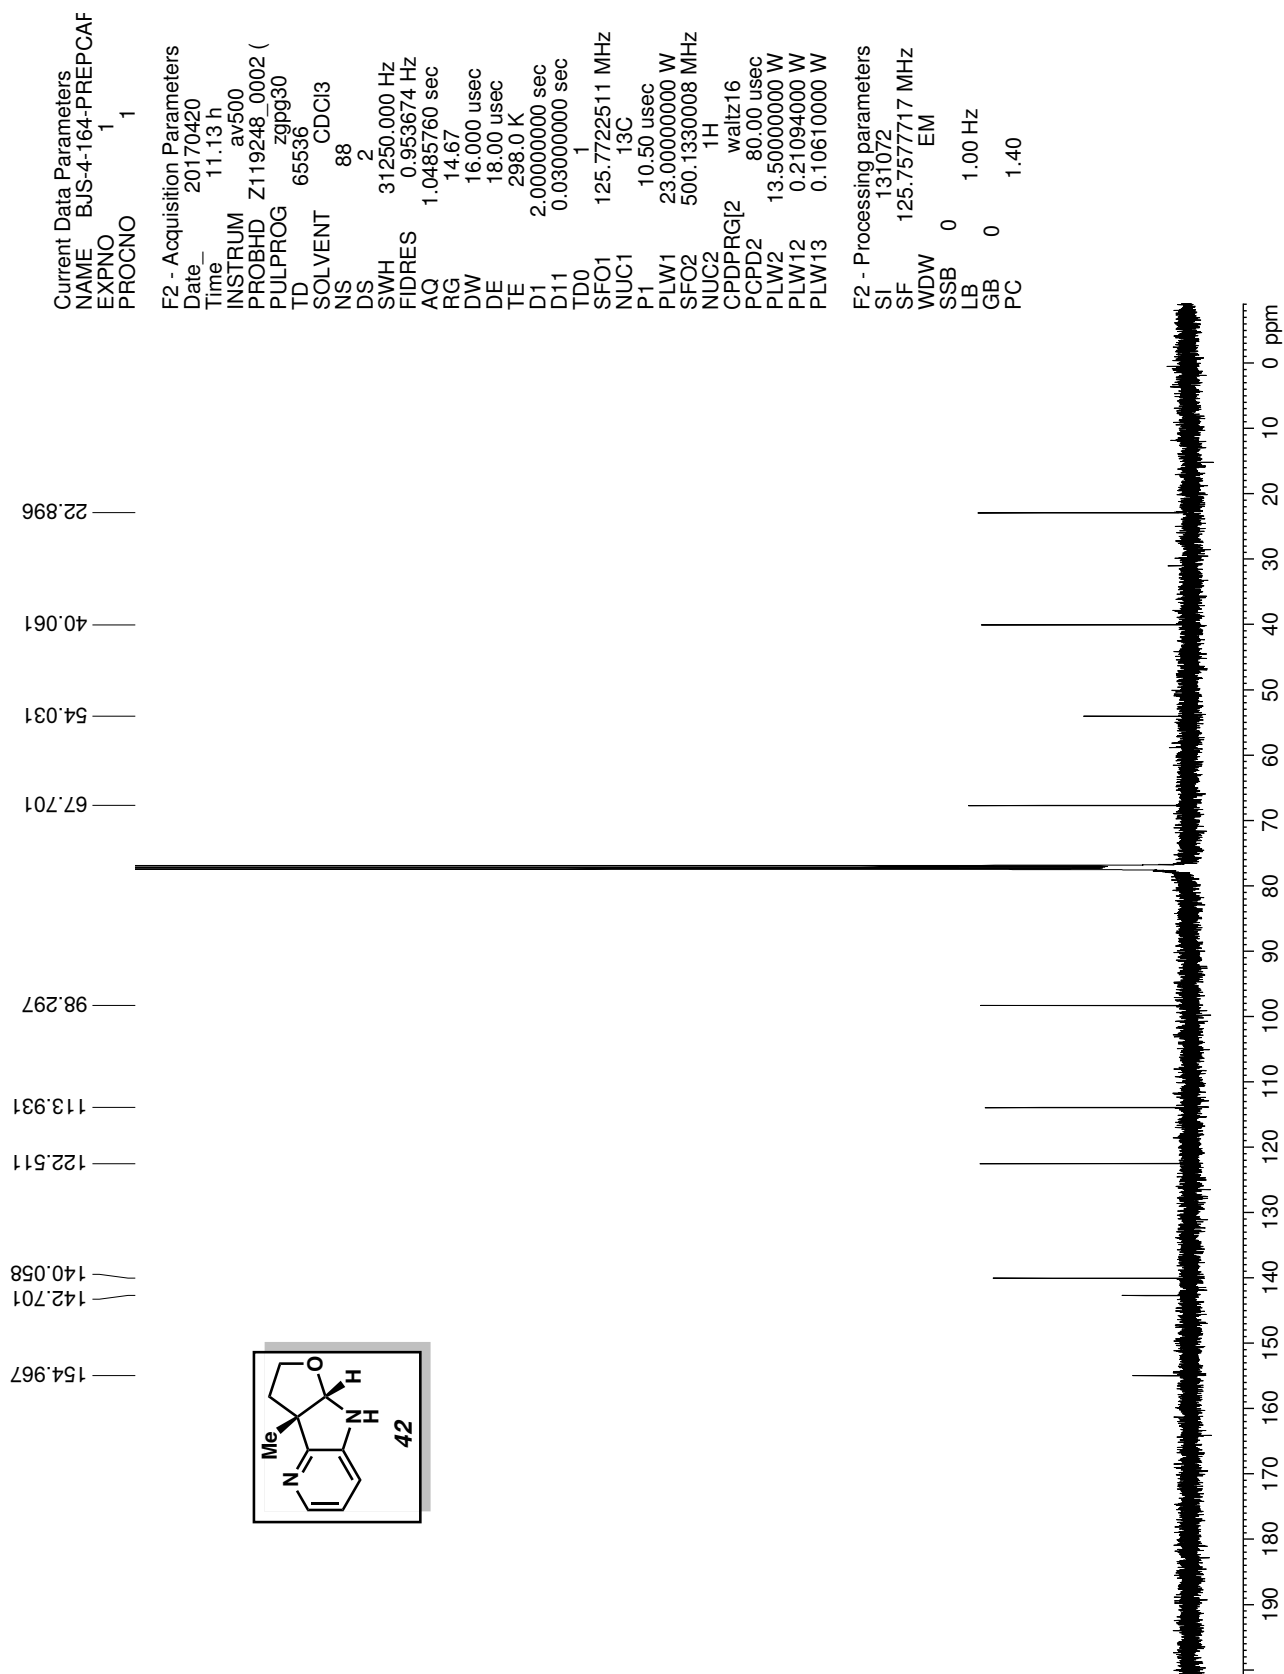



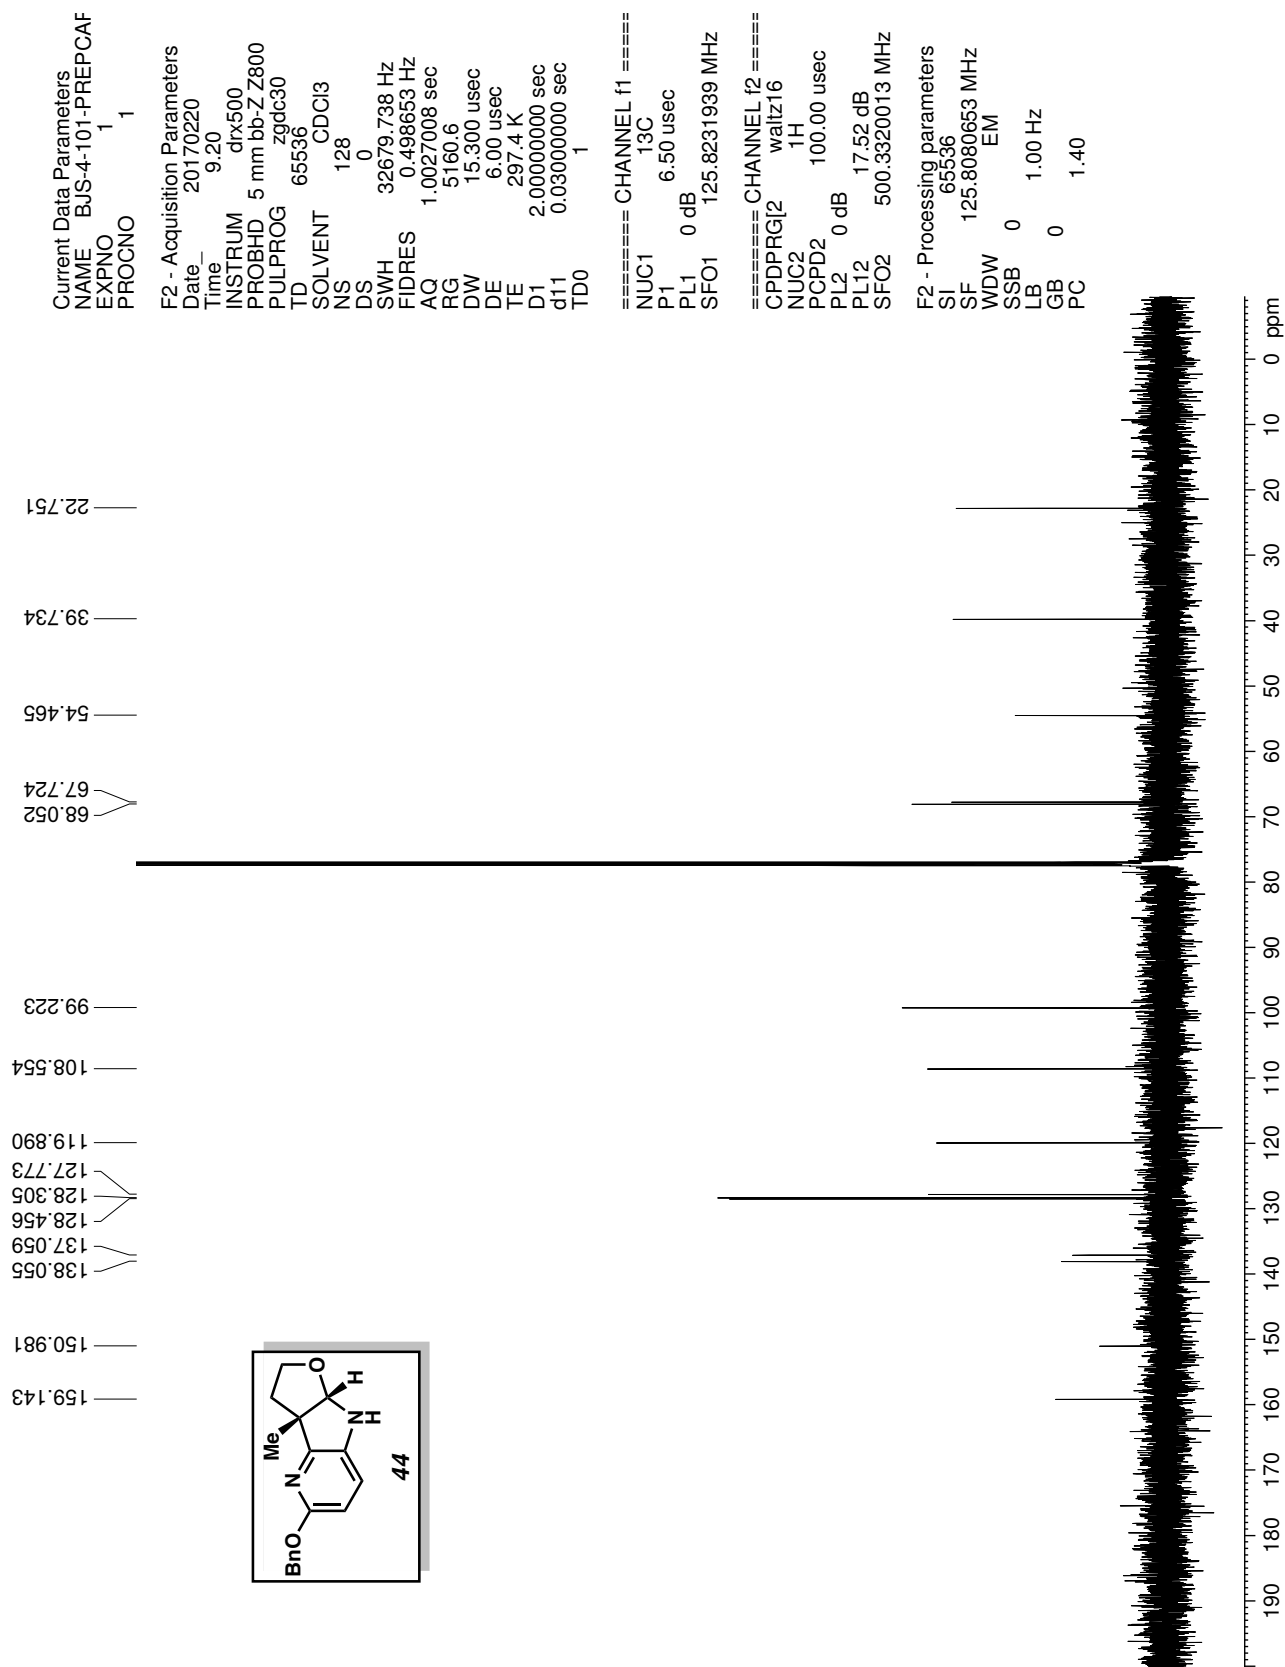

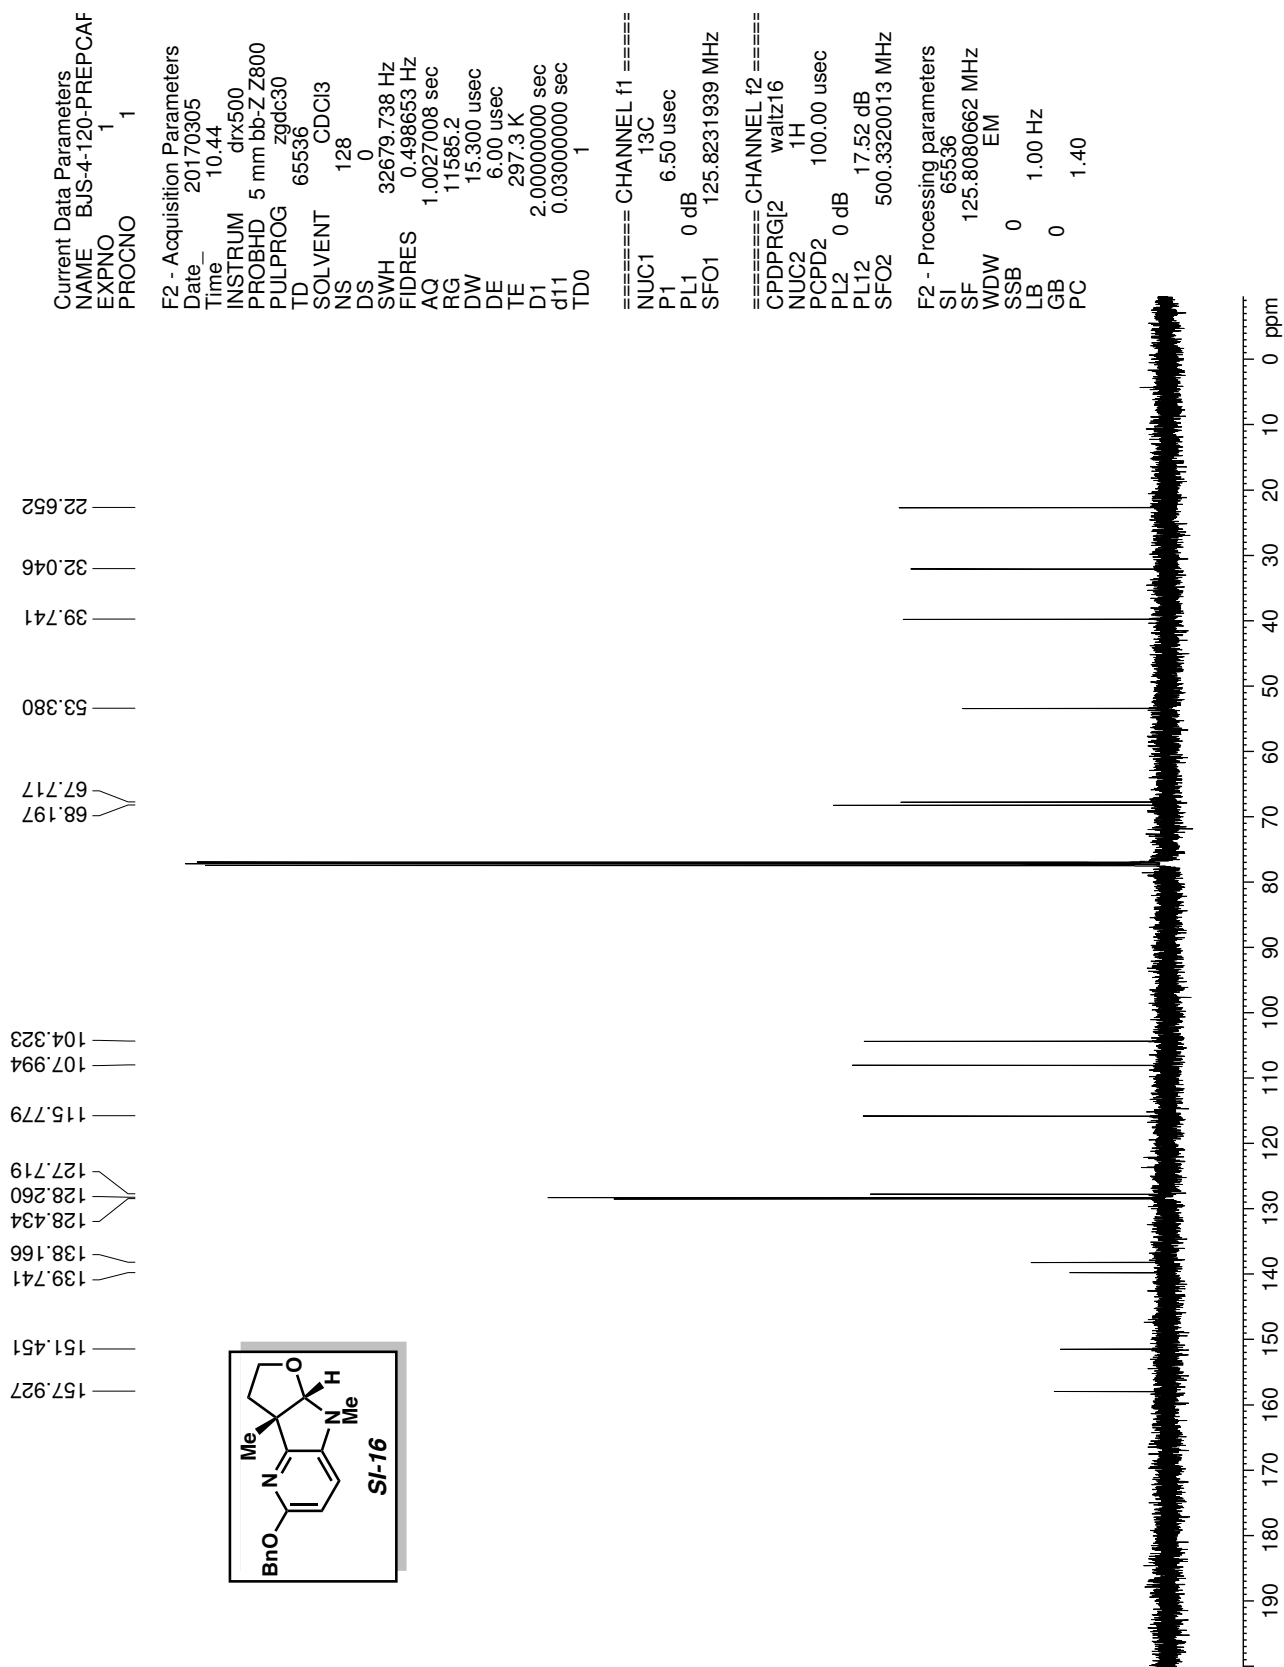

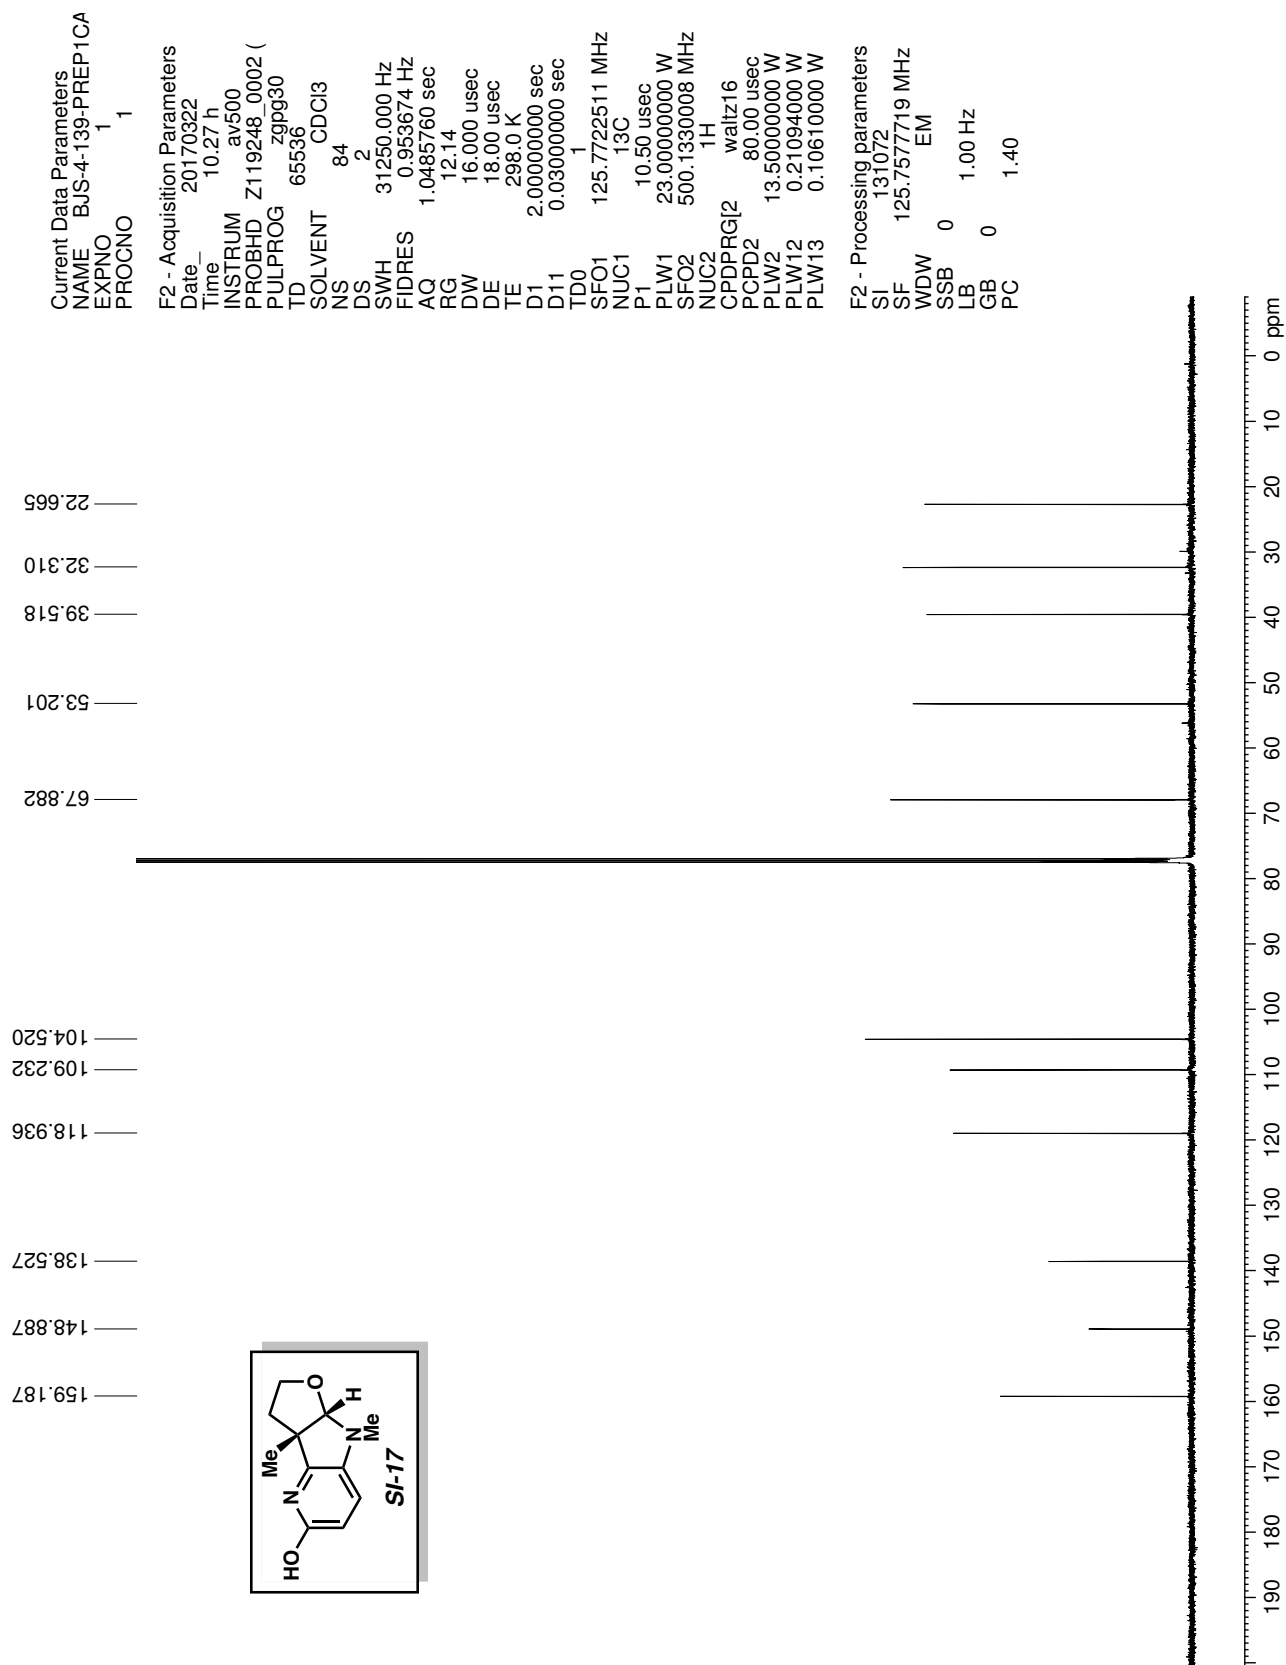

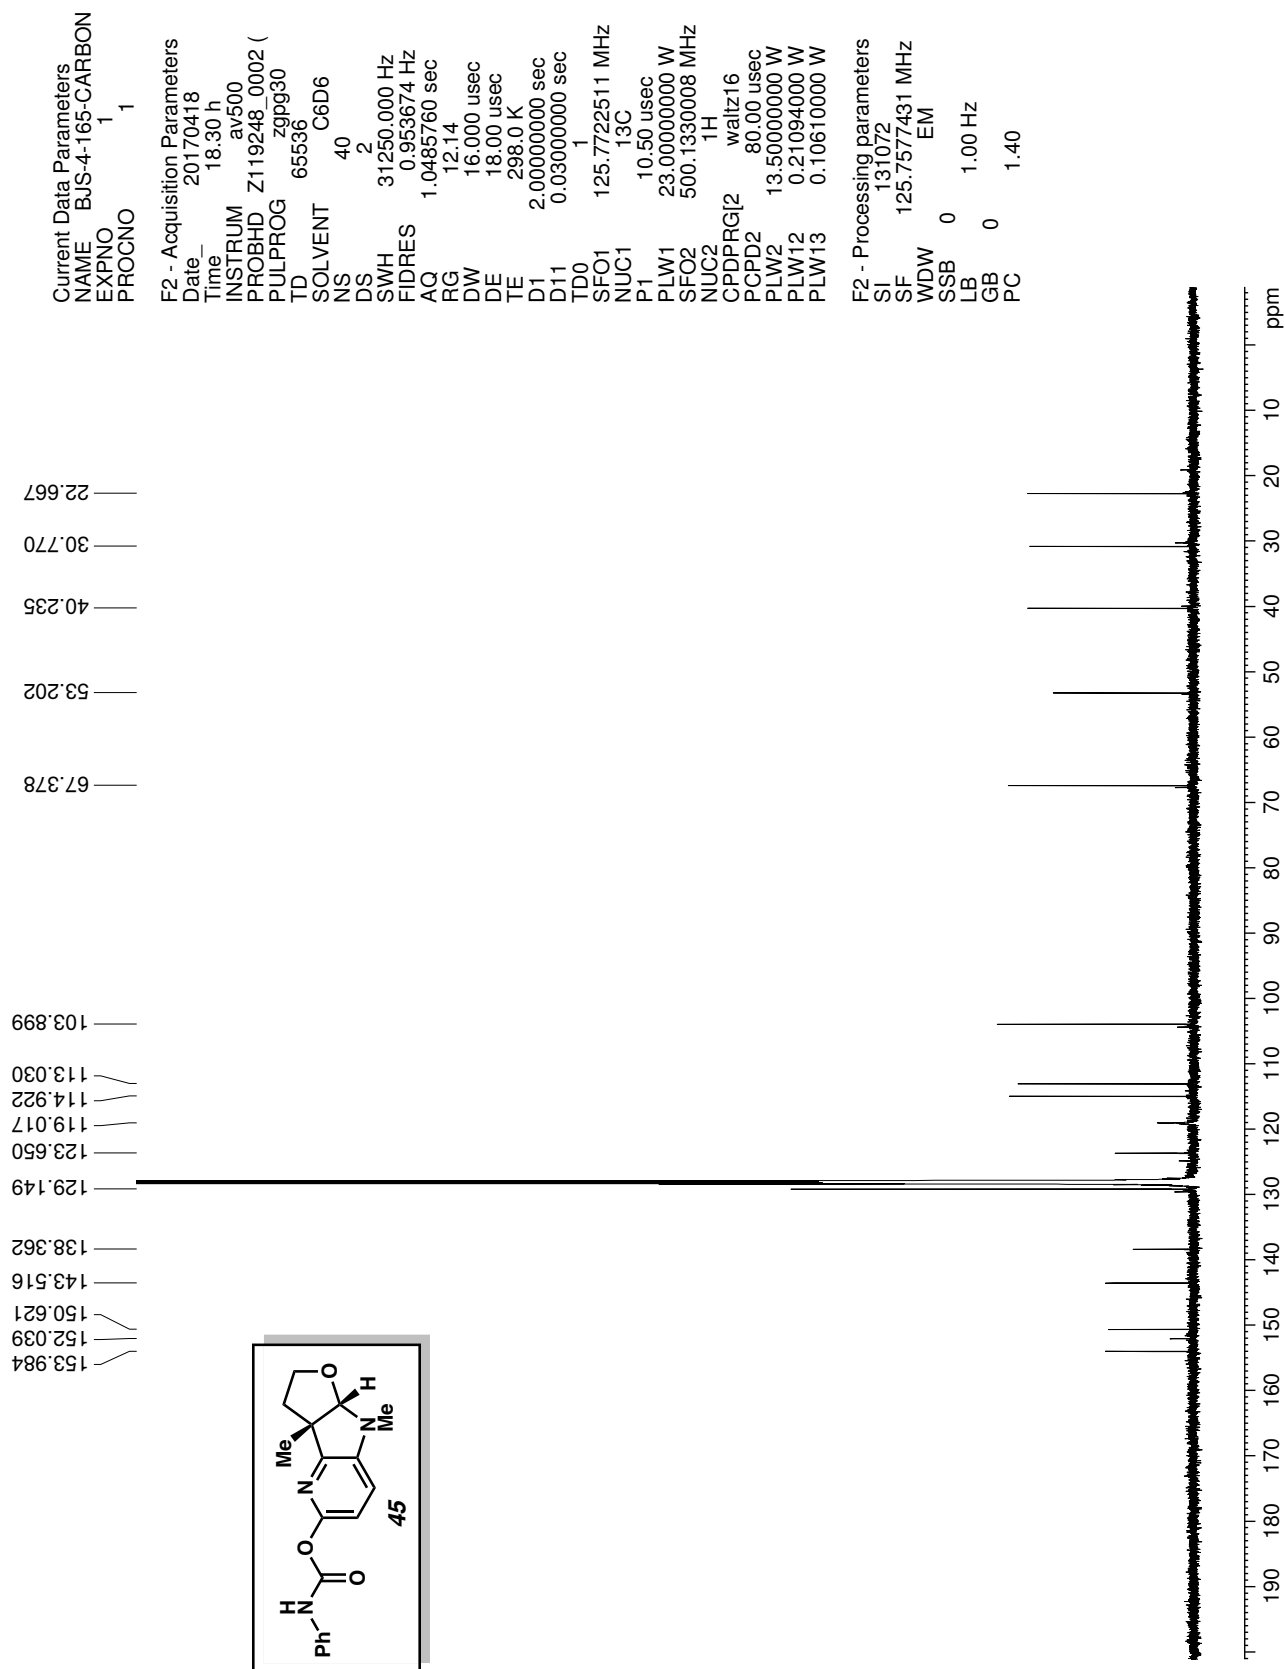

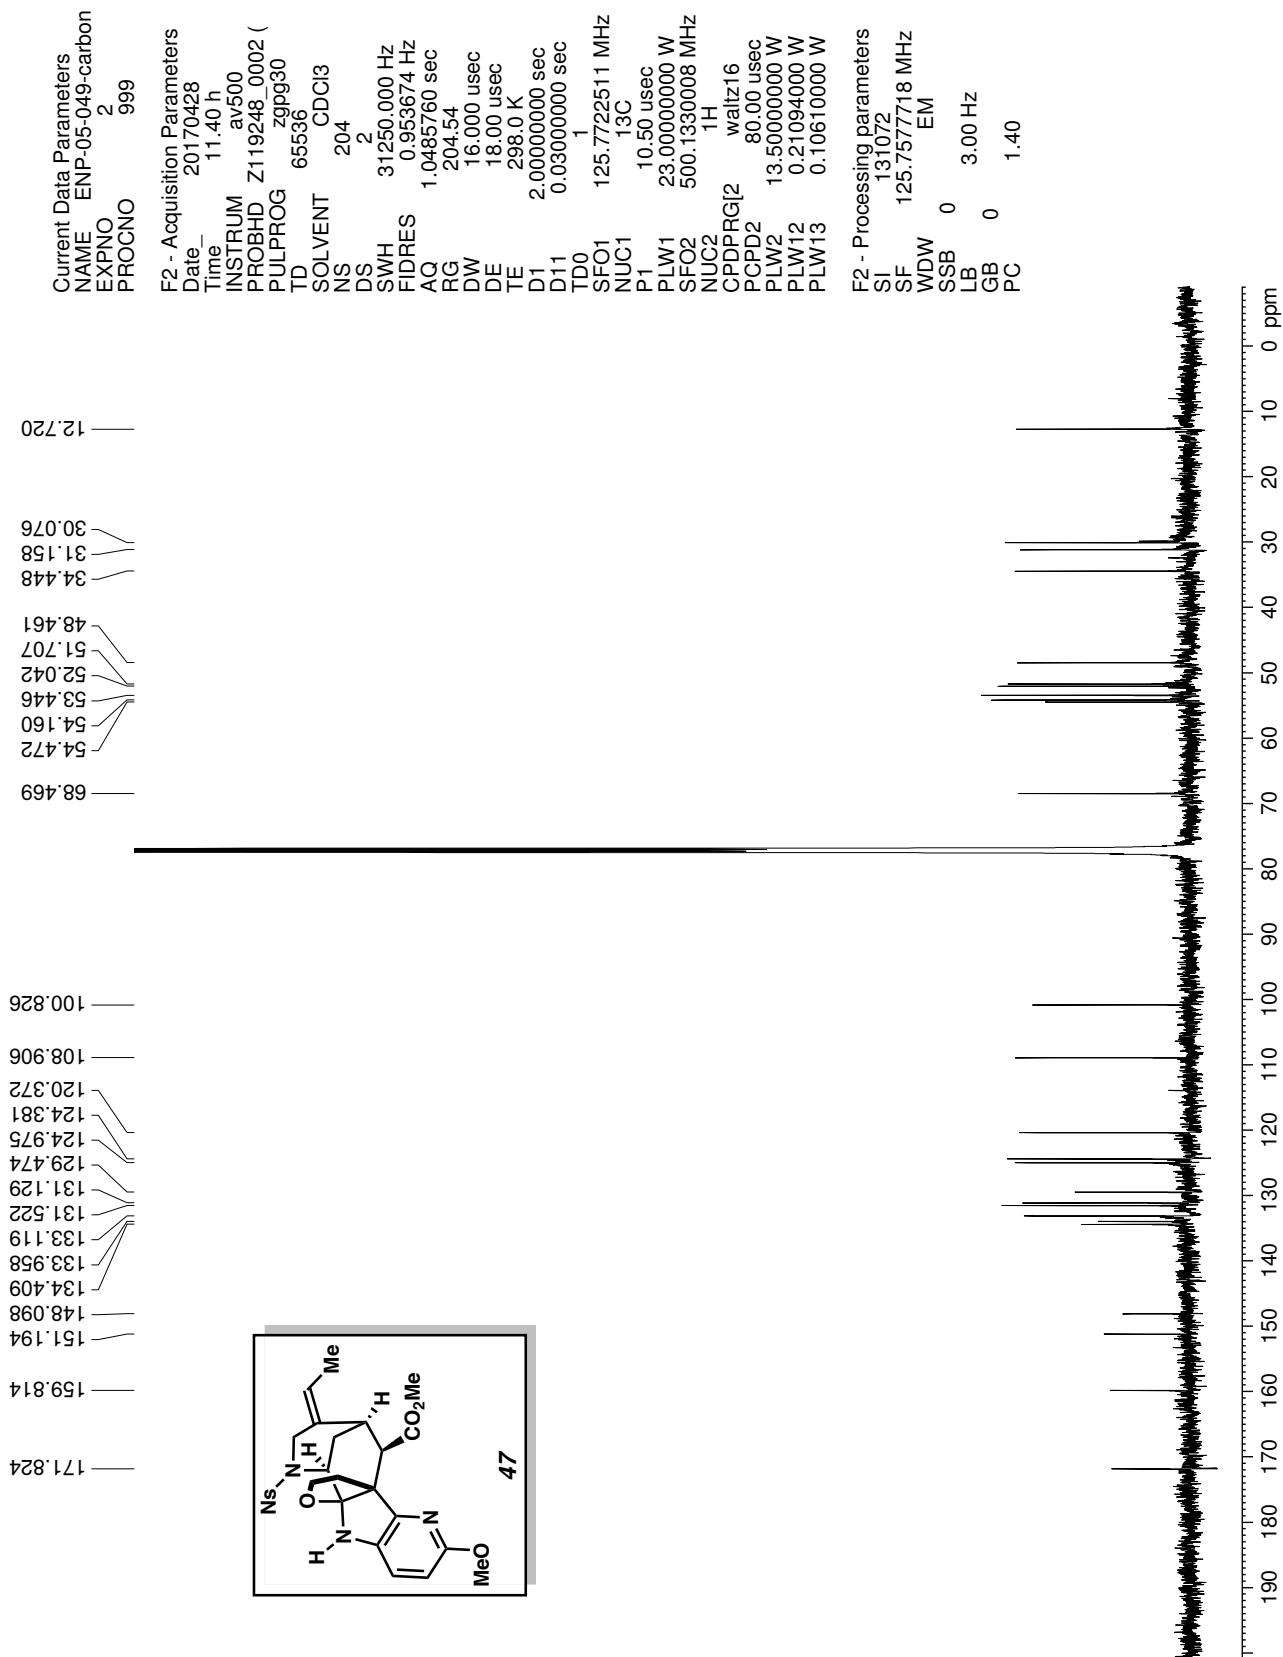

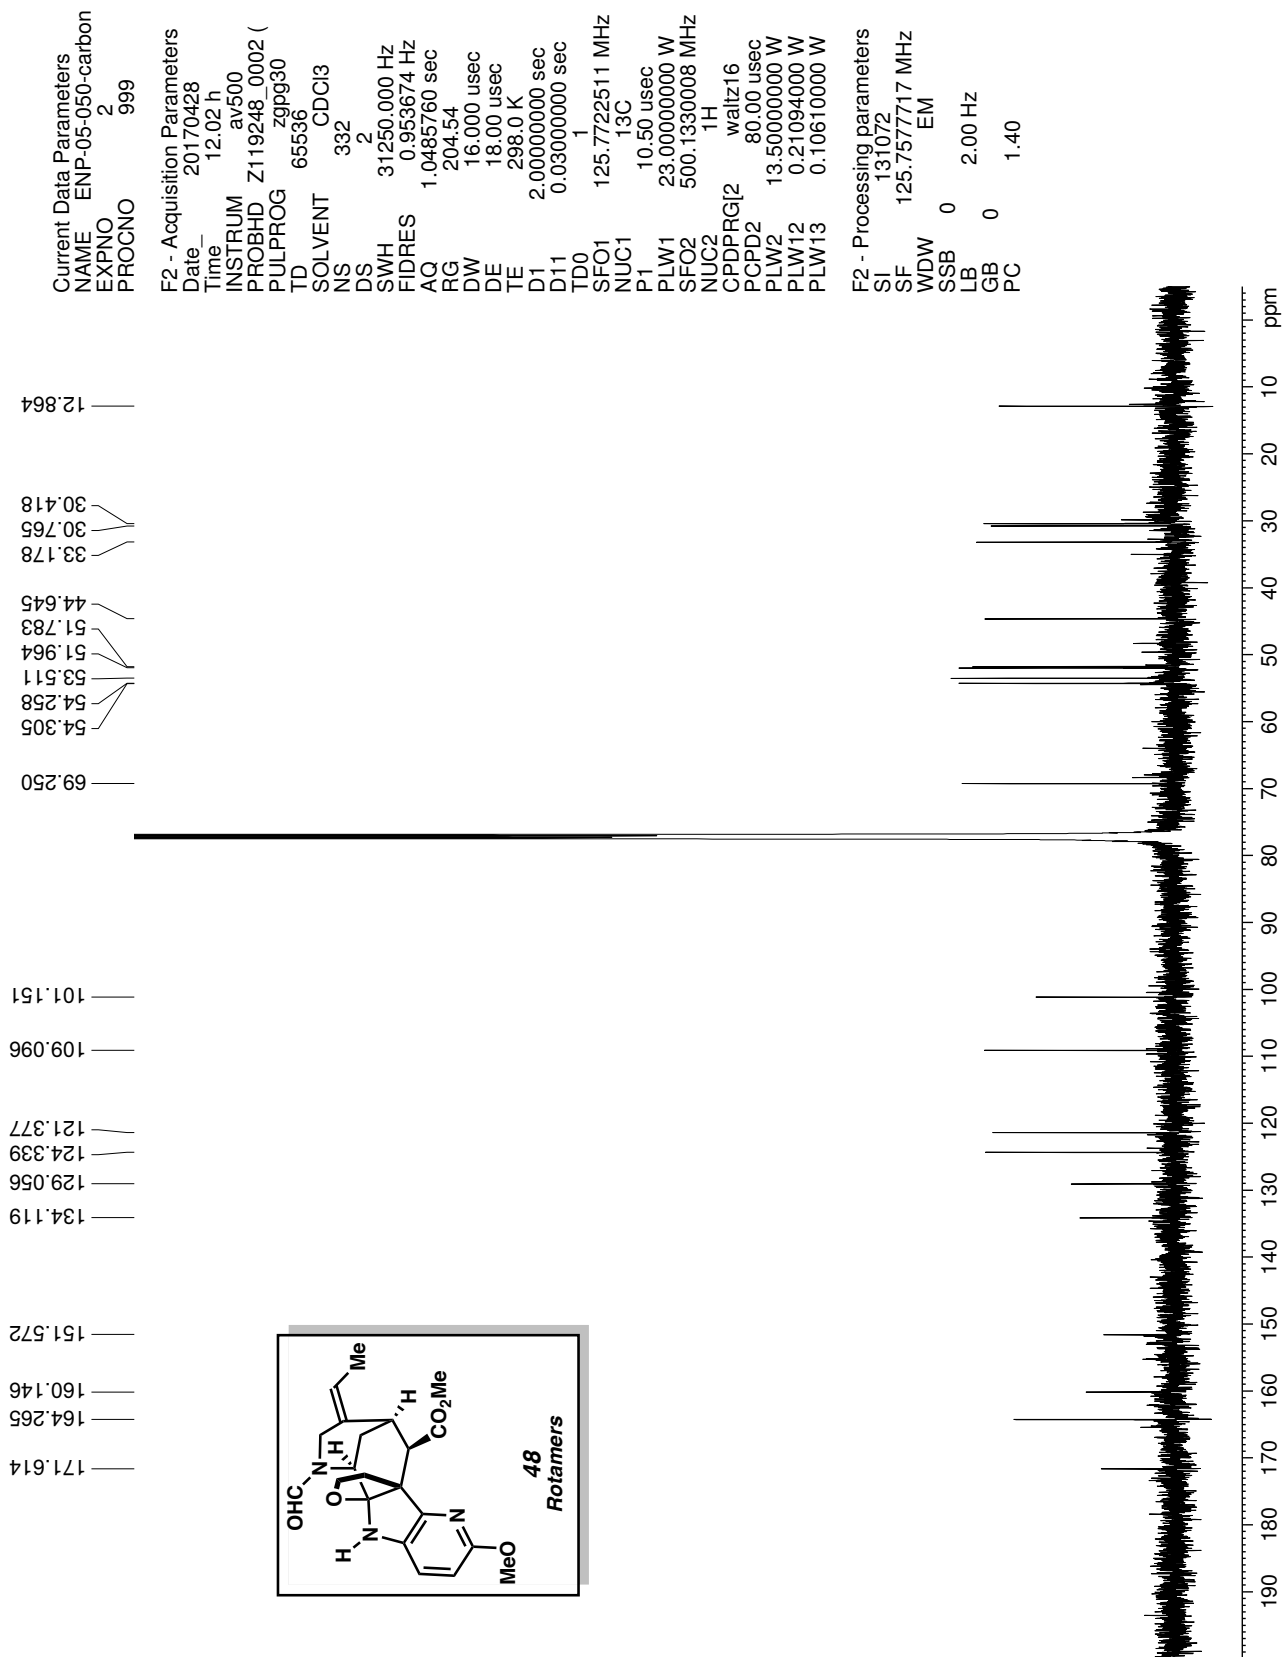

## Part II: Computational Section

### Full computational details

Ab initio calculations were performed with Gaussian 09.<sup>1</sup> Geometries were optimized and their vibrational frequencies obtained at the MP2/6-31G(d) level of theory, with the SMD solvation model for water.<sup>2</sup> MP2 energies were corrected using the “spin-component-scaled” (SCS) approach, pioneered by Grimme,<sup>3</sup> such as

$$E(\text{SCS-MP2}) = E(\text{SCF}) + 1.2 * (\alpha\beta) + (1/3) * (\alpha\alpha + \beta\beta)$$

where  $\alpha\alpha$ ,  $\beta\beta$ , and  $\alpha\beta$  are the “alpha-alpha”, “beta-beta” and “alpha-beta” spin contributions, respectively, found in the Gaussian output. In the case of closed-shell calculations such as those used in the current study,  $\alpha\alpha$  and  $\beta\beta$  are identical. This SCS-MP2 correction was found to greatly improve the performance of MP2 calculations, notably for sigmatropic rearrangements.<sup>4</sup> This SCS-MP2/6-31G(d)/SMD(water)//MP2/6-31G(d)/SMD(water) method was also chosen as we have previously shown that it accurately reproduces experimental rates of Fischer indolization reactions.<sup>5</sup> Normal mode frequency analysis was used to confirm that stationary points were either minima (no imaginary frequency) or saddle-points (TS, one (1) imaginary frequency) on the potential energy surface. All saddle-points were further analyzed with the Intrinsic Reaction Coordinate (IRC) tools to verify that they connected the expected minima. ZPE, enthalpy and free energy corrections were obtained using a standard state of 1 atmosphere of pressure and 298 K. Free energies were computed using Truhlar’s quasiharmonic oscillator approximation, setting all frequencies below 100 cm<sup>-1</sup> to 100 cm<sup>-1</sup>.<sup>6</sup> The free energies reported in this study are thus obtained by adding the quasiharmonic free energy corrections to the SCS-MP2 electronic energies. Reported structures are the result of extensive conformation sampling on all evaluated compounds. Structures were illustrated using CYLview.<sup>7</sup> To obtain atomic charges, natural bond orbital (NBO) analysis (pop=nbo keyword in Gaussian 09) was performed at the MP2/6-311+G(d,p) level (gas phase) on the MP2/6-31G(d)/SMD(water)-optimized structures.

## Additional figures and discussion

To study the effects of protonation and substituents on the barriers of the [3,3] sigmatropic rearrangement typical of Fischer indolization reactions, we chose a model system based on the combination of aryl/pyridyl hydrazines with propanal **S-2**. We have previously shown that in the case of aryl hydrazines, the [3,3]-rearrangement is the rate-limiting step of the reaction and occurs with the substrates being monoprotonated.<sup>5</sup>

**Scheme S-1:** Thermal (unprotonated) Fischer indolization reaction of our model system.

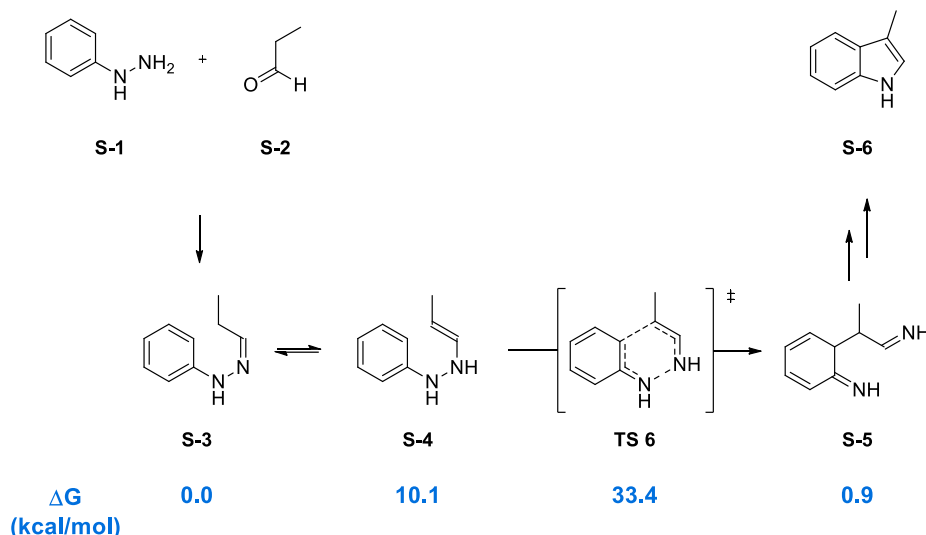

In the thermal Fischer indolization reaction (**Scheme S-1**), hydrazone **S-3** (formed from the condensation of aryl hydrazine **S-1** with propanal **S-2**) first tautomerizes to ene-hydrazone **S-4**, which can then undergo a [3,3]-sigmatropic rearrangement to form diimine **S-5**. This intermediate then rearomatizes and goes on to form the indole product **S-6**. When all compounds are neutral, reaching **TS 6** from the hydrazone costs 33.4 kcal/mol. This barrier is much higher than what is known experimentally for such reactions.<sup>5</sup>

In the acid-catalyzed (monoprotonated) reaction (**Scheme S-2**), two pathways are available to the substrates. The hydrazone with its  $\alpha$  nitrogen protonated (**S-7**) is the global minimum of the system, but **TS 7** has the smallest barrier for the rearrangement. In this case, the activation free energy of the reaction is then 23.8 kcal/mol, which is in agreement with experimental rates.<sup>5</sup>



**Scheme S-2:** Acid-catalyzed (monoprotonated) Fischer indolization reaction of our model system.

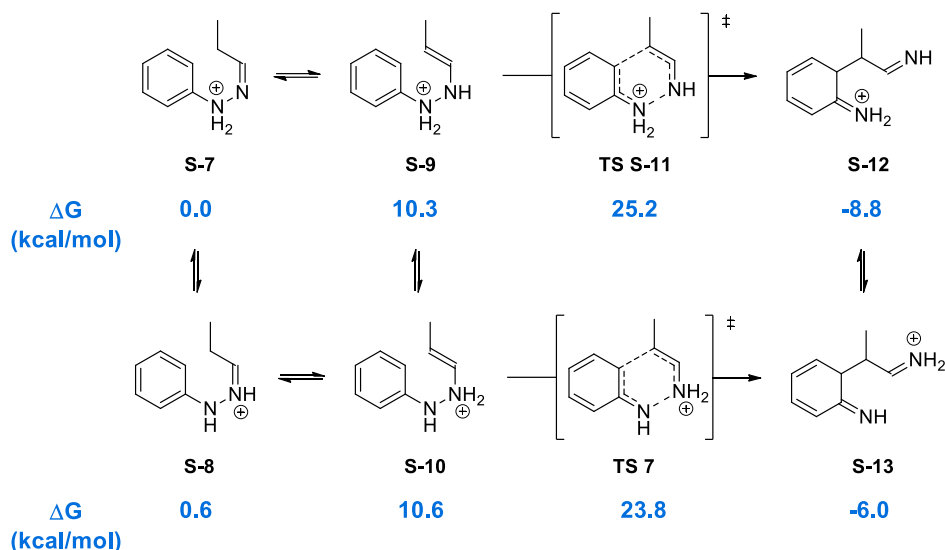

Therefore, all other systems that we studied were singly protonated. For all pyridyl hydrazines, three different nitrogen atoms can be protonated on any intermediate or transition state. Moreover, in most cases the [3,3]-rearrangement can occur on two different carbons, meaning two transition states and two diimine products are possible for each protonation state. The full pathway for the parent pyridyl hydrazine is presented below in **Scheme S-3**.

Relative free energies for all other computed systems can be found in **Table S-1**. In all cases the global minimum is the hydrazone protonated at the pyridine nitrogen. Moreover, in all but one case, the most favored transition state goes through protonation at the  $\beta$ -nitrogen of the hydrazone.

The free energy for the pathway of  $\alpha$ -methylpyridine hydrazone is found in **Scheme S-4**. Once again, the hydrazone protonated at the pyridine nitrogen is the global minimum of the system, and because of the increased basicity of the methyl-substituted ene-hydrazine  $\alpha$  nitrogen, the best transition state goes through with protonation of the  $\alpha$ -nitrogen.

**Scheme S-3:** Full pathway for the reaction of protonated 3-pyridylhydrazine. Free energies in kcal/mol.

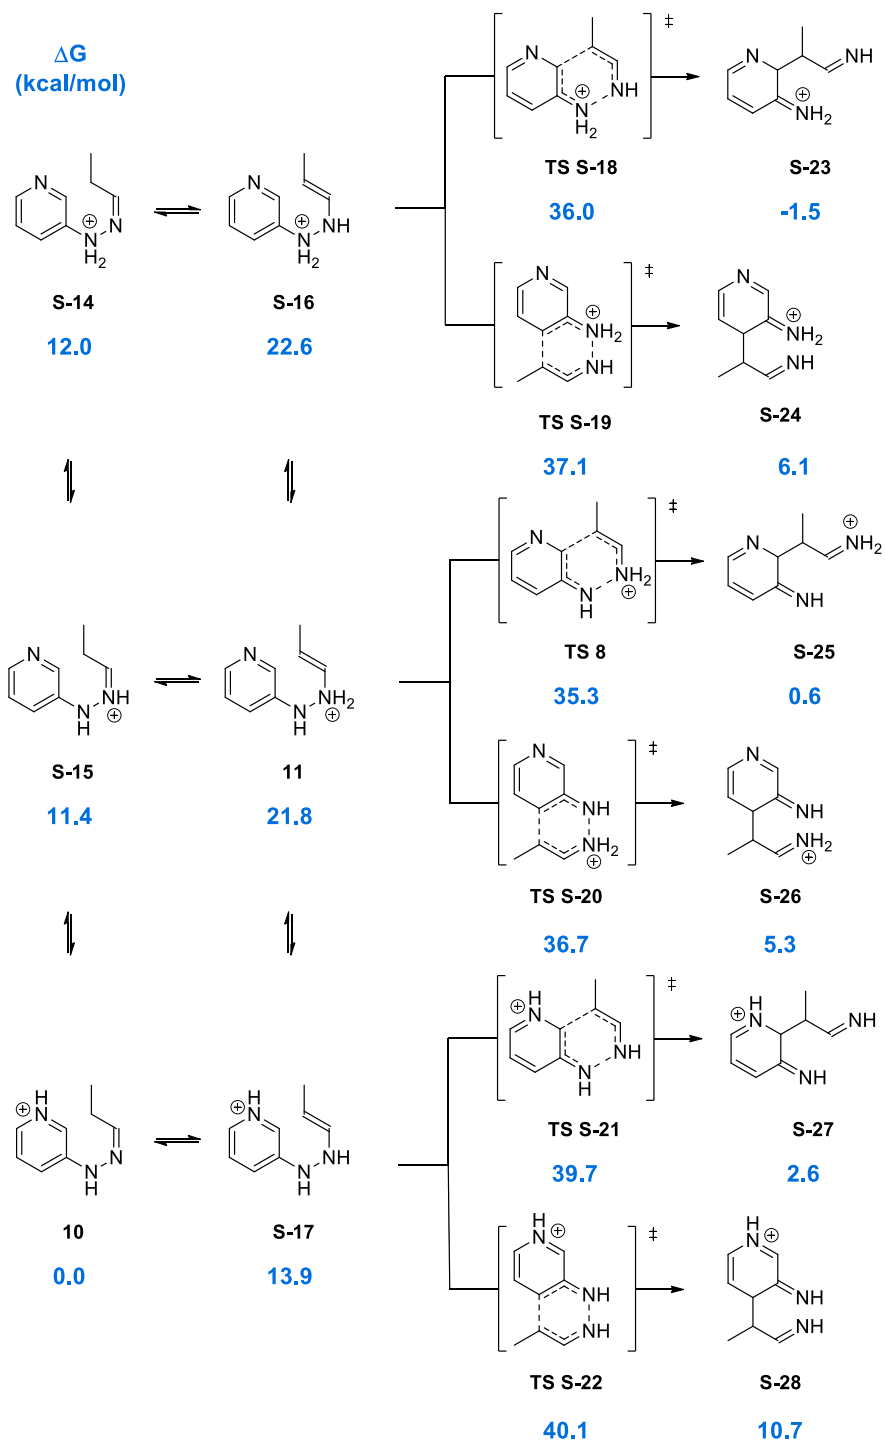

**Scheme S-4:** Productive pathway for the reaction of methyl-substituted protonated 3-pyridylhydrazine. Free energies in kcal/mol.

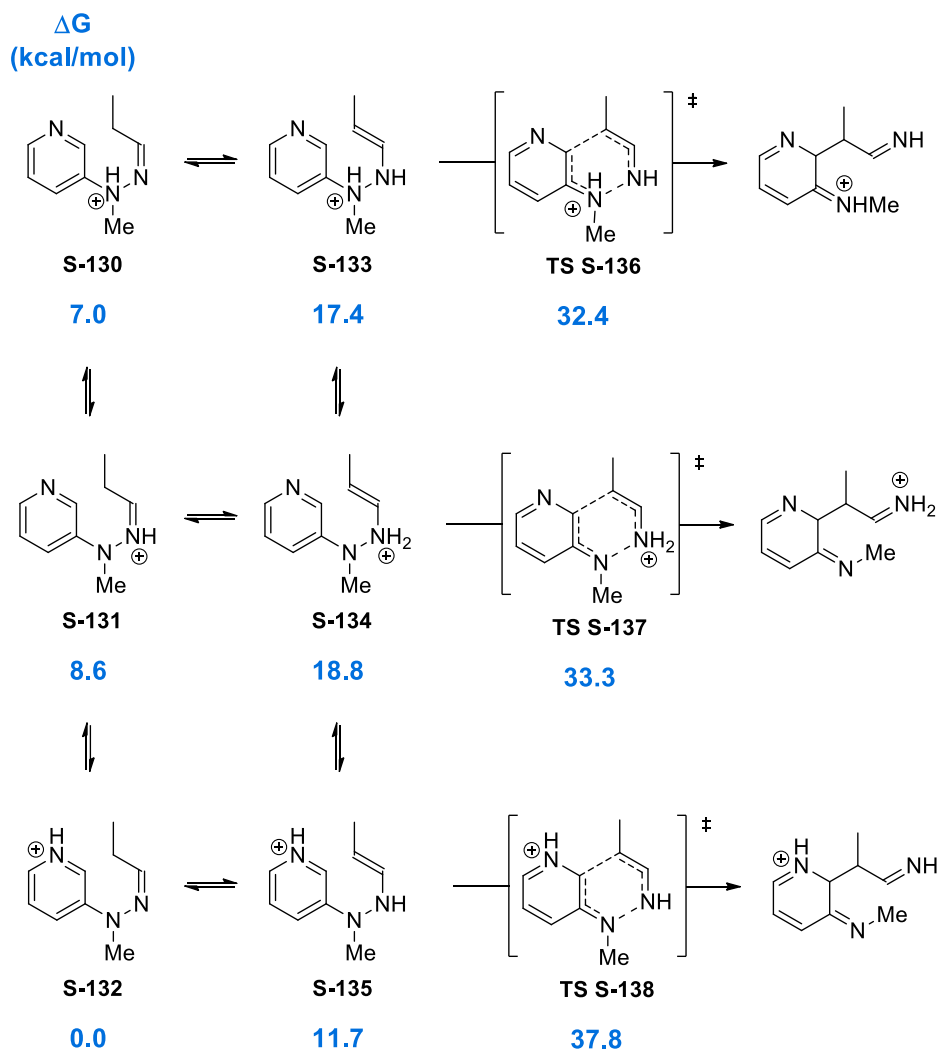

**Table S-1:** Compound numbers and relative free energies (kcal/mol) for each possible intermediate or transition state on the potential energy pathways of different monoprotonated pyridyl hydrazones formed by pyridyl hydrazines and propanal.

|                                                                                     | 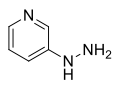<br>41 | <br>12 | <br>31 | <br>29 | <br>33 | <br>37 | <br>35 | <br>39 |             |            |              |            |              |            |              |            |
|-------------------------------------------------------------------------------------|-----------------------------------------------------------------------------------------|-----------------------------------------------------------------------------------------|-----------------------------------------------------------------------------------------|------------------------------------------------------------------------------------------|-------------------------------------------------------------------------------------------|-------------------------------------------------------------------------------------------|-------------------------------------------------------------------------------------------|-------------------------------------------------------------------------------------------|-------------|------------|--------------|------------|--------------|------------|--------------|------------|
|                                                                                     | cmpd #                                                                                  | $\Delta G$                                                                              | cmpd #                                                                                  | $\Delta G$                                                                               | cmpd #                                                                                    | $\Delta G$                                                                                | cmpd #                                                                                    | $\Delta G$                                                                                | cmpd #      | $\Delta G$ | cmpd #       | $\Delta G$ | cmpd #       | $\Delta G$ | cmpd #       | $\Delta G$ |
|    | <b>S-14</b>                                                                             | 12.0                                                                                    | <b>S-29</b>                                                                             | 6.5                                                                                      | <b>S-46</b>                                                                               | 4.8                                                                                       | <b>S-64</b>                                                                               | 4.5                                                                                       | <b>S-82</b> | 13.0       | <b>S-94</b>  | 4.2        | <b>S-106</b> | 17.4       | <b>S-118</b> | 10.2       |
|    | <b>S-15</b>                                                                             | 11.4                                                                                    | <b>S-30</b>                                                                             | 5.7                                                                                      | <b>S-47</b>                                                                               | 2.9                                                                                       | <b>S-65</b>                                                                               | 2.1                                                                                       | <b>S-83</b> | 12.0       | <b>S-95</b>  | 3.4        | <b>S-107</b> | 15.4       | <b>S-119</b> | 8.6        |
|    | <b>10</b>                                                                               | 0.0                                                                                     | <b>S-31</b>                                                                             | 0.0                                                                                      | <b>S-48</b>                                                                               | 0.0                                                                                       | <b>S-66</b>                                                                               | 0.0                                                                                       | <b>S-84</b> | 0.0        | <b>S-96</b>  | 0.0        | <b>S-108</b> | 0.0        | <b>S-120</b> | 0.0        |
|    | <b>S-16</b>                                                                             | 22.6                                                                                    | <b>S-32</b>                                                                             | 16.5                                                                                     | <b>S-49</b>                                                                               | 15.4                                                                                      | <b>S-67</b>                                                                               | 14.8                                                                                      | <b>S-85</b> | 23.1       | <b>S-97</b>  | 15.8       | <b>S-109</b> | 28.2       | <b>S-121</b> | 21.8       |
|   | <b>11</b>                                                                               | 21.8                                                                                    | <b>S-33</b>                                                                             | 14.9                                                                                     | <b>S-50</b>                                                                               | 12.5                                                                                      | <b>S-68</b>                                                                               | 12.1                                                                                      | <b>S-86</b> | 20.1       | <b>S-98</b>  | 11.5       | <b>S-110</b> | 23.7       | <b>S-122</b> | 18.8       |
|  | <b>S-17</b>                                                                             | 13.9                                                                                    | <b>S-34</b>                                                                             | 13.9                                                                                     | <b>S-51</b>                                                                               | 14.3                                                                                      | <b>S-69</b>                                                                               | 14.2                                                                                      | <b>S-87</b> | 14.6       | <b>S-99</b>  | 12.8       | <b>S-111</b> | 15.3       | <b>S-123</b> | 13.3       |
|  | <b>S-18</b>                                                                             | 36.0                                                                                    | <b>S-35</b>                                                                             | 27.8                                                                                     | <b>S-52</b>                                                                               | 28.6                                                                                      | <b>S-70</b>                                                                               | 27.9                                                                                      | <b>S-88</b> | 35.5       | <b>S-100</b> | 25.6       | <b>S-112</b> | 42.0       | <b>S-124</b> | 35.2       |
|  | <b>S-19</b>                                                                             | 37.1                                                                                    | <b>S-36</b>                                                                             | 32.4                                                                                     | <b>S-53</b>                                                                               | 30.5                                                                                      | <b>S-71</b>                                                                               | 29.7                                                                                      | –           | –          | –            | –          | –            | –          | –            | –          |

|                                                                                     |             |             |             |             |             |             |             |             |             |             |              |      |              |             |              |             |
|-------------------------------------------------------------------------------------|-------------|-------------|-------------|-------------|-------------|-------------|-------------|-------------|-------------|-------------|--------------|------|--------------|-------------|--------------|-------------|
| 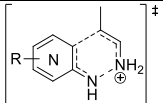   | <b>8</b>    | <b>35.3</b> | <b>9</b>    | <b>26.3</b> | <b>S-54</b> | <b>27.6</b> | <b>S-72</b> | <b>26.8</b> | <b>S-89</b> | <b>34.5</b> | <b>S-101</b> | 25.8 | <b>S-113</b> | <b>40.3</b> | <b>S-125</b> | <b>32.2</b> |
|    | <b>S-20</b> | 36.7        | <b>S-37</b> | 31.2        | <b>S-55</b> | 29.1        | <b>S-73</b> | 28.4        | –           | –           | –            | –    | –            | –           | –            | –           |
|    | <b>S-21</b> | 39.7        | <b>S-38</b> | 35.9        | <b>S-56</b> | 39.6        | <b>S-74</b> | 40.0        | <b>S-90</b> | 37.7        | <b>S-102</b> | 35.3 | <b>S-114</b> | 45.0        | <b>S-126</b> | 41.7        |
|    | <b>S-22</b> | 40.1        | <b>S-39</b> | 40.0        | <b>S-57</b> | 40.5        | <b>S-75</b> | 40.5        | –           | –           | –            | –    | –            | –           | –            | –           |
|    | <b>S-23</b> | -1.5        | <b>S-40</b> | -10.2       | <b>S-58</b> | -8.8        | <b>S-76</b> | -9.3        | <b>S-91</b> | -0.1        | <b>S-103</b> | -4.3 | <b>S-115</b> | 5.5         | <b>S-127</b> | 0.7         |
|    | <b>S-24</b> | 6.1         | <b>S-41</b> | 8.3         | <b>S-59</b> | 0.6         | <b>S-77</b> | -0.4        | –           | –           | –            | –    | –            | –           | –            | –           |
|    | <b>S-25</b> | 0.6         | <b>S-42</b> | -9.2        | <b>S-60</b> | -8.7        | <b>S-78</b> | -9.3        | <b>S-92</b> | 0.5         | <b>S-104</b> | -5.9 | <b>S-116</b> | 7.0         | <b>S-128</b> | 1.4         |
|   | <b>S-26</b> | 5.3         | <b>S-43</b> | 2.7         | <b>S-61</b> | -1.6        | <b>S-79</b> | -2.5        | –           | –           | –            | –    | –            | –           | –            | –           |
|  | <b>S-27</b> | 2.6         | <b>S-44</b> | -6.7        | <b>S-62</b> | 1.8         | <b>S-80</b> | 2.6         | <b>S-93</b> | 0.0         | <b>S-105</b> | 0.7  | <b>S-117</b> | 11.3        | <b>S-129</b> | 10.0        |
|  | <b>S-28</b> | 10.7        | <b>S-45</b> | -4.3        | <b>S-63</b> | -7.3        | <b>S-81</b> | -8.6        | –           | –           | –            | –    | –            | –           | –            | –           |

## Origin of regioselectivity

Fischer indolization reactions with aza-substituted substrates are regioselective. The calculations support these results. In the case of the 2-methoxy-5-hydrazinylpyridine, the [3,3]-rearrangement at the 6-position is favored by 4.9 kcal/mol over the rearrangement at the 4-position of the pyridine ring.

The [3,3] rearrangements are, for all but one aza-substituted system, favored by protonation at the  $\beta$  nitrogen. In the only case where the  $\alpha$ -protonated TS is favored, it is only 0.2 kcal/mol lower than the  $\beta$ -protonated TS. We propose the following explanation for the regioselectivity (Scheme S-4). In the transition state, N–N bond cleavage creates two “pieces” of the substrate: a neutral enamine piece and a cationic aromatic ring. This ring is attacked at either the carbon alpha or gamma from the pyridine nitrogen.

**Scheme S-4:** Schematic representation of a [3,3] sigmatropic rearrangement happening with the  $\beta$ -nitrogen of the ene-hydrazine protonated.

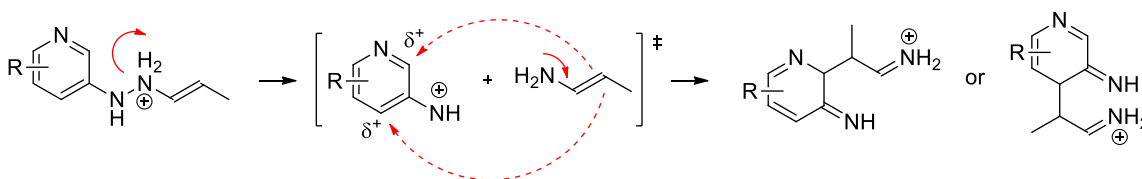

**The preference for attack at either position can be predicted from the extent of positive charge on these carbons, before or at the transition state.** Using NBO analysis, we calculated the charge at these carbons for the aza-substituted substrate and those with a substituent at the 2-position. We also calculated the same charges for the two transition states leading to regioisomeric products. These data are listed below in Table S-2.

**Table S-2:** Relative free energies (in kcal/mol, from their respective global minima) and NBO charges of the  $\beta$ -protonated ene-hydrazine and transition states, for the various 2-substituted 5-pyridylhydrazines.

| entry | R   | 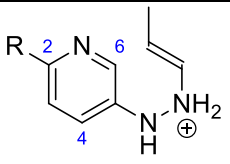 |          |          |  |          |          |  |          |          |
|-------|-----|-----------------------------------------------------------------------------------|----------|----------|------------------------------------------------------------------------------------|----------|----------|-------------------------------------------------------------------------------------|----------|----------|
|       |     | $\Delta G$                                                                        | $z$ (C4) | $z$ (C6) | $\Delta G$                                                                         | $z$ (C4) | $z$ (C6) | $\Delta G$                                                                          | $z$ (C4) | $z$ (C6) |
| 1     | H   | 21.8                                                                              | -0.132   | +0.108   | 35.3                                                                               | -0.082   | +0.164   | 36.7                                                                                | -0.061   | +0.182   |
| 2     | OMe | 14.9                                                                              | -0.110   | +0.146   | 26.3                                                                               | -0.075   | +0.212   | 31.2                                                                                | -0.021   | +0.225   |
| 3     | Cl  | 12.5                                                                              | -0.127   | +0.123   | 27.6                                                                               | -0.072   | +0.178   | 29.1                                                                                | -0.051   | +0.207   |
| 4     | Br  | 12.1                                                                              | -0.132   | +0.117   | 26.8                                                                               | -0.073   | +0.177   | 28.4                                                                                | -0.053   | +0.205   |

For the unsubstituted case (entry 1), the positive charge at C-6 is much greater than that of C-4, both in the ene-hydrazine and in the transition states. Even more important is that this difference is very similar in both transition states, even though they lead to different products. The greater positive charge at C-6 is presumably caused by the proximity of the pyridine nitrogen, which acts as an electronegative element.

For the methoxy-substituted substrate (entry 2), the difference between the partial positive charge at the C-6 and C-4 positions is even greater. Thus, the regioselectivity would be predicted to be higher, which is what the calculated activation barriers predict. The increased difference is attributed to the methoxy substituent at the 2-position. Indeed, this group is located at the *meta* position of both C-4 and C-6 and as such provides a strong electron-withdrawing effect. For C-6, both the pyridine nitrogen and 2-methoxy combine to make attack at this position much easier than at C-4.

For the halogenated substrates (entries 3 and 4), the same explanation is true. The electronegative substituents make the charge at C-6 more positive, in line with these substrates being slightly more regioselective than the unsubstituted case. Once again, the extent of positive charge do not vary significantly if the TS happens at C-4 or C-6, and are very similar to that observed in the ene-hydrazine intermediate.

Therefore, for these Fischer indolization reactions with aza-substituted compounds, analysis of the charges on the reactant are a good way to determine which will be the most favored regioisomer formed during the [3,3]-rearrangement.

## Cartesian coordinates, energies and vibrational frequencies

These geometries and thermal corrections were obtained at the MP2/6-31G(d)/SMD(water) level of theory. Energies were corrected with the SCS-MP2 method. Charges associated with each structure are +1, unless otherwise specified.

### Phenyl hydrazine (S-1)

#### S-3

Charge: 0

|   |          |          |          |
|---|----------|----------|----------|
| C | 3.33631  | -0.40947 | -0.24650 |
| C | 0.87491  | 0.83583  | 0.20608  |
| C | 2.17482  | -1.17414 | -0.15639 |
| C | 3.28002  | 0.98183  | -0.11473 |
| C | 2.04443  | 1.59417  | 0.10111  |
| C | 0.93311  | -0.55705 | 0.06600  |
| N | -0.20779 | -1.39067 | 0.24622  |
| N | -1.43527 | -0.78214 | -0.23399 |
| C | -2.09994 | -0.25072 | 0.73186  |
| C | -3.38459 | 0.47177  | 0.49535  |
| H | 2.22041  | -2.25630 | -0.26892 |
| H | 4.28869  | -0.90470 | -0.42214 |
| H | 4.18517  | 1.57882  | -0.18936 |
| H | 1.98364  | 2.67553  | 0.20279  |
| H | -0.07425 | 1.33556  | 0.37291  |
| H | -1.73568 | -0.31830 | 1.76162  |
| H | -4.15297 | -0.01066 | 1.11390  |
| H | -0.08022 | -2.22599 | -0.32920 |
| H | -3.27220 | 1.48220  | 0.91038  |
| C | -3.82955 | 0.53802  | -0.95856 |
| H | -3.08285 | 1.04393  | -1.57532 |
| H | -3.98543 | -0.46205 | -1.37016 |
| H | -4.77006 | 1.09011  | -1.03741 |

There are no imaginary frequencies.

SCF energy: -456.652627 hartree  
 $\alpha\alpha/\beta\beta$ : -0.19286032 hartree  
 $\alpha\beta$ : -1.08691 hartree  
SCS-MP2 energy: -458.0854918 hartree  
zero-point correction: +0.197432 hartree  
enthalpy correction: +0.209010 hartree  
free energy correction: +0.160136 hartree  
quasiharmonic free energy correction: +0.161979 hartree

#### S-4

Charge: 0

|   |         |          |          |
|---|---------|----------|----------|
| C | 2.82298 | -0.19133 | 0.90330  |
| C | 0.78579 | -0.33010 | -1.00534 |

|   |          |          |          |
|---|----------|----------|----------|
| C | 1.86758  | 0.82328  | 0.83043  |
| C | 2.76056  | -1.28543 | 0.03564  |
| C | 1.73831  | -1.34637 | -0.91579 |
| C | 0.84501  | 0.76158  | -0.12680 |
| N | -0.05655 | 1.84912  | -0.26436 |
| N | -1.43295 | 1.52271  | -0.51510 |
| C | -1.94901 | 0.47531  | 0.28660  |
| C | -2.71700 | -0.52880 | -0.16446 |
| H | 1.90742  | 1.66903  | 1.51572  |
| H | 3.61017  | -0.13186 | 1.65166  |
| H | 3.49969  | -2.07993 | 0.09873  |
| H | 1.68057  | -2.19068 | -1.59931 |
| H | 0.00567  | -0.38056 | -1.76038 |
| H | -1.53442 | 1.31389  | -1.50917 |
| H | -1.74378 | 0.60420  | 1.34924  |
| H | -2.88857 | -0.62056 | -1.23784 |
| H | -0.03031 | 2.44344  | 0.56448  |
| C | -3.38551 | -1.52285 | 0.73496  |
| H | -3.09802 | -2.54832 | 0.47767  |
| H | -3.11708 | -1.34474 | 1.78073  |
| H | -4.47716 | -1.46835 | 0.65345  |

There are no imaginary frequencies.

SCF energy: -456.638210 hartree  
 $\alpha\alpha/\beta\beta$ : -0.19319933 hartree  
 $\alpha\beta$ : -1.08509 hartree  
SCS-MP2 energy: -458.069116 hartree  
zero-point correction: +0.197432 hartree  
enthalpy correction: +0.209071 hartree  
free energy correction: +0.160423 hartree  
quasiharmonic free energy correction: +0.161753 hartree

#### TS 6

Charge: 0

|   |          |          |          |
|---|----------|----------|----------|
| C | -1.32280 | 1.27061  | 0.80076  |
| C | -1.47974 | -1.21303 | -0.50421 |
| C | -0.33841 | 0.28552  | 1.04763  |
| C | -2.30505 | 1.04114  | -0.14700 |
| C | -2.38329 | -0.21115 | -0.80072 |
| C | -0.48621 | -1.02006 | 0.49617  |
| N | 0.40112  | -2.03315 | 0.71971  |
| N | 1.87813  | -1.53454 | -0.50608 |
| C | 2.12678  | -0.24682 | -0.17597 |
| C | 1.36742  | 0.83692  | -0.57591 |



|   |          |          |          |
|---|----------|----------|----------|
| H | 0.36329  | 0.42531  | 1.86780  |
| H | -1.26209 | 2.23001  | 1.30908  |
| H | -3.04554 | 1.80760  | -0.36369 |
| H | -3.15793 | -0.38155 | -1.54491 |
| H | -1.55001 | -2.18962 | -0.97976 |
| H | 1.20128  | -1.54535 | -1.28164 |
| H | 2.88780  | -0.09585 | 0.59280  |
| H | 0.64065  | 0.68007  | -1.37539 |
| H | 0.98344  | -1.78508 | 1.53207  |
| C | 1.73642  | 2.25060  | -0.25756 |
| H | 0.84231  | 2.85328  | -0.07090 |
| H | 2.38586  | 2.30230  | 0.62144  |
| H | 2.26541  | 2.71027  | -1.10153 |

1 imaginary frequency: -302.89 cm<sup>-1</sup>.

SCF energy: -456.557954 hartree  
 $\alpha\alpha/\beta\beta$ : -0.20316385 hartree  
 $\alpha\beta$ : -1.11535 hartree  
SCS-MP2 energy: -458.0318145 hartree  
zero-point correction: +0.196115 hartree  
enthalpy correction: +0.206855 hartree  
free energy correction: +0.161388 hartree  
quasiharmonic free energy correction: +0.161570 hartree

**S-5**

Charge: 0

|   |          |          |          |
|---|----------|----------|----------|
| C | -1.22158 | 1.32230  | 0.60837  |
| C | -1.59925 | -1.27039 | -0.51750 |
| C | -0.10330 | 0.33126  | 0.74976  |
| C | -2.28763 | 1.05681  | -0.17761 |
| C | -2.43846 | -0.24652 | -0.81073 |
| C | -0.53793 | -1.09101 | 0.47125  |
| N | 0.01187  | -2.14384 | 0.99119  |
| N | 2.62129  | -1.14641 | -0.85767 |
| C | 2.20272  | -0.23036 | -0.05804 |
| C | 1.04071  | 0.69650  | -0.26010 |
| H | 0.32775  | 0.38210  | 1.76004  |
| H | -1.11589 | 2.28889  | 1.09480  |
| H | -3.06968 | 1.79880  | -0.31925 |
| H | -3.25936 | -0.39714 | -1.50859 |
| H | -1.74897 | -2.26576 | -0.92940 |
| H | 2.00703  | -1.16829 | -1.68361 |
| H | 2.75831  | -0.09350 | 0.87595  |
| H | 0.64403  | 0.55289  | -1.27478 |
| H | 0.71534  | -1.84595 | 1.68118  |
| C | 1.51178  | 2.14226  | -0.08720 |
| H | 0.71232  | 2.84827  | -0.32233 |
| H | 1.84334  | 2.31965  | 0.94129  |
| H | 2.35126  | 2.34669  | -0.75913 |

There are no imaginary frequencies.

SCF energy: -456.645429 hartree

$\alpha\alpha/\beta\beta$ : -0.19044504 hartree  
 $\alpha\beta$ : -1.09402 hartree  
SCS-MP2 energy: -458.0852191 hartree  
zero-point correction: +0.198401 hartree  
enthalpy correction: +0.209665 hartree  
free energy correction: +0.162498 hartree  
quasiharmonic free energy correction: +0.163153 hartree

**S-7**

|   |          |          |          |
|---|----------|----------|----------|
| C | -2.87754 | -0.96957 | 0.63133  |
| C | -1.31137 | 1.11992  | -0.40334 |
| C | -1.72361 | -1.27296 | -0.09306 |
| C | -3.24634 | 0.36215  | 0.84169  |
| C | -2.46984 | 1.40215  | 0.32149  |
| C | -0.97493 | -0.21607 | -0.59911 |
| N | 0.26356  | -0.51915 | -1.32369 |
| N | 1.39917  | -0.53303 | -0.39555 |
| C | 2.21445  | 0.43997  | -0.60590 |
| C | 3.41513  | 0.61700  | 0.25550  |
| H | 0.40571  | 0.15018  | -2.10333 |
| H | -1.42017 | -2.30229 | -0.27044 |
| H | -3.48472 | -1.77563 | 1.03338  |
| H | -4.14617 | 0.59088  | 1.40630  |
| H | -2.76096 | 2.43609  | 0.48377  |
| H | -0.69302 | 1.91514  | -0.81375 |
| H | 2.06050  | 1.16360  | -1.41208 |
| H | 4.28624  | 0.62351  | -0.41208 |
| H | 0.21216  | -1.46426 | -1.73607 |
| H | 3.35649  | 1.63243  | 0.66863  |
| C | 3.58245  | -0.41388 | 1.36117  |
| H | 2.73033  | -0.40353 | 2.04470  |
| H | 3.67975  | -1.42156 | 0.95025  |
| H | 4.48436  | -0.19158 | 1.93674  |

There are no imaginary frequencies.

SCF energy: -457.109498 hartree  
 $\alpha\alpha/\beta\beta$ : -0.19043871 hartree  
 $\alpha\beta$ : -1.08457 hartree  
SCS-MP2 energy: -458.5379371 hartree  
zero-point correction: +0.212249 hartree  
enthalpy correction: +0.223867 hartree  
free energy correction: +0.174869 hartree  
quasiharmonic free energy correction: +0.176568 hartree

**S-8**

|   |         |          |          |
|---|---------|----------|----------|
| C | 3.32961 | -0.45293 | 0.46450  |
| C | 1.03503 | 0.82112  | -0.51100 |
| C | 2.13259 | -1.16283 | 0.37034  |
| C | 3.38485 | 0.89216  | 0.08799  |
| C | 2.23468 | 1.52531  | -0.38939 |
| C | 0.99080 | -0.51894 | -0.11497 |

|   |          |          |          |
|---|----------|----------|----------|
| N | -0.20340 | -1.28703 | -0.29765 |
| N | -1.35175 | -0.56114 | 0.07903  |
| C | -2.39422 | -0.53626 | -0.67410 |
| C | -3.63513 | 0.17858  | -0.31941 |
| H | 2.07726  | -2.20597 | 0.67600  |
| H | 4.21827  | -0.95260 | 0.84166  |
| H | 4.31685  | 1.44462  | 0.17173  |
| H | 2.27049  | 2.56986  | -0.68812 |
| H | 0.14971  | 1.31146  | -0.90852 |
| H | -2.31993 | -1.09106 | -1.60594 |
| H | -3.86501 | 0.81974  | -1.18039 |
| H | -0.18158 | -2.13238 | 0.28158  |
| H | -4.42528 | -0.58498 | -0.31332 |
| C | -3.60910 | 0.96845  | 0.97972  |
| H | -3.44451 | 0.31572  | 1.84141  |
| H | -2.82974 | 1.73558  | 0.96372  |
| H | -4.57041 | 1.46746  | 1.11610  |
| H | -1.32472 | -0.04815 | 0.97233  |

There are no imaginary frequencies.

SCF energy: -457.117319 hartree  
 $\alpha\alpha/\beta\beta$ : -0.18961699 hartree  
 $\alpha\beta$ : -1.07735 hartree  
SCS-MP2 energy: -458.5365466 hartree  
zero-point correction: +0.211617 hartree  
enthalpy correction: +0.223164 hartree  
free energy correction: +0.174762 hartree  
quasiharmonic free energy correction: +0.176079 hartree

### S-9

|   |          |          |          |
|---|----------|----------|----------|
| C | 1.80085  | -1.38117 | 0.89678  |
| C | 1.67111  | 0.85899  | -0.79264 |
| C | 0.88072  | -0.36792 | 1.17352  |
| C | 2.64215  | -1.28396 | -0.21487 |
| C | 2.58102  | -0.16614 | -1.05313 |
| C | 0.84893  | 0.73514  | 0.32490  |
| N | -0.14453 | 1.78167  | 0.56667  |
| N | -1.42079 | 1.63538  | -0.16436 |
| C | -2.07036 | 0.42701  | 0.22299  |
| C | -2.37064 | -0.54659 | -0.64772 |
| H | 0.22610  | -0.42156 | 2.04033  |
| H | 1.85388  | -2.24828 | 1.54919  |
| H | 3.35525  | -2.07691 | -0.42342 |
| H | 3.24173  | -0.09057 | -1.91216 |
| H | 1.61070  | 1.73822  | -1.43074 |
| H | -1.14232 | 1.58172  | -1.15172 |
| H | -2.39115 | 0.40909  | 1.26261  |
| H | -2.01537 | -0.46298 | -1.67523 |
| H | 0.22758  | 2.71004  | 0.30911  |
| C | -3.20754 | -1.73396 | -0.29601 |
| H | -2.67074 | -2.66233 | -0.51712 |
| H | -3.47329 | -1.72897 | 0.76459  |
| H | -4.13174 | -1.74903 | -0.88365 |

|   |          |         |         |
|---|----------|---------|---------|
| H | -0.39089 | 1.83379 | 1.56913 |
|---|----------|---------|---------|

SCF energy: -457.090831 hartree  
 $\alpha\alpha/\beta\beta$ : -0.19133648 hartree  
 $\alpha\beta$ : -1.08604 hartree  
SCS-MP2 energy: -458.5216367 hartree  
zero-point correction: +0.212245 hartree  
enthalpy correction: +0.223886 hartree  
free energy correction: +0.174923 hartree  
quasiharmonic free energy correction: +0.176622 hartree

There are no imaginary frequencies.

### S-10

|   |          |          |          |
|---|----------|----------|----------|
| C | -2.82540 | -0.37189 | -0.95221 |
| C | -1.17351 | 0.81594  | 0.96986  |
| C | -1.72887 | -1.07587 | -0.45531 |
| C | -3.11545 | 0.91073  | -0.47526 |
| C | -2.29388 | 1.49803  | 0.48995  |
| C | -0.89831 | -0.46875 | 0.49329  |
| N | 0.20304  | -1.22490 | 1.02481  |
| N | 1.25362  | -1.38882 | 0.00693  |
| C | 1.89479  | -0.15614 | -0.44600 |
| C | 3.14681  | 0.11425  | -0.07227 |
| H | -1.51687 | -2.08791 | -0.79619 |
| H | -3.46898 | -0.83596 | -1.69511 |
| H | -3.97992 | 1.44923  | -0.85477 |
| H | -2.51488 | 2.49492  | 0.86273  |
| H | -0.51610 | 1.27301  | 1.70701  |
| H | 1.95099  | -2.03180 | 0.41481  |
| H | 1.26293  | 0.46748  | -1.06741 |
| H | 3.68228  | -0.59700 | 0.55659  |
| H | 0.66430  | -0.68392 | 1.76546  |
| C | 3.86608  | 1.35517  | -0.48326 |
| H | 4.77507  | 1.09887  | -1.03621 |
| H | 3.23787  | 1.99114  | -1.11108 |
| H | 4.17334  | 1.92250  | 0.40084  |
| H | 0.81984  | -1.89338 | -0.78162 |

There are no imaginary frequencies.

SCF energy: -457.092823 hartree  
 $\alpha\alpha/\beta\beta$ : -0.19080449 hartree  
 $\alpha\beta$ : -1.08457 hartree  
SCS-MP2 energy: -458.521506 hartree  
zero-point correction: +0.212874 hartree  
enthalpy correction: +0.224506 hartree  
free energy correction: +0.175632 hartree  
quasiharmonic free energy correction: +0.177040 hartree

### TS S-11

|   |          |         |         |
|---|----------|---------|---------|
| C | -1.34550 | 1.21663 | 0.86828 |
|---|----------|---------|---------|

|   |          |          |          |
|---|----------|----------|----------|
| C | -1.47239 | -1.20155 | -0.57895 |
| C | -0.36821 | 0.22357  | 1.09061  |
| C | -2.31867 | 1.02149  | -0.09678 |
| C | -2.38562 | -0.19319 | -0.81712 |
| C | -0.50962 | -1.02425 | 0.44149  |
| N | 0.47981  | -1.96200 | 0.61136  |
| N | 1.97815  | -1.40932 | -0.46438 |
| C | 2.14146  | -0.11307 | -0.10978 |
| C | 1.36461  | 0.91744  | -0.59614 |
| H | 0.33709  | 0.32204  | 1.91239  |
| H | -1.29470 | 2.14789  | 1.42496  |
| H | -3.06038 | 1.79356  | -0.28327 |
| H | -3.15429 | -0.32985 | -1.57285 |
| H | -1.51927 | -2.14776 | -1.11400 |
| H | 1.38999  | -1.44084 | -1.31115 |
| H | 2.83906  | 0.07830  | 0.70524  |
| H | 0.67645  | 0.69373  | -1.41418 |
| H | 0.96697  | -1.97862 | 1.51244  |
| C | 1.60793  | 2.35032  | -0.27887 |
| H | 0.66110  | 2.88472  | -0.15840 |
| H | 2.21068  | 2.46583  | 0.62539  |
| H | 2.13786  | 2.82354  | -1.11532 |
| H | 0.31985  | -2.89771 | 0.22351  |

1 imaginary frequency: -287.3 cm<sup>-1</sup>.

SCF energy: -457.038603 hartree  
 $\alpha\alpha/\beta\beta$ : -0.19896648 hartree  
 $\alpha\beta$ : -1.10513 hartree  
SCS-MP2 energy: -458.4973999 hartree  
zero-point correction: +0.210714 hartree  
enthalpy correction: +0.221483 hartree  
free energy correction: +0.175962 hartree  
quasiharmonic free energy correction: +0.176247 hartree

#### TS 7

|   |          |          |          |
|---|----------|----------|----------|
| C | -1.52070 | 1.06853  | 0.88462  |
| C | -1.31337 | -1.32010 | -0.59401 |
| C | -0.44786 | 0.18995  | 1.12813  |
| C | -2.42654 | 0.78617  | -0.12647 |
| C | -2.32240 | -0.41580 | -0.86274 |
| C | -0.39701 | -1.06590 | 0.46294  |
| N | 0.60840  | -1.96807 | 0.66910  |
| N | 2.00777  | -1.22280 | -0.41857 |
| C | 2.15437  | 0.10090  | -0.12650 |
| C | 1.23301  | 1.00623  | -0.59095 |
| H | 0.22556  | 0.36717  | 1.96490  |
| H | -1.60183 | 1.99011  | 1.45471  |
| H | -3.24342 | 1.47302  | -0.33411 |
| H | -3.03944 | -0.62365 | -1.65282 |
| H | -1.23697 | -2.26067 | -1.13504 |
| H | 1.54622  | -1.47038 | -1.29916 |
| H | 2.87742  | 0.33978  | 0.64706  |
| H | 0.55224  | 0.69305  | -1.38282 |

|   |         |          |          |
|---|---------|----------|----------|
| H | 1.09918 | -1.71358 | 1.54047  |
| C | 1.32390 | 2.46313  | -0.29055 |
| H | 0.32745 | 2.88397  | -0.13228 |
| H | 1.94401 | 2.65376  | 0.58825  |
| H | 1.76309 | 2.98205  | -1.15047 |
| H | 2.77298 | -1.85723 | -0.16915 |

1 imaginary frequency: -348.55 cm<sup>-1</sup>.

SCF energy: -457.035454 hartree  
 $\alpha\alpha/\beta\beta$ : -0.19937008 hartree  
 $\alpha\beta$ : -1.10869 hartree  
SCS-MP2 energy: -458.4987894 hartree  
zero-point correction: +0.210125 hartree  
enthalpy correction: +0.221070 hartree  
free energy correction: +0.175054 hartree  
quasiharmonic free energy correction: +0.175375 hartree

#### S-12

|   |          |          |          |
|---|----------|----------|----------|
| C | -0.25254 | -1.52838 | -0.28687 |
| C | -2.15100 | 0.57349  | -0.03794 |
| C | 0.17814  | -0.17521 | -0.75030 |
| C | -1.51195 | -1.78804 | 0.13186  |
| C | -2.47209 | -0.71984 | 0.23881  |
| C | -0.82226 | 0.90268  | -0.45906 |
| N | -0.53259 | 2.15645  | -0.70504 |
| N | 0.61912  | 0.43650  | 1.86995  |
| C | 1.68153  | 0.45849  | 1.15015  |
| C | 1.61857  | 0.19559  | -0.32516 |
| H | 0.19609  | -0.23529 | -1.85627 |
| H | 0.46521  | -2.33685 | -0.38916 |
| H | -1.80899 | -2.79496 | 0.40852  |
| H | -3.48416 | -0.95248 | 0.56169  |
| H | -2.87482 | 1.37660  | 0.07705  |
| H | 0.85942  | 0.63606  | 2.84856  |
| H | 2.67906  | 0.66364  | 1.55511  |
| H | 1.90723  | 1.12147  | -0.84185 |
| H | 0.38709  | 2.45775  | -1.01900 |
| C | 2.65419  | -0.85748 | -0.73202 |
| H | 3.65911  | -0.46621 | -0.54947 |
| H | 2.54271  | -1.78058 | -0.15867 |
| H | 2.56656  | -1.08981 | -1.79728 |
| H | -1.23571 | 2.88208  | -0.57046 |

There are no imaginary frequencies.

SCF energy: -457.124712 hartree  
 $\alpha\alpha/\beta\beta$ : -0.18845583 hartree  
 $\alpha\beta$ : -1.08463 hartree  
SCS-MP2 energy: -458.5519034 hartree  
zero-point correction: +0.211699 hartree  
enthalpy correction: +0.223055 hartree  
free energy correction: +0.176371 hartree

quasi-harmonic free energy correction: +0.176583 hartree

**S-13**

|   |          |          |          |
|---|----------|----------|----------|
| C | -1.32307 | -1.36312 | -0.48485 |
| C | -1.94240 | 1.34152  | 0.22421  |
| C | -0.24922 | -0.33532 | -0.68727 |
| C | -2.56420 | -1.01596 | -0.08636 |
| C | -2.88541 | 0.36762  | 0.23830  |
| C | -0.55162 | 1.01341  | -0.06615 |
| N | 0.45680  | 1.79759  | 0.13420  |
| N | 3.29178  | 0.28688  | 0.00640  |
| C | 2.18808  | 0.12221  | -0.64028 |
| C | 1.13307  | -0.84326 | -0.23222 |
| H | -0.19038 | -0.15755 | -1.77691 |
| H | -1.08557 | -2.39250 | -0.74843 |
| H | -3.34464 | -1.76665 | 0.00612  |
| H | -3.91075 | 0.61330  | 0.50593  |
| H | 3.45328  | -0.14418 | 0.91604  |
| H | 2.12189  | 0.60726  | -1.60946 |
| H | 1.34935  | -1.73705 | -0.84177 |
| H | 0.14182  | 2.70799  | 0.49570  |
| C | 1.17230  | -1.22195 | 1.24498  |
| H | 2.10896  | -1.72197 | 1.51017  |
| H | 1.05129  | -0.33806 | 1.87644  |
| H | 0.35883  | -1.91791 | 1.46255  |
| H | -2.17925 | 2.36392  | 0.51347  |
| H | 4.01987  | 0.90128  | -0.35627 |

There are no imaginary frequencies.

SCF energy: -457.120322 hartree  
 $\alpha\alpha/\beta\beta$ : -0.18792143 hartree  
 $\alpha\beta$ : -1.08544 hartree  
SCS-MP2 energy: -458.5481343 hartree  
zero-point correction: +0.212146 hartree  
enthalpy correction: +0.223361 hartree  
free energy correction: +0.176713 hartree  
quasi-harmonic free energy correction: +0.177275 hartree

**3-pyridylhydrazine (41)**

**S-14**

|   |          |          |          |
|---|----------|----------|----------|
| C | -1.33703 | 1.13633  | -0.37962 |
| C | -1.73559 | -1.23913 | -0.08485 |
| C | -3.20597 | 0.25790  | 0.84897  |
| C | -2.49420 | 1.35556  | 0.36230  |
| C | -0.98252 | -0.18918 | -0.59472 |
| N | 0.24412  | -0.49549 | -1.32715 |
| N | 1.38203  | -0.51870 | -0.39905 |
| C | 2.20626  | 0.44607  | -0.61397 |
| C | 3.41029  | 0.60971  | 0.24493  |
| H | 0.38440  | 0.17656  | -2.10566 |

|   |          |          |          |
|---|----------|----------|----------|
| H | -1.44542 | -2.27286 | -0.26362 |
| H | -4.10880 | 0.40870  | 1.43474  |
| H | -2.84030 | 2.36392  | 0.56541  |
| H | -0.74174 | 1.95469  | -0.77795 |
| H | 2.05797  | 1.16937  | -1.42141 |
| H | 4.27960  | 0.60684  | -0.42495 |
| H | 0.18622  | -1.43964 | -1.74318 |
| H | 3.36325  | 1.62584  | 0.65772  |
| C | 3.56825  | -0.42297 | 1.35036  |
| H | 2.71844  | -0.40220 | 2.03651  |
| H | 3.65224  | -1.43188 | 0.93956  |
| H | 4.47443  | -0.21108 | 1.92308  |
| N | -2.84861 | -1.02495 | 0.63753  |

There are no imaginary frequencies.

SCF energy: -473.102350 hartree  
 $\alpha\alpha/\beta\beta$ : -0.19623821 hartree  
 $\alpha\beta$ : -1.1048809 hartree  
SCS-MP2 energy: -474.5590326 hartree  
zero-point correction: +0.201149 hartree  
enthalpy correction: +0.212480 hartree  
free energy correction: +0.164269 hartree  
quasi-harmonic free energy correction: +0.165494 hartree

**S-15**

|   |          |          |          |
|---|----------|----------|----------|
| C | -1.94397 | 1.28991  | 0.02793  |
| C | -1.38985 | -1.05228 | -0.16556 |
| C | -3.60503 | -0.43080 | -0.19691 |
| C | -3.28076 | 0.92069  | -0.07544 |
| C | -0.98322 | 0.27698  | -0.01289 |
| N | 0.39338  | 0.60714  | 0.01558  |
| N | 1.15963  | -0.24921 | 0.80299  |
| C | 2.44268  | -0.33647 | 0.69665  |
| C | 3.23049  | 0.45360  | -0.27003 |
| H | 0.57201  | 1.57627  | 0.29612  |
| H | -0.66039 | -1.85663 | -0.23806 |
| H | -4.64300 | -0.74556 | -0.26715 |
| H | -4.06558 | 1.67062  | -0.04666 |
| H | -1.64592 | 2.32999  | 0.14198  |
| H | 2.90914  | -1.02644 | 1.39549  |
| H | 3.41625  | 1.43412  | 0.19215  |
| H | 2.61218  | 0.64276  | -1.15413 |
| C | 4.54936  | -0.22752 | -0.62271 |
| H | 4.37456  | -1.18659 | -1.11569 |
| H | 5.11982  | 0.40859  | -1.30279 |
| H | 5.15135  | -0.39926 | 0.27308  |
| N | -2.68396 | -1.41335 | -0.24067 |
| H | 0.65802  | -0.82462 | 1.49420  |

There are no imaginary frequencies.

SCF energy: -473.107576 hartree  
 $\alpha\alpha/\beta\beta$ : -0.196319439 hartree

$\alpha\beta$ : -1.1003748 hartree  
 SCS-MP2 energy: -474.5589054 hartree  
 zero-point correction: +0.200138 hartree  
 enthalpy correction: +0.211601 hartree  
 free energy correction: +0.162984 hartree  
 quasiharmonic free energy correction: +0.164406 hartree

**10**

|   |          |          |          |
|---|----------|----------|----------|
| C | 2.10474  | -1.25190 | 0.01629  |
| C | 1.08163  | 0.93386  | -0.09124 |
| C | 3.45797  | 0.73728  | 0.09357  |
| C | 3.35070  | -0.64810 | 0.10469  |
| C | 0.93977  | -0.46286 | -0.07995 |
| N | -0.28458 | -1.05410 | -0.20729 |
| N | -1.41524 | -0.27059 | -0.10584 |
| C | -2.52517 | -0.91112 | 0.05249  |
| C | -3.82526 | -0.18397 | 0.15215  |
| H | -0.35890 | -2.05031 | 0.01571  |
| H | 2.01334  | -2.33539 | 0.02943  |
| H | -2.54094 | -2.00513 | 0.12279  |
| H | -4.27837 | -0.44010 | 1.11906  |
| H | -4.50150 | -0.60175 | -0.60504 |
| C | -3.72611 | 1.32702  | -0.00312 |
| H | -3.31159 | 1.59524  | -0.97802 |
| H | -4.71848 | 1.77748  | 0.08342  |
| H | -3.08553 | 1.76195  | 0.76801  |
| N | 2.32019  | 1.45436  | -0.00139 |
| H | 2.39847  | 2.47534  | -0.00704 |
| H | 0.25666  | 1.62954  | -0.15786 |
| H | 4.25018  | -1.24880 | 0.18278  |
| H | 4.38443  | 1.29307  | 0.15908  |

There are no imaginary frequencies.

SCF energy: -473.115264 hartree  
 $\alpha\alpha/\beta\beta$ : -0.197668102 hartree  
 $\alpha\beta$ : -1.1080868 hartree  
 SCS-MP2 energy: -474.5767469 hartree  
 zero-point correction: +0.199710 hartree  
 enthalpy correction: +0.211292 hartree  
 free energy correction: +0.162699 hartree  
 quasiharmonic free energy correction: +0.164019 hartree

**S-16**

|   |          |          |          |
|---|----------|----------|----------|
| C | -1.58901 | 0.76195  | -0.90467 |
| C | -0.93306 | -0.24223 | 1.20433  |
| C | -2.49512 | -1.31144 | -0.09699 |
| C | -2.44937 | -0.31837 | -1.07740 |
| C | -0.83954 | 0.77870  | 0.26522  |
| N | 0.13409  | 1.84422  | 0.47618  |
| N | 1.43968  | 1.64782  | -0.19415 |
| C | 2.02022  | 0.41633  | 0.23394  |

|   |          |          |          |
|---|----------|----------|----------|
| C | 2.28067  | -0.59184 | -0.61015 |
| H | 0.33986  | 1.96314  | 1.48249  |
| H | -0.34771 | -0.21266 | 2.12156  |
| H | -3.15550 | -2.16629 | -0.21614 |
| H | -3.07514 | -0.39448 | -1.96084 |
| H | -1.51100 | 1.56151  | -1.63826 |
| H | 1.20160  | 1.59395  | -1.19206 |
| H | 2.31378  | 0.40282  | 1.28144  |
| H | 1.95281  | -0.50824 | -1.64678 |
| H | -0.23099 | 2.75102  | 0.13991  |
| C | 3.03023  | -1.82340 | -0.21619 |
| H | 3.96455  | -1.90828 | -0.78122 |
| H | 3.27024  | -1.81602 | 0.85040  |
| H | 2.43864  | -2.71814 | -0.43590 |
| N | -1.76109 | -1.28725 | 1.03324  |

There are no imaginary frequencies.

SCF energy: -473.083541 hartree  
 $\alpha\alpha/\beta\beta$ : -0.197202704 hartree  
 $\alpha\beta$ : -1.1064938 hartree  
 SCS-MP2 energy: -474.5428021 hartree  
 zero-point correction: +0.201510 hartree  
 enthalpy correction: +0.212796 hartree  
 free energy correction: +0.164806 hartree  
 quasiharmonic free energy correction: +0.166092 hartree

**11**

|   |          |          |          |
|---|----------|----------|----------|
| C | -1.07854 | -0.51828 | -1.21352 |
| C | -0.90742 | -0.57808 | 1.19269  |
| C | -2.62471 | 0.60875  | 0.23693  |
| C | -2.20221 | 0.28641  | -1.05366 |
| C | -0.41605 | -0.94581 | -0.06176 |
| N | 0.74172  | -1.77840 | -0.19545 |
| N | 1.92296  | -0.93307 | -0.48770 |
| C | 2.27060  | 0.01616  | 0.56611  |
| C | 1.93725  | 1.31054  | 0.52468  |
| H | 0.96468  | -2.20768 | 0.71095  |
| H | -0.40502 | -0.91950 | 2.09660  |
| H | -3.50241 | 1.23268  | 0.38638  |
| H | -2.75550 | 0.65017  | -1.91422 |
| H | -0.71767 | -0.81124 | -2.19711 |
| H | 2.70022  | -1.59182 | -0.65468 |
| H | 2.77208  | -0.46014 | 1.40054  |
| H | 2.23398  | 1.88058  | 1.40291  |
| H | 1.73714  | -0.47432 | -1.39179 |
| C | 1.22838  | 2.07525  | -0.54563 |
| H | 1.79511  | 2.98103  | -0.78012 |
| H | 1.07866  | 1.51452  | -1.47026 |
| H | 0.24604  | 2.39074  | -0.17756 |
| N | -2.00627 | 0.18078  | 1.35647  |

There are no imaginary frequencies.

SCF energy: -473.083890 hartree  
 $\alpha\alpha/\beta\beta$ : -0.197669903 hartree  
 $\alpha\beta$ : -1.1074871 hartree  
SCS-MP2 energy: -474.5446544 hartree  
zero-point correction: +0.201857 hartree  
enthalpy correction: +0.212953 hartree  
free energy correction: +0.165695 hartree  
quasiharmonic free energy correction: +0.166686 hartree

**S-17**

|   |          |          |          |
|---|----------|----------|----------|
| C | 1.51315  | 0.07905  | 1.31911  |
| C | 1.05287  | -0.50344 | -0.97504 |
| C | 2.99355  | 0.78456  | -0.44208 |
| C | 2.65867  | 0.74605  | 0.90536  |
| C | 0.68831  | -0.56078 | 0.37511  |
| N | -0.41119 | -1.29183 | 0.78714  |
| N | -1.37720 | -1.53746 | -0.20738 |
| C | -2.39134 | -0.55778 | -0.32932 |
| C | -2.34040 | 0.70056  | 0.13675  |
| H | -0.80938 | -0.94633 | 1.66708  |
| H | 1.24191  | 0.05001  | 2.37193  |
| H | -1.75980 | -2.47235 | -0.07545 |
| H | -3.23590 | -0.91341 | -0.91703 |
| H | -1.48388 | 1.04430  | 0.71323  |
| C | -3.43493 | 1.69290  | -0.11850 |
| H | -3.06112 | 2.56391  | -0.66831 |
| H | -4.24376 | 1.24492  | -0.70335 |
| H | -3.86071 | 2.06634  | 0.81934  |
| N | 2.17515  | 0.16061  | -1.31206 |
| H | 0.48497  | -0.95882 | -1.77499 |
| H | 2.41951  | 0.18915  | -2.30630 |
| H | 3.29888  | 1.24426  | 1.62501  |
| H | 3.86261  | 1.28198  | -0.85334 |

There are no imaginary frequencies.

SCF energy: -473.098235 hartree  
 $\alpha\alpha/\beta\beta$ : -0.197450702 hartree  
 $\alpha\beta$ : -1.10504 hartree  
SCS-MP2 energy: -474.5559168 hartree  
zero-point correction: +0.200572 hartree  
enthalpy correction: +0.211915 hartree  
free energy correction: +0.164062 hartree  
quasiharmonic free energy correction: +0.165281 hartree

**TS S-18**

|   |          |          |          |
|---|----------|----------|----------|
| C | -1.53394 | -1.13471 | -0.60403 |
| C | -0.39887 | 0.22295  | 1.07405  |
| C | -2.20328 | 1.10627  | -0.03623 |
| C | -2.37636 | -0.06192 | -0.80733 |
| C | -0.56253 | -1.01312 | 0.41169  |
| N | 0.39575  | -1.98123 | 0.57957  |

|   |          |          |          |
|---|----------|----------|----------|
| N | 1.91953  | -1.45873 | -0.46855 |
| C | 2.12442  | -0.17495 | -0.09191 |
| C | 1.40618  | 0.89227  | -0.58959 |
| H | 0.30048  | 0.30544  | 1.90343  |
| H | -2.87423 | 1.95024  | -0.17898 |
| H | -3.16593 | -0.10402 | -1.55121 |
| H | -1.63183 | -2.06310 | -1.16259 |
| H | 1.34771  | -1.46290 | -1.32732 |
| H | 2.81002  | -0.02193 | 0.74081  |
| H | 0.72216  | 0.70477  | -1.42055 |
| H | 0.87199  | -2.02278 | 1.48651  |
| C | 1.67978  | 2.30883  | -0.23585 |
| H | 0.73978  | 2.84571  | -0.07568 |
| H | 2.30362  | 2.38872  | 0.65754  |
| H | 2.19223  | 2.80193  | -1.07138 |
| H | 0.20801  | -2.90756 | 0.17989  |
| N | -1.26334 | 1.25593  | 0.90251  |

1 imaginary frequency: -287.93 cm<sup>-1</sup>.

SCF energy: -473.033458 hartree  
 $\alpha\alpha/\beta\beta$ : -0.204538007 hartree  
 $\alpha\beta$ : -1.1250785 hartree  
SCS-MP2 energy: -474.5199109 hartree  
zero-point correction: +0.199024 hartree  
enthalpy correction: +0.209672 hartree  
free energy correction: +0.164306 hartree  
quasiharmonic free energy correction: +0.164588 hartree

**TS S-19**

|   |          |          |          |
|---|----------|----------|----------|
| C | 1.30243  | 1.27066  | 0.80878  |
| C | 1.55250  | -1.09350 | -0.57196 |
| C | 0.36038  | 0.25651  | 1.07250  |
| C | 2.26896  | 1.05345  | -0.15299 |
| C | 0.56486  | -0.98710 | 0.43723  |
| N | -0.34835 | -1.99235 | 0.59630  |
| N | -1.90619 | -1.48563 | -0.47127 |
| C | -2.12076 | -0.21148 | -0.08541 |
| C | -1.41419 | 0.87163  | -0.57772 |
| H | -0.33750 | 0.34037  | 1.90203  |
| H | 1.24731  | 2.22153  | 1.32902  |
| H | 2.99730  | 1.82417  | -0.38875 |
| H | 1.66245  | -2.02965 | -1.11855 |
| H | -1.32313 | -1.47908 | -1.32273 |
| H | -2.80480 | -0.06917 | 0.75073  |
| H | -0.73964 | 0.69776  | -1.41915 |
| H | -0.84084 | -2.05566 | 1.49239  |
| C | -1.73414 | 2.28151  | -0.23378 |
| H | -0.81940 | 2.87424  | -0.14224 |
| H | -2.31249 | 2.35067  | 0.69061  |
| H | -2.32048 | 2.72412  | -1.04930 |
| H | -0.13254 | -2.90564 | 0.18146  |
| N | 2.40359  | -0.11399 | -0.85152 |

1 imaginary frequency:  $-252.36 \text{ cm}^{-1}$ .

SCF energy: -473.030379 hartree  
 $\alpha\alpha/\beta\beta$ : -0.204906085 hartree  
 $\alpha\beta$ : -1.1259987 hartree  
SCS-MP2 energy: -474.5181815 hartree  
zero-point correction: +0.199022 hartree  
enthalpy correction: +0.209667 hartree  
free energy correction: +0.164290 hartree  
quasiharmonic free energy correction: +0.164555 hartree

**TS 8**

|   |          |          |          |
|---|----------|----------|----------|
| C | -1.37622 | -1.29270 | -0.59112 |
| C | -0.44338 | 0.20384  | 1.08060  |
| C | -2.32020 | 0.85757  | -0.06074 |
| C | -2.33394 | -0.33093 | -0.82403 |
| C | -0.42975 | -1.06336 | 0.44015  |
| N | 0.55746  | -1.98305 | 0.64687  |
| N | 1.96967  | -1.25059 | -0.44108 |
| C | 2.13882  | 0.06057  | -0.12605 |
| C | 1.22730  | 0.98997  | -0.57380 |
| H | 0.22593  | 0.38036  | 1.92162  |
| H | -3.08817 | 1.61080  | -0.22539 |
| H | -3.09954 | -0.46961 | -1.58169 |
| H | -1.35660 | -2.23387 | -1.13571 |
| H | 1.50289  | -1.47955 | -1.32441 |
| H | 2.85973  | 0.27402  | 0.65692  |
| H | 0.55236  | 0.70677  | -1.38219 |
| H | 1.05291  | -1.73885 | 1.51898  |
| C | 1.34159  | 2.43848  | -0.24552 |
| H | 0.35008  | 2.87140  | -0.09386 |
| H | 1.95323  | 2.60096  | 0.64447  |
| H | 1.80228  | 2.96081  | -1.09185 |
| H | 2.71620  | -1.90785 | -0.19223 |
| N | -1.42664 | 1.12564  | 0.89255  |

1 imaginary frequency:  $-357.39 \text{ cm}^{-1}$ .

SCF energy: -473.029812 hartree  
 $\alpha\alpha/\beta\beta$ : -0.205144369 hartree  
 $\alpha\beta$ : -1.1281928 hartree  
SCS-MP2 energy: -474.5204063 hartree  
zero-point correction: +0.198491 hartree  
enthalpy correction: +0.209266 hartree  
free energy correction: +0.163541 hartree  
quasiharmonic free energy correction: +0.163855 hartree

**TS S-20**

|   |         |          |          |
|---|---------|----------|----------|
| C | 1.49707 | 1.08755  | 0.82727  |
| C | 1.36290 | -1.25797 | -0.58905 |
| C | 0.42715 | 0.21242  | 1.10076  |
| C | 2.39311 | 0.75625  | -0.16901 |

|   |          |          |          |
|---|----------|----------|----------|
| C | 0.41807  | -1.04884 | 0.45682  |
| N | -0.53971 | -1.99957 | 0.64091  |
| N | -1.99269 | -1.23741 | -0.42742 |
| C | -2.13914 | 0.06839  | -0.10050 |
| C | -1.22936 | 0.99429  | -0.56903 |
| H | -0.24047 | 0.39438  | 1.94101  |
| H | 1.59675  | 2.02703  | 1.36244  |
| H | 3.21866  | 1.41871  | -0.41568 |
| H | 1.32323  | -2.19311 | -1.14647 |
| H | -1.53192 | -1.47066 | -1.31252 |
| H | -2.84157 | 0.28812  | 0.69749  |
| H | -0.57666 | 0.70412  | -1.39293 |
| H | -1.03948 | -1.78838 | 1.51880  |
| C | -1.34001 | 2.44566  | -0.25224 |
| H | -0.34904 | 2.89702  | -0.16207 |
| H | -1.90632 | 2.61510  | 0.66588  |
| H | -1.85288 | 2.94715  | -1.08132 |
| H | -2.73353 | -1.89363 | -0.16043 |
| N | 2.33161  | -0.40478 | -0.89125 |

1 imaginary frequency:  $-328.85 \text{ cm}^{-1}$ .

SCF energy: -473.027140 hartree  
 $\alpha\alpha/\beta\beta$ : -0.205228808 hartree  
 $\alpha\beta$ : -1.1289403 hartree  
SCS-MP2 energy: -474.5186876 hartree  
zero-point correction: +0.198867 hartree  
enthalpy correction: +0.209493 hartree  
free energy correction: +0.164206 hartree  
quasiharmonic free energy correction: +0.164406 hartree

**TS S-21**

|   |          |          |          |
|---|----------|----------|----------|
| C | -1.55351 | -1.20092 | -0.44071 |
| C | -0.25131 | 0.30374  | 0.95458  |
| C | -2.20939 | 1.09287  | -0.16056 |
| C | -2.40552 | -0.15939 | -0.75236 |
| C | -0.50081 | -1.02357 | 0.49047  |
| N | 0.35269  | -2.05700 | 0.71173  |
| N | 1.79163  | -1.59351 | -0.54505 |
| C | 2.10495  | -0.33381 | -0.18183 |
| C | 1.38850  | 0.79382  | -0.56641 |
| H | 0.39204  | 0.50975  | 1.80393  |
| H | -1.08077 | 2.17903  | 1.13121  |
| H | -2.85344 | 1.94905  | -0.32697 |
| H | -3.23201 | -0.28998 | -1.44182 |
| H | -1.70640 | -2.19191 | -0.86217 |
| H | 1.11779  | -1.56642 | -1.32352 |
| H | 2.85700  | -0.23769 | 0.60271  |
| H | 0.67558  | 0.68498  | -1.38750 |
| H | 0.95510  | -1.83264 | 1.51651  |
| C | 1.83265  | 2.18023  | -0.22811 |
| H | 0.97696  | 2.84137  | -0.06101 |
| H | 2.46947  | 2.18706  | 0.66028  |
| H | 2.40098  | 2.59701  | -1.06771 |

N -1.20228 1.25802 0.69984

1 imaginary frequency: -264.93 cm<sup>-1</sup>.

SCF energy: -473.018260 hartree  
 $\alpha\alpha/\beta\beta$ : -0.206752453 hartree  
 $\alpha\beta$ : -1.1316291 hartree  
SCS-MP2 energy: -474.5140498 hartree  
zero-point correction: +0.199037 hartree  
enthalpy correction: +0.209629 hartree  
free energy correction: +0.164478 hartree  
quasi-harmonic free energy correction: +0.164537 hartree

**TS S-22**

C 1.14892 1.36346 0.74498  
C 1.56511 -1.12069 -0.41987  
C 0.22499 0.32174 0.99785  
C 2.18984 1.16303 -0.12786  
C 0.50978 -0.99315 0.50725  
N -0.27376 -2.08742 0.68713  
N -1.76871 -1.61929 -0.55431  
C -2.10173 -0.37725 -0.16494  
C -1.43005 0.77678 -0.56162  
H -0.47928 0.42992 1.81939  
H 1.02165 2.34014 1.19977  
H 2.92877 1.90707 -0.39688  
H 3.13128 -0.21704 -1.32911  
H 1.80627 -2.06139 -0.90424  
H -1.09925 -1.56335 -1.33552  
H -2.83886 -0.30734 0.63637  
H -0.72768 0.68649 -1.39301  
H -0.89188 -1.92137 1.49389  
C -1.91738 2.14756 -0.22419  
H -1.08581 2.85270 -0.14732  
H -2.48209 2.14939 0.71180  
H -2.57496 2.50547 -1.02554  
N 2.35031 -0.07752 -0.68127

1 imaginary frequency: -208.85 cm<sup>-1</sup>.

SCF energy: -473.015197 hartree  
 $\alpha\alpha/\beta\beta$ : -0.206856213 hartree  
 $\alpha\beta$ : -1.1333961 hartree  
SCS-MP2 energy: -474.5131765 hartree  
zero-point correction: +0.198783 hartree  
enthalpy correction: +0.209350 hartree  
free energy correction: +0.164278 hartree  
quasi-harmonic free energy correction: +0.164372 hartree

**S-23**

C -1.72879 1.18934 0.50915  
C -0.01449 -0.23298 -0.73164

C -2.26303 -0.94687 -0.54722  
C -2.62686 0.20476 0.26701  
C -0.41289 1.04609 -0.05257  
N 0.44692 2.01644 0.03352  
N 2.75132 0.56686 -0.59264  
C 2.43189 -0.53922 -0.02171  
C 1.02365 -1.04248 0.09478  
H 0.46499 0.03145 -1.68279  
H -3.03850 -1.67666 -0.77333  
H -3.63727 0.26413 0.66138  
H -1.97259 2.08209 1.07932  
H 3.76748 0.70152 -0.56119  
H 3.18091 -1.20467 0.42070  
H 1.02554 -2.04138 -0.36110  
C 0.62867 -1.19577 1.56678  
H 1.30203 -1.90351 2.05826  
H 0.69345 -0.23996 2.09515  
H -0.39154 -1.58132 1.65157  
N -1.08846 -1.16661 -1.04999  
H 0.20664 2.88791 0.50966  
H 1.40147 1.86639 -0.34142

There are no imaginary frequencies.

SCF energy: -473.119293 hartree  
 $\alpha\alpha/\beta\beta$ : -0.194637184 hartree  
 $\alpha\beta$ : -1.1098708 hartree  
SCS-MP2 energy: -474.5808961 hartree  
zero-point correction: +0.200543 hartree  
enthalpy correction: +0.211427 hartree  
free energy correction: +0.165739 hartree  
quasi-harmonic free energy correction: +0.165818 hartree

**S-24**

C 0.00201 -0.26039 -0.73104  
C 1.74963 1.15459 0.48251  
C 2.39722 -0.87718 -0.45140  
C 1.17885 -1.15015 -0.95761  
C 0.40620 1.01519 -0.06804  
N -0.42239 2.00531 0.03782  
N -2.73994 0.61409 -0.60406  
C -2.46358 -0.51636 -0.05898  
C -1.06947 -1.05191 0.08436  
H 1.97579 2.05014 1.06102  
H 1.00720 -2.06527 -1.51831  
H -0.45585 -0.00767 -1.69918  
H -3.75247 0.77615 -0.59463  
H -3.24080 -1.17439 0.34425  
H -1.08876 -2.05821 -0.35611  
C -0.69989 -1.19126 1.56532  
H 0.31151 -1.59577 1.66783  
H -0.75180 -0.22558 2.07698  
H -1.39464 -1.87571 2.06005  
N 2.68786 0.27124 0.30797



|   |          |          |          |
|---|----------|----------|----------|
| H | 3.24103  | -1.54112 | -0.60348 |
| H | -0.14629 | 2.87458  | 0.50203  |
| H | -1.38927 | 1.87325  | -0.32330 |

There are no imaginary frequencies.

SCF energy: -473.104261 hartree  
 $\alpha\alpha/\beta\beta$ : -0.194964158 hartree  
 $\alpha\beta$ : -1.1113761 hartree  
SCS-MP2 energy: -474.5678884 hartree  
zero-point correction: +0.199764 hartree  
enthalpy correction: +0.210753 hartree  
free energy correction: +0.164663 hartree  
quasiharmonic free energy correction: +0.164927 hartree

**S-25**

|   |          |          |          |
|---|----------|----------|----------|
| C | -1.68820 | 1.18043  | 0.59288  |
| C | -0.04194 | -0.20344 | -0.77436 |
| C | -2.28968 | -0.89926 | -0.52380 |
| C | -2.60459 | 0.21296  | 0.36917  |
| C | -0.39960 | 1.09726  | -0.07973 |
| N | 0.46325  | 2.06134  | -0.12048 |
| N | 2.78908  | 0.57542  | -0.33413 |
| C | 2.39336  | -0.61304 | -0.04982 |
| C | 0.97606  | -1.05555 | 0.02147  |
| H | 0.13410  | 2.87564  | 0.41308  |
| H | 0.42191  | 0.05476  | -1.73452 |
| H | -3.08839 | -1.60490 | -0.75207 |
| H | -3.58918 | 0.24617  | 0.82742  |
| H | -1.89585 | 2.04514  | 1.22067  |
| H | 3.16280  | -1.34833 | 0.17580  |
| H | 0.97225  | -2.04765 | -0.44734 |
| C | 0.60764  | -1.23853 | 1.50360  |
| H | 1.28055  | -1.95972 | 1.97514  |
| H | 0.67761  | -0.29051 | 2.04301  |
| H | -0.41312 | -1.62186 | 1.57780  |
| N | -1.14704 | -1.11781 | -1.09295 |
| H | 3.78850  | 0.78887  | -0.34475 |
| H | 2.09356  | 1.34478  | -0.47776 |

There are no imaginary frequencies.

SCF energy: -473.115811 hartree  
 $\alpha\alpha/\beta\beta$ : -0.194397138 hartree  
 $\alpha\beta$ : -1.1106933 hartree  
SCS-MP2 energy: -474.5782411 hartree  
zero-point correction: +0.201042 hartree  
enthalpy correction: +0.211863 hartree  
free energy correction: +0.166155 hartree  
quasiharmonic free energy correction: +0.166484 hartree

**S-26**

|   |          |          |          |
|---|----------|----------|----------|
| C | 0.01708  | -0.23271 | -0.77588 |
| C | 1.71435  | 1.13239  | 0.56571  |
| C | 2.40957  | -0.84093 | -0.43392 |
| C | 1.21984  | -1.09990 | -1.00411 |
| C | 0.40175  | 1.06315  | -0.09902 |
| N | -0.41547 | 2.06449  | -0.11983 |
| N | -2.79278 | 0.61121  | -0.36113 |
| C | -2.43174 | -0.58520 | -0.06319 |
| C | -1.02578 | -1.06020 | 0.02332  |
| H | 1.90000  | 1.99369  | 1.21073  |
| H | 1.09355  | -1.98352 | -1.62533 |
| H | -0.42770 | 0.01402  | -1.75047 |
| H | -3.22401 | -1.29638 | 0.16104  |
| H | -1.04469 | -2.06352 | -0.42268 |
| H | -0.03281 | 2.86828  | 0.39637  |
| C | -0.66383 | -1.21822 | 1.51031  |
| H | 0.35270  | -1.61309 | 1.58869  |
| H | -0.72010 | -0.25765 | 2.02905  |
| H | -1.34611 | -1.91877 | 1.99896  |
| N | 2.66589  | 0.26399  | 0.41816  |
| H | 3.26721  | -1.48588 | -0.59560 |
| H | -3.78552 | 0.85337  | -0.38098 |
| H | -2.08332 | 1.36135  | -0.50957 |

There are no imaginary frequencies.

SCF energy: -473.107655 hartree  
 $\alpha\alpha/\beta\beta$ : -0.194254502 hartree  
 $\alpha\beta$ : -1.1109801 hartree  
SCS-MP2 energy: -474.5703342 hartree  
zero-point correction: +0.200747 hartree  
enthalpy correction: +0.211659 hartree  
free energy correction: +0.165643 hartree  
quasiharmonic free energy correction: +0.166067 hartree

**S-27**

|   |          |          |          |
|---|----------|----------|----------|
| C | 2.31296  | -0.09554 | 0.18891  |
| C | -0.09604 | -0.23432 | -0.64992 |
| C | 0.94491  | 1.88936  | -0.00724 |
| C | 2.16511  | 1.23384  | 0.39788  |
| C | 1.25705  | -0.88074 | -0.44414 |
| N | 1.51381  | -2.10717 | -0.76325 |
| N | -2.72021 | 0.72506  | -0.73995 |
| C | -2.52303 | -0.27347 | 0.04509  |
| C | -1.14616 | -0.80277 | 0.33009  |
| H | 0.69373  | -2.53036 | -1.22189 |
| H | -0.44013 | -0.42720 | -1.67257 |
| H | 3.23480  | -0.61160 | 0.44489  |
| H | -3.33648 | -0.78746 | 0.56780  |
| H | -1.16831 | -1.88473 | 0.13597  |
| H | -3.72196 | 0.93846  | -0.79500 |
| C | -0.78822 | -0.58400 | 1.80322  |
| H | 0.14777  | -1.08864 | 2.05706  |
| H | -0.69221 | 0.48105  | 2.03366  |

|   |          |          |          |
|---|----------|----------|----------|
| H | -1.57772 | -0.99742 | 2.43719  |
| N | -0.04227 | 1.22513  | -0.51316 |
| H | -0.92649 | 1.68669  | -0.77717 |
| H | 0.82324  | 2.96548  | 0.07758  |
| H | 2.94491  | 1.84045  | 0.84367  |

There are no imaginary frequencies.

SCF energy: -473.114570 hartree  
 $\alpha\alpha/\beta\beta$ : -0.193395507 hartree  
 $\alpha\beta$ : -1.1087983 hartree  
SCS-MP2 energy: -474.5740583 hartree  
zero-point correction: +0.200596 hartree  
enthalpy correction: +0.211687 hartree  
free energy correction: +0.165218 hartree  
quasiharmonic free energy correction: +0.165462 hartree

**S-28**

|   |          |          |          |
|---|----------|----------|----------|
| C | -0.30630 | -0.01897 | -0.89197 |
| C | 1.94302  | 0.53430  | 0.18680  |
| C | 1.34578  | -1.75365 | -0.16638 |
| C | 0.15273  | -1.42938 | -0.68726 |
| C | 0.76049  | 0.99062  | -0.54409 |
| N | 0.76576  | 2.24608  | -0.85128 |
| N | -0.26599 | 0.28277  | 1.86831  |
| C | -1.43284 | 0.36175  | 1.33842  |
| C | -1.62675 | 0.30839  | -0.14615 |
| H | 2.65640  | 1.24813  | 0.58754  |
| H | -2.34688 | 0.48358  | 1.93134  |
| H | -1.92026 | 1.31874  | -0.46990 |
| H | -0.07698 | 2.46694  | -1.40168 |
| C | -2.76615 | -0.64624 | -0.50891 |
| H | -2.89193 | -0.69720 | -1.59427 |
| H | -2.57928 | -1.65425 | -0.12910 |
| H | -3.70275 | -0.28815 | -0.07181 |
| N | 2.21505  | -0.72957 | 0.27424  |
| H | -0.33810 | 0.35118  | 2.89062  |
| H | -0.53353 | 0.09856  | -1.96228 |
| H | 3.08044  | -1.00883 | 0.74709  |
| H | -0.49562 | -2.23609 | -1.01482 |
| H | 1.72500  | -2.75836 | -0.03442 |

There are no imaginary frequencies.

SCF energy: -473.097839 hartree  
 $\alpha\alpha/\beta\beta$ : -0.193901387 hartree  
 $\alpha\beta$ : -1.1114166 hartree  
SCS-MP2 energy: -474.5608065 hartree  
zero-point correction: +0.200246 hartree  
enthalpy correction: +0.211380 hartree  
free energy correction: +0.164958 hartree  
quasiharmonic free energy correction: +0.165190 hartree

**2-methoxy-5-hydrazinylpyridine (12)**

**S-29**

|   |          |          |          |
|---|----------|----------|----------|
| C | 0.42460  | 0.82206  | 0.84885  |
| C | 1.09628  | -1.34163 | -0.00601 |
| C | 2.62689  | 0.36043  | 0.02879  |
| C | 1.70669  | 1.26639  | 0.59186  |
| C | 0.13737  | -0.51011 | 0.54065  |
| N | -1.21039 | -1.02242 | 0.76128  |
| N | -2.11476 | -0.55176 | -0.29892 |
| C | -3.05946 | 0.19077  | 0.16258  |
| C | -4.07581 | 0.74944  | -0.76701 |
| H | -1.55206 | -0.76370 | 1.70671  |
| H | 0.87272  | -2.37984 | -0.24506 |
| H | 2.01188  | 2.28532  | 0.80572  |
| H | -0.32996 | 1.47816  | 1.27663  |
| H | -3.16241 | 0.40950  | 1.23014  |
| H | -4.07981 | 1.83819  | -0.64164 |
| H | -1.20944 | -2.05492 | 0.70856  |
| H | -3.79152 | 0.52330  | -1.79774 |
| C | -5.46127 | 0.18464  | -0.44019 |
| H | -5.47839 | -0.89910 | -0.58113 |
| H | -5.74069 | 0.40419  | 0.59388  |
| H | -6.20985 | 0.63047  | -1.09960 |
| N | 2.34830  | -0.91137 | -0.26272 |
| O | 3.86654  | 0.85293  | -0.21681 |
| C | 4.82864  | -0.06779 | -0.77474 |
| H | 4.48626  | -0.44966 | -1.73769 |
| H | 5.73315  | 0.52454  | -0.90178 |
| H | 5.01211  | -0.89620 | -0.08874 |

There are no imaginary frequencies.

SCF energy: -586.995478 hartree  
 $\alpha\alpha/\beta\beta$ : -0.236958033 hartree  
 $\alpha\beta$ : -1.329402075 hartree  
SCS-MP2 energy: -588.7487325 hartree  
zero-point correction: +0.234563 hartree  
enthalpy correction: +0.248427 hartree  
free energy correction: +0.194545 hartree  
quasiharmonic free energy correction: +0.195921 hartree

**S-30**

|   |          |          |          |
|---|----------|----------|----------|
| C | 0.18827  | -0.62482 | 0.61272  |
| C | 1.21628  | 1.44070  | -0.07636 |
| C | 2.50705  | -0.44678 | 0.04662  |
| C | 1.41648  | -1.23792 | 0.44991  |
| C | 0.08748  | 0.74712  | 0.33819  |
| N | -1.14800 | 1.43554  | 0.56750  |
| N | -2.16192 | 0.90397  | -0.26658 |
| C | -3.24593 | 0.42405  | 0.23130  |
| C | -4.30505 | -0.17190 | -0.60412 |

|   |          |          |          |
|---|----------|----------|----------|
| H | -1.05253 | 2.42426  | 0.31086  |
| H | 1.16212  | 2.50527  | -0.29954 |
| H | 1.55682  | -2.29657 | 0.64414  |
| H | -0.67962 | -1.19065 | 0.94480  |
| H | -3.33912 | 0.47153  | 1.31386  |
| H | -4.03104 | -0.12267 | -1.66122 |
| H | -5.20499 | 0.43555  | -0.44902 |
| C | -4.57278 | -1.61389 | -0.15616 |
| H | -4.85853 | -1.64806 | 0.89788  |
| H | -5.38971 | -2.02760 | -0.75086 |
| H | -3.68645 | -2.23550 | -0.30179 |
| N | 2.42767  | 0.85753  | -0.21109 |
| O | 3.70240  | -1.09128 | -0.07902 |
| C | 4.82850  | -0.27609 | -0.45987 |
| H | 5.00270  | 0.51425  | 0.27253  |
| H | 5.67277  | -0.96386 | -0.48129 |
| H | 4.67585  | 0.16413  | -1.44692 |
| H | -1.99353 | 0.87799  | -1.28340 |

There are no imaginary frequencies.

SCF energy: -587.003720 hartree  
 $\alpha\alpha/\beta\beta$ : -0.23632319 hartree  
 $\alpha\beta$ : -1.323372571 hartree  
SCS-MP2 energy: -588.7493159 hartree  
zero-point correction: +0.233921 hartree  
enthalpy correction: +0.247986 hartree  
free energy correction: +0.193080 hartree  
quasiharmonic free energy correction: +0.195127 hartree

**S-31**

|   |          |          |          |
|---|----------|----------|----------|
| C | 1.10592  | 1.43678  | 0.03537  |
| C | 0.42876  | -0.86956 | 0.05665  |
| C | 2.75814  | -0.30401 | 0.01455  |
| C | 2.43716  | 1.05688  | 0.01171  |
| C | 0.07170  | 0.47892  | 0.05791  |
| N | -1.24103 | 0.88348  | 0.14963  |
| N | -2.22293 | -0.05620 | -0.09802 |
| C | -3.40569 | 0.41364  | -0.32077 |
| C | -4.55385 | -0.51206 | -0.53712 |
| H | -1.43789 | 1.85366  | -0.11056 |
| H | 0.85099  | 2.49426  | 0.03028  |
| H | -3.59669 | 1.49337  | -0.33031 |
| H | -4.17554 | -1.53756 | -0.58694 |
| H | -5.01812 | -0.28076 | -1.50339 |
| C | -5.59814 | -0.37752 | 0.57433  |
| H | -5.97493 | 0.64768  | 0.63603  |
| H | -6.44673 | -1.04079 | 0.38486  |
| H | -5.16465 | -0.64152 | 1.54293  |
| N | 1.74317  | -1.19083 | 0.03394  |
| H | 3.21807  | 1.80718  | -0.00959 |
| O | 3.97022  | -0.87962 | -0.00408 |
| C | 5.10971  | 0.01641  | -0.00823 |
| H | 5.09843  | 0.63608  | -0.90664 |

|   |          |          |          |
|---|----------|----------|----------|
| H | 5.10720  | 0.63277  | 0.89252  |
| H | 5.97536  | -0.64189 | -0.01385 |
| H | -0.27129 | -1.69354 | 0.06985  |
| H | 1.99723  | -2.18403 | 0.03220  |

There are no imaginary frequencies.

SCF energy: -587.000374 hartree  
 $\alpha\alpha/\beta\beta$ : -0.238013401 hartree  
 $\alpha\beta$ : -1.331968104 hartree  
SCS-MP2 energy: -588.7574113 hartree  
zero-point correction: +0.232875 hartree  
enthalpy correction: +0.247047 hartree  
free energy correction: +0.192685 hartree  
quasiharmonic free energy correction: +0.194218 hartree

**S-32**

|   |          |          |          |
|---|----------|----------|----------|
| C | 0.38884  | 1.67312  | -0.81510 |
| C | 0.26004  | 0.26369  | 1.14985  |
| C | 2.10710  | 0.12508  | -0.19777 |
| C | 1.62102  | 1.10901  | -1.08055 |
| C | -0.28254 | 1.23983  | 0.33218  |
| N | -1.61597 | 1.75210  | 0.61599  |
| N | -2.72512 | 1.07472  | -0.09737 |
| C | -2.74148 | -0.30896 | 0.24754  |
| C | -2.55303 | -1.28451 | -0.65218 |
| H | -1.83521 | 1.67764  | 1.62378  |
| H | -0.25748 | -0.07344 | 2.04608  |
| H | 2.20911  | 1.40086  | -1.94441 |
| H | -0.03841 | 2.43621  | -1.46212 |
| H | -2.48808 | 1.18641  | -1.09062 |
| H | -3.00551 | -0.50513 | 1.28469  |
| H | -2.28654 | -1.01337 | -1.67413 |
| H | -1.68769 | 2.75414  | 0.37332  |
| C | -2.72752 | -2.73563 | -0.34069 |
| H | -3.54445 | -3.16600 | -0.92968 |
| H | -2.94821 | -2.88857 | 0.71921  |
| H | -1.82011 | -3.29378 | -0.59330 |
| N | 1.46121  | -0.29310 | 0.89224  |
| O | 3.31774  | -0.40149 | -0.50955 |
| C | 3.82859  | -1.42032 | 0.37615  |
| H | 3.17390  | -2.29335 | 0.37838  |
| H | 4.80159  | -1.67992 | -0.03767 |
| H | 3.93830  | -1.03359 | 1.39031  |

There are no imaginary frequencies.

SCF energy: -586.976568 hartree  
 $\alpha\alpha/\beta\beta$ : -0.238074202 hartree  
 $\alpha\beta$ : -1.331132527 hartree  
SCS-MP2 energy: -588.7326432 hartree  
zero-point correction: +0.234316 hartree  
enthalpy correction: +0.248349 hartree  
free energy correction: +0.193701 hartree

quasiharmonic free energy correction: +0.195740 hartree

**S-33**

|   |          |          |          |
|---|----------|----------|----------|
| C | 0.19792  | -1.56001 | -0.88061 |
| C | 0.25111  | -0.34550 | 1.19654  |
| C | 2.05265  | -0.20736 | -0.20769 |
| C | 1.45071  | -1.04931 | -1.16087 |
| C | -0.41970 | -1.19392 | 0.32474  |
| N | -1.70734 | -1.73038 | 0.63949  |
| N | -2.75196 | -0.97327 | -0.09851 |
| C | -2.82050 | 0.44807  | 0.21366  |
| C | -2.26622 | 1.34101  | -0.60978 |
| H | -1.92393 | -1.54499 | 1.62677  |
| H | -0.20583 | -0.05043 | 2.14008  |
| H | 1.97914  | -1.29521 | -2.07650 |
| H | -0.30342 | -2.23187 | -1.57397 |
| H | -2.56807 | -1.12983 | -1.10212 |
| H | -3.28634 | 0.65960  | 1.17016  |
| H | -1.81130 | 0.99629  | -1.53826 |
| H | -3.64105 | -1.45075 | 0.11615  |
| C | -2.24606 | 2.80577  | -0.32623 |
| H | -2.74841 | 3.35519  | -1.12829 |
| H | -2.73663 | 3.03557  | 0.62255  |
| H | -1.21221 | 3.16337  | -0.28487 |
| N | 1.48799  | 0.13789  | 0.94947  |
| O | 3.29215  | 0.25871  | -0.52604 |
| C | 3.91238  | 1.14414  | 0.42778  |
| H | 4.04917  | 0.64749  | 1.38976  |
| H | 4.87879  | 1.38877  | -0.01059 |
| H | 3.31835  | 2.05017  | 0.55912  |

There are no imaginary frequencies.

SCF energy: -586.978911 hartree  
 $\alpha\alpha/\beta\beta$ : -0.238235296 hartree  
 $\alpha\beta$ : -1.33152506 hartree  
SCS-MP2 energy: -588.7355646 hartree  
zero-point correction: +0.234603 hartree  
enthalpy correction: +0.248641 hartree  
free energy correction: +0.193867 hartree  
quasiharmonic free energy correction: +0.196041 hartree

**S-34**

|   |          |          |          |
|---|----------|----------|----------|
| C | 0.61308  | -0.47057 | 1.38833  |
| C | 0.16769  | -0.80435 | -0.94524 |
| C | 2.29343  | 0.04938  | -0.24384 |
| C | 1.88529  | -0.00992 | 1.09233  |
| C | -0.27269 | -0.87614 | 0.37195  |
| N | -1.51706 | -1.41166 | 0.69630  |
| N | -2.46306 | -1.35743 | -0.35018 |
| C | -3.23614 | -0.17406 | -0.41693 |
| C | -2.93774 | 1.00335  | 0.15631  |

|   |          |          |          |
|---|----------|----------|----------|
| H | -1.88026 | -1.02183 | 1.57326  |
| H | 0.28864  | -0.51409 | 2.42583  |
| H | -3.04522 | -2.19264 | -0.31084 |
| H | -4.11074 | -0.28967 | -1.05489 |
| H | -2.05009 | 1.10629  | 0.77709  |
| C | -3.78285 | 2.22694  | -0.03445 |
| H | -3.21166 | 3.03622  | -0.50314 |
| H | -4.64822 | 2.01290  | -0.66878 |
| H | -4.15025 | 2.61002  | 0.92394  |
| N | 1.41900  | -0.34875 | -1.18890 |
| H | 2.55084  | 0.30345  | 1.88748  |
| O | 3.46824  | 0.45998  | -0.74294 |
| C | 4.44577  | 0.93978  | 0.21421  |
| H | 4.71469  | 0.14231  | 0.90874  |
| H | 5.30472  | 1.22183  | -0.39010 |
| H | 4.05357  | 1.80721  | 0.74772  |
| H | -0.42327 | -1.08604 | -1.80602 |
| H | 1.73408  | -0.29744 | -2.16331 |

There are no imaginary frequencies.

SCF energy: -586.982836 hartree  
 $\alpha\alpha/\beta\beta$ : -0.237984489 hartree  
 $\alpha\beta$ : -1.329266291 hartree  
SCS-MP2 energy: -588.7366119 hartree  
zero-point correction: +0.233773 hartree  
enthalpy correction: +0.247659 hartree  
free energy correction: +0.194050 hartree  
quasiharmonic free energy correction: +0.195593 hartree

**TS S-35**

|   |          |          |          |
|---|----------|----------|----------|
| C | 0.12586  | -1.91245 | -0.57728 |
| C | 0.16381  | -0.12406 | 1.07417  |
| C | -1.76264 | -0.51488 | -0.09484 |
| C | -1.18000 | -1.58060 | -0.83171 |
| C | 0.80155  | -1.20953 | 0.44954  |
| N | 2.15076  | -1.39735 | 0.65034  |
| N | 3.10560  | -0.15682 | -0.38472 |
| C | 2.51610  | 1.03065  | -0.07556 |
| C | 1.33790  | 1.46060  | -0.63603 |
| H | 0.64516  | 0.39172  | 1.90222  |
| H | -1.76821 | -2.09453 | -1.58507 |
| H | 0.62392  | -2.72070 | -1.10861 |
| H | 2.68487  | -0.51199 | -1.25735 |
| H | 2.95665  | 1.58147  | 0.75455  |
| H | 0.91766  | 0.87603  | -1.45741 |
| H | 2.52664  | -1.13000 | 1.56648  |
| C | 0.70257  | 2.77007  | -0.33573 |
| H | -0.36934 | 2.63217  | -0.15646 |
| H | 1.15749  | 3.24852  | 0.53507  |
| H | 0.79874  | 3.43931  | -1.19918 |
| H | 2.55398  | -2.27528 | 0.30160  |
| N | -1.13963 | 0.17562  | 0.85333  |
| O | -3.04983 | -0.24020 | -0.39714 |

C -3.65421 0.86947 0.30471  
H -3.11026 1.79287 0.09764  
H -4.66661 0.92591 -0.09123  
H -3.67479 0.68018 1.37867

quasiharmonic free energy correction: +0.195105 hartree

**TS 9**

1 imaginary frequency: -343.70 cm<sup>-1</sup>.

SCF energy: -586.930851 hartree  
 $\alpha/\beta$ : -0.245037419 hartree  
 $\alpha\beta$ : -1.349284632 hartree  
SCS-MP2 energy: -588.7133508 hartree  
zero-point correction: +0.232041 hartree  
enthalpy correction: +0.245423 hartree  
free energy correction: +0.193613 hartree  
quasiharmonic free energy correction: +0.194402 hartree

C 0.15195 -1.88535 -0.56901  
C 0.14457 -0.12324 1.09750  
C -1.75894 -0.51654 -0.09576  
C -1.14918 -1.56085 -0.84529  
C 0.82843 -1.19061 0.47421  
N 2.14400 -1.46467 0.71088  
N 3.03205 -0.19376 -0.36877  
C 2.51195 1.04903 -0.12038  
C 1.28592 1.38630 -0.62828  
H 0.61140 0.39407 1.93494  
H -1.72276 -2.06540 -1.61661  
H 0.66475 -2.68359 -1.10045  
H 2.79186 -0.63895 -1.26047  
H 3.00298 1.61791 0.66301  
H 0.86154 0.77120 -1.42269  
H 2.42327 -0.98702 1.58169  
C 0.62753 2.69068 -0.33849  
H -0.43626 2.53597 -0.13436  
H 1.09074 3.19199 0.51457  
H 0.69965 3.34309 -1.21577  
H 4.00303 -0.36676 -0.08846  
N -1.16300 0.16083 0.87665  
O -3.04248 -0.25232 -0.41791  
C -3.67628 0.83535 0.29261  
H -3.13837 1.76875 0.11749  
H -4.68005 0.88890 -0.12507  
H -3.71901 0.62294 1.36147

**TS S-36**

C 1.10898 0.23249 0.87616  
C -0.03874 -1.81974 -0.56509  
C -0.24064 -0.06708 1.10516  
C 1.77909 -0.48550 -0.10933  
C -0.79573 -1.18966 0.45282  
N -2.11385 -1.50292 0.61152  
N -3.15246 -0.20095 -0.43805  
C -2.57497 0.96690 -0.08417  
C -1.38093 1.42120 -0.61096  
H -0.77299 0.40460 1.92747  
H 1.57979 1.03570 1.42898  
H -0.47518 -2.63806 -1.13677  
H -2.69380 -0.54093 -1.29776  
H -3.02824 1.49632 0.75367  
H -0.95693 0.86820 -1.45205  
H -2.55479 -1.28413 1.50910  
C -0.78549 2.74520 -0.29712  
H 0.30278 2.66359 -0.20766  
H -1.19830 3.16889 0.62167  
H -0.98522 3.43714 -1.12547  
H -2.45369 -2.37522 0.19130  
N 1.21741 -1.49615 -0.82714  
O 3.07402 -0.29071 -0.46131  
C 3.77651 0.76762 0.22065  
H 3.81935 0.57155 1.29473  
H 4.78056 0.75760 -0.19928  
H 3.29830 1.73188 0.02947

1 imaginary frequency: -347.83 cm<sup>-1</sup>.

SCF energy: -586.931865 hartree  
 $\alpha/\beta$ : -0.245185255 hartree  
 $\alpha\beta$ : -1.350289396 hartree  
SCS-MP2 energy: -588.7156691 hartree  
zero-point correction: +0.231963 hartree  
enthalpy correction: +0.245355 hartree  
free energy correction: +0.193389 hartree  
quasiharmonic free energy correction: +0.194400 hartree

**TS S-37**

1 imaginary frequency: -243.26 cm<sup>-1</sup>.

SCF energy: -586.920304 hartree  
 $\alpha/\beta$ : -0.246145276 hartree  
 $\alpha\beta$ : -1.351913833 hartree  
SCS-MP2 energy: -588.7066975 hartree  
zero-point correction: +0.232372 hartree  
enthalpy correction: +0.245507 hartree  
free energy correction: +0.194444 hartree

C 1.13389 0.22526 0.89490  
C -0.05128 -1.80332 -0.53934  
C -0.21863 -0.06118 1.13050  
C 1.78112 -0.48648 -0.10599  
C -0.81532 -1.17514 0.48839  
N -2.09655 -1.58553 0.66127  
N -3.05960 -0.25303 -0.45256  
C -2.57873 0.97232 -0.13557  
C -1.33730 1.35950 -0.59461

|   |          |          |          |
|---|----------|----------|----------|
| H | -0.73792 | 0.42002  | 1.95754  |
| H | 1.62434  | 1.01527  | 1.45063  |
| H | -0.50180 | -2.62114 | -1.10074 |
| H | -2.74503 | -0.69134 | -1.32304 |
| H | -3.10473 | 1.50542  | 0.65062  |
| H | -0.88970 | 0.79111  | -1.41010 |
| H | -2.46150 | -1.14776 | 1.52108  |
| C | -0.74496 | 2.68918  | -0.27839 |
| H | 0.33864  | 2.60528  | -0.15714 |
| H | -1.18085 | 3.12115  | 0.62517  |
| H | -0.92735 | 3.36896  | -1.11873 |
| H | -4.02227 | -0.48646 | -0.19220 |
| N | 1.19820  | -1.48924 | -0.82406 |
| O | 3.07064  | -0.30269 | -0.48194 |
| C | 3.79489  | 0.75115  | 0.18353  |
| H | 3.86414  | 0.55266  | 1.25573  |
| H | 4.78764  | 0.73803  | -0.26238 |
| H | 3.31487  | 1.71714  | 0.00599  |

1 imaginary frequency:  $-262.08 \text{ cm}^{-1}$ .

SCF energy: -586.920586 hartree  
 $\alpha\alpha/\beta\beta$ : -0.246066751 hartree  
 $\alpha\beta$ : -1.353290118 hartree  
SCS-MP2 energy: -588.7085786 hartree  
zero-point correction: +0.232308 hartree  
enthalpy correction: +0.245457 hartree  
free energy correction: +0.194218 hartree  
quasiharmonic free energy correction: +0.195093 hartree

### TS S-38

|   |          |          |          |
|---|----------|----------|----------|
| C | -0.28650 | -1.77471 | -0.29964 |
| C | 0.46130  | 0.08992  | 1.04784  |
| C | -1.77538 | 0.04062  | 0.18799  |
| C | -1.51607 | -1.18246 | -0.46667 |
| C | 0.71387  | -1.20547 | 0.53181  |
| N | 1.93847  | -1.80264 | 0.57240  |
| N | 2.88066  | -0.85387 | -0.77207 |
| C | 2.74846  | 0.43781  | -0.38138 |
| C | 1.62371  | 1.21287  | -0.60923 |
| H | 1.06153  | 0.53507  | 1.83423  |
| H | -1.04542 | 1.46133  | 1.43099  |
| H | -2.27547 | -1.63995 | -1.08860 |
| H | -0.07616 | -2.72946 | -0.77655 |
| H | 2.16748  | -1.06962 | -1.48314 |
| H | 3.50305  | 0.79745  | 0.31996  |
| H | 0.89965  | 0.85747  | -1.34587 |
| H | 2.49750  | -1.38446 | 1.32912  |
| C | 1.55176  | 2.65539  | -0.22051 |
| H | 0.55067  | 2.92020  | 0.13410  |
| H | 2.27865  | 2.88880  | 0.56195  |
| H | 1.76219  | 3.28737  | -1.09085 |
| N | -0.82203 | 0.57798  | 0.96167  |
| O | -2.90554 | 0.74104  | 0.16756  |

|   |          |          |          |
|---|----------|----------|----------|
| C | -4.03964 | 0.15598  | -0.53067 |
| H | -4.28572 | -0.81041 | -0.08935 |
| H | -4.84813 | 0.86559  | -0.37426 |
| H | -3.81409 | 0.06226  | -1.59345 |

1 imaginary frequency:  $-363.36 \text{ cm}^{-1}$ .

SCF energy: -586.911492 hartree  
 $\alpha\alpha/\beta\beta$ : -0.246815652 hartree  
 $\alpha\beta$ : -1.353665743 hartree  
SCS-MP2 energy: -588.7004347 hartree  
zero-point correction: +0.232058 hartree  
enthalpy correction: +0.245351 hartree  
free energy correction: +0.193761 hartree  
quasiharmonic free energy correction: +0.194480 hartree

### TS S-39

|   |          |          |          |
|---|----------|----------|----------|
| C | 1.01478  | 0.35296  | 0.83351  |
| C | -0.08939 | -1.90118 | -0.38078 |
| C | -0.35632 | 0.05722  | 1.01378  |
| C | 1.75476  | -0.41776 | -0.03825 |
| C | -0.89435 | -1.18406 | 0.52604  |
| N | -2.16461 | -1.61898 | 0.68966  |
| N | -3.11063 | -0.29029 | -0.61265 |
| C | -2.60233 | 0.87723  | -0.20715 |
| C | -1.33143 | 1.34810  | -0.55815 |
| H | -0.88086 | 0.55699  | 1.82548  |
| H | 1.45930  | 1.21004  | 1.32457  |
| H | 1.74064  | -2.06526 | -1.25701 |
| H | -0.42498 | -2.80691 | -0.87584 |
| H | -2.51576 | -0.67747 | -1.35933 |
| H | -3.15832 | 1.40288  | 0.57111  |
| H | -0.82475 | 0.83869  | -1.38104 |
| H | -2.58778 | -1.10366 | 1.47404  |
| C | -0.87505 | 2.73417  | -0.23679 |
| H | 0.21456  | 2.78310  | -0.16633 |
| H | -1.31706 | 3.09396  | 0.69608  |
| H | -1.18095 | 3.40671  | -1.04720 |
| N | 1.16203  | -1.51202 | -0.61446 |
| O | 3.04207  | -0.29709 | -0.40563 |
| C | 3.74015  | 0.85420  | 0.12699  |
| H | 3.79654  | 0.78737  | 1.21516  |
| H | 4.73517  | 0.80092  | -0.30851 |
| H | 3.23519  | 1.77305  | -0.17912 |

1 imaginary frequency:  $-76.93 \text{ cm}^{-1}$ .

SCF energy: -586.895067 hartree  
 $\alpha\alpha/\beta\beta$ : -0.248378355 hartree  
 $\alpha\beta$ : -1.360679754 hartree  
SCS-MP2 energy: -588.6934683 hartree  
zero-point correction: +0.231522 hartree  
enthalpy correction: +0.244792 hartree  
free energy correction: +0.193345 hartree

quasi-harmonic free energy correction: +0.194051 hartree

**S-40**

|   |          |          |          |
|---|----------|----------|----------|
| C | -0.31709 | 2.07438  | 0.35809  |
| C | 0.43074  | -0.18017 | -0.58887 |
| C | -1.83258 | 0.21886  | -0.06636 |
| C | -1.56217 | 1.55788  | 0.45489  |
| C | 0.70864  | 1.25690  | -0.23662 |
| N | 1.88917  | 1.74912  | -0.45806 |
| N | 3.27831  | -0.62599 | -0.84564 |
| C | 2.63964  | -1.35461 | -0.00099 |
| C | 1.19012  | -1.16897 | 0.33822  |
| H | 0.80564  | -0.34069 | -1.60812 |
| H | -2.38032 | 2.11953  | 0.89590  |
| H | 4.25094  | -0.94151 | -0.92198 |
| H | 3.12021  | -2.18151 | 0.53264  |
| H | 0.71520  | -2.14077 | 0.14724  |
| C | 1.02418  | -0.84854 | 1.82692  |
| H | 1.44443  | -1.65871 | 2.42944  |
| H | 1.54121  | 0.07803  | 2.09370  |
| H | -0.03505 | -0.74966 | 2.08120  |
| N | -0.96836 | -0.58549 | -0.58259 |
| O | -3.14721 | -0.09308 | 0.01892  |
| C | -3.52171 | -1.39242 | -0.48850 |
| H | -4.59756 | -1.44991 | -0.33432 |
| H | -3.28137 | -1.47061 | -1.54998 |
| H | -3.01288 | -2.18083 | 0.06818  |
| H | 2.10711  | 2.71773  | -0.21479 |
| H | -0.07419 | 3.07858  | 0.69593  |
| H | 2.62189  | 1.12169  | -0.84308 |

There are no imaginary frequencies.

SCF energy: -587.016481 hartree  
 $\alpha\alpha/\beta\beta$ : -0.235987213 hartree  
 $\alpha\beta$ : -1.334754421 hartree  
SCS-MP2 energy: -588.7755111 hartree  
zero-point correction: +0.233791 hartree  
enthalpy correction: +0.247278 hartree  
free energy correction: +0.195532 hartree  
quasi-harmonic free energy correction: +0.196050 hartree

**S-41**

|   |          |          |          |
|---|----------|----------|----------|
| C | -0.62376 | -0.11874 | -0.50613 |
| C | 0.73982  | 1.70948  | 0.62973  |
| C | 1.79756  | -0.25822 | 0.00238  |
| C | 0.70757  | -0.79065 | -0.58838 |
| C | -0.47747 | 1.29699  | -0.06399 |
| N | -1.42255 | 2.16546  | -0.23748 |
| N | -3.44205 | 0.29715  | -0.61561 |
| C | -3.02205 | -0.50245 | 0.29928  |
| C | -1.57720 | -0.87258 | 0.48984  |

|   |          |          |          |
|---|----------|----------|----------|
| H | 0.77853  | -1.75096 | -1.08711 |
| H | -1.11418 | -0.13978 | -1.48847 |
| H | -4.46469 | 0.36481  | -0.57443 |
| H | -3.70603 | -1.00758 | 0.98944  |
| H | -1.29121 | -0.60452 | 1.51702  |
| C | -1.46366 | -2.39599 | 0.34461  |
| H | -2.21702 | -2.87809 | 0.97459  |
| H | -1.63459 | -2.69905 | -0.69272 |
| H | -0.48165 | -2.74966 | 0.66336  |
| N | 1.80768  | 0.97173  | 0.67120  |
| O | 2.98176  | -0.95255 | 0.03572  |
| C | 4.13250  | -0.17033 | -0.35706 |
| H | 4.33341  | 0.62355  | 0.36357  |
| H | 4.96535  | -0.87215 | -0.37855 |
| H | 3.97693  | 0.25657  | -1.35199 |
| H | -1.33313 | 3.12398  | 0.11040  |
| H | -2.29989 | 1.84850  | -0.68527 |
| H | 0.75260  | 2.67925  | 1.12603  |

There are no imaginary frequencies.

SCF energy: -586.981986 hartree  
 $\alpha\alpha/\beta\beta$ : -0.235948766 hartree  
 $\alpha\beta$ : -1.337566479 hartree  
SCS-MP2 energy: -588.744365 hartree  
zero-point correction: +0.232716 hartree  
enthalpy correction: +0.246440 hartree  
free energy correction: +0.193732 hartree  
quasi-harmonic free energy correction: +0.194460 hartree

**S-42**

|   |          |          |          |
|---|----------|----------|----------|
| C | 0.55932  | 2.33606  | 0.22330  |
| C | 0.79425  | -0.02805 | -0.68855 |
| C | -1.30631 | 0.80302  | 0.00181  |
| C | -0.74580 | 2.07892  | 0.44804  |
| C | 1.38855  | 1.35211  | -0.46257 |
| N | 2.59096  | 1.68049  | -0.81084 |
| N | -0.02083 | -2.81197 | -0.48655 |
| C | 1.09792  | -2.44718 | 0.03009  |
| C | 1.48131  | -1.03048 | 0.26985  |
| H | 3.03504  | 0.89029  | -1.30128 |
| H | 1.05215  | -0.33638 | -1.71066 |
| H | -1.40651 | 2.78906  | 0.93605  |
| H | 1.01356  | 3.28436  | 0.49993  |
| H | 1.78197  | -3.23447 | 0.33948  |
| H | 2.56045  | -0.97688 | 0.07749  |
| C | 1.24224  | -0.72632 | 1.75811  |
| H | 1.68803  | 0.23827  | 2.01112  |
| H | 0.17188  | -0.70202 | 1.97795  |
| H | 1.70816  | -1.49229 | 2.38454  |
| N | -0.65834 | -0.15548 | -0.56395 |
| O | -2.64204 | 0.72964  | 0.20920  |
| C | -3.27360 | -0.50644 | -0.19047 |
| H | -2.83312 | -1.34964 | 0.34500  |

H -4.32051 -0.38560 0.08199  
H -3.17437 -0.65526 -1.26705  
H -0.24225 -3.80256 -0.60526  
H -0.70794 -2.08512 -0.75125

quasiharmonic free energy correction: +0.196852 hartree

**S-44**

There are no imaginary frequencies.

SCF energy: -587.015259 hartree  
 $\alpha\alpha/\beta\beta$ : -0.235524481 hartree  
 $\alpha\beta$ : -1.334440916 hartree  
SCS-MP2 energy: -588.7736044 hartree  
zero-point correction: +0.233824 hartree  
enthalpy correction: +0.247658 hartree  
free energy correction: +0.194413 hartree  
quasiharmonic free energy correction: +0.195718 hartree

**S-43**

C -0.48106 -0.19148 -0.65756  
C 0.39090 1.91291 0.49184  
C 1.88367 0.22334 -0.02537  
C 0.97252 -0.56977 -0.62528  
C -0.69095 1.24766 -0.25287  
N -1.79129 1.85235 -0.55872  
N -3.44164 -0.41116 -0.62176  
C -2.72298 -1.30599 -0.04362  
C -1.26714 -1.19163 0.23407  
H 0.16243 2.87152 0.96182  
H 1.24307 -1.52311 -1.06611  
H -0.84871 -0.30414 -1.68719  
H -3.23422 -2.20924 0.28391  
H -0.86491 -2.19050 0.01830  
H -1.79950 2.81526 -0.19546  
C -1.08770 -0.93524 1.74047  
H -0.01892 -0.89855 1.96791  
H -1.55363 0.00930 2.03396  
H -1.53893 -1.74207 2.32408  
N 1.59684 1.45711 0.59819  
O 3.22694 -0.01057 0.08609  
C 3.68752 -1.24536 -0.48526  
H 3.48038 -1.27549 -1.55889  
H 4.76234 -1.26119 -0.31154  
H 3.21455 -2.09862 0.00948  
H -4.44201 -0.57113 -0.75660  
H -3.03362 0.50772 -0.89492

C 0.47269 2.33509 0.17210  
C 0.84209 -0.05017 -0.66188  
C -1.37166 0.77149 0.01537  
C -0.82824 2.06348 0.40110  
C 1.35122 1.36104 -0.47087  
N 2.54086 1.73597 -0.80893  
N 0.11730 -2.75811 -0.68259  
C 1.11098 -2.45067 0.07352  
C 1.52093 -1.02613 0.32009  
H 3.03469 0.95629 -1.26720  
H 1.07151 -0.37449 -1.68315  
H 0.89560 3.30531 0.41931  
H 1.70830 -3.20338 0.59890  
H 2.59740 -0.96157 0.10512  
H -0.00505 -3.77608 -0.71046  
C 1.30087 -0.66363 1.79186  
H 1.73376 0.31343 2.02218  
H 0.23493 -0.64738 2.03846  
H 1.78480 -1.40719 2.43168  
N -0.61834 -0.14568 -0.52732  
O -2.66145 0.62067 0.21850  
C -3.27595 -0.65173 -0.14435  
H -2.80990 -1.45727 0.42505  
H -4.31963 -0.53729 0.13383  
H -3.17708 -0.81126 -1.21930  
H -1.51257 2.77101 0.85618  
H -0.96150 -1.09332 -0.74828

There are no imaginary frequencies.

SCF energy: -587.013410 hartree  
 $\alpha\alpha/\beta\beta$ : -0.234846639 hartree  
 $\alpha\beta$ : -1.333613131 hartree  
SCS-MP2 energy: -588.7703102 hartree  
zero-point correction: +0.234264 hartree  
enthalpy correction: +0.247779 hartree  
free energy correction: +0.195862 hartree  
quasiharmonic free energy correction: +0.196363 hartree

**S-45**

There are no imaginary frequencies.

SCF energy: -586.994127 hartree  
 $\alpha\alpha/\beta\beta$ : -0.235704553 hartree  
 $\alpha\beta$ : -1.337106981 hartree  
SCS-MP2 energy: -588.7557917 hartree  
zero-point correction: +0.234390 hartree  
enthalpy correction: +0.247701 hartree  
free energy correction: +0.196323 hartree

C -0.67028 -0.50509 -0.94811  
C -0.36396 1.42052 0.55513  
C 1.56616 0.18261 -0.09050  
C 0.81249 -0.72105 -0.75385  
C -0.98079 0.94469 -0.73259  
N -1.64488 1.76899 -1.45534  
N -0.80232 0.48009 1.63909  
C -1.24555 -0.71793 1.45200  
C -1.47318 -1.30159 0.10558



|   |          |          |          |
|---|----------|----------|----------|
| H | -1.50497 | -1.28133 | 2.34656  |
| H | -1.09740 | -2.33149 | 0.13920  |
| H | -1.96033 | 1.28085  | -2.30525 |
| C | -2.98691 | -1.33834 | -0.16158 |
| H | -3.50585 | -1.90790 | 0.61418  |
| H | -3.40121 | -0.32709 | -0.19031 |
| H | -3.16178 | -1.82169 | -1.12605 |
| N | 1.06347  | 1.40532  | 0.39560  |
| H | -0.68959 | 0.81386  | 2.60318  |
| H | -0.98803 | -0.81607 | -1.95048 |
| H | 1.24510  | -1.63791 | -1.13551 |
| O | 2.90040  | 0.11238  | 0.18022  |
| C | 3.57650  | -1.06030 | -0.30879 |
| H | 3.50061  | -1.11865 | -1.39737 |
| H | 4.61597  | -0.93608 | -0.01034 |
| H | 3.15966  | -1.96170 | 0.14733  |
| H | -0.71037 | 2.41147  | 0.84585  |
| H | 1.57427  | 1.73274  | 1.21803  |

There are no imaginary frequencies.

SCF energy: -587.013421 hartree  
 $\alpha\alpha/\beta\beta$ : -0.236359282 hartree  
 $\alpha\beta$ : -1.332810981 hartree  
SCS-MP2 energy: -588.770367 hartree  
zero-point correction: +0.237176 hartree  
enthalpy correction: +0.249799 hartree  
free energy correction: +0.200021 hartree  
quasiharmonic free energy correction: +0.200293 hartree

### 2-chloro-5-hydrazinylpyridine (31)

#### S-46

|   |          |          |          |
|---|----------|----------|----------|
| C | 0.53370  | 0.46706  | 1.07868  |
| C | 0.97498  | -1.42446 | -0.36949 |
| C | 2.60548  | 0.14136  | -0.05768 |
| C | 1.82094  | 0.91122  | 0.80444  |
| C | 0.13147  | -0.72150 | 0.47897  |
| N | -1.22394 | -1.21720 | 0.69756  |
| N | -2.12863 | -0.67253 | -0.32921 |
| C | -2.91135 | 0.23198  | 0.14583  |
| C | -3.89526 | 0.89063  | -0.75275 |
| H | -1.54354 | -0.99596 | 1.66043  |
| H | 0.65828  | -2.35219 | -0.84081 |
| H | 2.20255  | 1.82598  | 1.24470  |
| H | -0.12736 | 1.02093  | 1.74096  |
| H | -2.89583 | 0.52580  | 1.19936  |
| H | -3.69435 | 1.96810  | -0.73362 |
| H | -1.25294 | -2.24526 | 0.59280  |
| H | -3.74967 | 0.53292  | -1.77531 |
| C | -5.32312 | 0.62027  | -0.27050 |
| H | -5.54240 | -0.45032 | -0.29261 |
| H | -5.46756 | 0.98264  | 0.75092  |
| H | -6.03770 | 1.13194  | -0.91968 |

|    |         |          |          |
|----|---------|----------|----------|
| N  | 2.22046 | -0.99484 | -0.63974 |
| Cl | 4.22084 | 0.67929  | -0.41603 |

There are no imaginary frequencies.

SCF energy: -932.000836 hartree  
 $\alpha\alpha/\beta\beta$ : -0.215991747 hartree  
 $\alpha\beta$ : -1.19843316 hartree  
SCS-MP2 energy: -933.5829503 hartree  
zero-point correction: +0.190747 hartree  
enthalpy correction: +0.203367 hartree  
free energy correction: +0.151109 hartree  
quasiharmonic free energy correction: +0.153150 hartree

#### S-47

|    |          |          |          |
|----|----------|----------|----------|
| C  | -0.23226 | -0.53929 | 0.23713  |
| C  | -1.24520 | 1.63557  | 0.00850  |
| C  | -2.58364 | -0.21257 | -0.00540 |
| C  | -1.50585 | -1.08644 | 0.13441  |
| C  | -0.10133 | 0.85053  | 0.16420  |
| N  | 1.15852  | 1.48563  | 0.34330  |
| N  | 2.18465  | 0.82324  | -0.35776 |
| C  | 3.23905  | 0.40608  | 0.25031  |
| C  | 4.32074  | -0.31512 | -0.44472 |
| H  | 1.13789  | 2.45620  | 0.01348  |
| H  | -1.16868 | 2.71952  | -0.05258 |
| H  | -1.65662 | -2.16017 | 0.17749  |
| H  | 0.63299  | -1.18425 | 0.36837  |
| H  | 3.28289  | 0.59775  | 1.32018  |
| H  | 5.24254  | 0.25258  | -0.27306 |
| H  | 4.13028  | -0.35404 | -1.52039 |
| C  | 4.46298  | -1.72294 | 0.15033  |
| H  | 3.55082  | -2.30303 | -0.00737 |
| H  | 5.29140  | -2.23536 | -0.34306 |
| H  | 4.67131  | -1.67698 | 1.22178  |
| N  | -2.48323 | 1.11463  | -0.06796 |
| Cl | -4.19550 | -0.87253 | -0.11339 |
| H  | 2.06204  | 0.66137  | -1.36887 |

There are no imaginary frequencies.

SCF energy: -932.012450 hartree  
 $\alpha\alpha/\beta\beta$ : -0.215407191 hartree  
 $\alpha\beta$ : -1.19186088 hartree  
SCS-MP2 energy: -933.5862879 hartree  
zero-point correction: +0.190972 hartree  
enthalpy correction: +0.203549 hartree  
free energy correction: +0.151626 hartree  
quasiharmonic free energy correction: +0.153429 hartree

#### S-48

|   |         |         |         |
|---|---------|---------|---------|
| C | 1.07658 | 1.66622 | 0.01349 |
|---|---------|---------|---------|

|    |          |          |          |
|----|----------|----------|----------|
| C  | 0.35340  | -0.63836 | -0.04728 |
| C  | 2.68245  | -0.11637 | 0.00697  |
| C  | 2.39437  | 1.24560  | 0.03044  |
| C  | 0.02158  | 0.72576  | -0.02753 |
| N  | -1.26740 | 1.14223  | -0.06860 |
| N  | -2.28977 | 0.22397  | -0.02942 |
| C  | -3.48136 | 0.72152  | 0.01439  |
| C  | -4.68609 | -0.15772 | 0.04772  |
| H  | -1.47562 | 2.14075  | 0.01058  |
| H  | 0.84597  | 2.72861  | 0.03457  |
| H  | -3.64107 | 1.80588  | 0.02791  |
| H  | -5.32576 | 0.12487  | -0.79890 |
| H  | -5.26270 | 0.10160  | 0.94542  |
| C  | -4.39539 | -1.65167 | 0.01688  |
| H  | -3.79379 | -1.95546 | 0.87704  |
| H  | -5.33276 | -2.21379 | 0.04132  |
| H  | -3.85461 | -1.93062 | -0.89083 |
| N  | 1.65564  | -0.98983 | -0.02912 |
| H  | 3.20610  | 1.96450  | 0.06251  |
| Cl | 4.27393  | -0.74881 | 0.02193  |
| H  | -0.36597 | -1.44575 | -0.07621 |
| H  | 1.86096  | -1.99529 | -0.04675 |

There are no imaginary frequencies.

SCF energy: -932.000118 hartree  
 $\alpha\alpha/\beta\beta$ : -0.217825269 hartree  
 $\alpha\beta$ : -1.20325254 hartree  
SCS-MP2 energy: -933.5892379 hartree  
zero-point correction: +0.189441 hartree  
enthalpy correction: +0.202369 hartree  
free energy correction: +0.150056 hartree  
quasiharmonic free energy correction: +0.151738 hartree

**S-49**

|    |          |          |          |
|----|----------|----------|----------|
| C  | -0.53173 | 1.50379  | 0.84189  |
| C  | -0.18253 | 0.30831  | -1.23536 |
| C  | -2.09081 | -0.06933 | -0.04027 |
| C  | -1.74489 | 0.83898  | 0.96362  |
| C  | 0.23870  | 1.22719  | -0.28290 |
| N  | 1.55170  | 1.84496  | -0.41674 |
| N  | 2.64857  | 1.15693  | 0.30007  |
| C  | 2.77039  | -0.18283 | -0.17487 |
| C  | 2.58632  | -1.24962 | 0.61580  |
| H  | 1.54048  | 2.81756  | -0.06616 |
| Cl | -3.59811 | -0.92781 | 0.09433  |
| H  | -2.39889 | 1.01686  | 1.81047  |
| H  | -0.20357 | 2.22101  | 1.59082  |
| H  | 2.34863  | 1.15863  | 1.28267  |
| H  | 3.11491  | -0.25977 | -1.20403 |
| H  | 2.23764  | -1.09283 | 1.63703  |
| H  | 1.83931  | 1.89613  | -1.40891 |
| C  | 2.87501  | -2.65213 | 0.18896  |
| H  | 1.99064  | -3.28339 | 0.32313  |

|   |          |          |          |
|---|----------|----------|----------|
| H | 3.17819  | -2.69228 | -0.86054 |
| H | 3.67549  | -3.08637 | 0.79740  |
| N | -1.35575 | -0.33976 | -1.11832 |
| H | 0.41064  | 0.09623  | -2.12177 |

There are no imaginary frequencies.

SCF energy: -931.982269 hartree  
 $\alpha\alpha/\beta\beta$ : -0.217078149 hartree  
 $\alpha\beta$ : -1.20000026 hartree  
SCS-MP2 energy: -933.5669881 hartree  
zero-point correction: +0.191456 hartree  
enthalpy correction: +0.203974 hartree  
free energy correction: +0.152414 hartree  
quasiharmonic free energy correction: +0.154043 hartree

**S-50**

|    |          |          |          |
|----|----------|----------|----------|
| C  | 0.30344  | -1.29279 | -0.98920 |
| C  | 0.21852  | -0.53267 | 1.29454  |
| C  | 2.05401  | -0.04199 | 0.03396  |
| C  | 1.54768  | -0.68547 | -1.09745 |
| C  | -0.37554 | -1.20734 | 0.22926  |
| N  | -1.64634 | -1.84366 | 0.37097  |
| N  | -2.68258 | -1.04006 | -0.31501 |
| C  | -2.82460 | 0.32824  | 0.17165  |
| C  | -2.31571 | 1.34423  | -0.52922 |
| H  | -1.93250 | -1.83292 | 1.35772  |
| H  | -0.28902 | -0.45646 | 2.25411  |
| H  | 2.11340  | -0.72157 | -2.02257 |
| H  | -0.13334 | -1.82491 | -1.83154 |
| H  | -2.45302 | -1.05868 | -1.32179 |
| H  | -3.31248 | 0.39447  | 1.13812  |
| H  | -1.83455 | 1.14257  | -1.48597 |
| H  | -3.56134 | -1.57071 | -0.20453 |
| C  | -2.37886 | 2.76149  | -0.06753 |
| H  | -2.89871 | 3.37810  | -0.80712 |
| H  | -2.89531 | 2.84686  | 0.89124  |
| H  | -1.36678 | 3.16505  | 0.03860  |
| N  | 1.43562  | 0.03697  | 1.21049  |
| Cl | 3.61430  | 0.73077  | -0.06750 |

There are no imaginary frequencies.

SCF energy: -931.987062 hartree  
 $\alpha\alpha/\beta\beta$ : -0.217156569 hartree  
 $\alpha\beta$ : -1.200118 hartree  
SCS-MP2 energy: -933.5719746 hartree  
zero-point correction: +0.191632 hartree  
enthalpy correction: +0.204130 hartree  
free energy correction: +0.152673 hartree  
quasiharmonic free energy correction: +0.154347 hartree

**S-51**

|    |          |          |          |
|----|----------|----------|----------|
| C  | -0.59395 | -0.78266 | 1.38423  |
| C  | -0.28014 | -0.47725 | -0.98477 |
| C  | -2.34920 | 0.13398  | 0.03169  |
| C  | -1.87512 | -0.26820 | 1.27634  |
| C  | 0.22847  | -0.90624 | 0.24564  |
| N  | 1.46578  | -1.50273 | 0.33793  |
| N  | 2.34702  | -1.25358 | -0.73053 |
| C  | 3.19752  | -0.13264 | -0.56507 |
| C  | 3.00445  | 0.89074  | 0.28182  |
| H  | 1.89612  | -1.41317 | 1.26449  |
| H  | -0.21685 | -1.09655 | 2.35469  |
| H  | 2.87192  | -2.10395 | -0.93060 |
| H  | 4.03230  | -0.14594 | -1.26364 |
| H  | 2.15459  | 0.89241  | 0.96138  |
| C  | 3.92661  | 2.07127  | 0.33545  |
| H  | 4.35634  | 2.19425  | 1.33561  |
| H  | 4.74987  | 1.95931  | -0.37638 |
| H  | 3.39739  | 3.00105  | 0.09852  |
| N  | -1.53414 | 0.01928  | -1.03578 |
| H  | -2.51273 | -0.17417 | 2.14879  |
| Cl | -3.91919 | 0.76801  | -0.22079 |
| H  | 0.26735  | -0.51035 | -1.91717 |
| H  | -1.87251 | 0.32611  | -1.95556 |

There are no imaginary frequencies.

SCF energy: -931.983287 hartree  
 $\alpha\alpha/\beta\beta$ : -0.217501529 hartree  
 $\alpha\beta$ : -1.19991461 hartree  
SCS-MP2 energy: -933.5681856 hartree  
zero-point correction: +0.190632 hartree  
enthalpy correction: +0.203159 hartree  
free energy correction: +0.151896 hartree  
quasiharmonic free energy correction: +0.153422 hartree

**S-52**

|   |          |          |          |
|---|----------|----------|----------|
| C | -0.13007 | -1.83848 | -0.54017 |
| C | 0.26721  | -0.08369 | 1.10235  |
| C | -1.77231 | -0.22311 | 0.08676  |
| C | -1.40240 | -1.33683 | -0.69640 |
| C | 0.70576  | -1.24387 | 0.42978  |
| N | 2.02719  | -1.60636 | 0.51916  |
| N | 3.01534  | -0.40298 | -0.58257 |
| C | 2.60030  | 0.81274  | -0.15530 |
| C | 1.42992  | 1.40820  | -0.57689 |
| H | 0.85591  | 0.34257  | 1.91096  |
| H | -2.09791 | -1.77353 | -1.40522 |
| H | 0.21601  | -2.69880 | -1.10906 |
| H | 2.45996  | -0.66723 | -1.41075 |
| H | 3.17503  | 1.26148  | 0.65394  |
| H | 0.87603  | 0.92948  | -1.38763 |
| H | 2.51531  | -1.40933 | 1.39926  |

|    |          |          |          |
|----|----------|----------|----------|
| C  | 1.01052  | 2.77530  | -0.17467 |
| H  | -0.06297 | 2.79531  | 0.03580  |
| H  | 1.56280  | 3.12512  | 0.70071  |
| H  | 1.18725  | 3.46883  | -1.00638 |
| H  | 2.29569  | -2.50709 | 0.10547  |
| N  | -1.00508 | 0.37945  | 0.97859  |
| Cl | -3.38229 | 0.40710  | -0.10272 |

1 imaginary frequency: -305.46 cm<sup>-1</sup>.

SCF energy: -931.932621 hartree  
 $\alpha\alpha/\beta\beta$ : -0.224487874 hartree  
 $\alpha\beta$ : -1.21859575 hartree  
SCS-MP2 energy: -933.5445945 hartree  
zero-point correction: +0.188941 hartree  
enthalpy correction: +0.200833 hartree  
free energy correction: +0.151838 hartree  
quasiharmonic free energy correction: +0.152636 hartree

**S-53**

|    |          |          |          |
|----|----------|----------|----------|
| C  | 0.98900  | 0.43121  | 0.98362  |
| C  | 0.21887  | -1.75767 | -0.50312 |
| C  | -0.33193 | -0.03520 | 1.12813  |
| C  | 1.80016  | -0.20649 | 0.06580  |
| C  | -0.68237 | -1.22414 | 0.44905  |
| N  | -1.96458 | -1.68963 | 0.50025  |
| N  | -3.01740 | -0.47548 | -0.63491 |
| C  | -2.64121 | 0.73498  | -0.17940 |
| C  | -1.47070 | 1.36939  | -0.56374 |
| H  | -0.96220 | 0.35064  | 1.92526  |
| H  | 1.33839  | 1.28884  | 1.54869  |
| H  | -0.06605 | -2.62694 | -1.09429 |
| H  | -2.42552 | -0.71994 | -1.44390 |
| H  | -3.24334 | 1.16077  | 0.62262  |
| H  | -0.89660 | 0.92021  | -1.37700 |
| H  | -2.50114 | -1.53050 | 1.35804  |
| C  | -1.12624 | 2.75759  | -0.16449 |
| H  | -0.05013 | 2.86096  | 0.00115  |
| H  | -1.66995 | 3.06732  | 0.73108  |
| H  | -1.38771 | 3.43579  | -0.98738 |
| H  | -2.16494 | -2.58927 | 0.04959  |
| N  | 1.44435  | -1.27798 | -0.67904 |
| Cl | 3.42700  | 0.35681  | -0.17253 |

1 imaginary frequency: -239.29 cm<sup>-1</sup>.

SCF energy: -931.928467 hartree  
 $\alpha\alpha/\beta\beta$ : -0.224961795 hartree  
 $\alpha\beta$ : -1.21977927 hartree  
SCS-MP2 energy: -933.5421766 hartree  
zero-point correction: +0.189404 hartree  
enthalpy correction: +0.201114 hartree  
free energy correction: +0.152710 hartree

quasi-harmonic free energy correction: +0.153264 hartree

**S-54**

|    |          |          |          |
|----|----------|----------|----------|
| C  | -0.10379 | -1.81350 | -0.53078 |
| C  | 0.24076  | -0.07003 | 1.12294  |
| C  | -1.77967 | -0.22645 | 0.08439  |
| C  | -1.37581 | -1.32395 | -0.70945 |
| C  | 0.72757  | -1.22331 | 0.45735  |
| N  | 2.01135  | -1.66606 | 0.58839  |
| N  | 2.93800  | -0.44493 | -0.55428 |
| C  | 2.60990  | 0.82782  | -0.20044 |
| C  | 1.38810  | 1.34295  | -0.56566 |
| H  | 0.81462  | 0.36488  | 1.93943  |
| H  | -2.05602 | -1.75833 | -1.43495 |
| H  | 0.26038  | -2.66722 | -1.09733 |
| H  | 2.54070  | -0.82532 | -1.42049 |
| H  | 3.24394  | 1.29063  | 0.54950  |
| H  | 0.82146  | 0.83784  | -1.34826 |
| H  | 2.41946  | -1.24285 | 1.43724  |
| C  | 0.95593  | 2.71399  | -0.17419 |
| H  | -0.11040 | 2.72165  | 0.06441  |
| H  | 1.52482  | 3.08368  | 0.68174  |
| H  | 1.10793  | 3.39261  | -1.02130 |
| H  | 3.89760  | -0.76117 | -0.37792 |
| N  | -1.03887 | 0.37500  | 0.99516  |
| Cl | -3.40093 | 0.37355  | -0.12247 |

1 imaginary frequency: -373.51 cm<sup>-1</sup>.

SCF energy: -931.930216 hartree  
 $\alpha\alpha/\beta\beta$ : -0.225138456 hartree  
 $\alpha\beta$ : -1.2218867 hartree  
SCS-MP2 energy: -933.5465723 hartree  
zero-point correction: +0.189293 hartree  
enthalpy correction: +0.201115 hartree  
free energy correction: +0.152380 hartree  
quasi-harmonic free energy correction: +0.153019 hartree

**S-55**

|   |          |          |          |
|---|----------|----------|----------|
| C | 1.02577  | 0.40913  | 1.01263  |
| C | 0.19381  | -1.73015 | -0.50511 |
| C | -0.29704 | -0.04202 | 1.16532  |
| C | 1.80981  | -0.21693 | 0.06320  |
| C | -0.70205 | -1.21052 | 0.47215  |
| N | -1.94443 | -1.75941 | 0.54410  |
| N | -2.94027 | -0.50358 | -0.59670 |
| C | -2.64786 | 0.75833  | -0.20739 |
| C | -1.43948 | 1.32375  | -0.56348 |
| H | -0.91768 | 0.35566  | 1.96616  |
| H | 1.40334  | 1.24589  | 1.59151  |
| H | -0.11417 | -2.58547 | -1.10426 |
| H | -2.51433 | -0.86681 | -1.45589 |

|    |          |          |          |
|----|----------|----------|----------|
| H  | -3.29524 | 1.18922  | 0.55028  |
| H  | -0.86017 | 0.85041  | -1.35620 |
| H  | -2.41100 | -1.39281 | 1.38838  |
| C  | -1.06854 | 2.70924  | -0.16292 |
| H  | 0.00532  | 2.78296  | 0.02503  |
| H  | -1.61988 | 3.03206  | 0.72273  |
| H  | -1.30183 | 3.38740  | -0.99217 |
| H  | -3.88258 | -0.86544 | -0.41804 |
| N  | 1.42005  | -1.26502 | -0.69925 |
| Cl | 3.44202  | 0.32694  | -0.19417 |

1 imaginary frequency: -317.28 cm<sup>-1</sup>.

SCF energy: -931.925784 hartree  
 $\alpha\alpha/\beta\beta$ : -0.22533628 hartree  
 $\alpha\beta$ : -1.22313144 hartree  
SCS-MP2 energy: -933.5437659 hartree  
zero-point correction: +0.188868 hartree  
enthalpy correction: +0.200723 hartree  
free energy correction: +0.151848 hartree  
quasi-harmonic free energy correction: +0.152609 hartree

**S-56**

|    |          |          |          |
|----|----------|----------|----------|
| C  | -0.10270 | -1.89153 | -0.38963 |
| C  | 0.37360  | 0.03181  | 1.01209  |
| C  | -1.78320 | -0.23968 | 0.03570  |
| C  | -1.37725 | -1.41246 | -0.61250 |
| C  | 0.78640  | -1.23198 | 0.49199  |
| N  | 2.06030  | -1.69534 | 0.59691  |
| N  | 2.95254  | -0.56273 | -0.68268 |
| C  | 2.62938  | 0.68172  | -0.26666 |
| C  | 1.42612  | 1.31258  | -0.55634 |
| H  | 0.87775  | 0.51026  | 1.84553  |
| H  | -1.26196 | 1.23702  | 1.34951  |
| H  | -2.07006 | -1.92050 | -1.27425 |
| H  | 0.22314  | -2.81651 | -0.85990 |
| H  | 2.30992  | -0.85250 | -1.43404 |
| H  | 3.28612  | 1.11636  | 0.48818  |
| H  | 0.80690  | 0.88073  | -1.34657 |
| H  | 2.52916  | -1.23309 | 1.38895  |
| C  | 1.14502  | 2.72786  | -0.16684 |
| H  | 0.08446  | 2.87348  | 0.05967  |
| H  | 1.74222  | 3.02717  | 0.69826  |
| H  | 1.38779  | 3.39124  | -1.00507 |
| N  | -0.94596 | 0.38769  | 0.86730  |
| Cl | -3.35105 | 0.41230  | -0.15694 |

1 imaginary frequency: -299.81 cm<sup>-1</sup>.

SCF energy: -931.904610 hartree  
 $\alpha\alpha/\beta\beta$ : -0.226948479 hartree  
 $\alpha\beta$ : -1.22605935 hartree  
SCS-MP2 energy: -933.5271802 hartree  
zero-point correction: +0.189022 hartree

enthalpy correction: +0.200736 hartree  
 free energy correction: +0.152414 hartree  
 quasiharmonic free energy correction: +0.152771 hartree

**S-57**

|    |          |          |          |
|----|----------|----------|----------|
| C  | 0.90202  | 0.56080  | 0.91921  |
| C  | 0.18760  | -1.80968 | -0.34435 |
| C  | -0.42636 | 0.08432  | 1.04040  |
| C  | 1.78275  | -0.09909 | 0.09853  |
| C  | -0.75475 | -1.21387 | 0.51645  |
| N  | -1.96545 | -1.81392 | 0.59315  |
| N  | -2.95977 | -0.62873 | -0.74053 |
| C  | -2.67530 | 0.59591  | -0.27990 |
| C  | -1.48208 | 1.28038  | -0.53716 |
| H  | -1.04258 | 0.49405  | 1.83764  |
| H  | 1.21771  | 1.46899  | 1.42235  |
| H  | 2.05470  | -1.74849 | -1.12385 |
| H  | 0.00220  | -2.74711 | -0.85916 |
| H  | -2.27268 | -0.89404 | -1.46210 |
| H  | -3.35447 | 0.99642  | 0.47448  |
| H  | -0.84942 | 0.89062  | -1.33766 |
| H  | -2.50178 | -1.38169 | 1.35906  |
| C  | -1.28780 | 2.71069  | -0.14992 |
| H  | -0.23008 | 2.94271  | -0.00533 |
| H  | -1.84177 | 2.95556  | 0.76001  |
| H  | -1.65628 | 3.34962  | -0.96146 |
| N  | 1.39107  | -1.26096 | -0.51113 |
| Cl | 3.39630  | 0.40834  | -0.18082 |

1 imaginary frequency: -106.05 cm<sup>-1</sup>.

SCF energy: -931.899516 hartree  
 $\alpha/\beta$ : -0.227116933 hartree  
 $\alpha\beta$ : -1.22878032 hartree  
 SCS-MP2 energy: -933.5254637 hartree  
 zero-point correction: +0.188882 hartree  
 enthalpy correction: +0.200640 hartree  
 free energy correction: +0.152179 hartree  
 quasiharmonic free energy correction: +0.152566 hartree

**S-58**

|   |          |          |          |
|---|----------|----------|----------|
| C | -0.50568 | 1.89738  | 0.49175  |
| C | 0.50563  | -0.16334 | -0.62895 |
| C | -1.80153 | -0.03485 | -0.18451 |
| C | -1.70027 | 1.26348  | 0.47131  |
| C | 0.62143  | 1.24893  | -0.12811 |
| N | 1.75024  | 1.87611  | -0.24423 |
| N | 3.37164  | -0.31000 | -0.81784 |
| C | 2.78891  | -1.18727 | -0.08186 |
| C | 1.32025  | -1.17378 | 0.22615  |
| H | 0.91784  | -0.19041 | -1.64572 |
| H | -2.58131 | 1.70657  | 0.92447  |

|    |          |          |          |
|----|----------|----------|----------|
| H  | 4.37239  | -0.51941 | -0.89543 |
| H  | 3.33343  | -2.01986 | 0.37564  |
| H  | 0.94145  | -2.16006 | -0.07287 |
| C  | 1.08856  | -1.01217 | 1.73189  |
| H  | 1.56045  | -1.83987 | 2.26852  |
| H  | 1.51842  | -0.07647 | 2.10103  |
| H  | 0.01875  | -1.02552 | 1.96020  |
| N  | -0.84687 | -0.70235 | -0.72004 |
| Cl | -3.40848 | -0.70779 | -0.25358 |
| H  | 1.85460  | 2.83299  | 0.10052  |
| H  | 2.55786  | 1.36817  | -0.65623 |
| H  | -0.37866 | 2.87978  | 0.93949  |

There are no imaginary frequencies.

SCF energy: -932.017564 hartree  
 $\alpha/\beta$ : -0.214634779 hartree  
 $\alpha\beta$ : -1.20402912 hartree  
 SCS-MP2 energy: -933.6054888 hartree  
 zero-point correction: +0.190619 hartree  
 enthalpy correction: +0.202735 hartree  
 free energy correction: +0.153600 hartree  
 quasiharmonic free energy correction: +0.153930 hartree

**S-59**

|    |          |          |          |
|----|----------|----------|----------|
| C  | -0.55080 | -0.18360 | -0.64690 |
| C  | 0.59238  | 1.79659  | 0.49408  |
| C  | 1.87097  | -0.01439 | -0.16539 |
| C  | 0.84796  | -0.70209 | -0.70618 |
| C  | -0.60035 | 1.20752  | -0.10716 |
| N  | -1.68783 | 1.90761  | -0.15065 |
| N  | -3.42366 | -0.15421 | -0.79668 |
| C  | -2.88656 | -1.10828 | -0.12418 |
| C  | -1.41834 | -1.19037 | 0.17423  |
| H  | 1.00142  | -1.67271 | -1.16930 |
| H  | -0.96438 | -0.16253 | -1.66664 |
| H  | -4.43501 | -0.30128 | -0.87916 |
| H  | -3.47436 | -1.93735 | 0.28371  |
| H  | -1.10008 | -2.18827 | -0.15711 |
| C  | -1.16890 | -1.09297 | 1.68281  |
| H  | -0.09900 | -1.17473 | 1.89647  |
| H  | -1.54161 | -0.14714 | 2.08698  |
| H  | -1.68325 | -1.90878 | 2.19841  |
| N  | 1.75915  | 1.22427  | 0.46978  |
| Cl | 3.49390  | -0.63005 | -0.20677 |
| H  | -1.71507 | 2.85929  | 0.22653  |
| H  | -2.53969 | 1.46045  | -0.55303 |
| H  | 0.50293  | 2.76579  | 0.98321  |

There are no imaginary frequencies.

SCF energy: -931.999838 hartree  
 $\alpha/\beta$ : -0.214691424 hartree  
 $\alpha\beta$ : -1.20526296 hartree

SCS-MP2 energy: -933.5892812 hartree  
 zero-point correction: +0.189576 hartree  
 enthalpy correction: +0.201806 hartree  
 free energy correction: +0.152132 hartree  
 quasiharmonic free energy correction: +0.152808 hartree

**S-60**

|    |          |          |          |
|----|----------|----------|----------|
| C  | 0.92248  | 2.08870  | 0.22244  |
| C  | -0.35671 | -0.06830 | 0.45337  |
| C  | 1.93638  | -0.09169 | 0.03634  |
| C  | 2.05679  | 1.35477  | 0.19866  |
| C  | -0.35913 | 1.39945  | 0.10205  |
| N  | -1.48302 | 1.94340  | -0.21712 |
| N  | -3.84846 | -0.14320 | -0.60721 |
| C  | -2.83244 | -0.10162 | 0.18543  |
| C  | -1.56392 | -0.80645 | -0.13411 |
| H  | -1.37735 | 2.95929  | -0.34618 |
| H  | -0.42383 | -0.12154 | 1.55394  |
| H  | 3.04141  | 1.80845  | 0.24963  |
| H  | 0.94498  | 3.17601  | 0.25805  |
| H  | -3.00155 | 0.30241  | 1.17955  |
| H  | -1.45654 | -0.86258 | -1.22361 |
| C  | -1.68420 | -2.22349 | 0.45098  |
| H  | -0.76338 | -2.77256 | 0.25057  |
| H  | -1.84381 | -2.18206 | 1.53262  |
| H  | -2.51992 | -2.75575 | -0.00997 |
| N  | 0.86816  | -0.79575 | 0.09836  |
| Cl | 3.43785  | -0.91831 | -0.32784 |
| H  | -4.74574 | 0.25652  | -0.33416 |
| H  | -3.77014 | -0.53627 | -1.54624 |

There are no imaginary frequencies.

SCF energy: -932.021051 hartree  
 $\alpha\alpha/\beta\beta$ : -0.213456711 hartree  
 $\alpha\beta$ : -1.20112577 hartree  
 SCS-MP2 energy: -933.6047064 hartree  
 zero-point correction: +0.190397 hartree  
 enthalpy correction: +0.202926 hartree  
 free energy correction: +0.152359 hartree  
 quasiharmonic free energy correction: +0.153383 hartree

**S-61**

|   |          |          |          |
|---|----------|----------|----------|
| C | -0.54539 | -0.15878 | -0.69984 |
| C | 0.57332  | 1.74299  | 0.59016  |
| C | 1.86385  | -0.01367 | -0.15044 |
| C | 0.86517  | -0.66529 | -0.76896 |
| C | -0.60097 | 1.24570  | -0.14593 |
| N | -1.65761 | 1.96722  | -0.32589 |
| N | -3.50541 | -0.12869 | -0.55090 |
| C | -2.84959 | -1.14297 | -0.11328 |
| C | -1.38130 | -1.18197 | 0.11727  |

|    |          |          |          |
|----|----------|----------|----------|
| H  | 0.46018  | 2.66888  | 1.15659  |
| H  | 1.04698  | -1.59384 | -1.30334 |
| H  | -0.95013 | -0.13474 | -1.72160 |
| H  | -3.42576 | -2.03440 | 0.12661  |
| H  | -1.07422 | -2.18167 | -0.21765 |
| H  | -1.56041 | 2.88620  | 0.12675  |
| C  | -1.13147 | -1.10066 | 1.63329  |
| H  | -0.05804 | -1.18495 | 1.82295  |
| H  | -1.49718 | -0.15426 | 2.04013  |
| H  | -1.63799 | -1.92078 | 2.14904  |
| N  | 1.73768  | 1.17214  | 0.59538  |
| Cl | 3.49762  | -0.60979 | -0.21090 |
| H  | -4.51932 | -0.18981 | -0.66468 |
| H  | -3.02797 | 0.77908  | -0.73328 |

There are no imaginary frequencies.

SCF energy: -932.006092 hartree  
 $\alpha\alpha/\beta\beta$ : -0.213937865 hartree  
 $\alpha\beta$ : -1.20434742 hartree  
 SCS-MP2 energy: -933.5939341 hartree  
 zero-point correction: +0.190707 hartree  
 enthalpy correction: +0.202915 hartree  
 free energy correction: +0.153127 hartree  
 quasiharmonic free energy correction: +0.153946 hartree

**S-62**

|    |          |          |          |
|----|----------|----------|----------|
| C  | -0.49168 | 2.23494  | 0.17375  |
| C  | 0.86130  | 0.24038  | -0.66478 |
| C  | -1.51078 | 0.06459  | -0.08319 |
| C  | -1.57905 | 1.44682  | 0.33392  |
| C  | 0.74123  | 1.72737  | -0.41911 |
| N  | 1.69179  | 2.56744  | -0.66538 |
| N  | 1.23727  | -2.54178 | -0.72211 |
| C  | 2.04058  | -1.88278 | 0.03498  |
| C  | 1.84436  | -0.42157 | 0.32548  |
| H  | 2.48902  | 2.08000  | -1.09964 |
| H  | 1.22180  | 0.06553  | -1.68531 |
| H  | -0.52126 | 3.28623  | 0.44818  |
| H  | 2.89730  | -2.34661 | 0.53387  |
| H  | 2.80810  | 0.07766  | 0.15096  |
| H  | 1.52467  | -3.52404 | -0.78562 |
| C  | 1.45223  | -0.22798 | 1.79386  |
| H  | 1.44827  | 0.83194  | 2.06108  |
| H  | 0.46366  | -0.65089 | 1.99709  |
| H  | 2.17698  | -0.73607 | 2.43616  |
| N  | -0.43453 | -0.45186 | -0.58141 |
| Cl | -2.89805 | -0.91452 | 0.04921  |
| H  | -2.50776 | 1.81408  | 0.75573  |
| H  | -0.34476 | -1.45815 | -0.83612 |

There are no imaginary frequencies.

SCF energy: -931.999493 hartree

$\alpha\alpha/\beta\beta$ : -0.214243095 hartree  
 $\alpha\beta$ : -1.20476436 hartree  
 SCS-MP2 energy: -933.588039 hartree  
 zero-point correction: +0.190294 hartree  
 enthalpy correction: +0.202455 hartree  
 free energy correction: +0.152941 hartree  
 quasiharmonic free energy correction: +0.153394 hartree

**S-63**

|    |          |          |          |
|----|----------|----------|----------|
| C  | -0.78814 | -0.25378 | -1.05046 |
| C  | -0.16194 | 1.19124  | 0.84432  |
| C  | 1.55167  | -0.04891 | -0.23406 |
| C  | 0.66412  | -0.66716 | -1.03431 |
| C  | -0.89924 | 1.12195  | -0.46618 |
| N  | -1.49619 | 2.16635  | -0.90729 |
| N  | -0.66067 | 0.06762  | 1.70205  |
| C  | -1.25500 | -0.99352 | 1.26792  |
| C  | -1.62188 | -1.19925 | -0.15624 |
| H  | -0.35598 | 2.11482  | 1.38854  |
| H  | -1.53475 | -1.73114 | 2.01741  |
| H  | -1.37546 | -2.23977 | -0.40066 |
| H  | -1.92134 | 1.94584  | -1.81869 |
| C  | -3.14016 | -1.00623 | -0.30363 |
| H  | -3.68306 | -1.68195 | 0.36272  |
| H  | -3.42639 | 0.02277  | -0.07078 |
| H  | -3.42344 | -1.23056 | -1.33489 |
| N  | 1.24803  | 1.05063  | 0.58352  |
| H  | -0.45180 | 0.13573  | 2.70520  |
| H  | -1.18756 | -0.27410 | -2.07091 |
| H  | 0.98116  | -1.48725 | -1.67019 |
| Cl | 3.22468  | -0.50337 | -0.19905 |
| H  | 1.82428  | 1.12465  | 1.42409  |

There are no imaginary frequencies.

SCF energy: -932.022699 hartree  
 $\alpha\alpha/\beta\beta$ : -0.214936135 hartree  
 $\alpha\beta$ : -1.20157843 hartree  
 SCS-MP2 energy: -933.6078839 hartree  
 zero-point correction: +0.194386 hartree  
 enthalpy correction: +0.205504 hartree  
 free energy correction: +0.158705 hartree  
 quasiharmonic free energy correction: +0.158800 hartree

**2-bromo-5-hydrazinylpyridine (29)**

**S-64**

|   |          |          |          |
|---|----------|----------|----------|
| C | 0.21292  | -0.31355 | 1.09112  |
| C | -0.23424 | 1.56723  | -0.37119 |
| C | -1.90259 | 0.07615  | 0.06376  |
| C | -1.10482 | -0.71118 | 0.89826  |
| C | 0.62667  | 0.84657  | 0.44488  |

|    |          |          |          |
|----|----------|----------|----------|
| N  | 2.00851  | 1.29622  | 0.58835  |
| N  | 2.86310  | 0.61594  | -0.39903 |
| C  | 3.64337  | -0.24860 | 0.14930  |
| C  | 4.57187  | -1.03859 | -0.70069 |
| H  | 2.34069  | 1.15137  | 1.56071  |
| H  | 0.09257  | 2.47253  | -0.87818 |
| H  | -1.49518 | -1.60173 | 1.37914  |
| H  | 0.88726  | -0.88058 | 1.72863  |
| H  | 3.66424  | -0.41960 | 1.23020  |
| H  | 4.32036  | -2.09738 | -0.56688 |
| H  | 2.07794  | 2.30796  | 0.38714  |
| H  | 4.41459  | -0.78051 | -1.75107 |
| C  | 6.02329  | -0.79375 | -0.28050 |
| H  | 6.29437  | 0.25560  | -0.42250 |
| H  | 6.17645  | -1.05190 | 0.77088  |
| H  | 6.69370  | -1.40845 | -0.88596 |
| N  | -1.50957 | 1.18348  | -0.56372 |
| Br | -3.71486 | -0.45493 | -0.22003 |

There are no imaginary frequencies.

SCF energy: -3042.406749 hartree  
 $\alpha\alpha/\beta\beta$ : -0.214254722 hartree  
 $\alpha\beta$ : -1.18483132 hartree  
 SCS-MP2 energy: -3043.971383 hartree  
 zero-point correction: +0.190463 hartree  
 enthalpy correction: +0.203226 hartree  
 free energy correction: +0.150186 hartree  
 quasiharmonic free energy correction: +0.152122 hartree

**S-65**

|    |          |          |          |
|----|----------|----------|----------|
| C  | -0.46485 | -0.37351 | -0.33270 |
| C  | 0.41534  | 1.84190  | 0.02497  |
| C  | 1.85762  | 0.07865  | -0.03354 |
| C  | 0.83772  | -0.85070 | -0.23982 |
| C  | -0.67769 | 1.00076  | -0.19083 |
| N  | -1.97534 | 1.56449  | -0.35775 |
| N  | -2.94765 | 0.83341  | 0.35494  |
| C  | -3.93989 | 0.27994  | -0.24887 |
| C  | -4.94567 | -0.53012 | 0.46273  |
| H  | -2.00744 | 2.53000  | -0.01350 |
| H  | 0.27371  | 2.91479  | 0.14121  |
| H  | 1.05118  | -1.90997 | -0.33804 |
| H  | -1.28896 | -1.06042 | -0.50938 |
| H  | -3.98930 | 0.42481  | -1.32575 |
| H  | -5.91975 | -0.06572 | 0.26978  |
| H  | -4.75946 | -0.51602 | 1.53960  |
| C  | -4.93552 | -1.96214 | -0.09027 |
| H  | -3.96833 | -2.43794 | 0.08790  |
| H  | -5.70956 | -2.54386 | 0.41437  |
| H  | -5.13971 | -1.96845 | -1.16353 |
| N  | 1.68249  | 1.39204  | 0.09577  |
| Br | 3.65949  | -0.55789 | 0.07898  |
| H  | -2.82363 | 0.72083  | 1.37241  |

There are no imaginary frequencies.

SCF energy: -3042.418290 hartree  
 $\alpha\alpha/\beta\beta$ : -0.213704996 hartree  
 $\alpha\beta$ : -1.17844415 hartree  
SCS-MP2 energy: -3043.974893 hartree  
zero-point correction: +0.190092 hartree  
enthalpy correction: +0.202999 hartree  
free energy correction: +0.148876 hartree  
quasiharmonic free energy correction: +0.151785 hartree

**S-66**

|    |          |          |          |
|----|----------|----------|----------|
| C  | 0.26722  | 1.82539  | -0.00316 |
| C  | -0.34005 | -0.51457 | -0.03898 |
| C  | 1.95986  | 0.12440  | -0.00338 |
| C  | 1.60481  | 1.47119  | 0.00888  |
| C  | -0.74051 | 0.83271  | -0.02605 |
| N  | -2.04862 | 1.17893  | -0.04785 |
| N  | -3.01749 | 0.20367  | -0.01827 |
| C  | -4.23592 | 0.63063  | 0.02636  |
| C  | -5.38516 | -0.32041 | 0.05621  |
| H  | -2.31146 | 2.16651  | 0.00596  |
| H  | -0.01616 | 2.87520  | 0.00843  |
| H  | -4.45812 | 1.70347  | 0.04556  |
| H  | -6.05266 | -0.06002 | -0.77570 |
| H  | -5.96303 | -0.11485 | 0.96714  |
| C  | -5.00565 | -1.79285 | -0.01049 |
| H  | -4.37531 | -2.07826 | 0.83521  |
| H  | -5.90774 | -2.41017 | 0.01308  |
| H  | -4.46164 | -2.01940 | -0.93080 |
| N  | 0.97760  | -0.80129 | -0.02704 |
| H  | 2.37555  | 2.23461  | 0.02896  |
| Br | 3.73820  | -0.47859 | 0.01400  |
| H  | -1.01786 | -1.35736 | -0.05704 |
| H  | 1.22356  | -1.79690 | -0.03512 |

There are no imaginary frequencies.

SCF energy: -3042.405515 hartree  
 $\alpha\alpha/\beta\beta$ : -0.216025344 hartree  
 $\alpha\beta$ : -1.18946842 hartree  
SCS-MP2 energy: -3043.976894 hartree  
zero-point correction: +0.189008 hartree  
enthalpy correction: +0.202197 hartree  
free energy correction: +0.148484 hartree  
quasiharmonic free energy correction: +0.150416 hartree

**S-67**

|   |          |          |          |
|---|----------|----------|----------|
| C | 0.21541  | -1.70418 | -0.78711 |
| C | 0.50391  | -0.37551 | 1.21974  |
| C | -1.46604 | -0.25410 | 0.07645  |

|    |          |          |          |
|----|----------|----------|----------|
| C  | -1.06305 | -1.17057 | -0.89858 |
| C  | 0.98633  | -1.29448 | 0.29591  |
| N  | 2.35772  | -1.77069 | 0.41400  |
| N  | 3.36615  | -0.98324 | -0.33148 |
| C  | 3.37402  | 0.36102  | 0.14595  |
| C  | 3.07118  | 1.40971  | -0.63186 |
| H  | 2.43994  | -2.74464 | 0.07716  |
| Br | -3.21389 | 0.50373  | -0.05716 |
| H  | -1.71849 | -1.45575 | -1.71452 |
| H  | 0.59539  | -2.42103 | -1.51189 |
| H  | 3.03923  | -1.01159 | -1.30524 |
| H  | 3.73613  | 0.46633  | 1.16654  |
| H  | 2.71222  | 1.22865  | -1.64544 |
| H  | 2.66718  | -1.77576 | 1.40111  |
| C  | 3.23653  | 2.82906  | -0.19518 |
| H  | 2.29080  | 3.37236  | -0.29043 |
| H  | 3.56994  | 2.88575  | 0.84440  |
| H  | 3.97041  | 3.34620  | -0.82246 |
| N  | -0.73300 | 0.14477  | 1.11378  |
| H  | 1.09748  | -0.06282 | 2.07543  |

There are no imaginary frequencies.

SCF energy: -3042.387916 hartree  
 $\alpha\alpha/\beta\beta$ : -0.215377769 hartree  
 $\alpha\beta$ : -1.18650334 hartree  
SCS-MP2 energy: -3043.955305 hartree  
zero-point correction: +0.190579 hartree  
enthalpy correction: +0.203381 hartree  
free energy correction: +0.150145 hartree  
quasiharmonic free energy correction: +0.152351 hartree

**S-68**

|   |          |          |          |
|---|----------|----------|----------|
| C | -0.43342 | -1.21933 | -1.08443 |
| C | -0.38931 | -0.79651 | 1.28719  |
| C | 1.44736  | -0.28597 | 0.04038  |
| C | 0.85599  | -0.70627 | -1.15329 |
| C | -1.06928 | -1.25676 | 0.15979  |
| N | -2.37556 | -1.82146 | 0.27127  |
| N | -3.37376 | -0.91567 | -0.32992 |
| C | -3.41337 | 0.42929  | 0.23504  |
| C | -2.94310 | 1.46216  | -0.46758 |
| H | -2.64690 | -1.87695 | 1.26038  |
| H | -0.86337 | -0.81720 | 2.26658  |
| H | 1.38956  | -0.65463 | -2.09643 |
| H | -0.93439 | -1.58662 | -1.97772 |
| H | -3.18172 | -0.88772 | -1.34447 |
| H | -3.81068 | 0.46230  | 1.24385  |
| H | -2.56004 | 1.29125  | -1.47330 |
| H | -4.28117 | -1.39608 | -0.22099 |
| C | -2.92824 | 2.85976  | 0.05457  |
| H | -3.52310 | 3.51123  | -0.59307 |
| H | -3.32738 | 2.91055  | 1.07017  |
| H | -1.90510 | 3.24839  | 0.05661  |



|    |         |          |          |
|----|---------|----------|----------|
| N  | 0.87175 | -0.32415 | 1.23925  |
| Br | 3.22936 | 0.40875  | -0.02531 |

There are no imaginary frequencies.

SCF energy: -3042.393237 hartree  
 $\alpha\alpha/\beta\beta$ : -0.215377435 hartree  
 $\alpha\beta$ : -1.18641675 hartree  
SCS-MP2 energy: -3043.960522 hartree  
zero-point correction: +0.191317 hartree  
enthalpy correction: +0.203999 hartree  
free energy correction: +0.151272 hartree  
quasiharmonic free energy correction: +0.153293 hartree

**S-69**

|    |          |          |          |
|----|----------|----------|----------|
| C  | 0.16059  | -0.98485 | 1.38694  |
| C  | 0.39729  | -0.59710 | -0.98099 |
| C  | -1.68003 | -0.14378 | 0.09941  |
| C  | -1.15314 | -0.54906 | 1.32222  |
| C  | 0.96582  | -1.01269 | 0.22924  |
| N  | 2.24731  | -1.50646 | 0.27838  |
| N  | 3.08400  | -1.14961 | -0.79487 |
| C  | 3.84441  | 0.03051  | -0.59933 |
| C  | 3.58774  | 0.99562  | 0.29771  |
| H  | 2.68594  | -1.42201 | 1.20148  |
| H  | 0.58020  | -1.30018 | 2.33955  |
| H  | 3.66941  | -1.94809 | -1.03691 |
| H  | 4.65688  | 0.11817  | -1.31831 |
| H  | 2.76043  | 0.89227  | 0.99693  |
| C  | 4.39978  | 2.25281  | 0.38378  |
| H  | 4.84766  | 2.36886  | 1.37678  |
| H  | 5.20666  | 2.25233  | -0.35514 |
| H  | 3.77919  | 3.13854  | 0.20815  |
| N  | -0.88752 | -0.18608 | -0.99133 |
| H  | -1.76999 | -0.52039 | 2.21408  |
| Br | -3.43762 | 0.48097  | -0.11655 |
| H  | 0.92108  | -0.57686 | -1.92723 |
| H  | -1.26205 | 0.10983  | -1.89913 |

There are no imaginary frequencies.

SCF energy: -3042.388491 hartree  
 $\alpha\alpha/\beta\beta$ : -0.215695744 hartree  
 $\alpha\beta$ : -1.18609736 hartree  
SCS-MP2 energy: -3043.955605 hartree  
zero-point correction: +0.189940 hartree  
enthalpy correction: +0.202694 hartree  
free energy correction: +0.150409 hartree  
quasiharmonic free energy correction: +0.151761 hartree

**TS S-70**

|   |         |          |          |
|---|---------|----------|----------|
| C | 0.58001 | -1.88205 | -0.54741 |
|---|---------|----------|----------|

|    |          |          |          |
|----|----------|----------|----------|
| C  | 0.87470  | -0.13203 | 1.12341  |
| C  | -1.15896 | -0.39341 | 0.12828  |
| C  | -0.72681 | -1.46613 | -0.68019 |
| C  | 1.38575  | -1.24432 | 0.42075  |
| N  | 2.73196  | -1.50508 | 0.48628  |
| N  | 3.61142  | -0.20575 | -0.60298 |
| C  | 3.09768  | 0.96617  | -0.16043 |
| C  | 1.87791  | 1.46009  | -0.57331 |
| H  | 1.44493  | 0.31891  | 1.93230  |
| H  | -1.39837 | -1.93909 | -1.38888 |
| H  | 0.97522  | -2.70697 | -1.13631 |
| H  | 3.07660  | -0.50548 | -1.43262 |
| H  | 3.63703  | 1.45500  | 0.64987  |
| H  | 1.36589  | 0.93513  | -1.38347 |
| H  | 3.21449  | -1.28600 | 1.36431  |
| C  | 1.33355  | 2.78023  | -0.16579 |
| H  | 0.25997  | 2.70158  | 0.02969  |
| H  | 1.84144  | 3.17227  | 0.71854  |
| H  | 1.45758  | 3.49308  | -0.99084 |
| H  | 3.06706  | -2.37368 | 0.05243  |
| N  | -0.42917 | 0.24238  | 1.02674  |
| Br | -2.96927 | 0.18523  | -0.05877 |

1 imaginary frequency: -295.13 cm<sup>-1</sup>.

SCF energy: -3042.338230 hartree  
 $\alpha\alpha/\beta\beta$ : -0.222840152 hartree  
 $\alpha\beta$ : -1.20518171 hartree  
SCS-MP2 energy: -3043.933008 hartree  
zero-point correction: +0.188170 hartree  
enthalpy correction: +0.200377 hartree  
free energy correction: +0.149617 hartree  
quasiharmonic free energy correction: +0.151013 hartree

**TS S-71**

|   |          |          |          |
|---|----------|----------|----------|
| C | 0.40193  | 0.31490  | 1.03690  |
| C | -0.46897 | -1.81092 | -0.48796 |
| C | -0.94793 | -0.07101 | 1.14899  |
| C | 1.18744  | -0.36229 | 0.12433  |
| C | -1.35596 | -1.22831 | 0.44861  |
| N | -2.66808 | -1.60656 | 0.46225  |
| N | -3.60305 | -0.31871 | -0.68169 |
| C | -3.15955 | 0.86151  | -0.20636 |
| C | -1.94318 | 1.42055  | -0.56242 |
| H | -1.57198 | 0.34800  | 1.93446  |
| H | 0.78929  | 1.14351  | 1.61999  |
| H | -0.79429 | -2.65814 | -1.09041 |
| H | -3.01045 | -0.59315 | -1.48063 |
| H | -3.74954 | 1.31872  | 0.58734  |
| H | -1.38311 | 0.93886  | -1.36706 |
| H | -3.21446 | -1.42036 | 1.30866  |
| C | -1.50924 | 2.77718  | -0.14212 |
| H | -0.42870 | 2.80479  | 0.02512  |
| H | -2.03296 | 3.10942  | 0.75728  |

|    |          |          |          |
|----|----------|----------|----------|
| H  | -1.72409 | 3.48316  | -0.95509 |
| H  | -2.91679 | -2.48712 | -0.00283 |
| N  | 0.78763  | -1.40484 | -0.63685 |
| Br | 3.00555  | 0.16896  | -0.10008 |

1 imaginary frequency:  $-243.97 \text{ cm}^{-1}$ .

SCF energy: -3042.334292 hartree  
 $\alpha/\beta$ : -0.223302651 hartree  
 $\alpha$ : -1.20632677 hartree  
SCS-MP2 energy: -3043.930753 hartree  
zero-point correction: +0.188592 hartree  
enthalpy correction: +0.200573 hartree  
free energy correction: +0.150782 hartree  
quasiharmonic free energy correction: +0.151570 hartree

### TS S-72

|    |          |          |          |
|----|----------|----------|----------|
| C  | 0.58990  | -1.85193 | -0.53602 |
| C  | 0.85066  | -0.11895 | 1.14486  |
| C  | -1.16857 | -0.38208 | 0.13140  |
| C  | -0.71405 | -1.44038 | -0.68798 |
| C  | 1.39852  | -1.22665 | 0.44909  |
| N  | 2.71062  | -1.58665 | 0.55039  |
| N  | 3.53517  | -0.28156 | -0.58213 |
| C  | 3.11982  | 0.95912  | -0.20777 |
| C  | 1.86041  | 1.38542  | -0.56048 |
| H  | 1.41005  | 0.33770  | 1.95971  |
| H  | -1.37583 | -1.90604 | -1.41114 |
| H  | 0.99724  | -2.67266 | -1.12190 |
| H  | 3.15692  | -0.67852 | -1.44939 |
| H  | 3.72608  | 1.45673  | 0.54285  |
| H  | 1.33245  | 0.84291  | -1.34563 |
| H  | 3.10468  | -1.15487 | 1.40176  |
| C  | 1.32145  | 2.71474  | -0.15909 |
| H  | 0.25601  | 2.63709  | 0.07074  |
| H  | 1.85402  | 3.12060  | 0.70375  |
| H  | 1.42544  | 3.41016  | -0.99992 |
| H  | 4.51643  | -0.53126 | -0.41817 |
| N  | -0.45662 | 0.24724  | 1.04477  |
| Br | -2.98504 | 0.17855  | -0.07051 |

1 imaginary frequency:  $-377.54 \text{ cm}^{-1}$ .

SCF energy: -3042.335550 hartree  
 $\alpha/\beta$ : -0.223525107 hartree  
 $\alpha$ : -1.20865108 hartree  
SCS-MP2 energy: -3043.934948 hartree  
zero-point correction: +0.188431 hartree  
enthalpy correction: +0.200593 hartree  
free energy correction: +0.150244 hartree  
quasiharmonic free energy correction: +0.151215 hartree

### TS S-73

|    |          |          |          |
|----|----------|----------|----------|
| C  | 0.43188  | 0.28880  | 1.07862  |
| C  | -0.48810 | -1.77129 | -0.50009 |
| C  | -0.91794 | -0.08810 | 1.19309  |
| C  | 1.19507  | -0.36217 | 0.12792  |
| C  | -1.37384 | -1.21770 | 0.46806  |
| N  | -2.64979 | -1.68918 | 0.50035  |
| N  | -3.53309 | -0.35894 | -0.64231 |
| C  | -3.16885 | 0.87790  | -0.23206 |
| C  | -1.91929 | 1.36566  | -0.55832 |
| H  | -1.53490 | 0.33359  | 1.98466  |
| H  | 0.84144  | 1.09154  | 1.68323  |
| H  | -0.83113 | -2.59720 | -1.12119 |
| H  | -3.11148 | -0.73848 | -1.49653 |
| H  | -3.80369 | 1.34267  | 0.51613  |
| H  | -1.35671 | 0.85999  | -1.34353 |
| H  | -3.11444 | -1.30903 | 1.33980  |
| C  | -1.46055 | 2.71884  | -0.13911 |
| H  | -0.38326 | 2.72140  | 0.04328  |
| H  | -1.98715 | 3.06379  | 0.75317  |
| H  | -1.65448 | 3.42152  | -0.95821 |
| H  | -4.50175 | -0.65902 | -0.49104 |
| N  | 0.76692  | -1.37167 | -0.66250 |
| Br | 3.01597  | 0.15818  | -0.11164 |

1 imaginary frequency:  $-324.66 \text{ cm}^{-1}$ .

SCF energy: -3042.331460 hartree  
 $\alpha/\beta$ : -0.223701809 hartree  
 $\alpha$ : -1.20978488 hartree  
SCS-MP2 energy: -3043.932336 hartree  
zero-point correction: +0.188295 hartree  
enthalpy correction: +0.200357 hartree  
free energy correction: +0.150405 hartree  
quasiharmonic free energy correction: +0.151162 hartree

### TS S-74

|   |          |          |          |
|---|----------|----------|----------|
| C | 0.58694  | -1.93814 | -0.38952 |
| C | 0.96734  | 0.00282  | 1.02020  |
| C | -1.18623 | -0.40126 | 0.08398  |
| C | -0.72084 | -1.53935 | -0.58445 |
| C | 1.44889  | -1.23120 | 0.48117  |
| N | 2.74770  | -1.61912 | 0.56589  |
| N | 3.55371  | -0.40171 | -0.71345 |
| C | 3.15060  | 0.80965  | -0.27603 |
| C | 1.90515  | 1.36229  | -0.55249 |
| H | 1.45443  | 0.50330  | 1.85110  |
| H | -0.72751 | 1.09688  | 1.40694  |
| H | -1.38872 | -2.08958 | -1.23830 |
| H | 0.96020  | -2.83796 | -0.87338 |
| H | 2.92214  | -0.72574 | -1.45991 |
| H | 3.78217  | 1.27887  | 0.47953  |
| H | 1.31057  | 0.89556  | -1.34223 |

|    |          |          |          |
|----|----------|----------|----------|
| H  | 3.19955  | -1.13516 | 1.35483  |
| C  | 1.53653  | 2.75408  | -0.15343 |
| H  | 0.46650  | 2.83646  | 0.05986  |
| H  | 2.10564  | 3.08037  | 0.72074  |
| H  | 1.75096  | 3.43663  | -0.98408 |
| N  | -0.37507 | 0.27429  | 0.90517  |
| Br | -2.95573 | 0.19922  | -0.08729 |

1 imaginary frequency:  $-275.14 \text{ cm}^{-1}$ .

SCF energy: -3042.308813 hartree  
 $\alpha\alpha/\beta\beta$ : -0.225247944 hartree  
 $\alpha\beta$ : -1.21260379 hartree  
SCS-MP2 energy: -3043.914103 hartree  
zero-point correction: +0.188491 hartree  
enthalpy correction: +0.200470 hartree  
free energy correction: +0.150707 hartree  
quasiharmonic free energy correction: +0.151402 hartree

**TS S-75**

|    |          |          |          |
|----|----------|----------|----------|
| C  | 0.33130  | 0.44632  | 0.96834  |
| C  | -0.50072 | -1.86648 | -0.33249 |
| C  | -1.02501 | 0.05071  | 1.05902  |
| C  | 1.18648  | -0.26195 | 0.15981  |
| C  | -1.42310 | -1.21620 | 0.50955  |
| N  | -2.67425 | -1.73333 | 0.54689  |
| N  | -3.55190 | -0.48018 | -0.77957 |
| C  | -3.20354 | 0.72250  | -0.30126 |
| C  | -1.97028 | 1.33715  | -0.53725 |
| H  | -1.63195 | 0.49128  | 1.84671  |
| H  | 0.68561  | 1.33068  | 1.48831  |
| H  | 1.37959  | -1.92501 | -1.07042 |
| H  | -0.73448 | -2.78603 | -0.86005 |
| H  | -2.87431 | -0.77562 | -1.49798 |
| H  | -3.86869 | 1.15372  | 0.44851  |
| H  | -1.34656 | 0.91190  | -1.32700 |
| H  | -3.19821 | -1.28061 | 1.30927  |
| C  | -1.69133 | 2.74812  | -0.13328 |
| H  | -0.62403 | 2.90775  | 0.03895  |
| H  | -2.25015 | 3.02351  | 0.76486  |
| H  | -1.99402 | 3.41625  | -0.94849 |
| N  | 0.73995  | -1.39467 | -0.46797 |
| Br | 2.98965  | 0.20081  | -0.10408 |

1 imaginary frequency:  $-95.35 \text{ cm}^{-1}$ .

SCF energy: -3042.305746 hartree  
 $\alpha\alpha/\beta\beta$ : -0.225260596 hartree  
 $\alpha\beta$ : -1.21452832 hartree  
SCS-MP2 energy: -3043.913354 hartree  
zero-point correction: +0.188533 hartree  
enthalpy correction: +0.200402 hartree  
free energy correction: +0.151117 hartree

quasiharmonic free energy correction: +0.151488 hartree

**S-76**

|    |          |          |          |
|----|----------|----------|----------|
| C  | 0.26540  | 2.03285  | 0.47036  |
| C  | 1.06623  | -0.13970 | -0.61243 |
| C  | -1.20736 | 0.20370  | -0.12019 |
| C  | -0.98025 | 1.50481  | 0.49819  |
| C  | 1.31908  | 1.26753  | -0.14832 |
| N  | 2.50059  | 1.78101  | -0.29585 |
| N  | 3.90130  | -0.54786 | -0.85453 |
| C  | 3.25816  | -1.35555 | -0.08970 |
| C  | 1.80457  | -1.20087 | 0.25055  |
| H  | 1.45011  | -0.22591 | -1.63682 |
| H  | -1.80637 | 2.03816  | 0.95752  |
| H  | 4.87703  | -0.84792 | -0.95090 |
| H  | 3.73464  | -2.22708 | 0.37095  |
| H  | 1.33219  | -2.15570 | -0.01470 |
| C  | 1.62475  | -0.98499 | 1.75681  |
| H  | 2.03695  | -1.83879 | 2.30164  |
| H  | 2.14472  | -0.08247 | 2.09137  |
| H  | 0.56397  | -0.89974 | 2.01030  |
| N  | -0.33347 | -0.55772 | -0.66412 |
| Br | -3.03299 | -0.38244 | -0.13327 |
| H  | 2.70200  | 2.73162  | 0.02357  |
| H  | 3.24908  | 1.18637  | -0.70625 |
| H  | 0.48792  | 3.01216  | 0.88744  |

There are no imaginary frequencies.

SCF energy: -3042.422815 hartree  
 $\alpha\alpha/\beta\beta$ : -0.212953594 hartree  
 $\alpha\beta$ : -1.19066621 hartree  
SCS-MP2 energy: -3043.993584 hartree  
zero-point correction: +0.189957 hartree  
enthalpy correction: +0.202412 hartree  
free energy correction: +0.151654 hartree  
quasiharmonic free energy correction: +0.152209 hartree

**S-77**

|   |          |          |          |
|---|----------|----------|----------|
| C | -1.12200 | -0.16463 | -0.62813 |
| C | -0.15093 | 1.92655  | 0.47656  |
| C | 1.26997  | 0.20174  | -0.10805 |
| C | 0.31365  | -0.57852 | -0.64646 |
| C | -1.28670 | 1.22928  | -0.11904 |
| N | -2.42636 | 1.83827  | -0.18658 |
| N | -3.98862 | -0.35135 | -0.83233 |
| C | -3.39337 | -1.25855 | -0.14414 |
| C | -1.93133 | -1.21988 | 0.19188  |
| H | 0.54460  | -1.54705 | -1.08094 |
| H | -1.50938 | -0.19153 | -1.65837 |
| H | -4.98256 | -0.57845 | -0.94027 |
| H | -3.92304 | -2.13197 | 0.25049  |

|    |          |          |          |
|----|----------|----------|----------|
| H  | -1.52843 | -2.19645 | -0.10946 |
| C  | -1.73076 | -1.07264 | 1.70412  |
| H  | -0.66383 | -1.06642 | 1.94641  |
| H  | -2.18653 | -0.15029 | 2.07583  |
| H  | -2.19508 | -1.91468 | 2.22494  |
| N  | 1.05726  | 1.44527  | 0.48791  |
| Br | 3.09223  | -0.34677 | -0.11046 |
| H  | -2.53380 | 2.79362  | 0.16591  |
| H  | -3.23546 | 1.31427  | -0.58648 |
| H  | -0.32169 | 2.90030  | 0.93468  |

There are no imaginary frequencies.

SCF energy: -3042.406199 hartree  
 $\alpha\alpha/\beta\beta$ : -0.212972145 hartree  
 $\alpha\beta$ : -1.19160844 hartree  
SCS-MP2 energy: -3043.978111 hartree  
zero-point correction: +0.188852 hartree  
enthalpy correction: +0.201400 hartree  
free energy correction: +0.150084 hartree  
quasiharmonic free energy correction: +0.151047 hartree

#### S-78

|    |          |          |          |
|----|----------|----------|----------|
| C  | 0.08394  | 2.28892  | 0.24290  |
| C  | -0.96153 | 0.01181  | 0.51116  |
| C  | 1.32961  | 0.22963  | 0.13759  |
| C  | 1.29360  | 1.68500  | 0.25503  |
| C  | -1.11294 | 1.46131  | 0.11834  |
| N  | -2.28053 | 1.87105  | -0.24094 |
| N  | -4.35244 | -0.47440 | -0.75280 |
| C  | -3.40780 | -0.30145 | 0.10825  |
| C  | -2.05273 | -0.87661 | -0.09511 |
| H  | -2.28511 | 2.88842  | -0.39858 |
| H  | -1.05343 | -0.02298 | 1.61049  |
| H  | 2.22038  | 2.24745  | 0.30660  |
| H  | -0.01193 | 3.37273  | 0.25036  |
| H  | -3.69104 | 0.10076  | 1.07637  |
| H  | -1.86799 | -0.98072 | -1.17076 |
| C  | -2.06138 | -2.26407 | 0.56882  |
| H  | -1.06991 | -2.70990 | 0.47912  |
| H  | -2.31625 | -2.18173 | 1.62958  |
| H  | -2.78870 | -2.91645 | 0.07933  |
| N  | 0.34721  | -0.58618 | 0.20665  |
| Br | 3.07622  | -0.50939 | -0.20592 |
| H  | -5.30646 | -0.17374 | -0.55555 |
| H  | -4.16169 | -0.87558 | -1.67202 |

There are no imaginary frequencies.

SCF energy: -3042.426476 hartree  
 $\alpha\alpha/\beta\beta$ : -0.211796062 hartree  
 $\alpha\beta$ : -1.187765 hartree  
SCS-MP2 energy: -3043.992991 hartree  
zero-point correction: +0.189619 hartree

enthalpy correction: +0.202438 hartree  
free energy correction: +0.150314 hartree  
quasiharmonic free energy correction: +0.151723 hartree

#### S-79

|    |          |          |          |
|----|----------|----------|----------|
| C  | -1.12002 | -0.13967 | -0.69034 |
| C  | -0.17878 | 1.85216  | 0.60553  |
| C  | 1.25624  | 0.19536  | -0.08900 |
| C  | 0.32703  | -0.53851 | -0.72487 |
| C  | -1.29100 | 1.26513  | -0.16105 |
| N  | -2.38904 | 1.90670  | -0.38871 |
| N  | -4.07591 | -0.32621 | -0.58470 |
| C  | -3.35510 | -1.27842 | -0.11124 |
| C  | -1.88966 | -1.20925 | 0.13171  |
| H  | -0.37665 | 2.76877  | 1.16402  |
| H  | 0.58790  | -1.45451 | -1.24788 |
| H  | -1.50472 | -0.16255 | -1.71962 |
| H  | -3.86954 | -2.20071 | 0.15154  |
| H  | -1.50933 | -2.18938 | -0.18586 |
| H  | -2.37596 | 2.83677  | 0.05189  |
| C  | -1.65983 | -1.08818 | 1.64837  |
| H  | -0.58467 | -1.09051 | 1.84834  |
| H  | -2.09778 | -0.16522 | 2.03733  |
| H  | -2.10990 | -1.93536 | 2.17262  |
| N  | 1.02577  | 1.37064  | 0.64624  |
| Br | 3.08934  | -0.33039 | -0.11843 |
| H  | -5.08229 | -0.46092 | -0.70204 |
| H  | -3.66314 | 0.60774  | -0.78979 |

There are no imaginary frequencies.

SCF energy: -3042.411994 hartree  
 $\alpha\alpha/\beta\beta$ : -0.212287682 hartree  
 $\alpha\beta$ : -1.19095983 hartree  
SCS-MP2 energy: -3043.982671 hartree  
zero-point correction: +0.189944 hartree  
enthalpy correction: +0.202400 hartree  
free energy correction: +0.151359 hartree  
quasiharmonic free energy correction: +0.152279 hartree

#### S-80

|   |          |          |          |
|---|----------|----------|----------|
| C | -0.55175 | -2.35241 | 0.16995  |
| C | -1.42121 | -0.09958 | -0.66127 |
| C | 0.93119  | -0.47392 | -0.09946 |
| C | 0.69127  | -1.83647 | 0.31464  |
| C | -1.64444 | -1.57269 | -0.40284 |
| N | -2.76645 | -2.17240 | -0.63176 |
| N | -1.09278 | 2.69521  | -0.70403 |
| C | -2.07310 | 2.25107  | -0.00038 |
| C | -2.22498 | 0.78852  | 0.31363  |
| H | -3.43883 | -1.51522 | -1.05411 |
| H | -1.72921 | 0.14153  | -1.68568 |

|    |          |          |          |
|----|----------|----------|----------|
| H  | -0.75995 | -3.38351 | 0.44442  |
| H  | -2.83102 | 2.90837  | 0.43652  |
| H  | -3.27690 | 0.52108  | 0.14317  |
| H  | -1.13929 | 3.71501  | -0.79742 |
| C  | -1.89247 | 0.53417  | 1.78721  |
| H  | -2.10663 | -0.50247 | 2.06065  |
| H  | -0.84180 | 0.75077  | 2.00214  |
| H  | -2.50624 | 1.18405  | 2.41735  |
| N  | -0.00047 | 0.28105  | -0.58155 |
| Br | 2.66078  | 0.23548  | 0.02941  |
| H  | 1.51420  | -2.41327 | 0.72185  |
| H  | 0.11919  | 1.29272  | -0.82576 |

There are no imaginary frequencies.

SCF energy: -3042.403175 hartree  
 $\alpha\alpha/\beta\beta$ : -0.212536753 hartree  
 $\alpha\beta$ : -1.19115832 hartree  
SCS-MP2 energy: -3043.974256 hartree  
zero-point correction: +0.189627 hartree  
enthalpy correction: +0.202033 hartree  
free energy correction: +0.151096 hartree  
quasiharmonic free energy correction: +0.151872 hartree

### S-81

|    |          |          |          |
|----|----------|----------|----------|
| C  | -1.30221 | -0.30918 | -1.03253 |
| C  | -0.82063 | 1.27663  | 0.79155  |
| C  | 0.99711  | 0.10763  | -0.18805 |
| C  | 0.17547  | -0.61856 | -0.96761 |
| C  | -1.52416 | 1.08323  | -0.52524 |
| N  | -2.19196 | 2.05270  | -1.03125 |
| N  | -1.25639 | 0.16611  | 1.69955  |
| C  | -1.77381 | -0.95238 | 1.31366  |
| C  | -2.08670 | -1.26367 | -0.10404 |
| H  | -1.09233 | 2.21018  | 1.28307  |
| H  | -2.02509 | -1.66416 | 2.09751  |
| H  | -1.75597 | -2.29468 | -0.28091 |
| H  | -2.58171 | 1.74902  | -1.93467 |
| C  | -3.61041 | -1.19712 | -0.29838 |
| H  | -4.11699 | -1.88829 | 0.38043  |
| H  | -3.98339 | -0.18620 | -0.11440 |
| H  | -3.84479 | -1.48163 | -1.32708 |
| N  | 0.60235  | 1.22607  | 0.56117  |
| H  | -1.07873 | 0.30359  | 2.70166  |
| H  | -1.67524 | -0.41132 | -2.05810 |
| H  | 0.55873  | -1.44933 | -1.55089 |
| Br | 2.85807  | -0.26158 | -0.08973 |
| H  | 1.15699  | 1.39434  | 1.40171  |

There are no imaginary frequencies.

SCF energy: -3042.429096 hartree  
 $\alpha\alpha/\beta\beta$ : -0.213216957 hartree  
 $\alpha\beta$ : -1.18795741 hartree

SCS-MP2 energy: -3043.99679 hartree  
zero-point correction: +0.193313 hartree  
enthalpy correction: +0.204856 hartree  
free energy correction: +0.156176 hartree  
quasiharmonic free energy correction: +0.156567 hartree

### 3-hydrazinyl-4-methoxypyridine (33)

#### S-82

|   |          |          |          |
|---|----------|----------|----------|
| C | 0.98179  | 0.60678  | -0.26164 |
| C | 2.16001  | -1.48440 | 0.11330  |
| C | 3.14349  | 0.47674  | 0.76141  |
| C | 2.07357  | 1.25338  | 0.32009  |
| C | 1.05774  | -0.78906 | -0.35501 |
| N | -0.07691 | -1.50302 | -0.91927 |
| N | -1.17182 | -1.53398 | 0.06677  |
| C | -2.20264 | -0.87970 | -0.33939 |
| C | -3.36401 | -0.70399 | 0.57021  |
| H | 0.18270  | -2.48557 | -1.11050 |
| H | 2.19589  | -2.56941 | 0.03228  |
| H | 3.99980  | 0.96853  | 1.21580  |
| H | 2.10805  | 2.33075  | 0.43478  |
| H | -2.24914 | -0.41252 | -1.32664 |
| H | -4.26539 | -1.03937 | 0.04576  |
| H | -0.37550 | -1.07794 | -1.81811 |
| H | -3.23048 | -1.32191 | 1.46174  |
| C | -3.49751 | 0.77721  | 0.94310  |
| H | -2.60818 | 1.12000  | 1.47891  |
| H | -3.62415 | 1.39647  | 0.05070  |
| H | -4.36798 | 0.92183  | 1.58789  |
| N | 3.21580  | -0.86658 | 0.67078  |
| O | -0.13780 | 1.17874  | -0.75416 |
| C | -0.26630 | 2.61143  | -0.59394 |
| H | -0.24074 | 2.87488  | 0.46522  |
| H | 0.52792  | 3.12525  | -1.13903 |
| H | -1.23659 | 2.85372  | -1.02220 |

There are no imaginary frequencies.

SCF energy: -586.986479 hartree  
 $\alpha\alpha/\beta\beta$ : -0.237782978 hartree  
 $\alpha\beta$ : -1.33159 hartree  
SCS-MP2 energy: -588.742906 hartree  
zero-point correction: +0.234822 hartree  
enthalpy correction: +0.248545 hartree  
free energy correction: +0.195542 hartree  
quasiharmonic free energy correction: +0.196474 hartree

#### S-83

|   |         |          |          |
|---|---------|----------|----------|
| C | 1.40039 | 0.53443  | -0.10605 |
| C | 1.52608 | -1.87276 | -0.18980 |
| C | 3.21391 | -0.71380 | 0.83398  |

|   |          |          |          |
|---|----------|----------|----------|
| C | 2.60500  | 0.51866  | 0.59317  |
| C | 0.84244  | -0.69874 | -0.48425 |
| N | -0.34925 | -0.72540 | -1.26862 |
| N | -1.41867 | -0.06750 | -0.65506 |
| C | -2.59922 | -0.54775 | -0.47711 |
| C | -3.69810 | 0.27898  | 0.06996  |
| H | -0.63926 | -1.68745 | -1.47521 |
| H | 1.10079  | -2.82937 | -0.49001 |
| H | 4.15989  | -0.74367 | 1.36898  |
| H | 3.08649  | 1.43076  | 0.92692  |
| H | -2.75748 | -1.59253 | -0.74297 |
| H | -4.49065 | 0.30459  | -0.68720 |
| H | -3.35097 | 1.30337  | 0.23456  |
| C | -4.23574 | -0.34186 | 1.36305  |
| H | -3.46017 | -0.36395 | 2.13215  |
| H | -5.07350 | 0.25510  | 1.73021  |
| H | -4.58822 | -1.36185 | 1.19042  |
| N | 2.70860  | -1.90226 | 0.45554  |
| O | 0.67748  | 1.63941  | -0.44723 |
| C | 1.17437  | 2.91503  | 0.01933  |
| H | 2.16168  | 3.11325  | -0.40237 |
| H | 0.45564  | 3.64555  | -0.34634 |
| H | 1.21121  | 2.93055  | 1.11062  |
| H | -1.19468 | 0.91348  | -0.42852 |

There are no imaginary frequencies.

SCF energy: -586.991395 hartree  
 $\alpha\alpha/\beta\beta$ : -0.237843809 hartree  
 $\alpha\beta$ : -1.32841 hartree  
SCS-MP2 energy: -588.7440496 hartree  
zero-point correction: +0.234537 hartree  
enthalpy correction: +0.248480 hartree  
free energy correction: +0.193730 hartree  
quasiharmonic free energy correction: +0.196014 hartree

**S-84**

|   |          |          |          |
|---|----------|----------|----------|
| C | 1.79587  | 0.42016  | 0.02055  |
| C | 0.60961  | -1.67975 | -0.14202 |
| C | 2.96055  | -1.66652 | 0.24816  |
| C | 2.98185  | -0.28029 | 0.23391  |
| C | 0.57656  | -0.28742 | -0.16520 |
| N | -0.56224 | 0.42461  | -0.42894 |
| N | -1.76601 | -0.25337 | -0.42286 |
| C | -2.82102 | 0.48997  | -0.35866 |
| C | -4.17802 | -0.12486 | -0.37288 |
| H | -0.56018 | 1.41584  | -0.17680 |
| H | -2.74268 | 1.58062  | -0.28091 |
| H | -4.07724 | -1.20226 | -0.53491 |
| H | -4.74092 | 0.28890  | -1.21861 |
| C | -4.93265 | 0.15853  | 0.92800  |
| H | -5.02025 | 1.23492  | 1.10271  |
| H | -5.94124 | -0.26184 | 0.88548  |
| H | -4.40977 | -0.28489 | 1.77999  |

|   |          |          |          |
|---|----------|----------|----------|
| N | 1.79095  | -2.30406 | 0.06244  |
| H | -0.26455 | -2.30183 | -0.27444 |
| H | 3.92641  | 0.22773  | 0.38508  |
| H | 3.83762  | -2.28203 | 0.40382  |
| O | 1.66664  | 1.76230  | -0.02243 |
| C | 2.87278  | 2.54971  | 0.12337  |
| H | 3.57221  | 2.31448  | -0.68120 |
| H | 2.54054  | 3.58269  | 0.04732  |
| H | 3.32681  | 2.36800  | 1.09958  |
| H | 1.78805  | -3.32620 | 0.07644  |

There are no imaginary frequencies.

SCF energy: -587.001250 hartree  
 $\alpha\alpha/\beta\beta$ : -0.238695775 hartree  
 $\alpha\beta$ : -1.3337053 hartree  
SCS-MP2 energy: -588.7608269 hartree  
zero-point correction: +0.232804 hartree  
enthalpy correction: +0.247107 hartree  
free energy correction: +0.192071 hartree  
quasiharmonic free energy correction: +0.193728 hartree

**S-85**

|   |          |          |          |
|---|----------|----------|----------|
| C | -1.33858 | -0.23921 | 0.03066  |
| C | -0.29809 | 1.70550  | -0.98226 |
| C | -1.82827 | 2.00638  | 0.69364  |
| C | -2.05204 | 0.63815  | 0.84691  |
| C | -0.46624 | 0.33347  | -0.90273 |
| N | 0.30684  | -0.56489 | -1.74529 |
| N | 1.40137  | -1.29414 | -1.06965 |
| C | 2.28245  | -0.36398 | -0.44348 |
| C | 2.53427  | -0.38138 | 0.87266  |
| H | 0.73839  | -0.04675 | -2.52941 |
| H | 0.39011  | 2.13304  | -1.70924 |
| H | -2.37149 | 2.70361  | 1.32650  |
| H | -2.75735 | 0.28673  | 1.59146  |
| H | 0.92107  | -1.86175 | -0.36159 |
| H | 2.80374  | 0.29224  | -1.13751 |
| H | 1.97308  | -1.06802 | 1.50752  |
| H | -0.30085 | -1.28788 | -2.16585 |
| C | 3.57930  | 0.46786  | 1.52109  |
| H | 4.36392  | -0.15172 | 1.96841  |
| H | 4.04344  | 1.14332  | 0.79745  |
| H | 3.14209  | 1.06539  | 2.32759  |
| N | -0.97659 | 2.55815  | -0.19303 |
| O | -1.39230 | -1.59178 | 0.03168  |
| C | -2.30802 | -2.20788 | 0.96929  |
| H | -2.19790 | -3.27728 | 0.80295  |
| H | -2.02846 | -1.95089 | 1.99281  |
| H | -3.33136 | -1.89316 | 0.75659  |

There are no imaginary frequencies.

SCF energy: -586.968952 hartree

$\alpha\alpha/\beta\beta$ : -0.238388049 hartree  
 $\alpha\beta$ : -1.3323005 hartree  
 SCS-MP2 energy: -588.7266379 hartree  
 zero-point correction: +0.234848 hartree  
 enthalpy correction: +0.248830 hartree  
 free energy correction: +0.194516 hartree  
 quasiharmonic free energy correction: +0.196428 hartree

**S-86**

|   |          |          |          |
|---|----------|----------|----------|
| C | -1.02269 | 0.57691  | -0.12797 |
| C | -1.15746 | -1.78933 | -0.56579 |
| C | -2.48346 | -0.89224 | 1.06986  |
| C | -1.97055 | 0.39060  | 0.87602  |
| C | -0.59437 | -0.54936 | -0.85248 |
| N | 0.31337  | -0.37841 | -1.93446 |
| N | 1.58017  | 0.20777  | -1.46150 |
| C | 2.23523  | -0.50954 | -0.37354 |
| C | 2.23791  | 0.00923  | 0.85673  |
| H | 0.57130  | -1.29274 | -2.32385 |
| H | -0.83065 | -2.66563 | -1.12431 |
| H | -3.23651 | -1.05345 | 1.83745  |
| H | -2.33651 | 1.21176  | 1.48194  |
| H | 2.18460  | 0.26770  | -2.29599 |
| H | 2.65061  | -1.46698 | -0.67004 |
| H | 1.77799  | 0.98327  | 1.02424  |
| H | 1.33942  | 1.17451  | -1.17797 |
| C | 2.86056  | -0.67808 | 2.02563  |
| H | 2.11113  | -0.84802 | 2.80515  |
| H | 3.29540  | -1.63830 | 1.73853  |
| H | 3.64407  | -0.04940 | 2.45992  |
| N | -2.10445 | -1.97959 | 0.37274  |
| O | -0.43176 | 1.75742  | -0.46978 |
| C | -0.74308 | 2.90663  | 0.35146  |
| H | -0.46481 | 2.71636  | 1.39010  |
| H | -0.14316 | 3.71588  | -0.05970 |
| H | -1.80502 | 3.14846  | 0.27569  |

There are no imaginary frequencies.

SCF energy: -586.970618 hartree  
 $\alpha\alpha/\beta\beta$ : -0.239351198 hartree  
 $\alpha\beta$ : -1.3346039 hartree  
 SCS-MP2 energy: -588.7317102 hartree  
 zero-point correction: +0.234832 hartree  
 enthalpy correction: +0.248702 hartree  
 free energy correction: +0.195177 hartree  
 quasiharmonic free energy correction: +0.196596 hartree

**S-87**

|   |         |          |          |
|---|---------|----------|----------|
| C | 1.37010 | 0.43731  | -0.15351 |
| C | 0.47996 | -1.80320 | -0.22866 |
| C | 2.49116 | -1.36387 | 0.96699  |

|   |          |          |          |
|---|----------|----------|----------|
| C | 2.42686  | -0.02072 | 0.63423  |
| C | 0.36838  | -0.46745 | -0.59124 |
| N | -0.63947 | -0.00903 | -1.42616 |
| N | -1.82691 | -0.77318 | -1.36736 |
| C | -2.76953 | -0.34618 | -0.40044 |
| C | -2.52669 | 0.45167  | 0.65230  |
| H | -0.80337 | 0.99630  | -1.31113 |
| H | -2.23474 | -0.81914 | -2.30013 |
| H | -3.74997 | -0.79150 | -0.56135 |
| H | -1.53973 | 0.88378  | 0.80575  |
| C | -3.58080 | 0.78665  | 1.66470  |
| H | -3.74933 | 1.86777  | 1.71987  |
| H | -4.53227 | 0.30752  | 1.41515  |
| H | -3.28833 | 0.45767  | 2.66818  |
| N | 1.52697  | -2.19450 | 0.53197  |
| H | -0.23875 | -2.55899 | -0.51482 |
| H | 3.20437  | 0.64259  | 0.99324  |
| H | 3.27890  | -1.79798 | 1.57001  |
| O | 1.17368  | 1.71266  | -0.54446 |
| C | 2.11783  | 2.70363  | -0.07295 |
| H | 3.11820  | 2.47847  | -0.44786 |
| H | 1.76235  | 3.64484  | -0.48643 |
| H | 2.11159  | 2.73995  | 1.01818  |
| H | 1.58393  | -3.18261 | 0.78940  |

There are no imaginary frequencies.

SCF energy: -586.983667 hartree  
 $\alpha\alpha/\beta\beta$ : -0.238674184 hartree  
 $\alpha\beta$ : -1.3311917 hartree  
 SCS-MP2 energy: -588.7402132 hartree  
 zero-point correction: +0.234347 hartree  
 enthalpy correction: +0.248160 hartree  
 free energy correction: +0.194572 hartree  
 quasiharmonic free energy correction: +0.196435 hartree

**TS S-88**

|   |          |          |          |
|---|----------|----------|----------|
| C | 1.05676  | 0.31891  | -0.24060 |
| C | -1.02294 | 0.80772  | -1.40567 |
| C | -0.04905 | 2.43800  | -0.13364 |
| C | 1.01893  | 1.62183  | 0.24738  |
| C | 0.05637  | -0.06512 | -1.17012 |
| N | 0.02580  | -1.36084 | -1.59494 |
| N | -0.93284 | -2.41167 | -0.24241 |
| C | -0.93123 | -1.61905 | 0.85554  |
| C | -1.84306 | -0.58973 | 0.91642  |
| H | -1.82448 | 0.48928  | -2.07087 |
| H | -0.08594 | 3.46130  | 0.23182  |
| H | 1.76965  | 2.00573  | 0.92868  |
| H | -0.19057 | -3.11805 | -0.14229 |
| H | -0.16017 | -1.70417 | 1.62391  |
| H | -2.63175 | -0.57255 | 0.16485  |
| H | -0.59318 | -1.57793 | -2.38064 |
| C | -1.87256 | 0.42163  | 1.99524  |

|   |          |          |          |
|---|----------|----------|----------|
| H | -2.87387 | 0.48315  | 2.43597  |
| H | -1.13778 | 0.20383  | 2.77440  |
| H | -1.65497 | 1.41856  | 1.58200  |
| H | 0.92345  | -1.85540 | -1.61603 |
| N | -1.06246 | 2.06660  | -0.94785 |
| O | 1.97616  | -0.62634 | 0.02659  |
| C | 3.02167  | -0.27522 | 0.96725  |
| H | 2.58210  | -0.01118 | 1.93104  |
| H | 3.62781  | -1.17378 | 1.05798  |
| H | 3.61753  | 0.54946  | 0.57203  |

$\alpha\alpha/\beta\beta$ : -0.246487949 hartree  
 $\alpha\beta$ : -1.3552454 hartree  
SCS-MP2 energy: -588.7063317 hartree  
zero-point correction: +0.231567 hartree  
enthalpy correction: +0.245004 hartree  
free energy correction: +0.193078 hartree  
quasiharmonic free energy correction: +0.194157 hartree

**TS S-90**

1 imaginary frequency: -119.98 cm<sup>-1</sup>.

SCF energy: -586.918797 hartree  
 $\alpha\alpha/\beta\beta$ : -0.245943734 hartree  
 $\alpha\beta$ : -1.3515755 hartree  
SCS-MP2 energy: -588.7046501 hartree  
zero-point correction: +0.231605 hartree  
enthalpy correction: +0.245026 hartree  
free energy correction: +0.193228 hartree  
quasiharmonic free energy correction: +0.194189 hartree

**TS S-89**

|   |          |          |          |
|---|----------|----------|----------|
| C | 1.08414  | 0.09112  | -0.29157 |
| C | -0.89770 | 0.94513  | -1.39106 |
| C | 0.41652  | 2.38836  | -0.20928 |
| C | 1.31867  | 1.39035  | 0.15593  |
| C | -0.00983 | -0.13925 | -1.18299 |
| N | -0.31383 | -1.35497 | -1.70241 |
| N | -1.41304 | -2.13873 | -0.19515 |
| C | -1.20682 | -1.37836 | 0.90303  |
| C | -1.81771 | -0.14626 | 0.98877  |
| H | -1.76970 | 0.77105  | -2.02084 |
| H | 0.59542  | 3.40958  | 0.11977  |
| H | 2.15643  | 1.64125  | 0.79734  |
| H | -2.26995 | -1.99502 | -0.73294 |
| H | -0.40992 | -1.68924 | 1.57124  |
| H | -2.64466 | 0.06201  | 0.31202  |
| H | 0.48143  | -1.98127 | -1.50909 |
| C | -1.53646 | 0.82156  | 2.07284  |
| H | -2.45653 | 1.05029  | 2.62073  |
| H | -0.77758 | 0.44683  | 2.76336  |
| H | -1.18268 | 1.76878  | 1.64028  |
| H | -1.05797 | -3.09832 | -0.20920 |
| N | -0.68534 | 2.19746  | -0.96871 |
| O | 1.83792  | -0.98996 | -0.01818 |
| C | 2.95581  | -0.81033 | 0.88256  |
| H | 2.60417  | -0.44754 | 1.85075  |
| H | 3.39305  | -1.80126 | 0.98611  |
| H | 3.68091  | -0.11772 | 0.45036  |

1 imaginary frequency: 140.79 cm<sup>-1</sup>.

SCF energy: -586.915712 hartree

|   |          |          |          |
|---|----------|----------|----------|
| C | -1.39117 | 0.11970  | 0.14737  |
| C | 0.81448  | 0.64973  | 1.01649  |
| C | -0.50279 | 2.34692  | 0.00692  |
| C | -1.52223 | 1.44493  | -0.26667 |
| C | -0.25022 | -0.27925 | 0.92126  |
| N | -0.12867 | -1.58461 | 1.26834  |
| N | 0.86230  | -2.29046 | -0.23234 |
| C | 1.95038  | -1.48740 | -0.27481 |
| C | 1.97009  | -0.22459 | -0.84531 |
| H | 1.65785  | 0.47880  | 1.67739  |
| H | 1.33343  | 2.63839  | 0.84027  |
| H | -0.55345 | 3.39257  | -0.27559 |
| H | -2.38778 | 1.79860  | -0.81270 |
| H | 0.15290  | -1.94339 | -0.89337 |
| H | 2.79586  | -1.80403 | 0.33775  |
| H | 1.13447  | 0.05346  | -1.49166 |
| H | 0.67495  | -1.68448 | 1.90400  |
| C | 3.21002  | 0.60378  | -0.93950 |
| H | 2.98577  | 1.66521  | -0.79455 |
| H | 3.95224  | 0.29068  | -0.20063 |
| H | 3.64875  | 0.50277  | -1.93904 |
| N | 0.59136  | 1.95548  | 0.66939  |
| O | -2.28549 | -0.84478 | -0.08734 |
| C | -3.46646 | -0.49140 | -0.84979 |
| H | -3.18041 | -0.12650 | -1.83809 |
| H | -4.02723 | -1.41937 | -0.93557 |
| H | -4.05093 | 0.25803  | -0.31301 |

1 imaginary frequency: -313.05 cm<sup>-1</sup>.

SCF energy: -586.909624 hartree  
 $\alpha\alpha/\beta\beta$ : -0.2474896 hartree  
 $\alpha\beta$ : -1.356016 hartree  
SCS-MP2 energy: -588.7018363 hartree  
zero-point correction: +0.232243 hartree  
enthalpy correction: +0.245467 hartree  
free energy correction: +0.194140 hartree  
quasiharmonic free energy correction: +0.194750 hartree

**S-91**

|   |          |          |          |
|---|----------|----------|----------|
| C | 1.51199  | -0.13973 | -0.12058 |
| C | -0.86460 | 0.60163  | -0.69469 |
| C | 0.88028  | 2.17661  | -0.50033 |



|   |          |          |          |
|---|----------|----------|----------|
| C | 1.86297  | 1.17762  | -0.12791 |
| C | 0.15297  | -0.47955 | -0.48641 |
| N | -0.17846 | -1.72755 | -0.61066 |
| N | -2.93816 | -1.39394 | -0.56691 |
| C | -2.99682 | -0.43408 | 0.28561  |
| C | -1.93311 | 0.61316  | 0.43554  |
| H | -1.38898 | 0.37843  | -1.63326 |
| H | 1.22312  | 3.20904  | -0.55210 |
| H | 2.86523  | 1.50571  | 0.12546  |
| H | -3.77525 | -1.98188 | -0.49737 |
| H | -3.84518 | -0.31245 | 0.96745  |
| H | -2.44292 | 1.57912  | 0.32432  |
| C | -1.31817 | 0.56199  | 1.83798  |
| H | -2.09620 | 0.72356  | 2.58944  |
| H | -0.85259 | -0.40880 | 2.03230  |
| H | -0.56601 | 1.34806  | 1.95310  |
| N | -0.36516 | 1.96384  | -0.79760 |
| O | 2.27864  | -1.21174 | 0.15822  |
| C | 3.65742  | -0.93713 | 0.50069  |
| H | 3.70285  | -0.32711 | 1.40542  |
| H | 4.10276  | -1.91386 | 0.67590  |
| H | 4.15610  | -0.43213 | -0.32951 |
| H | 0.51176  | -2.46379 | -0.44980 |
| H | -1.16900 | -1.94950 | -0.83022 |

There are no imaginary frequencies.

SCF energy: -586.998660 hartree  
 $\alpha\alpha/\beta\beta$ : -0.236992775 hartree  
 $\alpha\beta$ : -1.3388257 hartree  
SCS-MP2 energy: -588.7632461 hartree  
zero-point correction: +0.233663 hartree  
enthalpy correction: +0.247161 hartree  
free energy correction: +0.195383 hartree  
quasiharmonic free energy correction: +0.195980 hartree

### S-92

|   |          |          |          |
|---|----------|----------|----------|
| C | 1.49818  | -0.16163 | -0.12597 |
| C | -0.85118 | 0.62702  | -0.73860 |
| C | 0.92060  | 2.16260  | -0.48765 |
| C | 1.87436  | 1.14297  | -0.08429 |
| C | 0.15043  | -0.50131 | -0.59986 |
| N | -0.22440 | -1.70344 | -0.88899 |
| N | -2.93256 | -1.45280 | -0.31072 |
| C | -2.97562 | -0.34737 | 0.34240  |
| C | -1.88090 | 0.65526  | 0.41709  |
| H | 0.53508  | -2.37303 | -0.71440 |
| H | -1.40267 | 0.45251  | -1.67067 |
| H | 1.29014  | 3.18788  | -0.52655 |
| H | 2.86383  | 1.45815  | 0.22805  |
| H | -3.88578 | -0.14196 | 0.90245  |
| H | -2.38583 | 1.62685  | 0.34411  |
| C | -1.24114 | 0.56403  | 1.81337  |
| H | -1.99554 | 0.72129  | 2.58905  |

|   |          |          |          |
|---|----------|----------|----------|
| H | -0.77951 | -0.41478 | 1.96858  |
| H | -0.48097 | 1.34331  | 1.91109  |
| N | -0.31982 | 1.98990  | -0.82341 |
| O | 2.24539  | -1.24694 | 0.17927  |
| C | 3.60544  | -0.98551 | 0.58549  |
| H | 3.61820  | -0.38651 | 1.49921  |
| H | 4.04123  | -1.96560 | 0.76918  |
| H | 4.14597  | -0.47236 | -0.21347 |
| H | -3.73281 | -2.08810 | -0.28854 |
| H | -2.05804 | -1.74413 | -0.80232 |

There are no imaginary frequencies.

SCF energy: -587.000028 hartree  
 $\alpha\alpha/\beta\beta$ : -0.236400902 hartree  
 $\alpha\beta$ : -1.3380148 hartree  
SCS-MP2 energy: -588.7632464 hartree  
zero-point correction: +0.234514 hartree  
enthalpy correction: +0.247956 hartree  
free energy correction: +0.196115 hartree  
quasiharmonic free energy correction: +0.196984 hartree

### S-93

|   |          |          |          |
|---|----------|----------|----------|
| C | 1.63076  | 0.07474  | -0.13777 |
| C | -0.86059 | -0.18923 | -0.70317 |
| C | 0.14801  | 1.96606  | -0.14479 |
| C | 1.43381  | 1.40697  | 0.10055  |
| C | 0.53491  | -0.76375 | -0.67926 |
| N | 0.68814  | -1.97430 | -1.09072 |
| N | -3.53835 | 0.57674  | -0.45663 |
| C | -3.17490 | -0.41473 | 0.27657  |
| C | -1.73997 | -0.84390 | 0.38328  |
| H | 1.67026  | -2.25189 | -0.96062 |
| H | -1.30821 | -0.40257 | -1.67934 |
| H | -3.87944 | -0.99424 | 0.88282  |
| H | -1.69839 | -1.92087 | 0.16946  |
| H | -4.55232 | 0.71392  | -0.38266 |
| C | -1.22804 | -0.61345 | 1.80858  |
| H | -0.23364 | -1.04826 | 1.94365  |
| H | -1.18334 | 0.45393  | 2.04439  |
| H | -1.90394 | -1.09021 | 2.52435  |
| N | -0.86913 | 1.26321  | -0.54715 |
| O | 2.76787  | -0.59959 | 0.01925  |
| C | 3.92057  | 0.14268  | 0.49339  |
| H | 3.71235  | 0.55575  | 1.48199  |
| H | 4.72199  | -0.59043 | 0.54350  |
| H | 4.16489  | 0.93448  | -0.21697 |
| H | -0.02081 | 3.03162  | -0.01457 |
| H | 2.21259  | 2.06656  | 0.46143  |
| H | -1.79698 | 1.68697  | -0.67416 |

There are no imaginary frequencies.

SCF energy: -587.004633 hartree

$\alpha\alpha/\beta\beta$ : -0.235448926 hartree  
 $\alpha\beta$ : -1.3348763 hartree  
 SCS-MP2 energy: -588.7634505 hartree  
 zero-point correction: +0.234257 hartree  
 enthalpy correction: +0.247945 hartree  
 free energy correction: +0.195101 hartree  
 quasiharmonic free energy correction: +0.196342 hartree

### **3-hydrazinyl-2-methoxypyridine (37)**

#### **S-94**

|   |          |          |          |
|---|----------|----------|----------|
| C | -2.15599 | -1.50924 | 0.12570  |
| C | -0.99678 | 0.57912  | -0.26509 |
| C | -3.05301 | 0.62509  | 0.74335  |
| C | -3.18988 | -0.75670 | 0.68770  |
| C | -1.05946 | -0.82060 | -0.35640 |
| N | 0.08355  | -1.52337 | -0.92115 |
| N | 1.17694  | -1.54198 | 0.06588  |
| C | 2.19887  | -0.87069 | -0.33532 |
| C | 3.35597  | -0.68348 | 0.57746  |
| H | 0.37753  | -1.09594 | -1.82029 |
| H | -3.83532 | 1.24072  | 1.17944  |
| H | -4.08033 | -1.23691 | 1.07865  |
| H | -2.20212 | -2.59388 | 0.05905  |
| H | 2.24163  | -0.39943 | -1.32052 |
| H | 3.22546  | -1.30186 | 1.46917  |
| H | -0.16744 | -2.50837 | -1.11004 |
| H | 4.26153  | -1.01197 | 0.05574  |
| C | 3.47632  | 0.79905  | 0.94916  |
| H | 3.59948  | 1.41837  | 0.05633  |
| H | 2.58317  | 1.13488  | 1.48296  |
| H | 4.34426  | 0.95172  | 1.59553  |
| N | -1.97571 | 1.29671  | 0.27557  |
| O | 0.11569  | 1.15890  | -0.76992 |
| C | 0.23679  | 2.59075  | -0.59596 |
| H | 1.19930  | 2.83816  | -1.03944 |
| H | -0.56907 | 3.10836  | -1.11726 |
| H | 0.22599  | 2.84564  | 0.46437  |

There are no imaginary frequencies.

SCF energy: -586.993586 hartree  
 $\alpha\alpha/\beta\beta$ : -0.2378149 hartree  
 $\alpha\beta$ : -1.3308925 hartree  
 SCS-MP2 energy: -588.7492003 hartree  
 zero-point correction: +0.234309 hartree  
 enthalpy correction: +0.248135 hartree  
 free energy correction: +0.194763 hartree  
 quasiharmonic free energy correction: +0.195843 hartree

#### **S-95**

|   |          |          |          |
|---|----------|----------|----------|
| C | -1.57618 | -1.88460 | -0.16579 |
|---|----------|----------|----------|

|   |          |          |          |
|---|----------|----------|----------|
| C | -1.39256 | 0.51004  | -0.10933 |
| C | -3.23257 | -0.47053 | 0.83802  |
| C | -2.79846 | -1.74383 | 0.49913  |
| C | -0.85187 | -0.74108 | -0.46941 |
| N | 0.34837  | -0.80163 | -1.23794 |
| N | 1.41617  | -0.12281 | -0.64878 |
| C | 2.60038  | -0.59144 | -0.46440 |
| C | 3.69546  | 0.26250  | 0.04831  |
| H | 0.63573  | -1.77114 | -1.40866 |
| H | -4.17220 | -0.32049 | 1.36307  |
| H | -3.39369 | -2.61401 | 0.75654  |
| H | -1.18467 | -2.86275 | -0.43782 |
| H | 2.76439  | -1.64241 | -0.70084 |
| H | 3.34066  | 1.29022  | 0.17063  |
| H | 4.48555  | 0.26352  | -0.71186 |
| C | 4.24255  | -0.29746 | 1.36494  |
| H | 4.60378  | -1.32082 | 1.23580  |
| H | 5.07610  | 0.32212  | 1.70317  |
| H | 3.46969  | -0.29333 | 2.13708  |
| N | -2.53628 | 0.65459  | 0.54485  |
| O | -0.64130 | 1.59719  | -0.45843 |
| C | -1.12279 | 2.88718  | -0.01511 |
| H | -2.10870 | 3.08943  | -0.43401 |
| H | -1.16048 | 2.92614  | 1.07433  |
| H | -0.39259 | 3.59758  | -0.39831 |
| H | 1.18525  | 0.86277  | -0.44671 |

There are no imaginary frequencies.

SCF energy: -586.998324 hartree  
 $\alpha\alpha/\beta\beta$ : -0.2379585 hartree  
 $\alpha\beta$ : -1.3280047 hartree  
 SCS-MP2 energy: -588.7505687 hartree  
 zero-point correction: +0.234394 hartree  
 enthalpy correction: +0.248185 hartree  
 free energy correction: +0.194614 hartree  
 quasiharmonic free energy correction: +0.195972 hartree

#### **S-96**

|   |          |          |          |
|---|----------|----------|----------|
| C | 0.78214  | -1.66370 | 0.33689  |
| C | 1.79874  | 0.42875  | -0.29783 |
| C | 3.13051  | -1.55057 | -0.21239 |
| C | 2.02047  | -2.27993 | 0.18542  |
| C | 0.64505  | -0.28690 | 0.07936  |
| N | -0.51797 | 0.41214  | 0.21879  |
| N | -1.69471 | -0.28648 | 0.39560  |
| C | -2.77309 | 0.41581  | 0.27512  |
| C | -4.11020 | -0.21890 | 0.44295  |
| H | -0.56076 | 1.35097  | -0.18684 |
| H | -0.08829 | -2.23665 | 0.63638  |
| H | -2.72981 | 1.48278  | 0.02765  |
| H | -4.64791 | 0.29872  | 1.24680  |
| H | -3.97458 | -1.26034 | 0.74953  |
| C | -4.92541 | -0.13678 | -0.85013 |

|   |          |          |          |
|---|----------|----------|----------|
| H | -4.42727 | -0.68549 | -1.65428 |
| H | -5.91994 | -0.56776 | -0.70505 |
| H | -5.04865 | 0.90196  | -1.17022 |
| N | 2.96484  | -0.22697 | -0.43855 |
| O | 1.76492  | 1.74707  | -0.60660 |
| C | 2.04326  | 2.61216  | 0.54160  |
| H | 3.06938  | 2.45412  | 0.87827  |
| H | 1.91402  | 3.62588  | 0.16837  |
| H | 1.33540  | 2.40411  | 1.34575  |
| H | 2.12940  | -3.34211 | 0.37537  |
| H | 4.12545  | -1.94954 | -0.36265 |
| H | 3.77036  | 0.33640  | -0.73322 |

SCF energy: -586.976089 hartree  
 $\alpha\alpha/\beta\beta$ : -0.2375531 hartree  
 $\alpha\beta$ : -1.3298342 hartree  
SCS-MP2 energy: -588.7302588 hartree  
zero-point correction: +0.234484 hartree  
enthalpy correction: +0.248631 hartree  
free energy correction: +0.193986 hartree  
quasiharmonic free energy correction: +0.195519 hartree

**S-98**

There are no imaginary frequencies.

SCF energy: -586.993508 hartree  
 $\alpha\alpha/\beta\beta$ : -0.2387697 hartree  
 $\alpha\beta$ : -1.3336819 hartree  
SCS-MP2 energy: -588.7531061 hartree  
zero-point correction: +0.232367 hartree  
enthalpy correction: +0.246821 hartree  
free energy correction: +0.191422 hartree  
quasiharmonic free energy correction: +0.193133 hartree

**S-97**

|   |          |          |          |
|---|----------|----------|----------|
| C | -1.68785 | 1.86202  | -0.14010 |
| C | -1.45184 | -0.54468 | -0.10919 |
| C | -3.50427 | 0.36802  | 0.32602  |
| C | -3.03465 | 1.66718  | 0.17706  |
| C | -0.90494 | 0.73419  | -0.28976 |
| N | 0.50760  | 0.82590  | -0.61803 |
| N | 1.36115  | 0.55751  | 0.55639  |
| C | 2.72867  | 0.74849  | 0.18180  |
| C | 3.63852  | -0.23293 | 0.24104  |
| H | 0.73205  | 1.78488  | -0.93329 |
| H | -4.54759 | 0.18173  | 0.56641  |
| H | -3.70508 | 2.51057  | 0.30215  |
| H | -1.26359 | 2.85456  | -0.27467 |
| H | 1.19586  | -0.43706 | 0.75318  |
| H | 2.97959  | 1.77731  | -0.06856 |
| H | 3.31233  | -1.23995 | 0.50222  |
| H | 0.74764  | 0.18254  | -1.39598 |
| C | 5.09813  | -0.01635 | 0.00199  |
| H | 5.45970  | -0.67575 | -0.79365 |
| H | 5.30227  | 1.01921  | -0.28293 |
| H | 5.67934  | -0.24837 | 0.90071  |
| N | -2.73125 | -0.73510 | 0.18958  |
| O | -0.58533 | -1.57755 | -0.25377 |
| C | -1.12639 | -2.90776 | -0.06631 |
| H | -1.52264 | -3.01717 | 0.94373  |
| H | -1.90533 | -3.10909 | -0.80208 |
| H | -0.27674 | -3.57034 | -0.21800 |

There are no imaginary frequencies.

|   |          |          |          |
|---|----------|----------|----------|
| C | 1.15886  | -1.81534 | -0.55690 |
| C | 1.03839  | 0.54469  | -0.13391 |
| C | 2.50114  | -0.71447 | 1.09715  |
| C | 2.14251  | -1.87973 | 0.43439  |
| C | 0.59111  | -0.58307 | -0.85337 |
| N | -0.32370 | -0.40655 | -1.92872 |
| N | -1.57189 | 0.21618  | -1.45864 |
| C | -2.25632 | -0.49095 | -0.38217 |
| C | -2.24896 | 0.01216  | 0.85457  |
| H | -0.60402 | -1.32002 | -2.30402 |
| H | 3.25633  | -0.72435 | 1.87879  |
| H | 2.61262  | -2.82362 | 0.69110  |
| H | 0.83322  | -2.70467 | -1.09289 |
| H | -1.29910 | 1.17197  | -1.16352 |
| H | -2.70276 | -1.42982 | -0.69273 |
| H | -1.75750 | 0.96775  | 1.03787  |
| H | -2.16912 | 0.30383  | -2.29567 |
| C | -2.90496 | -0.66781 | 2.00955  |
| H | -3.67088 | -0.01822 | 2.44451  |
| H | -3.36978 | -1.60888 | 1.70627  |
| H | -2.16921 | -0.87281 | 2.79355  |
| N | 1.94908  | 0.49290  | 0.82844  |
| O | 0.44671  | 1.72980  | -0.47148 |
| C | 0.75358  | 2.86860  | 0.36667  |
| H | 0.16136  | 3.68160  | -0.04905 |
| H | 0.46211  | 2.67123  | 1.39916  |
| H | 1.81644  | 3.10545  | 0.31519  |

There are no imaginary frequencies.

SCF energy: -586.978022 hartree  
 $\alpha\alpha/\beta\beta$ : -0.2393746 hartree  
 $\alpha\beta$ : -1.3339335 hartree  
SCS-MP2 energy: -588.7383253 hartree  
zero-point correction: +0.234775 hartree  
enthalpy correction: +0.248544 hartree  
free energy correction: +0.195528 hartree  
quasiharmonic free energy correction: +0.196618 hartree

**S-99**

|   |          |          |          |
|---|----------|----------|----------|
| C | -0.37643 | -1.82640 | -0.26412 |
|---|----------|----------|----------|

|   |          |          |          |
|---|----------|----------|----------|
| C | -1.35246 | 0.37210  | -0.14146 |
| C | -2.42997 | -1.46653 | 0.93809  |
| C | -1.43785 | -2.31663 | 0.50494  |
| C | -0.31338 | -0.47479 | -0.59554 |
| N | 0.65621  | 0.08609  | -1.41358 |
| N | 1.87915  | -0.61773 | -1.43151 |
| C | 2.81405  | -0.22787 | -0.44245 |
| C | 2.54769  | 0.46521  | 0.67646  |
| H | 0.77611  | 1.09088  | -1.24883 |
| H | 0.41404  | -2.48616 | -0.60493 |
| H | 2.27254  | -0.56677 | -2.37011 |
| H | 3.81167  | -0.61187 | -0.64899 |
| H | 1.54306  | 0.83407  | 0.87420  |
| C | 3.59619  | 0.75758  | 1.70743  |
| H | 3.33840  | 0.31176  | 2.67473  |
| H | 4.56945  | 0.36208  | 1.40176  |
| H | 3.70369  | 1.83529  | 1.87184  |
| N | -2.34487 | -0.14742 | 0.59960  |
| H | -1.49023 | -3.36795 | 0.76490  |
| H | -3.28709 | -1.74925 | 1.53551  |
| O | -1.28367 | 1.66576  | -0.46519 |
| C | -2.35536 | 2.54777  | -0.03442 |
| H | -2.40251 | 2.57537  | 1.05597  |
| H | -2.07645 | 3.52336  | -0.42365 |
| H | -3.30254 | 2.22217  | -0.46964 |
| H | -3.08901 | 0.47177  | 0.93354  |

There are no imaginary frequencies.

SCF energy: -586.978813 hartree  
 $\alpha/\beta$ : -0.2386184 hartree  
 $\alpha$ : -1.3308202 hartree  
SCS-MP2 energy: -588.7348761 hartree  
zero-point correction: +0.233544 hartree  
enthalpy correction: +0.247552 hartree  
free energy correction: +0.193395 hartree  
quasiharmonic free energy correction: +0.195286 hartree

**TS S-100**

|   |          |          |          |
|---|----------|----------|----------|
| C | -0.21340 | 2.28859  | -0.83325 |
| C | 1.03159  | -0.10155 | -0.28663 |
| C | -0.85194 | 1.11873  | -1.23728 |
| C | 0.98570  | 2.18683  | -0.13788 |
| C | -0.13533 | -0.11170 | -1.14418 |
| N | -0.53063 | -1.23558 | -1.71184 |
| N | -2.03342 | -2.04248 | 0.13533  |
| C | -1.46039 | -1.18275 | 0.95249  |
| C | -1.65400 | 0.22529  | 0.93101  |
| H | -1.77319 | 1.14147  | -1.81587 |
| H | -0.67953 | 3.25700  | -0.98136 |
| H | 1.51195  | 3.07800  | 0.19380  |
| H | -2.71385 | -1.53220 | -0.44838 |
| H | -0.71384 | -1.58070 | 1.64291  |
| H | -2.53557 | 0.58211  | 0.39591  |

|   |          |          |          |
|---|----------|----------|----------|
| H | -1.29801 | -1.23661 | -2.38243 |
| C | -1.09249 | 1.08506  | 1.98990  |
| H | -1.91048 | 1.50482  | 2.58903  |
| H | -0.40323 | 0.53639  | 2.63595  |
| H | -0.55902 | 1.95644  | 1.57199  |
| H | 0.02167  | -2.08440 | -1.61151 |
| N | 1.59829  | 1.00440  | 0.15699  |
| O | 1.55959  | -1.30998 | -0.06928 |
| C | 2.76001  | -1.35425 | 0.74783  |
| H | 2.55844  | -0.92711 | 1.73024  |
| H | 2.99428  | -2.41343 | 0.82576  |
| H | 3.56539  | -0.81174 | 0.25269  |

1 imaginary frequency: -77.04 cm<sup>-1</sup>.

SCF energy: -586.924442 hartree  
 $\alpha/\beta$ : -0.2459435 hartree  
 $\alpha$ : -1.3528196 hartree  
SCS-MP2 energy: -588.7117878 hartree  
zero-point correction: +0.230075 hartree  
enthalpy correction: +0.243649 hartree  
free energy correction: +0.192266 hartree  
quasiharmonic free energy correction: +0.192559 hartree

**TS S-101**

|   |          |          |          |
|---|----------|----------|----------|
| C | -0.77593 | 2.03722  | -0.97290 |
| C | 1.07609  | 0.14339  | -0.27457 |
| C | -1.01813 | 0.70545  | -1.33080 |
| C | 0.36612  | 2.32637  | -0.24883 |
| C | 0.02405  | -0.25580 | -1.19450 |
| N | -0.09388 | -1.47238 | -1.73070 |
| N | -1.30098 | -2.31112 | 0.06963  |
| C | -1.15549 | -1.34995 | 0.96035  |
| C | -1.83520 | -0.12510 | 0.83540  |
| H | -1.87281 | 0.44125  | -1.95150 |
| H | -1.49925 | 2.81741  | -1.18877 |
| H | 0.59735  | 3.34581  | 0.05087  |
| H | -2.04727 | -2.27407 | -0.62402 |
| H | -0.38709 | -1.49053 | 1.71651  |
| H | -2.72706 | -0.10738 | 0.21238  |
| H | 0.73808  | -2.01785 | -1.46218 |
| C | -1.64790 | 0.92466  | 1.86460  |
| H | -2.61037 | 1.16056  | 2.32882  |
| H | -0.93542 | 0.60615  | 2.62882  |
| H | -1.27279 | 1.85764  | 1.41710  |
| H | -0.82029 | -3.20393 | 0.18396  |
| N | 1.27418  | 1.38284  | 0.13464  |
| O | 1.93311  | -0.83907 | 0.06007  |
| C | 3.02457  | -0.47319 | 0.93734  |
| H | 3.56919  | -1.40146 | 1.09859  |
| H | 3.66201  | 0.27012  | 0.45742  |
| H | 2.63652  | -0.08479 | 1.87991  |

1 imaginary frequency: -72.94 cm<sup>-1</sup>.

SCF energy: -586.916960 hartree  
 $\alpha\alpha/\beta\beta$ : -0.2471778 hartree  
 $\alpha\beta$ : -1.3586791 hartree  
SCS-MP2 energy: -588.7121601 hartree  
zero-point correction: +0.230867 hartree  
enthalpy correction: +0.244366 hartree  
free energy correction: +0.192697 hartree  
quasiharmonic free energy correction: +0.193354 hartree

**TS S-102**

|   |          |          |          |
|---|----------|----------|----------|
| C | 0.55407  | 2.01721  | 0.71901  |
| C | -1.35661 | 0.05824  | 0.16808  |
| C | 0.80997  | 0.66629  | 1.06987  |
| C | -0.59817 | 2.33071  | 0.05969  |
| C | -0.20697 | -0.30975 | 0.93933  |
| N | -0.07698 | -1.62642 | 1.24516  |
| N | 0.98251  | -2.25587 | -0.23331 |
| C | 2.03185  | -1.40169 | -0.26113 |
| C | 2.00497  | -0.15141 | -0.85540 |
| H | 1.65562  | 0.43692  | 1.71360  |
| H | 1.28283  | 2.79433  | 0.92063  |
| H | -0.88496 | 3.32130  | -0.27064 |
| H | -2.35633 | 1.60318  | -0.71850 |
| H | 0.27281  | -1.94587 | -0.91223 |
| H | 2.88026  | -1.67164 | 0.36920  |
| H | 1.15545  | 0.08282  | -1.50062 |
| H | 0.71039  | -1.72789 | 1.89998  |
| C | 3.20815  | 0.72656  | -0.96228 |
| H | 2.93095  | 1.78003  | -0.86508 |
| H | 3.94941  | 0.47752  | -0.19844 |
| H | 3.67082  | 0.60225  | -1.94858 |
| N | -1.51727 | 1.33408  | -0.19845 |
| O | -2.24112 | -0.88148 | -0.12600 |
| C | -3.43169 | -0.51782 | -0.87940 |
| H | -3.97111 | -1.45344 | -0.99868 |
| H | -4.02979 | 0.19576  | -0.30899 |
| H | -3.14866 | -0.11594 | -1.85400 |

1 imaginary frequency: -326.59 cm<sup>-1</sup>.

SCF energy: -586.907518 hartree  
 $\alpha\alpha/\beta\beta$ : -0.2468446 hartree  
 $\alpha\beta$ : -1.3554003 hartree  
SCS-MP2 energy: -588.6985614 hartree  
zero-point correction: +0.232170 hartree  
enthalpy correction: +0.245342 hartree  
free energy correction: +0.194111 hartree  
quasiharmonic free energy correction: +0.194809 hartree

**S-103**

|   |         |         |          |
|---|---------|---------|----------|
| C | 0.87273 | 0.62735 | -0.68476 |
|---|---------|---------|----------|

|   |          |          |          |
|---|----------|----------|----------|
| C | -1.50637 | -0.12645 | -0.13673 |
| C | -1.09378 | 2.13246  | -0.45875 |
| C | 0.21346  | 1.96651  | -0.73373 |
| C | -0.12349 | -0.46864 | -0.50055 |
| N | 0.20490  | -1.71063 | -0.64405 |
| N | 2.94912  | -1.36689 | -0.58482 |
| C | 3.02591  | -0.40380 | 0.26277  |
| C | 1.95324  | 0.63021  | 0.44340  |
| H | 0.84059  | 2.82257  | -0.96607 |
| H | 1.39785  | 0.43951  | -1.63318 |
| H | 3.79011  | -1.95144 | -0.53839 |
| H | 3.89249  | -0.27580 | 0.92004  |
| H | 2.45694  | 1.60302  | 0.36367  |
| C | 1.34020  | 0.52809  | 1.84495  |
| H | 0.57474  | 1.29791  | 1.98042  |
| H | 0.88927  | -0.45535 | 2.00901  |
| H | 2.11387  | 0.67738  | 2.60340  |
| N | -1.97050 | 1.08179  | -0.12154 |
| H | -1.56228 | 3.11059  | -0.48308 |
| O | -2.23895 | -1.21014 | 0.16789  |
| C | -3.62162 | -0.96419 | 0.52616  |
| H | -4.14406 | -0.48695 | -0.30342 |
| H | -4.03182 | -1.95138 | 0.72615  |
| H | -3.66923 | -0.33547 | 1.41590  |
| H | -0.48678 | -2.45087 | -0.50179 |
| H | 1.20343  | -1.92175 | -0.85959 |

There are no imaginary frequencies.

SCF energy: -586.997176 hartree  
 $\alpha\alpha/\beta\beta$ : -0.2369193 hartree  
 $\alpha\beta$ : -1.3385296 hartree  
SCS-MP2 energy: -588.7613578 hartree  
zero-point correction: +0.232596 hartree  
enthalpy correction: +0.246374 hartree  
free energy correction: +0.193638 hartree  
quasiharmonic free energy correction: +0.194581 hartree

**S-104**

|   |          |          |          |
|---|----------|----------|----------|
| C | 0.87247  | 0.66249  | -0.72267 |
| C | -1.47891 | -0.14948 | -0.14800 |
| C | -1.13138 | 2.11093  | -0.45888 |
| C | 0.17250  | 1.98844  | -0.76272 |
| C | -0.11520 | -0.47850 | -0.64435 |
| N | 0.24024  | -1.66553 | -1.00099 |
| N | 2.96107  | -1.40020 | -0.33787 |
| C | 2.98070  | -0.32983 | 0.37294  |
| C | 1.88112  | 0.66685  | 0.45799  |
| H | 0.76006  | 2.86691  | -1.01682 |
| H | 1.44537  | 0.53787  | -1.65180 |
| H | 3.87223  | -0.15592 | 0.97218  |
| H | 2.38885  | 1.64055  | 0.43985  |
| H | -0.52932 | -2.33309 | -0.86574 |
| C | 1.20722  | 0.51763  | 1.83374  |

|   |          |          |          |
|---|----------|----------|----------|
| H | 0.43409  | 1.28363  | 1.93531  |
| H | 0.75302  | -0.47134 | 1.94154  |
| H | 1.93644  | 0.65527  | 2.63661  |
| N | -1.97538 | 1.04003  | -0.07376 |
| H | -1.62995 | 3.07510  | -0.48496 |
| O | -2.17589 | -1.25029 | 0.19859  |
| C | -3.53689 | -1.02718 | 0.63382  |
| H | -3.92507 | -2.02080 | 0.84837  |
| H | -3.54873 | -0.40626 | 1.53061  |
| H | -4.11309 | -0.54995 | -0.15978 |
| H | 3.75942  | -2.03807 | -0.32021 |
| H | 2.11251  | -1.66977 | -0.87665 |

SCF energy: -586.994394 hartree  
 $\alpha/\beta$ : -0.2355573 hartree  
 $\alpha\beta$ : -1.3363799 hartree  
SCS-MP2 energy: -588.7550881 hartree  
zero-point correction: +0.233842 hartree  
enthalpy correction: +0.247491 hartree  
free energy correction: +0.195274 hartree  
quasiharmonic free energy correction: +0.196159 hartree

#### 4-hydrazinyl-3-methoxypyridine (35)

There are no imaginary frequencies.

SCF energy: -587.004665 hartree  
 $\alpha/\beta$ : -0.2359875 hartree  
 $\alpha\beta$ : -1.3365826 hartree  
SCS-MP2 energy: -588.7658891 hartree  
zero-point correction: +0.234181 hartree  
enthalpy correction: +0.247731 hartree  
free energy correction: +0.195775 hartree  
quasiharmonic free energy correction: +0.196437 hartree

#### **S-105**

|   |          |          |          |
|---|----------|----------|----------|
| C | 1.13068  | 0.20559  | -0.87132 |
| C | -1.35127 | 0.06336  | -0.24818 |
| C | -0.18739 | 2.14035  | -0.00849 |
| C | 0.97773  | 1.62356  | -0.41682 |
| C | -0.18904 | -0.51215 | -0.98103 |
| N | -0.29646 | -1.57971 | -1.69041 |
| N | 0.33908  | -0.67407 | 1.64988  |
| C | 1.56339  | -0.92198 | 1.35125  |
| C | 2.11764  | -0.62072 | -0.00699 |
| H | 2.26178  | -1.38093 | 2.06093  |
| H | 2.23822  | -1.58519 | -0.52316 |
| H | -1.25377 | -1.95101 | -1.62918 |
| C | 3.49498  | 0.03553  | 0.09987  |
| H | 3.88440  | 0.26819  | -0.89561 |
| H | 3.45310  | 0.95921  | 0.68331  |
| H | 4.19660  | -0.64503 | 0.59098  |
| N | -1.35381 | 1.33647  | 0.06862  |
| H | 0.13989  | -0.96430 | 2.61457  |
| H | 1.56323  | 0.22069  | -1.88099 |
| H | 1.84185  | 2.27895  | -0.45538 |
| H | -0.34431 | 3.16873  | 0.29112  |
| O | -2.37399 | -0.73291 | -0.09690 |
| C | -3.57080 | -0.24316 | 0.58296  |
| H | -3.30363 | 0.07849  | 1.59062  |
| H | -4.01429 | 0.56473  | -0.00016 |
| H | -4.23201 | -1.10411 | 0.61430  |
| H | -2.17628 | 1.75374  | 0.50963  |

There are no imaginary frequencies.

#### **S-106**

|   |          |          |          |
|---|----------|----------|----------|
| C | 0.98536  | 0.59008  | -0.26629 |
| C | 2.15981  | -1.49927 | 0.11431  |
| C | 2.07702  | 1.24566  | 0.31891  |
| C | 1.06016  | -0.80460 | -0.35894 |
| N | -0.08350 | -1.50775 | -0.92876 |
| N | -1.17316 | -1.53602 | 0.06041  |
| C | -2.20404 | -0.87888 | -0.33990 |
| C | -3.36225 | -0.70555 | 0.57408  |
| H | 0.17029  | -2.49012 | -1.12716 |
| H | 2.21427  | -2.58254 | 0.04342  |
| H | 2.08898  | 2.32569  | 0.42161  |
| H | -2.25376 | -0.40867 | -1.32549 |
| H | -4.26492 | -1.04139 | 0.05206  |
| H | -0.37958 | -1.07184 | -1.82317 |
| H | -3.22518 | -1.32457 | 1.46432  |
| C | -3.49679 | 0.77494  | 0.94931  |
| H | -2.60672 | 1.11821  | 1.48357  |
| H | -3.62654 | 1.39524  | 0.05809  |
| H | -4.36596 | 0.91734  | 1.59635  |
| O | -0.13321 | 1.16757  | -0.76476 |
| C | -0.26703 | 2.59719  | -0.58754 |
| H | -1.23913 | 2.84060  | -1.01127 |
| H | -0.24085 | 2.84988  | 0.47456  |
| H | 0.52314  | 3.12242  | -1.12807 |
| C | 3.19266  | -0.75024 | 0.67605  |
| H | 4.08123  | -1.24498 | 1.05713  |
| N | 3.15966  | 0.59209  | 0.78295  |

There are no imaginary frequencies.

SCF energy: -586.977953 hartree  
 $\alpha/\beta$ : -0.238656252 hartree  
 $\alpha\beta$ : -1.3345712 hartree  
SCS-MP2 energy: -588.7385426 hartree  
zero-point correction: +0.234512 hartree  
enthalpy correction: +0.248283 hartree  
free energy correction: +0.195102 hartree  
quasiharmonic free energy correction: +0.196101 hartree

**S-107**

|   |          |          |          |
|---|----------|----------|----------|
| C | -1.37094 | 0.52923  | -0.11527 |
| C | -1.68274 | -1.85519 | -0.11449 |
| C | -2.61259 | 0.64324  | 0.51344  |
| C | -0.88106 | -0.75676 | -0.40304 |
| N | 0.33883  | -0.92183 | -1.11527 |
| N | 1.41415  | -0.20271 | -0.59985 |
| C | 2.60963  | -0.65044 | -0.43947 |
| C | 3.71174  | 0.23626  | -0.00427 |
| H | 0.60706  | -1.90771 | -1.19926 |
| H | -1.33716 | -2.86187 | -0.33692 |
| H | -3.01631 | 1.61626  | 0.77344  |
| H | 2.77923  | -1.70859 | -0.63628 |
| H | 3.34719  | 1.26255  | 0.09894  |
| H | 4.46840  | 0.22202  | -0.79768 |
| C | 4.32376  | -0.27183 | 1.30494  |
| H | 4.69097  | -1.29526 | 1.19415  |
| H | 5.16410  | 0.36731  | 1.58489  |
| H | 3.58593  | -0.24960 | 2.11031  |
| O | -0.56309 | 1.57418  | -0.47494 |
| C | -0.97185 | 2.89745  | -0.05971 |
| H | -0.17397 | 3.55523  | -0.39831 |
| H | -1.91375 | 3.17019  | -0.53981 |
| H | -1.06586 | 2.94318  | 1.02729  |
| N | -3.39090 | -0.42008 | 0.80632  |
| C | -2.92251 | -1.63903 | 0.48386  |
| H | -3.56442 | -2.48287 | 0.72299  |
| H | 1.17815  | 0.79049  | -0.43856 |

There are no imaginary frequencies.

SCF energy: -586.986776 hartree  
 $\alpha\alpha/\beta\beta$ : -0.238331993 hartree  
 $\alpha\beta$ : -1.3298323 hartree  
SCS-MP2 energy: -588.7414628 hartree  
zero-point correction: +0.234289 hartree  
enthalpy correction: +0.248192 hartree  
free energy correction: +0.194068 hartree  
quasiharmonic free energy correction: +0.195747 hartree

**S-108**

|   |          |          |          |
|---|----------|----------|----------|
| C | -1.77362 | 0.43076  | 0.02726  |
| C | -0.65860 | -1.72706 | -0.06838 |
| C | -2.98581 | -0.22115 | 0.14843  |
| C | -0.57076 | -0.32454 | -0.07877 |
| N | 0.59174  | 0.35466  | -0.18772 |
| N | 1.78729  | -0.32261 | -0.27830 |
| C | 2.83491  | 0.43043  | -0.35577 |
| C | 4.19210  | -0.17520 | -0.43770 |
| H | 0.58174  | 1.37753  | -0.18036 |
| H | 2.75060  | 1.52299  | -0.34292 |
| H | 4.68687  | 0.19696  | -1.34302 |
| H | 4.09259  | -1.26049 | -0.53213 |

|   |          |          |          |
|---|----------|----------|----------|
| C | 5.03435  | 0.18794  | 0.78821  |
| H | 4.57807  | -0.20738 | 1.69988  |
| H | 6.04063  | -0.23021 | 0.69714  |
| H | 5.12482  | 1.27296  | 0.89326  |
| H | 0.23252  | -2.33576 | -0.15055 |
| O | -1.60549 | 1.77593  | 0.00255  |
| C | -2.80489 | 2.58034  | 0.04412  |
| H | -2.45546 | 3.60904  | -0.01051 |
| H | -3.44363 | 2.34978  | -0.81187 |
| H | -3.34266 | 2.41332  | 0.98050  |
| C | -1.89137 | -2.33163 | 0.05064  |
| H | -2.02795 | -3.40618 | 0.06430  |
| N | -3.00468 | -1.58019 | 0.15569  |
| H | -3.94359 | 0.27380  | 0.23815  |
| H | -3.90887 | -2.04616 | 0.24180  |

There are no imaginary frequencies.

SCF energy: -587.008733 hartree  
 $\alpha\alpha/\beta\beta$ : -0.237610018 hartree  
 $\alpha\beta$ : -1.3307522 hartree  
SCS-MP2 energy: -588.7640424 hartree  
zero-point correction: +0.232738 hartree  
enthalpy correction: +0.247101 hartree  
free energy correction: +0.191395 hartree  
quasiharmonic free energy correction: +0.193800 hartree

**S-109**

|   |          |          |          |
|---|----------|----------|----------|
| C | -0.99163 | -0.58419 | 0.24839  |
| C | -1.28182 | 1.81617  | 0.04631  |
| C | -1.90963 | -0.72812 | -0.80122 |
| C | -0.69844 | 0.72001  | 0.66146  |
| N | 0.28959  | 0.89875  | 1.71903  |
| N | 1.65708  | 1.22312  | 1.25691  |
| C | 2.12779  | 0.20612  | 0.37138  |
| C | 2.40274  | 0.45062  | -0.91744 |
| H | 0.36527  | 0.03682  | 2.28573  |
| H | -1.05263 | 2.83018  | 0.36504  |
| H | -2.18825 | -1.71053 | -1.16798 |
| H | 1.54099  | 2.10368  | 0.74106  |
| H | 2.32619  | -0.74855 | 0.85141  |
| H | 2.17417  | 1.43608  | -1.32449 |
| H | 0.01001  | 1.65928  | 2.36042  |
| C | 3.04552  | -0.54547 | -1.82715 |
| H | 4.02529  | -0.19090 | -2.16481 |
| H | 3.18007  | -1.50841 | -1.32696 |
| H | 2.43278  | -0.69793 | -2.72142 |
| O | -0.36585 | -1.58322 | 0.91830  |
| C | -0.70205 | -2.93675 | 0.53319  |
| H | -0.44012 | -3.10939 | -0.51284 |
| H | -0.09873 | -3.56879 | 1.18154  |
| H | -1.76474 | -3.12439 | 0.70080  |
| N | -2.49003 | 0.32198  | -1.41287 |
| C | -2.17782 | 1.56269  | -0.99031 |

H -2.66786 2.38528 -1.50301

There are no imaginary frequencies.

SCF energy: -586.958781 hartree  
 $\alpha/\beta$ : -0.239494444 hartree  
 $\alpha\beta$ : -1.3359873 hartree  
SCS-MP2 energy: -588.7216287 hartree  
zero-point correction: +0.234586 hartree  
enthalpy correction: +0.248535 hartree  
free energy correction: +0.194397 hartree  
quasiharmonic free energy correction: +0.196330 hartree

**S-110**

|   |          |          |          |
|---|----------|----------|----------|
| C | -1.00233 | 0.57961  | -0.15771 |
| C | -1.27430 | -1.78964 | -0.46265 |
| C | -1.96681 | 0.51284  | 0.85090  |
| C | -0.63141 | -0.60753 | -0.81336 |
| N | 0.28599  | -0.55226 | -1.89773 |
| N | 1.56099  | 0.04779  | -1.48185 |
| C | 2.21847  | -0.60894 | -0.35771 |
| C | 2.28209  | 0.00641  | 0.82491  |
| H | 0.52074  | -1.50206 | -2.20832 |
| H | -1.01131 | -2.72344 | -0.95425 |
| H | -2.27056 | 1.40300  | 1.39230  |
| H | 2.15658  | 0.04631  | -2.32498 |
| H | 2.59093  | -1.60148 | -0.58901 |
| H | 1.86417  | 1.00761  | 0.92659  |
| H | 1.33581  | 1.03406  | -1.25422 |
| C | 2.92076  | -0.60754 | 2.02533  |
| H | 2.19523  | -0.67962 | 2.84177  |
| H | 3.30544  | -1.60619 | 1.80539  |
| H | 3.74523  | 0.01976  | 2.37805  |
| O | -0.35622 | 1.71312  | -0.56781 |
| C | -0.58406 | 2.91421  | 0.20413  |
| H | -0.32260 | 2.74899  | 1.25162  |
| H | 0.07408  | 3.66001  | -0.23724 |
| H | -1.62531 | 3.23059  | 0.11381  |
| C | -2.24795 | -1.75317 | 0.53338  |
| H | -2.76548 | -2.66371 | 0.82380  |
| N | -2.59413 | -0.63214 | 1.19299  |

There are no imaginary frequencies.

SCF energy: -586.966168 hartree  
 $\alpha/\beta$ : -0.23975087 hartree  
 $\alpha\beta$ : -1.3359893 hartree  
SCS-MP2 energy: -588.729189 hartree  
zero-point correction: +0.234903 hartree  
enthalpy correction: +0.248762 hartree  
free energy correction: +0.195097 hartree  
quasiharmonic free energy correction: +0.196750 hartree

**S-111**

|   |          |          |          |
|---|----------|----------|----------|
| C | -1.38120 | 0.44207  | -0.15221 |
| C | -0.51239 | -1.82160 | -0.19701 |
| C | -2.47115 | -0.00823 | 0.57225  |
| C | -0.36786 | -0.47320 | -0.54792 |
| N | 0.65792  | -0.00356 | -1.31838 |
| N | 1.82980  | -0.77846 | -1.35568 |
| C | 2.82938  | -0.36661 | -0.43799 |
| C | 2.64045  | 0.40344  | 0.64519  |
| H | 0.80664  | 1.00841  | -1.26422 |
| H | 2.18229  | -0.79786 | -2.31243 |
| H | 3.80064  | -0.79954 | -0.67022 |
| H | 1.65785  | 0.81839  | 0.86182  |
| C | 3.74732  | 0.72460  | 1.60375  |
| H | 3.51146  | 0.37501  | 2.61501  |
| H | 4.68567  | 0.25544  | 1.29360  |
| H | 3.91375  | 1.80539  | 1.67074  |
| H | -3.28037 | 0.61875  | 0.92281  |
| O | -1.16501 | 1.72832  | -0.51841 |
| C | -2.12610 | 2.70328  | -0.05532 |
| H | -1.75796 | 3.65805  | -0.42450 |
| H | -3.11263 | 2.49107  | -0.47415 |
| H | -2.16372 | 2.70691  | 1.03661  |
| N | -2.55274 | -1.32809 | 0.87799  |
| C | -1.61805 | -2.22909 | 0.52102  |
| H | -1.79056 | -3.25479 | 0.82382  |
| H | 0.24332  | -2.54290 | -0.48145 |
| H | -3.36358 | -1.64603 | 1.41168  |

There are no imaginary frequencies.

SCF energy: -586.987534 hartree  
 $\alpha/\beta$ : -0.238034144 hartree  
 $\alpha\beta$ : -1.3294062 hartree  
SCS-MP2 energy: -588.7415109 hartree  
zero-point correction: +0.233774 hartree  
enthalpy correction: +0.247762 hartree  
free energy correction: +0.193766 hartree  
quasiharmonic free energy correction: +0.195588 hartree

**TS S-112**

|   |          |          |          |
|---|----------|----------|----------|
| C | -1.36878 | 0.18013  | 0.13262  |
| C | 0.78527  | 0.62930  | 1.16479  |
| C | -1.42426 | 1.52064  | -0.22212 |
| C | -0.28400 | -0.25537 | 0.93995  |
| N | -0.13636 | -1.59443 | 1.18300  |
| N | 0.97569  | -2.27364 | -0.24491 |
| C | 2.00455  | -1.39901 | -0.27025 |
| C | 1.94758  | -0.16965 | -0.90055 |
| H | 1.60882  | 0.34126  | 1.81328  |
| H | -2.25666 | 1.91916  | -0.79168 |
| H | 0.27808  | -1.97941 | -0.94547 |
| H | 2.86814  | -1.64981 | 0.34478  |



|   |          |          |          |
|---|----------|----------|----------|
| H | 1.06873  | 0.04444  | -1.51340 |
| H | 0.46143  | -1.86923 | 1.96843  |
| C | 3.11973  | 0.73357  | -1.03886 |
| H | 2.81194  | 1.78116  | -0.98512 |
| H | 3.87843  | 0.53124  | -0.27920 |
| H | 3.56774  | 0.58299  | -2.02982 |
| H | -0.97024 | -2.18175 | 1.07308  |
| O | -2.27387 | -0.78153 | -0.17040 |
| C | -3.41440 | -0.37251 | -0.95991 |
| H | -3.08490 | 0.01986  | -1.92456 |
| H | -3.99929 | -1.27915 | -1.09943 |
| H | -3.99809 | 0.37672  | -0.42061 |
| C | 0.60894  | 1.97950  | 0.78872  |
| H | 1.37594  | 2.71063  | 1.02925  |
| N | -0.44889 | 2.41444  | 0.10725  |

1 imaginary frequency:  $-269.50\text{ cm}^{-1}$ .

SCF energy: -586.909713 hartree  
 $\alpha\alpha/\beta\beta$ : -0.246699343 hartree  
 $\alpha\beta$ : -1.3532931 hartree  
SCS-MP2 energy: -588.698131 hartree  
zero-point correction: +0.232390 hartree  
enthalpy correction: +0.245674 hartree  
free energy correction: +0.194155 hartree  
quasiharmonic free energy correction: +0.194847 hartree

#### TS S-113

|   |          |          |          |
|---|----------|----------|----------|
| C | -1.35045 | 0.12383  | 0.13450  |
| C | 0.72055  | 0.68395  | 1.26003  |
| C | -1.46458 | 1.46728  | -0.20808 |
| C | -0.26710 | -0.28489 | 0.97274  |
| N | -0.04861 | -1.57735 | 1.33767  |
| N | 1.11303  | -2.18672 | -0.07569 |
| C | 2.11646  | -1.28043 | -0.25099 |
| C | 1.88219  | -0.14049 | -0.97384 |
| H | 1.55163  | 0.41660  | 1.90766  |
| H | -2.29438 | 1.82782  | -0.80711 |
| H | 0.39757  | -2.24395 | -0.80980 |
| H | 3.00805  | -1.43083 | 0.34884  |
| H | 0.95548  | -0.07100 | -1.54506 |
| H | -0.85967 | -2.14015 | 1.03555  |
| C | 2.91632  | 0.90364  | -1.20069 |
| H | 2.47792  | 1.90090  | -1.10270 |
| H | 3.75183  | 0.80062  | -0.50503 |
| H | 3.29362  | 0.81646  | -2.22640 |
| H | 1.35640  | -3.09135 | 0.33851  |
| O | -2.21273 | -0.86417 | -0.21751 |
| C | -3.35865 | -0.47799 | -1.00617 |
| H | -3.04020 | -0.05356 | -1.96123 |
| H | -3.91216 | -1.40050 | -1.17094 |
| H | -3.97342 | 0.23872  | -0.45660 |
| N | -0.55380 | 2.40812  | 0.15468  |
| C | 0.50416  | 2.01357  | 0.87759  |

|   |         |         |         |
|---|---------|---------|---------|
| H | 1.22150 | 2.78447 | 1.14717 |
|---|---------|---------|---------|

1 imaginary frequency:  $-352.63\text{ cm}^{-1}$ .

SCF energy: -586.905149 hartree  
 $\alpha\alpha/\beta\beta$ : -0.247119758 hartree  
 $\alpha\beta$ : -1.3585053 hartree  
SCS-MP2 energy: -588.7001019 hartree  
zero-point correction: +0.231717 hartree  
enthalpy correction: +0.245174 hartree  
free energy correction: +0.192953 hartree  
quasiharmonic free energy correction: +0.194097 hartree

#### TS S-114

|   |          |          |          |
|---|----------|----------|----------|
| C | -1.39315 | 0.12223  | 0.14537  |
| C | 0.85317  | 0.50961  | 1.02324  |
| C | -1.46148 | 1.45310  | -0.22515 |
| C | -0.27361 | -0.36169 | 0.90417  |
| N | -0.12255 | -1.64503 | 1.28044  |
| N | 0.94599  | -2.28665 | -0.32981 |
| C | 1.99749  | -1.45753 | -0.28732 |
| C | 1.99516  | -0.15465 | -0.78800 |
| H | 1.65062  | 0.23756  | 1.70717  |
| H | -2.28035 | 1.92159  | -0.75331 |
| H | 0.25205  | -1.89051 | -0.98272 |
| H | 2.83584  | -1.77559 | 0.33442  |
| H | 1.18835  | 0.11078  | -1.47599 |
| H | -0.96579 | -2.17515 | 1.01879  |
| C | 3.24297  | 0.66871  | -0.85012 |
| H | 3.01626  | 1.73743  | -0.86661 |
| H | 3.90210  | 0.45310  | -0.00461 |
| H | 3.78566  | 0.43637  | -1.77465 |
| O | -2.35209 | -0.79190 | -0.09922 |
| C | -3.50430 | -0.35151 | -0.85550 |
| H | -3.19173 | 0.01752  | -1.83516 |
| H | -4.12456 | -1.23835 | -0.96392 |
| H | -4.04221 | 0.42413  | -0.30578 |
| N | -0.40743 | 2.26944  | 0.08993  |
| C | 0.69777  | 1.87541  | 0.70976  |
| H | 1.44768  | 2.63079  | 0.91303  |
| H | -0.49334 | 3.25906  | -0.15955 |

1 imaginary frequency:  $-254.15\text{ cm}^{-1}$ .

SCF energy: -586.895213 hartree  
 $\alpha\alpha/\beta\beta$ : -0.248444455 hartree  
 $\alpha\beta$ : -1.3604148 hartree  
SCS-MP2 energy: -588.6933404 hartree  
zero-point correction: +0.232185 hartree  
enthalpy correction: +0.245396 hartree  
free energy correction: +0.193999 hartree  
quasiharmonic free energy correction: +0.194845 hartree

**S-115**

|   |          |          |          |
|---|----------|----------|----------|
| C | 1.51112  | -0.13669 | -0.11882 |
| C | -0.85136 | 0.57802  | -0.68099 |
| C | 1.87377  | 1.17789  | -0.14871 |
| C | 0.15452  | -0.49981 | -0.45599 |
| N | -0.17127 | -1.75278 | -0.54737 |
| N | -2.93907 | -1.40211 | -0.59515 |
| C | -3.03388 | -0.42284 | 0.23082  |
| C | -1.96964 | 0.62094  | 0.40780  |
| H | -1.34743 | 0.38659  | -1.64541 |
| H | 2.88574  | 1.48779  | 0.08491  |
| H | -3.77985 | -1.98730 | -0.54918 |
| H | -3.91098 | -0.28175 | 0.87135  |
| H | -2.47747 | 1.58654  | 0.27523  |
| C | -1.40453 | 0.57754  | 1.83165  |
| H | -2.20908 | 0.73812  | 2.55483  |
| H | -0.94340 | -0.39137 | 2.04386  |
| H | -0.65794 | 1.36495  | 1.97143  |
| O | 2.29530  | -1.20275 | 0.16638  |
| C | 3.67266  | -0.91448 | 0.49521  |
| H | 3.72323  | -0.28864 | 1.38923  |
| H | 4.12485  | -1.88555 | 0.68493  |
| H | 4.16683  | -0.42189 | -0.34552 |
| C | -0.22971 | 1.93532  | -0.74117 |
| H | -0.89999 | 2.75578  | -0.99728 |
| N | 1.00450  | 2.22986  | -0.49208 |
| H | 0.52581  | -2.48051 | -0.38144 |
| H | -1.15945 | -1.98088 | -0.76449 |

There are no imaginary frequencies.

SCF energy: -586.997441 hartree  
 $\alpha/\beta$ : -0.236306265 hartree  
 $\alpha\beta$ : -1.3347987 hartree  
SCS-MP2 energy: -588.7567369 hartree  
zero-point correction: +0.233238 hartree  
enthalpy correction: +0.246941 hartree  
free energy correction: +0.194448 hartree  
quasi-harmonic free energy correction: +0.195315 hartree

**S-116**

|   |          |          |          |
|---|----------|----------|----------|
| C | 1.49606  | -0.15774 | -0.13414 |
| C | -0.84195 | 0.61845  | -0.72296 |
| C | 1.88694  | 1.14352  | -0.08954 |
| C | 0.14504  | -0.51505 | -0.57882 |
| N | -0.23048 | -1.72530 | -0.82864 |
| N | -2.95085 | -1.43890 | -0.34396 |
| C | -3.01651 | -0.32262 | 0.28780  |
| C | -1.90775 | 0.66276  | 0.40620  |
| H | 0.53762  | -2.38536 | -0.65709 |
| H | -1.37134 | 0.49304  | -1.67879 |
| H | 2.88333  | 1.43663  | 0.21899  |
| H | -3.95135 | -0.09687 | 0.79719  |

|   |          |          |          |
|---|----------|----------|----------|
| H | -2.40150 | 1.64159  | 0.34454  |
| C | -1.29875 | 0.53275  | 1.81390  |
| H | -2.06547 | 0.68958  | 2.57748  |
| H | -0.86035 | -0.45815 | 1.95721  |
| H | -0.52274 | 1.29195  | 1.94255  |
| O | 2.25645  | -1.24323 | 0.16910  |
| C | 3.61502  | -0.97506 | 0.56896  |
| H | 3.63134  | -0.37382 | 1.48167  |
| H | 4.05638  | -1.95269 | 0.75378  |
| H | 4.15301  | -0.46132 | -0.23194 |
| N | 1.05213  | 2.22172  | -0.46467 |
| C | -0.17999 | 1.96659  | -0.75545 |
| H | -0.81366 | 2.80934  | -1.03567 |
| H | -3.75830 | -2.06555 | -0.35255 |
| H | -2.05296 | -1.74676 | -0.78499 |

There are no imaginary frequencies.

SCF energy: -586.993797 hartree  
 $\alpha/\beta$ : -0.236071281 hartree  
 $\alpha\beta$ : -1.3367736 hartree  
SCS-MP2 energy: -588.7553061 hartree  
zero-point correction: +0.233936 hartree  
enthalpy correction: +0.247507 hartree  
free energy correction: +0.195183 hartree  
quasi-harmonic free energy correction: +0.196294 hartree

**S-117**

|   |          |          |          |
|---|----------|----------|----------|
| C | 1.62602  | -0.05931 | -0.15681 |
| C | -0.84905 | 0.00415  | -0.70828 |
| C | 1.63809  | 1.29608  | -0.08865 |
| C | 0.35386  | -0.80438 | -0.27032 |
| N | 0.25623  | -2.07533 | -0.09853 |
| N | -1.57412 | 0.31268  | 1.83753  |
| C | -2.37104 | -0.44936 | 1.18004  |
| C | -2.18165 | -0.62952 | -0.29598 |
| H | 1.18779  | -2.45281 | 0.11986  |
| H | -0.81387 | 0.03314  | -1.81579 |
| H | -3.21728 | -0.97275 | 1.63705  |
| H | -2.10607 | -1.70259 | -0.50048 |
| H | -1.85039 | 0.36220  | 2.82544  |
| C | -3.38517 | -0.08071 | -1.06979 |
| H | -4.29521 | -0.59990 | -0.75482 |
| H | -3.53263 | 0.98903  | -0.89518 |
| H | -3.25069 | -0.24580 | -2.14236 |
| H | 2.50910  | 1.92664  | 0.01817  |
| O | 2.71023  | -0.85571 | -0.07536 |
| C | 3.97851  | -0.19660 | 0.13675  |
| H | 3.95899  | 0.36035  | 1.07666  |
| H | 4.71147  | -0.99900 | 0.18270  |
| H | 4.19875  | 0.47190  | -0.69883 |
| C | -0.74890 | 1.42821  | -0.31011 |
| N | 0.40729  | 1.98389  | -0.12613 |
| H | -1.61033 | 2.08704  | -0.30967 |

H 0.43866 2.98818 0.06896

There are no imaginary frequencies.

SCF energy: -586.989022 hartree  
 $\alpha\alpha/\beta\beta$ : -0.235468189 hartree  
 $\alpha\beta$ : -1.3355961 hartree  
SCS-MP2 energy: -588.7487161 hartree  
enthalpy correction: +0.247761 hartree  
free energy correction: +0.195664 hartree  
quasiharmonic free energy correction: +0.196441 hartree

**2-hydrazinyl-5-methoxypyridine (39)**

**S-118**

|   |          |          |          |
|---|----------|----------|----------|
| C | 1.04053  | -1.47422 | -0.30925 |
| C | 2.54159  | 0.34332  | 0.12773  |
| C | 2.29942  | -0.89565 | -0.47722 |
| C | 0.11843  | -0.78172 | 0.45599  |
| N | -1.24115 | -1.30694 | 0.62076  |
| N | -2.13043 | -0.71026 | -0.38380 |
| C | -2.90258 | 0.18616  | 0.12228  |
| C | -3.85522 | 0.91205  | -0.75857 |
| H | -1.57316 | -1.13477 | 1.58763  |
| H | 3.05271  | -1.40772 | -1.06519 |
| H | 0.79638  | -2.43415 | -0.75630 |
| H | -2.89923 | 0.42824  | 1.18904  |
| H | -3.61743 | 1.98049  | -0.69484 |
| H | -1.25572 | -2.32665 | 0.45876  |
| H | -3.70899 | 0.59183  | -1.79350 |
| C | -5.29781 | 0.67525  | -0.30502 |
| H | -5.55591 | -0.38464 | -0.37460 |
| H | -5.44211 | 0.99962  | 0.72917  |
| H | -5.98487 | 1.24038  | -0.93952 |
| O | 3.70413  | 1.04289  | 0.05707  |
| C | 4.74178  | 0.48934  | -0.77784 |
| H | 4.39313  | 0.39283  | -1.80903 |
| H | 5.55896  | 1.20641  | -0.72499 |
| H | 5.06979  | -0.48013 | -0.39489 |
| C | 1.52140  | 0.94780  | 0.88514  |
| H | 1.70346  | 1.90674  | 1.36343  |
| N | 0.31225  | 0.39783  | 1.04718  |

There are no imaginary frequencies.

SCF energy: -586.987213 hartree  
 $\alpha\alpha/\beta\beta$ : -0.238030299 hartree  
 $\alpha\beta$ : -1.332850124 hartree  
SCS-MP2 energy: -588.74532 hartree  
zero-point correction: +0.233910 hartree  
enthalpy correction: +0.247923 hartree  
free energy correction: +0.192855 hartree  
quasiharmonic free energy correction: +0.195285 hartree

**S-119**

|   |          |          |          |
|---|----------|----------|----------|
| C | 0.82023  | 1.62533  | -0.00681 |
| C | 2.79295  | 0.24555  | 0.03137  |
| C | 2.19768  | 1.51587  | 0.08324  |
| C | 0.08960  | 0.44226  | -0.14614 |
| N | -1.32590 | 0.50645  | -0.31123 |
| N | -1.95865 | -0.67853 | -0.01915 |
| C | -3.23182 | -0.83068 | 0.12019  |
| C | -4.18790 | 0.29749  | 0.03223  |
| H | -1.76572 | 1.29827  | 0.16574  |
| H | 2.82589  | 2.39492  | 0.19869  |
| H | 0.32318  | 2.59053  | 0.03857  |
| H | -3.54397 | -1.85407 | 0.30718  |
| H | -4.00168 | 0.82603  | -0.91300 |
| H | -3.95262 | 1.01457  | 0.83182  |
| C | -5.63547 | -0.16620 | 0.13425  |
| H | -5.81943 | -0.65536 | 1.09389  |
| H | -6.30646 | 0.69159  | 0.05294  |
| H | -5.87688 | -0.86791 | -0.66774 |
| O | 4.15534  | 0.21503  | 0.13486  |
| C | 4.77186  | -1.08554 | 0.10208  |
| H | 4.57900  | -1.58373 | -0.85177 |
| H | 5.83858  | -0.89743 | 0.21277  |
| H | 4.41515  | -1.70482 | 0.92951  |
| N | 0.63050  | -0.77141 | -0.20789 |
| C | 1.97486  | -0.87841 | -0.11091 |
| H | 2.37085  | -1.88668 | -0.15688 |
| H | -1.30216 | -1.47579 | 0.01041  |

There are no imaginary frequencies.

SCF energy: -586.993574 hartree  
 $\alpha\alpha/\beta\beta$ : -0.238219938 hartree  
 $\alpha\beta$ : -1.328954619 hartree  
SCS-MP2 energy: -588.7471328 hartree  
zero-point correction: +0.233089 hartree  
enthalpy correction: +0.247089 hartree  
free energy correction: +0.192806 hartree  
quasiharmonic free energy correction: +0.194466 hartree

**S-120**

|   |          |          |          |
|---|----------|----------|----------|
| C | 1.07905  | 1.79185  | 0.05301  |
| C | 2.80013  | 0.08472  | 0.03573  |
| C | 2.40920  | 1.44177  | 0.05860  |
| C | 0.09963  | 0.78086  | 0.01446  |
| N | -1.23448 | 1.03936  | 0.05461  |
| N | -2.09942 | -0.01831 | -0.14163 |
| C | -3.33969 | 0.29443  | -0.31478 |
| C | -4.36216 | -0.77163 | -0.49929 |
| H | -1.55074 | 1.99785  | -0.11594 |
| H | 0.76778  | 2.83139  | 0.07064  |
| H | -3.66423 | 1.34051  | -0.31320 |

|   |          |          |          |
|---|----------|----------|----------|
| H | -3.85986 | -1.74195 | -0.55158 |
| H | -4.86885 | -0.60445 | -1.45747 |
| C | -5.39192 | -0.75308 | 0.63356  |
| H | -5.88809 | 0.21959  | 0.69659  |
| H | -6.15766 | -1.51520 | 0.46526  |
| H | -4.91099 | -0.95514 | 1.59457  |
| H | 3.18098  | 2.20644  | 0.08279  |
| O | 4.13764  | -0.15574 | 0.04939  |
| C | 4.53228  | -1.54181 | 0.00547  |
| H | 4.17120  | -2.01352 | -0.91250 |
| H | 5.62037  | -1.52871 | 0.01738  |
| H | 4.15217  | -2.07492 | 0.88116  |
| C | 1.82093  | -0.89185 | -0.00121 |
| N | 0.51262  | -0.49927 | -0.01122 |
| H | 1.98619  | -1.96038 | -0.02616 |
| H | -0.21502 | -1.21961 | -0.05220 |

There are no imaginary frequencies.

SCF energy: -587.006561 hartree  
 $\alpha\alpha/\beta\beta$ : -0.237073384 hartree  
 $\alpha\beta$ : -1.329621258 hartree  
SCS-MP2 energy: -588.7601554 hartree  
zero-point correction: +0.232700 hartree  
enthalpy correction: +0.246907 hartree  
free energy correction: +0.192551 hartree  
quasiharmonic free energy correction: +0.193844 hartree

**S-121**

|   |          |          |          |
|---|----------|----------|----------|
| C | -0.89410 | -1.15115 | 0.36889  |
| C | -2.77300 | 0.27774  | -0.05246 |
| C | -2.24542 | -1.01559 | 0.05352  |
| C | -0.16672 | 0.01123  | 0.56615  |
| N | 1.26301  | -0.07177 | 0.86103  |
| N | 2.03344  | -0.39089 | -0.34803 |
| C | 3.42171  | -0.48148 | -0.01836 |
| C | 4.35267  | 0.29607  | -0.58687 |
| H | 1.58016  | 0.81704  | 1.29064  |
| H | -2.85317 | -1.89953 | -0.10228 |
| H | -0.43225 | -2.12989 | 0.46398  |
| H | 1.87354  | 0.41203  | -0.96793 |
| H | 3.66281  | -1.29542 | 0.66223  |
| H | 4.03467  | 1.09114  | -1.26196 |
| H | 1.45060  | -0.82989 | 1.53773  |
| C | 5.82055  | 0.10814  | -0.37526 |
| H | 6.31833  | -0.16388 | -1.31217 |
| H | 6.01580  | -0.67857 | 0.35848  |
| H | 6.28161  | 1.03659  | -0.02342 |
| O | -4.06288 | 0.58153  | -0.35303 |
| C | -4.95129 | -0.52876 | -0.59475 |
| H | -5.02979 | -1.16059 | 0.29334  |
| H | -5.91575 | -0.07532 | -0.81601 |
| H | -4.60794 | -1.11555 | -1.45027 |
| N | -0.63158 | 1.25778  | 0.47157  |

|   |          |         |         |
|---|----------|---------|---------|
| C | -1.93065 | 1.38138 | 0.16743 |
| H | -2.33209 | 2.38833 | 0.09012 |

There are no imaginary frequencies.

SCF energy: -586.969404 hartree  
 $\alpha\alpha/\beta\beta$ : -0.238151547 hartree  
 $\alpha\beta$ : -1.332457622 hartree  
SCS-MP2 energy: -588.7271208 hartree  
zero-point correction: +0.234156 hartree  
enthalpy correction: +0.248359 hartree  
free energy correction: +0.192384 hartree  
quasiharmonic free energy correction: +0.195536 hartree

**S-122**

|   |          |          |          |
|---|----------|----------|----------|
| C | -1.07109 | 1.40426  | 0.07115  |
| C | -2.77775 | -0.28275 | 0.00867  |
| C | -2.42184 | 1.07203  | -0.00182 |
| C | -0.14033 | 0.37253  | 0.15954  |
| N | 1.24436  | 0.66258  | 0.36996  |
| N | 2.07689  | -0.36121 | -0.23234 |
| C | 3.42756  | -0.31553 | 0.31439  |
| C | 4.45935  | -0.01848 | -0.47555 |
| H | 1.51293  | 1.54965  | -0.06667 |
| H | -3.16486 | 1.85882  | -0.07372 |
| H | -0.75111 | 2.44269  | 0.05397  |
| H | 1.59713  | -1.25332 | -0.00671 |
| H | 3.46614  | -0.53576 | 1.37477  |
| H | 4.28167  | 0.18908  | -1.53051 |
| H | 2.08889  | -0.28007 | -1.26530 |
| C | 5.86753  | 0.03959  | 0.01567  |
| H | 6.29150  | 1.03071  | -0.17273 |
| H | 5.92556  | -0.17172 | 1.08586  |
| H | 6.48590  | -0.68623 | -0.52135 |
| O | -4.05339 | -0.76929 | -0.06090 |
| C | -5.10463 | 0.20756  | -0.17522 |
| H | -4.98300 | 0.80364  | -1.08345 |
| H | -6.02526 | -0.37113 | -0.23120 |
| H | -5.12840 | 0.85879  | 0.70262  |
| C | -1.76454 | -1.24590 | 0.08216  |
| H | -2.01918 | -2.30290 | 0.07637  |
| N | -0.46359 | -0.92676 | 0.16971  |

There are no imaginary frequencies.

SCF energy: -586.975350 hartree  
 $\alpha\alpha/\beta\beta$ : -0.238152611 hartree  
 $\alpha\beta$ : -1.331599539 hartree  
SCS-MP2 energy: -588.7320379 hartree  
zero-point correction: +0.234273 hartree  
enthalpy correction: +0.248341 hartree  
free energy correction: +0.193781 hartree  
quasiharmonic free energy correction: +0.195654 hartree

**S-123**

|   |          |          |          |
|---|----------|----------|----------|
| C | 0.53361  | -1.30857 | 1.16390  |
| C | 2.36431  | 0.00386  | 0.26678  |
| C | 1.81233  | -0.80966 | 1.27941  |
| C | -0.22890 | -0.98623 | 0.02854  |
| N | -1.47874 | -1.50791 | -0.21931 |
| N | -2.21900 | -0.81760 | -1.19906 |
| C | -3.10912 | 0.17035  | -0.69835 |
| C | -3.03389 | 0.75960  | 0.50425  |
| H | -2.00328 | -1.73149 | 0.63317  |
| H | 0.09809  | -1.93369 | 1.93708  |
| H | -2.69640 | -1.49718 | -1.79032 |
| H | -3.85591 | 0.45746  | -1.43553 |
| H | -2.26673 | 0.46503  | 1.21812  |
| C | -3.97850 | 1.84454  | 0.92498  |
| H | -3.43953 | 2.76867  | 1.16107  |
| H | -4.70280 | 2.06506  | 0.13551  |
| H | -4.53243 | 1.55875  | 1.82574  |
| H | 2.41854  | -1.03781 | 2.15184  |
| O | 3.63252  | 0.44178  | 0.47175  |
| C | 4.18705  | 1.29293  | -0.55231 |
| H | 3.59182  | 2.20388  | -0.65615 |
| H | 5.18907  | 1.53761  | -0.20579 |
| H | 4.23891  | 0.76044  | -1.50553 |
| N | 0.33208  | -0.20779 | -0.90874 |
| C | 1.59212  | 0.30678  | -0.84352 |
| H | 1.89084  | 0.92201  | -1.68152 |
| H | -0.26474 | 0.01853  | -1.71402 |

There are no imaginary frequencies.

SCF energy: -586.986842 hartree  
 $\alpha\alpha/\beta\beta$ : -0.237625724 hartree  
 $\alpha\beta$ : -1.328652851 hartree  
SCS-MP2 energy: -588.7396426 hartree  
zero-point correction: +0.233058 hartree  
enthalpy correction: +0.247031 hartree  
free energy correction: +0.193263 hartree  
quasiharmonic free energy correction: +0.194603 hartree

**TS S-124**

|   |          |          |          |
|---|----------|----------|----------|
| C | 0.25449  | -0.06444 | 1.09870  |
| C | -1.77923 | -0.47073 | -0.08735 |
| C | -1.10507 | -1.52150 | -0.77497 |
| C | 0.79148  | -1.19360 | 0.45103  |
| N | 2.12196  | -1.48560 | 0.59576  |
| N | 3.10939  | -0.21746 | -0.47232 |
| C | 2.55610  | 0.96539  | -0.11239 |
| C | 1.34894  | 1.42193  | -0.59798 |
| H | 0.79748  | 0.39712  | 1.91904  |
| H | -1.64454 | -2.06989 | -1.54442 |
| H | 2.63118  | -0.55074 | -1.32291 |

|   |          |          |          |
|---|----------|----------|----------|
| H | 3.04546  | 1.49737  | 0.70315  |
| H | 0.88633  | 0.86124  | -1.41389 |
| H | 2.56413  | -1.26498 | 1.49220  |
| C | 0.78357  | 2.76197  | -0.28760 |
| H | -0.30330 | 2.70449  | -0.17189 |
| H | 1.22502  | 3.18785  | 0.61692  |
| H | 0.97987  | 3.44176  | -1.12655 |
| H | 2.44252  | -2.36794 | 0.18178  |
| O | -3.06962 | -0.29689 | -0.45698 |
| C | -3.78500 | 0.76682  | 0.20617  |
| H | -3.30561 | 1.72939  | 0.00970  |
| H | -4.78438 | 0.74853  | -0.22398 |
| H | -3.83543 | 0.57993  | 1.28154  |
| N | 0.14638  | -1.87802 | -0.53421 |
| C | -1.10262 | 0.24924  | 0.88578  |
| H | -1.56180 | 1.05808  | 1.44220  |

1 imaginary frequency: -282.80 cm<sup>-1</sup>.

SCF energy: -586.916572 hartree  
 $\alpha\alpha/\beta\beta$ : -0.246578738 hartree  
 $\alpha\beta$ : -1.353362083 hartree  
SCS-MP2 energy: -588.7049923 hartree  
zero-point correction: +0.232142 hartree  
enthalpy correction: +0.245327 hartree  
free energy correction: +0.194160 hartree  
quasiharmonic free energy correction: +0.194792 hartree

**TS S-125**

|   |          |          |          |
|---|----------|----------|----------|
| C | 0.21128  | -0.15744 | 1.15182  |
| C | -1.80098 | -0.47392 | -0.08760 |
| C | -1.12301 | -1.48501 | -0.81868 |
| C | 0.79770  | -1.21606 | 0.42054  |
| N | 2.09353  | -1.53714 | 0.67787  |
| N | 3.07109  | -0.21991 | -0.30881 |
| C | 2.55143  | 1.01817  | -0.03275 |
| C | 1.38731  | 1.41550  | -0.62503 |
| H | 0.75904  | 0.26578  | 1.98885  |
| H | -1.66266 | -1.99679 | -1.61398 |
| H | 2.90357  | -0.59408 | -1.24951 |
| H | 3.00198  | 1.54685  | 0.80085  |
| H | 0.98799  | 0.81798  | -1.44632 |
| H | 2.34287  | -2.32589 | 0.05964  |
| C | 0.74469  | 2.72866  | -0.34750 |
| H | -0.33576 | 2.60323  | -0.22451 |
| H | 1.15911  | 3.19596  | 0.54882  |
| H | 0.89755  | 3.39957  | -1.20047 |
| H | 4.00870  | -0.42313 | 0.04941  |
| O | -3.08764 | -0.26763 | -0.46268 |
| C | -3.79673 | 0.77830  | 0.23311  |
| H | -3.29683 | 1.73970  | 0.08776  |
| H | -4.78794 | 0.79842  | -0.21578 |
| H | -3.87174 | 0.54738  | 1.29849  |
| N | 0.13754  | -1.84228 | -0.60745 |

C -1.12623 0.19110 0.93209  
H -1.59257 0.96557 1.53086

**S-127**

1 imaginary frequency: -316.45 cm<sup>-1</sup>.  
SCF energy: -586.916775 hartree  
 $\alpha/\beta$ : -0.246294104 hartree  
 $\alpha\beta$ : -1.356296827 hartree  
SCS-MP2 energy: -588.7085273 hartree  
zero-point correction: +0.231209 hartree  
enthalpy correction: +0.244765 hartree  
free energy correction: +0.192325 hartree  
quasiharmonic free energy correction: +0.193494 hartree

C 0.48342 -0.20777 -0.59669  
C -1.88780 0.20756 -0.06550  
C -1.48001 1.48185 0.49117  
C 0.67701 1.22459 -0.20295  
N 1.80970 1.81079 -0.43628  
N 3.32647 -0.50603 -0.87701  
C 2.74576 -1.27652 -0.02780  
C 1.28764 -1.18453 0.31730  
H 0.88799 -0.31914 -1.61261  
H -2.24263 2.06912 1.00191  
H 4.31804 -0.75518 -0.95725  
H 3.28382 -2.06839 0.50460  
H 0.87197 -2.18251 0.11916  
C 1.10752 -0.88892 1.80912  
H 1.56196 -1.68572 2.40457  
H 1.58606 0.05576 2.08476  
H 0.04415 -0.83699 2.06123  
O -3.22969 -0.00172 0.04892  
C -3.69646 -1.26075 -0.47024  
H -3.23352 -2.09146 0.06955  
H -4.77252 -1.25871 -0.30677  
H -3.47613 -1.33822 -1.53859  
C -0.95428 -0.61416 -0.59935  
N -0.28260 1.99565 0.43438  
H -1.18469 -1.59905 -0.99332  
H 2.57252 1.25243 -0.85721  
H 1.94872 2.78094 -0.14933

**TS S-126**

C 0.32387 0.05790 1.02762  
C -1.76742 -0.45789 -0.06604  
C -1.13795 -1.58167 -0.65330  
C 0.89083 -1.16088 0.55833  
N 2.16209 -1.57195 0.65972  
N 3.05755 -0.29192 -0.60589  
C 2.56140 0.89750 -0.21343  
C 1.30628 1.38336 -0.55884  
H 0.83721 0.56379 1.83968  
H -1.65157 -2.23604 -1.34988  
H 2.47852 -0.64851 -1.37964  
H 3.13199 1.41978 0.55695  
H 0.78133 0.87247 -1.37070  
H 2.60448 -1.09704 1.45511  
C 0.85953 2.77286 -0.23398  
H 1.11120 3.44553 -1.06301  
H -0.22528 2.81672 -0.10040  
H 1.34778 3.14519 0.67109  
O -3.05912 -0.30400 -0.42842  
C -3.74278 0.84149 0.12614  
H -3.23672 1.76429 -0.16855  
H -4.74296 0.80445 -0.30022  
H -3.79325 0.76368 1.21453  
N 0.11527 -1.87142 -0.33945  
C -1.05315 0.32840 0.82394  
H -1.50258 1.18534 1.31385  
H 0.54479 -2.70702 -0.75477

There are no imaginary frequencies.

SCF energy: -587.006691 hartree  
 $\alpha/\beta$ : -0.235548593 hartree  
 $\alpha\beta$ : -1.331342446 hartree  
SCS-MP2 energy: -588.7613343 hartree  
zero-point correction: +0.233952 hartree  
enthalpy correction: +0.247360 hartree  
free energy correction: +0.195770 hartree  
quasiharmonic free energy correction: +0.196185 hartree

**S-128**

1 imaginary frequency: -207.86 cm<sup>-1</sup>.  
SCF energy: -586.896850 hartree  
 $\alpha/\beta$ : -0.248699516 hartree  
 $\alpha\beta$ : -1.360164178 hartree  
SCS-MP2 energy: -588.6948467 hartree  
zero-point correction: +0.232212 hartree  
enthalpy correction: +0.245320 hartree  
free energy correction: +0.194179 hartree  
quasiharmonic free energy correction: +0.195012 hartree

C 0.47377 -0.19038 -0.64646  
C -1.87903 0.20600 -0.04240  
C -1.44737 1.42922 0.62948  
C 0.68421 1.25373 -0.23745  
N 1.74967 1.86199 -0.62518  
N 3.41952 -0.40017 -0.63033  
C 2.71429 -1.29684 -0.03829  
C 1.25754 -1.19491 0.24088  
H 1.77089 2.81302 -0.23678  
H 0.86132 -0.28485 -1.67002  
H -2.19151 1.94943 1.23367

|   |          |          |          |
|---|----------|----------|----------|
| H | 3.23749  | -2.18881 | 0.30103  |
| H | 0.86102  | -2.19496 | 0.01854  |
| C | 1.08404  | -0.94994 | 1.74952  |
| H | 1.53815  | -1.76175 | 2.32395  |
| H | 1.55415  | -0.00849 | 2.04646  |
| H | 0.01737  | -0.91310 | 1.98542  |
| O | -3.22598 | 0.00956  | 0.07621  |
| C | -3.72024 | -1.20715 | -0.51002 |
| H | -3.26063 | -2.07599 | -0.03026 |
| H | -4.79370 | -1.20185 | -0.32848 |
| H | -3.51995 | -1.22405 | -1.58502 |
| N | -0.25569 | 1.93635  | 0.57562  |
| C | -0.97489 | -0.58396 | -0.66003 |
| H | -1.23445 | -1.52583 | -1.13384 |
| H | 4.42164  | -0.54846 | -0.76588 |
| H | 2.99760  | 0.50752  | -0.92064 |

There are no imaginary frequencies.

SCF energy: -587.002777 hartree  
 $\alpha\alpha/\beta\beta$ : -0.235551559 hartree  
 $\alpha\beta$ : -1.334526805 hartree  
SCS-MP2 energy: -588.7612435 hartree  
zero-point correction: +0.234700 hartree  
enthalpy correction: +0.247992 hartree  
free energy correction: +0.196686 hartree  
quasiharmonic free energy correction: +0.197167 hartree

### S-129

|   |          |          |          |
|---|----------|----------|----------|
| C | 0.53289  | -0.21932 | -0.61162 |
| C | -1.86939 | 0.17287  | -0.07068 |
| C | -1.51376 | 1.46867  | 0.44427  |
| C | 0.77536  | 1.23618  | -0.30316 |
| N | 1.81680  | 1.95107  | -0.49676 |
| N | 3.32949  | -0.61508 | -0.90655 |
| C | 2.76634  | -1.25324 | 0.05631  |
| C | 1.30254  | -1.14495 | 0.37547  |
| H | 2.52476  | 1.34943  | -0.94332 |
| H | 0.94746  | -0.40334 | -1.61091 |
| H | 3.31947  | -1.93491 | 0.71278  |
| H | 0.88823  | -2.15523 | 0.24097  |
| H | 4.32679  | -0.85562 | -0.93599 |
| C | 1.10747  | -0.74982 | 1.84150  |
| H | 1.56695  | -1.49754 | 2.49428  |
| H | 1.57468  | 0.21701  | 2.05303  |
| H | 0.04295  | -0.69193 | 2.08839  |
| H | -2.25718 | 2.09875  | 0.92573  |
| O | -3.20269 | -0.07022 | 0.05355  |
| C | -3.63762 | -1.35077 | -0.44386 |
| H | -3.43234 | -1.43288 | -1.51455 |
| H | -3.13958 | -2.15864 | 0.09906  |
| H | -4.71007 | -1.37779 | -0.26193 |
| C | -0.91115 | -0.61646 | -0.61598 |
| N | -0.30503 | 1.93118  | 0.33553  |

|   |          |          |          |
|---|----------|----------|----------|
| H | -1.14198 | -1.59915 | -1.01671 |
| H | -0.09363 | 2.87430  | 0.68164  |

There are no imaginary frequencies.

SCF energy: -586.988720 hartree  
 $\alpha\alpha/\beta\beta$ : -0.235237941 hartree  
 $\alpha\beta$ : -1.334807932 hartree  
SCS-MP2 energy: -588.7473148 hartree  
zero-point correction: +0.234947 hartree  
enthalpy correction: +0.248476 hartree  
free energy correction: +0.196472 hartree  
quasiharmonic free energy correction: +0.196965 hartree

### N $\alpha$ -methylated hydrazine

#### S-130

|   |          |          |          |
|---|----------|----------|----------|
| C | 1.54052  | 0.25571  | 1.11692  |
| C | 1.55042  | -0.37340 | -1.22638 |
| C | 3.17095  | -1.23002 | 0.15505  |
| C | 2.66261  | -0.55413 | 1.26612  |
| C | 0.99780  | 0.32791  | -0.16162 |
| N | -0.18493 | 1.15251  | -0.41528 |
| N | -1.29172 | 0.65745  | 0.41607  |
| C | -2.26351 | 0.19775  | -0.29192 |
| C | -3.46331 | -0.36529 | 0.38146  |
| H | -0.42772 | 1.07189  | -1.42147 |
| H | 1.11505  | -0.30719 | -2.22214 |
| H | 4.04715  | -1.86497 | 0.25578  |
| H | 3.14003  | -0.66335 | 2.23475  |
| H | 1.10895  | 0.79168  | 1.95712  |
| H | -2.23068 | 0.18661  | -1.38641 |
| H | -3.37661 | -0.21829 | 1.46111  |
| H | -4.33769 | 0.19294  | 0.02760  |
| C | -3.62128 | -1.84888 | 0.03664  |
| H | -3.70350 | -1.99407 | -1.04398 |
| H | -2.76371 | -2.42169 | 0.39885  |
| H | -4.52495 | -2.24520 | 0.50604  |
| N | 2.63735  | -1.15146 | -1.07968 |
| C | 0.02759  | 2.60494  | -0.11740 |
| H | 0.87979  | 2.93711  | -0.70989 |
| H | -0.88261 | 3.12889  | -0.40629 |
| H | 0.22082  | 2.70855  | 0.94788  |

There are no imaginary frequencies.

SCF energy: -512.132264 hartree  
 $\alpha\alpha/\beta\beta$ : -0.212699658 hartree  
 $\alpha\beta$ : -1.206693003 hartree  
SCS-MP2 energy: -513.7220954 hartree  
zero-point correction: +0.230105 hartree  
enthalpy correction: +0.242790 hartree  
free energy correction: +0.191504 hartree

quasiharmonic free energy correction: +0.192973 hartree

**S-131**

|   |          |          |          |
|---|----------|----------|----------|
| C | -2.19984 | 1.02515  | 0.24657  |
| C | -1.26406 | -1.08652 | -0.44480 |
| C | -3.46752 | -1.02096 | 0.20050  |
| C | -3.40251 | 0.34773  | 0.44484  |
| C | -1.10427 | 0.28505  | -0.20405 |
| N | 0.17236  | 0.87229  | -0.49607 |
| N | 1.16314  | 0.14897  | 0.21042  |
| C | 2.18473  | -0.36434 | -0.37958 |
| C | 3.25761  | -1.05496 | 0.36087  |
| H | -0.43009 | -1.67747 | -0.81808 |
| H | -4.39452 | -1.56750 | 0.35384  |
| H | -4.28138 | 0.88092  | 0.79506  |
| H | -2.13406 | 2.09010  | 0.44182  |
| H | 2.23868  | -0.23639 | -1.45823 |
| H | 3.37222  | -2.04730 | -0.08920 |
| H | 2.98347  | -1.17602 | 1.41213  |
| C | 4.56674  | -0.26560 | 0.21321  |
| H | 4.46864  | 0.73032  | 0.65109  |
| H | 5.36498  | -0.79917 | 0.73326  |
| H | 4.84536  | -0.16263 | -0.83822 |
| N | -2.41656 | -1.74415 | -0.24058 |
| H | 1.04802  | 0.06003  | 1.23345  |
| C | 0.32554  | 2.30161  | -0.17035 |
| H | -0.38278 | 2.85942  | -0.78241 |
| H | 0.15147  | 2.50921  | 0.89145  |
| H | 1.33892  | 2.59378  | -0.44558 |

There are no imaginary frequencies.

SCF energy: -512.137338 hartree  
 $\alpha\alpha/\beta\beta$ : -0.212176858 hartree  
 $\alpha\beta$ : -1.200282242 hartree  
SCS-MP2 energy: -513.7191279 hartree  
zero-point correction: +0.229684 hartree  
enthalpy correction: +0.242332 hartree  
free energy correction: +0.191476 hartree  
quasiharmonic free energy correction: +0.192647 hartree

**S-132**

|   |          |          |          |
|---|----------|----------|----------|
| C | -2.15714 | 1.04743  | 0.31703  |
| C | -1.27582 | -1.10561 | -0.31695 |
| C | -3.59920 | -0.88287 | 0.20232  |
| C | -3.41433 | 0.46955  | 0.44778  |
| C | -1.05030 | 0.26625  | -0.08671 |
| N | 0.20431  | 0.79518  | -0.26794 |
| N | 1.21823  | -0.13700 | -0.34222 |
| C | 2.44913  | 0.26111  | -0.28782 |
| C | 3.54005  | -0.75459 | -0.36962 |
| H | -2.03698 | 2.09780  | 0.55549  |

|   |          |          |          |
|---|----------|----------|----------|
| H | 2.74039  | 1.30382  | -0.15634 |
| H | 4.16998  | -0.52638 | -1.23866 |
| H | 3.09648  | -1.74180 | -0.53119 |
| C | 4.39968  | -0.74890 | 0.89609  |
| H | 3.79733  | -1.00745 | 1.77164  |
| H | 5.21261  | -1.47570 | 0.81179  |
| H | 4.84193  | 0.23754  | 1.06395  |
| N | -2.51574 | -1.59978 | -0.16164 |
| H | -2.63965 | -2.60061 | -0.34065 |
| H | -0.50656 | -1.80314 | -0.61389 |
| H | -4.26084 | 1.07173  | 0.75964  |
| H | -4.53764 | -1.41529 | 0.28702  |
| C | 0.46923  | 2.22636  | -0.19605 |
| H | -0.43121 | 2.76880  | -0.47624 |
| H | 0.79769  | 2.53681  | 0.80125  |
| H | 1.24105  | 2.47267  | -0.92763 |

There are no imaginary frequencies.

SCF energy: -512.136041 hartree  
 $\alpha\alpha/\beta\beta$ : -0.214849679 hartree  
 $\alpha\beta$ : -1.210455137 hartree  
SCS-MP2 energy: -513.7318203 hartree  
zero-point correction: +0.229078 hartree  
enthalpy correction: +0.242087 hartree  
free energy correction: +0.190168 hartree  
quasiharmonic free energy correction: +0.191596 hartree

**S-133**

|   |          |          |          |
|---|----------|----------|----------|
| C | -1.32777 | 0.16018  | -1.08285 |
| C | -1.11041 | -0.39860 | 1.26481  |
| C | -2.37455 | -1.76104 | -0.08270 |
| C | -2.12856 | -0.97118 | -1.20696 |
| C | -0.82968 | 0.43399  | 0.18699  |
| N | 0.05853  | 1.58121  | 0.40598  |
| N | 1.39978  | 1.42291  | -0.19317 |
| C | 2.01293  | 0.22925  | 0.29086  |
| C | 2.42020  | -0.75936 | -0.51742 |
| H | 0.24080  | 1.66043  | 1.42130  |
| H | -0.71395 | -0.18158 | 2.25535  |
| H | -2.99312 | -2.65088 | -0.16434 |
| H | -2.55321 | -1.24384 | -2.16793 |
| H | -1.10310 | 0.78621  | -1.94257 |
| H | 1.22795  | 1.35272  | -1.20352 |
| H | 2.20852  | 0.23445  | 1.36160  |
| H | 2.19227  | -0.69838 | -1.58187 |
| C | 3.20875  | -1.93595 | -0.03916 |
| H | 4.20246  | -1.95483 | -0.49922 |
| H | 3.33336  | -1.91258 | 1.04689  |
| H | 2.70909  | -2.87058 | -0.31380 |
| N | -1.88293 | -1.49261 | 1.14251  |
| C | -0.51431 | 2.89267  | -0.03321 |
| H | -1.48720 | 3.00258  | 0.44358  |
| H | 0.17613  | 3.66788  | 0.29279  |



H -0.60719 2.88808 -1.11769

**S-135**

There are no imaginary frequencies.

SCF energy: -512.113277 hartree  
 $\alpha/\beta$ : -0.213544162 hartree  
 $\alpha\beta$ : -1.207835007 hartree  
SCS-MP2 energy: -513.7050418 hartree  
zero-point correction: +0.229651 hartree  
enthalpy correction: +0.242656 hartree  
free energy correction: +0.189959 hartree  
quasiharmonic free energy correction: +0.192520 hartree

|   |          |          |          |
|---|----------|----------|----------|
| C | 2.13123  | 1.13341  | -0.11336 |
| C | 1.39071  | -1.15575 | -0.00162 |
| C | 3.72971  | -0.66893 | -0.01324 |
| C | 3.44804  | 0.68647  | -0.08408 |
| C | 1.06526  | 0.20950  | -0.07743 |
| N | -0.25929 | 0.59707  | -0.17555 |
| N | -1.15437 | -0.34610 | 0.41687  |
| C | -2.40338 | -0.37531 | -0.25122 |
| C | -3.58614 | -0.29192 | 0.37730  |
| H | 1.93829  | 2.19906  | -0.15842 |
| H | -1.28017 | -0.10628 | 1.40877  |
| H | -2.32629 | -0.55945 | -1.32088 |
| H | -3.60036 | -0.09630 | 1.45011  |
| C | -4.90138 | -0.49683 | -0.30778 |
| H | -5.56427 | 0.36093  | -0.15205 |
| H | -4.76555 | -0.63675 | -1.38421 |
| H | -5.42084 | -1.37787 | 0.08564  |
| N | 2.68401  | -1.52058 | 0.02417  |
| H | 0.65626  | -1.94789 | 0.03281  |
| H | 2.88271  | -2.52374 | 0.07840  |
| H | 4.26760  | 1.39656  | -0.10763 |
| H | 4.72122  | -1.10185 | 0.01992  |
| C | -0.59320 | 1.99818  | 0.09458  |
| H | -0.31489 | 2.29655  | 1.11356  |
| H | -0.10036 | 2.64789  | -0.62970 |
| H | -1.67089 | 2.10349  | -0.03367 |

**S-134**

|   |          |          |          |
|---|----------|----------|----------|
| C | -1.06016 | 0.26154  | 1.17936  |
| C | -1.37091 | 0.32680  | -1.20901 |
| C | -2.76931 | -0.99336 | 0.04101  |
| C | -2.14533 | -0.61302 | 1.22655  |
| C | -0.66903 | 0.74219  | -0.07129 |
| N | 0.40875  | 1.66747  | -0.28128 |
| N | 1.54462  | 0.92269  | -0.88411 |
| C | 2.09534  | -0.17495 | -0.09427 |
| C | 1.72414  | -1.43023 | -0.36079 |
| H | -1.09240 | 0.71571  | -2.18783 |
| H | -3.60923 | -1.68345 | 0.05614  |
| H | -2.49378 | -1.00969 | 2.17553  |
| H | -0.55216 | 0.55790  | 2.09166  |
| H | 2.26576  | 1.63665  | -1.08212 |
| H | 2.77424  | 0.13289  | 0.69171  |
| H | 1.03401  | -1.61800 | -1.18326 |
| H | 1.21549  | 0.57995  | -1.80049 |
| C | 2.21997  | -2.60577 | 0.41225  |
| H | 2.71953  | -3.31416 | -0.25567 |
| H | 2.91879  | -2.30327 | 1.19558  |
| H | 1.37829  | -3.13285 | 0.87302  |
| N | -2.39819 | -0.53688 | -1.17420 |
| C | 0.89718  | 2.37505  | 0.91149  |
| H | 0.05764  | 2.95026  | 1.30183  |
| H | 1.28581  | 1.71875  | 1.69575  |
| H | 1.68036  | 3.06688  | 0.59355  |

There are no imaginary frequencies.

SCF energy: -512.122937 hartree  
 $\alpha/\beta$ : -0.213785707 hartree  
 $\alpha\beta$ : -1.20651874 hartree  
SCS-MP2 energy: -513.7132833 hartree  
zero-point correction: +0.228863 hartree  
enthalpy correction: +0.241807 hartree  
free energy correction: +0.190347 hartree  
quasiharmonic free energy correction: +0.191741 hartree

**TS S-136**

There are no imaginary frequencies.

SCF energy: -512.111195 hartree  
 $\alpha/\beta$ : -0.214049219 hartree  
 $\alpha\beta$ : -1.208347294 hartree  
SCS-MP2 energy: -513.7039112 hartree  
zero-point correction: +0.230178 hartree  
enthalpy correction: +0.242726 hartree  
free energy correction: +0.192304 hartree  
quasiharmonic free energy correction: +0.193602 hartree

|   |          |          |          |
|---|----------|----------|----------|
| C | -0.61740 | 1.65539  | -0.62774 |
| C | 0.55574  | 0.33480  | 1.05236  |
| C | 1.68380  | 2.02577  | -0.00955 |
| C | 0.56051  | 2.35464  | -0.79464 |
| C | -0.64169 | 0.65865  | 0.37256  |
| N | -1.72176 | -0.17897 | 0.54860  |
| N | -1.33424 | -1.74800 | -0.50842 |
| C | -0.09409 | -2.11672 | -0.11410 |
| C | 1.06127  | -1.51950 | -0.57510 |
| H | 0.52880  | -0.36858 | 1.88238  |
| H | 2.60752  | 2.58778  | -0.12707 |
| H | 0.63180  | 3.15430  | -1.52555 |
| H | -1.50108 | 1.90150  | -1.20843 |

|   |          |          |          |
|---|----------|----------|----------|
| H | -1.24640 | -1.16427 | -1.35556 |
| H | -0.04048 | -2.83135 | 0.70704  |
| H | 0.97258  | -0.81148 | -1.40244 |
| H | -1.71998 | -0.67785 | 1.44649  |
| C | 2.42864  | -1.96005 | -0.19599 |
| H | 3.07043  | -1.09113 | -0.02242 |
| H | 2.41638  | -2.58907 | 0.69757  |
| H | 2.87374  | -2.52826 | -1.02244 |
| N | 1.69427  | 1.06388  | 0.91798  |
| C | -3.07964 | 0.18136  | 0.09828  |
| H | -3.07569 | 0.33530  | -0.97934 |
| H | -3.73265 | -0.65083 | 0.35165  |
| H | -3.39561 | 1.08960  | 0.61448  |

1 imaginary frequency:  $-345.83 \text{ cm}^{-1}$ .

SCF energy: -512.054835 hartree  
 $\alpha\alpha/\beta\beta$ : -0.222037679 hartree  
 $\alpha\beta$ : -1.229912403 hartree  
SCS-MP2 energy: -513.678755 hartree  
zero-point correction: +0.227525 hartree  
enthalpy correction: +0.239600 hartree  
free energy correction: +0.191219 hartree  
quasiharmonic free energy correction: +0.191562 hartree

**TS S-138**

1 imaginary frequency:  $-275.19 \text{ cm}^{-1}$ .

SCF energy: -512.059803 hartree  
 $\alpha\alpha/\beta\beta$ : -0.221475179 hartree  
 $\alpha\beta$ : -1.228038875 hartree  
SCS-MP2 energy: -513.6810998 hartree  
zero-point correction: +0.228536 hartree  
enthalpy correction: +0.240632 hartree  
free energy correction: +0.192123 hartree  
quasiharmonic free energy correction: +0.192522 hartree

**TS S-137**

|   |          |          |          |
|---|----------|----------|----------|
| C | -1.12806 | -1.43628 | -0.83533 |
| C | -0.53164 | 0.00475  | 1.02287  |
| C | -2.66647 | 0.10931  | 0.17371  |
| C | -2.38091 | -0.86541 | -0.80564 |
| C | -0.17333 | -1.04764 | 0.13983  |
| N | 1.08249  | -1.59240 | 0.03349  |
| N | 1.89802  | -0.24023 | -1.09757 |
| C | 1.74933  | 0.97594  | -0.51355 |
| C | 0.52169  | 1.60326  | -0.55836 |
| H | 0.12424  | 0.29699  | 1.83695  |
| H | -3.65978 | 0.55103  | 0.22376  |
| H | -3.14948 | -1.15478 | -1.51622 |
| H | -0.86320 | -2.20818 | -1.55435 |
| H | 1.31105  | -0.46463 | -1.90765 |
| H | 2.55569  | 1.30879  | 0.13098  |
| H | -0.21038 | 1.26223  | -1.29087 |
| C | 0.28193  | 2.91680  | 0.10169  |
| H | -0.71914 | 2.94469  | 0.53815  |
| H | 1.02483  | 3.11726  | 0.87666  |
| H | 0.33275  | 3.70997  | -0.65317 |
| H | 2.84216  | -0.63631 | -1.15627 |
| N | -1.79073 | 0.52301  | 1.08956  |
| C | 1.93103  | -1.46021 | 1.22252  |
| H | 2.90786  | -1.89204 | 0.99363  |
| H | 2.07762  | -0.43446 | 1.57972  |
| H | 1.47589  | -2.03635 | 2.03391  |

|   |          |          |          |
|---|----------|----------|----------|
| C | 0.44916  | -1.78911 | -0.50491 |
| C | -0.55200 | -0.08052 | 0.91052  |
| C | -1.91903 | -1.78608 | -0.04942 |
| C | -0.80801 | -2.32979 | -0.70287 |
| C | 0.63553  | -0.69309 | 0.38038  |
| N | 1.79729  | -0.07787 | 0.67788  |
| N | 1.57258  | 1.62891  | -0.47138 |
| C | 0.39614  | 2.15244  | -0.10707 |
| C | -0.77689 | 1.54533  | -0.56190 |
| H | -0.50194 | 0.57822  | 1.77031  |
| H | -2.55361 | -0.37818 | 1.26751  |
| H | -2.92525 | -2.18246 | -0.12560 |
| H | -0.95201 | -3.18674 | -1.35202 |
| H | 1.30581  | -2.26420 | -0.97299 |
| H | 2.32288  | 2.11317  | 0.04034  |
| H | 0.32209  | 2.91785  | 0.67071  |
| H | -0.68382 | 0.85928  | -1.40470 |
| C | -2.12938 | 2.12444  | -0.29785 |
| H | -2.90910 | 1.35824  | -0.31962 |
| H | -2.16272 | 2.64893  | 0.66049  |
| H | -2.36365 | 2.84266  | -1.09294 |
| N | -1.73806 | -0.75113 | 0.77238  |
| C | 2.99219  | -0.59802 | 0.00690  |
| H | 3.80637  | 0.10908  | 0.17602  |
| H | 3.27596  | -1.55426 | 0.45931  |
| H | 2.86999  | -0.73463 | -1.07156 |

1 imaginary frequency:  $-121.20 \text{ cm}^{-1}$ .

SCF energy: -512.039899 hartree  
 $\alpha\alpha/\beta\beta$ : -0.22368334 hartree  
 $\alpha\beta$ : -1.235256326 hartree  
SCS-MP2 energy: -513.6713288 hartree  
zero-point correction: +0.227280 hartree  
enthalpy correction: +0.239377 hartree  
free energy correction: +0.191124 hartree  
quasiharmonic free energy correction: +0.191401 hartree

## References

- 
- <sup>1</sup> Gaussian 09, *Revision D.01*, M. J. Frisch, G. W. Trucks, H. B. Schlegel, G. E. Scuseria, M. A. Robb, J. R. Cheeseman, G. Scalmani, V. Barone, B. Mennucci, G. A. Petersson, H. Nakatsuji, M. Caricato, X. Li, H. P. Hratchian, A. F. Izmaylov, J. Bloino, G. Zheng, J. L. Sonnenberg, M. Hada, M. Ehara, K. Toyota, R. Fukuda, J. Hasegawa, M. Ishida, T. Nakajima, Y. Honda, O. Kitao, H. Nakai, T. Vreven, J. A. Montgomery, Jr., J. E. Peralta, F. Ogliaro, M. Bearpark, J. J. Heyd, E. Brothers, K. N. Kudin, V. N. Staroverov, T. Keith, R. Kobayashi, J. Normand, K. Raghavachari, A. Rendell, J. C. Burant, S. S. Iyengar, J. Tomasi, M. Cossi, N. Rega, J. M. Millam, M. Klene, J. E. Knox, J. B. Cross, V. Bakken, C. Adamo, J. Jaramillo, R. Gomperts, R. E. Stratmann, O. Yazyev, A. J. Austin, R. Cammi, C. Pomelli, J. W. Ochterski, R. L. Martin, K. Morokuma, V. G. Zakrzewski, G. A. Voth, P. Salvador, J. J. Dannenberg, S. Dapprich, A. D. Daniels, O. Farkas, J. B. Foresman, J. V. Ortiz, J. Cioslowski, and D. J. Fox, Gaussian, Inc., Wallingford CT, 2013.
- <sup>2</sup> Marenich, A. V.; Cramer, C. J.; Truhlar, D. G. *J. Phys. Chem. B*, **2009**, *113*, 6378.
- <sup>3</sup> a) Grimme, S. *J. Chem. Phys.* **2003**, *118*, 9095; b) Gerenkamp, M.; Grimme, S. *Chem. Phys. Lett.* **2004**, *392*, 229.
- <sup>4</sup> Goumans, T. P. M.; Ehlers, A. W.; Lammertsma, K.; Würthwein, E.-U.; Grimme, S. *Chem. Eur. J.* **2004**, *10*, 6468.
- <sup>5</sup> Çelebi-Ölçüm, N.; Boal, B. W.; Hutters, A. D.; Garg, N. K.; Houk, K. N. *J. Am. Chem. Soc.* **2011**, *133*, 5752.
- <sup>6</sup> (a) Ribeiro, R. F.; Marenich, A. V.; Cramer, C. J.; Truhlar, D. G. *J. Phys. Chem. B* **2011**, *115*, 14556. (b) Zhao, Y.; Truhlar, D. G. *Phys. Chem. Chem. Phys.* **2008**, *10*, 2813.
- <sup>7</sup> CYLview, 1.0b; Legault, C. Y., Université de Sherbrooke, 2009 (<http://www.cylview.org>)
